# Supplementary material for: Access to dihydropyrano[3,2-b]pyrrol-5-ones skeletons by N-heterocyclic carbene-catalyzed [3+3] annulations
Source: Royal Society of Chemistry journal article supplement (doi:10.1039/d0cc04661b), 2020-01-01

## Access to Dihydropyrano[3,2-b]pyrrol-5-ones Skeletons by *N*- Heterocyclic Carbene-Catalyzed [3 + 3] Annulations

Ya-Tong Wu,<sup>a,†</sup> Rui Zhang,<sup>a,†</sup> Xiao-Yong Duan,<sup>\*, a, b</sup> Hai-Fei Yu,<sup>a</sup> Bo-Yu Sun,<sup>a</sup> and Jing Qi<sup>\*, a, b</sup>

<sup>a</sup>Key Laboratory of Chemical Biology of Hebei Province, College of Chemistry and Environmental Science, Hebei University, Baoding 071002, People's Republic of China.

<sup>b</sup>Key Laboratory of Medicinal Chemistry and Molecular Diagnosis of the Ministry of Education, Hebei University, Baoding 071002, People's Republic of China.

\* Email: [qjjinghbu2013@126.com](mailto:qjjinghbu2013@126.com); [duanxy05@126.com](mailto:duanxy05@126.com).

† These authors contributed equally.

### Table of Contents

|                                                                      |    |
|----------------------------------------------------------------------|----|
| <b>Part 1:</b> General Information.....                              | 2  |
| <b>Part 2:</b> Experimental Section.....                             | 2  |
| <b>Part 3:</b> Characterization of Products.....                     | 7  |
| <b>Part 4:</b> HPLC spectra for all products.....                    | 20 |
| <b>Part 5:</b> <sup>1</sup> HNMR and <sup>13</sup> CNMR spectra..... | 50 |

## Part 1: General Information

Unless otherwise specified, all reactions were carried out under a nitrogen atmosphere in an oven-dried sealed tube, with dry, freshly distilled solvents in anhydrous conditions. The solvents were distilled by standard methods. Reagents were obtained from commercial suppliers and used without further purification unless otherwise noted. The silica gel (200-300 meshes) was used for column chromatography, and the distillation range of petroleum was 60-90 °C. <sup>1</sup>H and <sup>13</sup>C NMR spectra were recorded on Bruker 600 or 400 MHz instrument in CDCl<sub>3</sub>, and spectral data were reported in ppm relative to tetramethylsilane (TMS) as internal standard. The high resolution mass spectra (HRMS) were measured on a Bruker Daltonics Apex Ultra spectrometer by ESI. The determination of enantiomeric excess was performed via chiral HPLC analysis Thermo Ulti Mate 3000 HPLC workstation. Optical rotations were measured by Rudolph Research Analytical Autopol-I instrument.

## Part 2: Experimental Section

### 1. General procedure for the synthesis of pyrrol-4-one **2** (**2a** as an example).

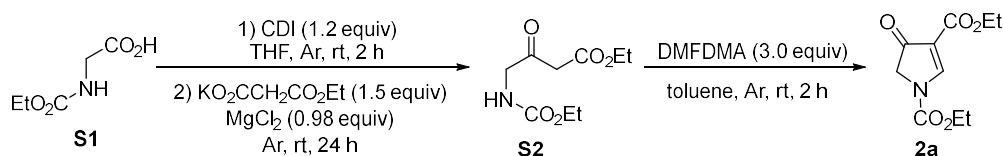

To a solution of **S1** (10 mmol) in anhydrous THF (50 mL) under argon was added CDI (2.01 g, 12 mmol) and the resulting reaction mixture was stirred at room temperature for 2 hours, followed by the addition of a solid mixture of MgCl<sub>2</sub> (0.95 g, 9.80 mmol) and ethyl potassium malonate (2.37 g, 15.00 mmol). The reaction mixture was stirred at room temperature for additional 24 h. Volatile components were evaporated in vacuo, the residue was dissolved in EtOAc (150 mL) and washed with NaHSO<sub>4</sub> (1 M in H<sub>2</sub>O, 50 mL), saturated NaCl (50 mL), saturated NaHCO<sub>3</sub> (20 mL), and saturated NaCl (50 mL). The organic phase was dried over anhydrous Na<sub>2</sub>SO<sub>4</sub>, filtered, and volatile components evaporated in vacuo. The residue was purified by column chromatography on silica gel eluting with Petroleum ether/EtOAc (3:1) to give the desired product **S2** as a white solid (1.6 g, 75% yield).

To a solution **S2** (5 mmol) in anhydrous toluene (10 mL) under argon was added DMFDMA (15

mol) and the resulting reaction mixture was stirred at room temperature or at elevated temperature until completion of the reaction judging by TLC-analysis. Volatile components were evaporated in vacuo and the residue was as quickly as possible purified by column chromatography on silica gel eluting with Petroleum ether/EtOAc (3:1) to give the desired product **2** as a yellow oil (1.6 g, 70% yield). The products were characterized as soon as isolated and stored under argon. <sup>1</sup>H NMR (400 MHz, CDCl<sub>3</sub>) δ 7.60 (d, *J* = 1.2 Hz, 1H), 7.43 (s, 1H), 6.77 (s, 1H), 4.45-4.29 (m, 8H), 4.22 (s, 2H), 1.43-1.32 (m, 12H); <sup>13</sup>C NMR (100 MHz, CDCl<sub>3</sub>) δ 191.6, 166.1, 163.1, 161.3, 149.8, 146.3, 121.0, 113.8, 108.5, 101.5, 64.2, 60.6, 55.6, 14.2, 14.1.

**2.** General procedure for the catalytic reactions of enal **1** with pyrrol-4-one **2** to synthesis dihydropyrano[3,2-*b*]pyrrol-5-ones **3** (**3a** as an example).

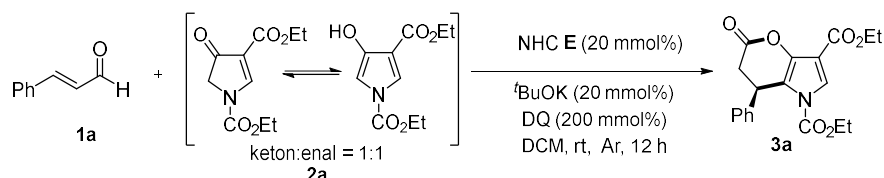

A dry 25 mL Schlenk tube with stir bar was charged with **2a** (34 mg, 0.15 mmol, 1.5 equiv), NHC **E** (8.4 mg, 0.01 mmol, 0.2 equiv), <sup>t</sup>BuOK (2 mg, 0.02 mmol, 0.2 equiv), DQ (82 mg, 2.0 equiv). The tube was evacuated, and refilled with argon. Then enals **1a** (13 mg, 0.1 mmol, 1.0 equiv) was added and the mixture was dissolved with newly distilled solvent DCM (1 mL). The mixture was stirred at room temperature for 12 hours when the substrate was consumed completely (monitored by TLC). The reaction mixture was concentrated under vacuum and purified by column chromatography on silica gel using Petroleum ether/EtOAc (3:1) as eluent to afford desired product **3a** as yellow oil (32.8 mg, 92% yield).

**3.** General procedure for the catalytic reactions of enal **4** with pyrrol-4-one **2** to synthesis pyrano[3,2-*b*]pyrrol-5-ones **5** (**5b** as an example).

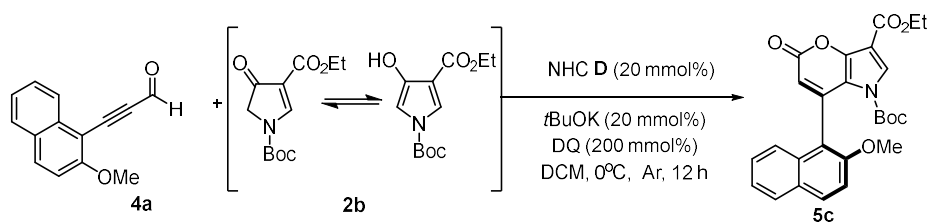

A dry 25 mL Schlenk tube with stir bar was charged with **2a** (34 mg, 0.15 mmol, 1.5 equiv), NHC **D** (8.4 mg, 0.01 mmol, 0.2 equiv), <sup>t</sup>BuOK (2 mg, 0.02 mmol, 0.2 equiv), DQ (82 mg, 2.0

equiv). The tube was evacuated, and refilled with argon. Then ynals **4a** (13 mg, 0.1 mmol, 1.0 equiv) was added and the mixture was dissolved with newly distilled solvent DCM (1 mL). The mixture was stirred at 0°C for 12 hours when the substrate was consumed completely (monitored by TLC). The reaction mixture was concentrated under vacuum and purified by column chromatography on silica gel using Petroleum ether/EtOAc (3:1) as eluent to afford desired product **5c** as yellow solid (25.5 mg, 55% yield).

Scheme 1. Optimization of [3+3] atroposelective annulation reaction conditions<sup>a</sup>

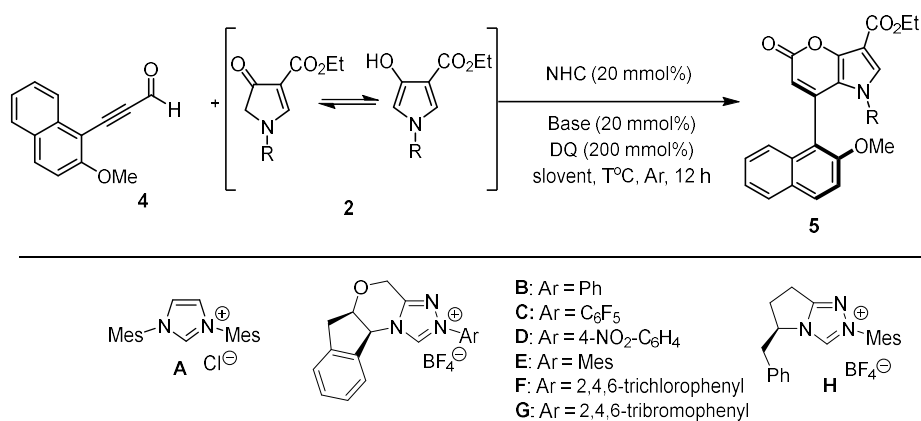

| entry | NHC      | base                            | solvent | T/°C | Yield (%) | ee (%) |
|-------|----------|---------------------------------|---------|------|-----------|--------|
| 1     | <b>A</b> | <sup>t</sup> BuOK               | DCM     | rt   | 54        | 0      |
| 2     | <b>B</b> | <sup>t</sup> BuOK               | DCM     | rt   | 45        | 10     |
| 3     | <b>C</b> | <sup>t</sup> BuOK               | DCM     | rt   | trace     | -      |
| 4     | <b>D</b> | <sup>t</sup> BuOK               | DCM     | rt   | 71        | 60     |
| 5     | <b>E</b> | <sup>t</sup> BuOK               | DCM     | rt   | 32        | 24     |
| 6     | <b>F</b> | <sup>t</sup> BuOK               | DCM     | rt   | 20        | 36     |
| 7     | <b>G</b> | <sup>t</sup> BuOK               | DCM     | rt   | 12        | 31     |
| 8     | <b>H</b> | <sup>t</sup> BuOK               | DCM     | rt   | 58        | 45     |
| 9     | <b>D</b> | <sup>t</sup> BuOK               | DCM     | 0    | 55        | 70     |
| 10    | <b>D</b> | <sup>t</sup> BuOK               | THF     | 0    | 12        | -      |
| 11    | <b>D</b> | Cs <sub>2</sub> CO <sub>3</sub> | DCM     | 0    | 78        | 42     |
| 12    | <b>D</b> | K <sub>2</sub> CO <sub>3</sub>  | DCM     | 0    | 73        | 35     |
| 13    | <b>D</b> | DBU                             | DCM     | 0    | 28        | 60     |
| 14    | <b>D</b> | DIPEA                           | DCM     | 0    | 39        | 56     |

|    |          |                                 |                    |   |       |    |
|----|----------|---------------------------------|--------------------|---|-------|----|
| 15 | <b>D</b> | Et <sub>3</sub> N               | DCM                | 0 | trace | -  |
| 16 | <b>D</b> | TBD                             | DCM                | 0 | 28    | 54 |
| 17 | <b>D</b> | DMAP                            | DCM                | 0 | 49    | 60 |
| 18 | <b>D</b> | Na <sub>2</sub> CO <sub>3</sub> | DCM                | 0 | 30    | 31 |
| 19 | <b>D</b> | NaOAc                           | DCM                | 0 | 24    | 42 |
| 20 | <b>D</b> | <sup>t</sup> BuOK               | CH <sub>3</sub> CN | 0 | 68    | 40 |
| 21 | <b>D</b> | <sup>t</sup> BuOK               | toluene            | 0 | 24    | 30 |
| 22 | <b>D</b> | <sup>t</sup> BuOK               | PhCl               | 0 | 58    | 45 |
| 23 | <b>D</b> | <sup>t</sup> BuOK               | PhCF <sub>3</sub>  | 0 | trace | -  |
| 24 | <b>D</b> | <sup>t</sup> BuOK               | 1,4-dioxane        | 0 | trace | -  |
| 25 | <b>D</b> | <sup>t</sup> BuOK               | CHCl <sub>3</sub>  | 0 | 58    | 55 |
| 26 | <b>D</b> | <sup>t</sup> BuOK               | DCM                | 0 | 62    | 53 |

<sup>a</sup>Reaction conditions: **4** (0.1 mmol, 1.0 equiv), **2** (0.15 mmol, 1.5 equiv), solvent (1.0 mL); For entries 1-25, R = Boc; For entry 26, R = CO<sub>2</sub>Et. <sup>b</sup>Isolated yield after flash chromatography. <sup>c</sup>Determined by chiral-phase HPLC analysis. TBD = 1,5,7-Triazabicyclo[4.4.0]dec-5-ene, DBU = 1,8-diazabicyclo[5.4.0]-undec-7-ene, Mes = mesityl

#### 4. Reaction procedure for the catalytic reactions of $\alpha,\beta\text{-}\gamma,\delta\text{-}$ diunsaturated aldehyde **6** with pyrrol-4-one **2a** to synthesis polysubstituted indole **7**.

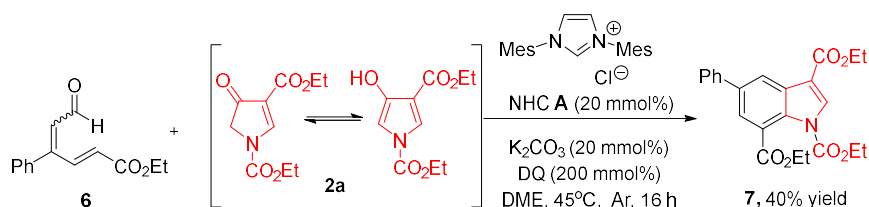

A dry 25 mL Schlenk tube with stir bar was charged with **2a** (34 mg, 0.15 mmol, 1.5 equiv), NHC **A** (6.8 mg, 0.01 mmol, 0.2 equiv), K<sub>2</sub>CO<sub>3</sub> (3 mg, 0.02 mmol, 0.2 equiv), DQ (82 mg, 2.0 equiv). The tube was evacuated, and refilled with nitrogen. Then  $\alpha,\beta\text{-}\gamma,\delta\text{-}$ diunsaturated aldehyde **6** (23 mg, 0.1 mmol, 1.0 equiv) was added and the mixture was dissolved with newly distilled solvent DME (1 mL). The mixture was stirred at 25°C for 16 hours when the substrate was consumed completely (monitored by TLC). The reaction mixture was concentrated under vacuum and purified by column chromatography on silica gel using Petroleum ether/EtOAc (8:1) as eluent to afford desired product **7** as white solid (16.4mg, 40% yield).

Scheme 2. Optimization of the cascade reaction conditions<sup>a</sup>

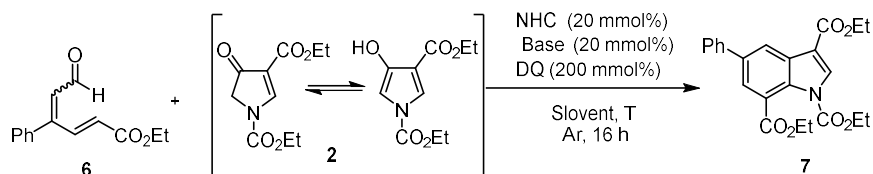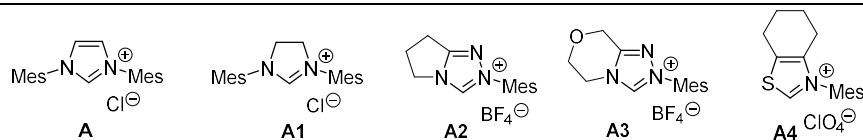

| entry | NHC       | base                            | solvent | T/°C | Yield (%) |
|-------|-----------|---------------------------------|---------|------|-----------|
| 1     | <b>A</b>  | K <sub>2</sub> CO <sub>3</sub>  | THF     | rt   | 28        |
| 2     | <b>A1</b> | K <sub>2</sub> CO <sub>3</sub>  | THF     | rt   | 21        |
| 3     | <b>A2</b> | K <sub>2</sub> CO <sub>3</sub>  | THF     | rt   | trace     |
| 4     | <b>A3</b> | K <sub>2</sub> CO <sub>3</sub>  | THF     | rt   | trace     |
| 5     | <b>A4</b> | K <sub>2</sub> CO <sub>3</sub>  | THF     | rt   | trace     |
| 6     | <b>A</b>  | DBU                             | THF     | rt   | 12        |
| 7     | <b>A</b>  | Cs <sub>2</sub> CO <sub>3</sub> | THF     | rt   | 15        |
| 8     | <b>A</b>  | Na <sub>2</sub> CO <sub>3</sub> | THF     | rt   | 23        |
| 9     | <b>A</b>  | <sup>t</sup> BuOK               | THF     | rt   | trace     |
| 10    | <b>A</b>  | K <sub>3</sub> PO <sub>4</sub>  | THF     | rt   | 18        |
| 11    | <b>A</b>  | NaOAc                           | THF     | rt   | 26        |
| 12    | <b>A</b>  | NaOAc                           | THF     | rt   | 25        |
| 13    | <b>A</b>  | CsOAc                           | THF     | rt   | 21        |
| 14    | <b>A</b>  | LiOAc                           | THF     | rt   | trace     |
| 15    | <b>A</b>  | PhCO <sub>2</sub> Na            | THF     | rt   | 10        |
| 16    | <b>A</b>  | PhCO <sub>2</sub> K             | THF     | rt   | 14        |
| 17    | <b>A</b>  | DABCO                           | THF     | rt   | 8         |
| 18    | <b>A</b>  | KHMDS                           | THF     | rt   | 18        |
| 19    | <b>A</b>  | DMAP                            | THF     | rt   | 15        |
| 20    | <b>A</b>  | DIPEA                           | THF     | rt   | 24        |
| 21    | <b>A</b>  | TMEDA                           | THF     | rt   | 22        |

|    |   |                                |                    |    |       |
|----|---|--------------------------------|--------------------|----|-------|
| 22 | A | K <sub>2</sub> CO <sub>3</sub> | DCM                | rt | trace |
| 23 | A | K <sub>2</sub> CO <sub>3</sub> | CH <sub>3</sub> CN | rt | trace |
| 24 | A | K <sub>2</sub> CO <sub>3</sub> | 1,4-dioxane        | rt | 25    |
| 25 | A | K <sub>2</sub> CO <sub>3</sub> | EtOAc              | rt | 20    |
| 26 | A | K <sub>2</sub> CO <sub>3</sub> | toluene            | rt | 26    |
| 27 | A | K <sub>2</sub> CO <sub>3</sub> | DME                | rt | 35    |
| 28 | A | K <sub>2</sub> CO <sub>3</sub> | PhCF <sub>3</sub>  | rt | 6     |
| 29 | A | K <sub>2</sub> CO <sub>3</sub> | DME                | 45 | 40    |
| 30 | A | K <sub>2</sub> CO <sub>3</sub> | DME                | 60 | 32    |
| 31 | A | K <sub>2</sub> CO <sub>3</sub> | DME                | 50 | 36    |

<sup>a</sup>Reaction conditions: **4** (0.1 mmol, 1.0 equiv), **2** (0.15 mmol, 1.5 equiv), solvent (1.0 mL); <sup>b</sup>Isolated yield after flash chromatography. TBD = 1,5,7-Triazabicyclo[4.4.0]dec-5-ene, DBU = 1,8-diazabicyclo[5.4.0]-undec-7-ene, DABCO = 1,4-Diazabicyclo[2.2.2]octane, TMEDA = N,N,N',N'-Tetramethylethylenediamine, DME = 1,2-Dimethoxyethane, Mes = mesityl.

### Part 3: Characterization of Products.

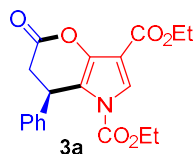

**3a**, Prepared according to the general procedure in 0.1 mmol scale, 92% yield, 32.9 mg, colorless oil. <sup>1</sup>H NMR (400 MHz, CDCl<sub>3</sub>) δ 7.82 (s, 1H), 7.31-7.22 (m, 3H), 7.07 (d, *J* = 7.2 Hz, 2H), 4.82 (d, *J* = 8.0 Hz, 1H), 4.39-4.26 (m, 4H), 3.24 (dd, *J*<sub>1</sub> = 16.0 Hz, *J*<sub>2</sub> = 8.0 Hz, 1H), 2.95 (d, *J* = 16.0 Hz, 1H), 1.39 (t, *J* = 7.2 Hz, 3H), 1.26 (t, *J* = 7.2 Hz, 3H); <sup>13</sup>C NMR (100 MHz, CDCl<sub>3</sub>) δ 165.9, 162.0, 149.1, 140.6, 140.2, 129.1, 127.6, 126.5, 124.4, 115.7, 109.2, 64.5, 60.8, 37.8, 36.8, 14.3, 14.0; HRMS (ESI): calculated for C<sub>19</sub>H<sub>23</sub>N<sub>2</sub>O<sub>6</sub><sup>+</sup>, [M+NH<sub>4</sub>]<sup>+</sup> 375.1551, Found 375.1547. [α]<sub>D</sub><sup>25</sup> = -98.8 (c = 1.0 in CHCl<sub>3</sub>); HPLC analysis: 92% ee, [CHIRALPAK AD column; 1.0 mL/min; solvent system: hexane/*i*-PrOH = 90:10; retention times: 12.4 min (minor), 14.0 min (major)].

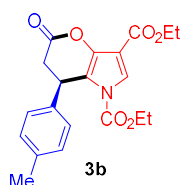

**3b**, Prepared according to the general procedure in 0.1 mmol scale, 66% yield, 24.5 mg, light yellow oil. <sup>1</sup>H NMR (400 MHz, CDCl<sub>3</sub>) δ 7.82 (s, 1H), 7.09 (d, *J* = 7.6 Hz, 2H), 6.96 (d, *J* = 8.0 Hz, 2H),

4.78 (d,  $J = 8.0$  Hz, 1H), 4.40-4.30 (m, 4H), 3.22 (dd,  $J_1 = 15.6$  Hz,  $J_2 = 8.0$  Hz, 1H), 2.92 (d,  $J = 15.6$  Hz, 1H), 2.90 (s, 3H), 1.39 (t,  $J = 7.2$  Hz, 3H), 1.29 (t,  $J = 7.2$  Hz, 3H);  $^{13}\text{C}$  NMR (100 MHz,  $\text{CDCl}_3$ )  $\delta$  166.0, 162.1, 149.1, 140.1, 137.6, 137.3, 129.8, 129.2, 126.4, 126.3, 124.3, 116.1, 109.2, 64.5, 60.8, 38.0, 36.4, 21.0, 14.3, 14.0; **HRMS** (ESI): calculated for  $\text{C}_{20}\text{H}_{22}\text{NO}_6^+$ ,  $[\text{M}+\text{H}]^+$  372.1442, Found 372.1440.

$[\alpha]_D^{25} = -99.8$  ( $c = 1.0$  in  $\text{CHCl}_3$ ); **HPLC analysis**: 94% ee, [CHIRALPAK AD column; 1.0 mL/min; solvent system: hexane/*i*-PrOH = 90:10; retention times: 11.2 min (minor), 12.5 min (major)].

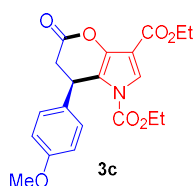

**3c**, Prepared according to the general procedure in 0.1 mmol scale, 57% yield, 22.1 mg, colorless oil;  $^1\text{H}$  NMR (400 MHz,  $\text{CDCl}_3$ )  $\delta$  7.81 (s, 1H), 6.99 (d,  $J = 8.4$  Hz, 2H), 6.81 (d,  $J = 8.8$  Hz, 2H), 4.77 (d,  $J = 7.2$  Hz, 1H), 4.39-4.28 (m, 4H), 3.76 (s, 3H), 3.21 (dd,  $J_1 = 15.6$  Hz,  $J_2 = 8.0$  Hz, 1H), 2.91 (d,  $J = 15.6$  Hz, 1H), 1.39 (t,  $J = 7.2$  Hz, 3H), 1.29 (t,  $J = 7.2$  Hz, 3H);  $^{13}\text{C}$  NMR (100 MHz,  $\text{CDCl}_3$ )  $\delta$  166.1, 162.0, 158.9, 149.1, 140.0, 132.7, 127.6, 124.3, 116.2, 114.4, 109.2, 64.5, 60.8, 55.2, 38.1, 36.0, 14.3, 14.0; **HRMS** (ESI): calculated for  $\text{C}_{20}\text{H}_{22}\text{NO}_7^+$ ,  $[\text{M}+\text{H}]^+$  388.1391, Found 388.1388.

$[\alpha]_D^{25} = -112.8$  ( $c = 1.0$  in  $\text{CHCl}_3$ ); **HPLC analysis**: 90% ee, [CHIRALPAK AD column; 1.0 mL/min; solvent system: hexane/*i*-PrOH = 90:10; retention times: 16.3 min (minor), 18.8 min (major)].

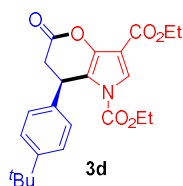

**3d**, Prepared according to the general procedure in 0.1 mmol scale, 70% yield, 28.9 mg, colorless oil;  $^1\text{H}$  NMR (400 MHz,  $\text{CDCl}_3$ )  $\delta$  7.81 (s, 1H), 7.27 (d,  $J = 8.4$  Hz, 2H), 7.01 (d,  $J = 8.4$  Hz, 2H), 4.79 (d,  $J = 7.6$  Hz, 1H), 4.39-4.29 (m, 2H), 3.21 (dd,  $J_1 = 16.0$  Hz,  $J_2 = 8.0$  Hz, 1H), 2.94 (d,  $J = 15.6$  Hz, 1H), 1.39 (t,  $J = 7.2$  Hz, 3H), 1.27 (t,  $J = 7.2$  Hz, 3H), 1.27 (s, 9H);  $^{13}\text{C}$  NMR (100 MHz,  $\text{CDCl}_3$ )  $\delta$  166.2, 162.1, 150.4, 149.1, 140.1, 137.5, 126.1, 126.0, 124.3, 116.2, 109.2, 64.5, 60.8, 37.9, 36.3, 34.4, 31.2, 14.3, 14.0; **HRMS** (ESI): calculated for  $\text{C}_{23}\text{H}_{27}\text{NNaO}_6^+$ ,  $[\text{M}+\text{Na}]^+$  436.1731,



Found 436.1728.

$[\alpha]^{25}_{\text{D}} = -117.6$  ( $c = 1.0$  in  $\text{CHCl}_3$ ); **HPLC analysis:** 95% ee, [CHIRALPAK AD column; 1.0 mL/min; solvent system: hexane/*i*-PrOH = 90:10; retention times: 8.5 min (minor), 10.1 min (major)].

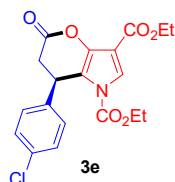

**3e**, Prepared according to the general procedure in 0.1 mmol scale, 82% yield, 32.1 mg, light yellow oil;  **$^1\text{H NMR}$**  (400 MHz,  $\text{CDCl}_3$ )  $\delta$  7.82 (s, 1H), 7.27 (d,  $J = 8.0$  Hz, 2H), 7.02 (d,  $J = 8.4$  Hz, 2H), 4.81 (d,  $J = 8.0$  Hz, 1H), 4.37-4.28 (m, 4H), 3.24 (dd,  $J_1 = 16.0$  Hz,  $J_2 = 8.0$  Hz, 1H), 2.92 (d,  $J = 16.0$  Hz, 1H), 1.39 (t,  $J = 7.2$  Hz, 3H), 1.30 (t,  $J = 7.1$  Hz, 3H);  **$^{13}\text{C NMR}$**  (100 MHz,  $\text{CDCl}_3$ )  $\delta$  165.6, 161.9, 149.0, 140.3, 139.2, 133.5, 129.3, 128.0, 124.5, 115.3, 109.3, 64.6, 60.8, 37.7, 36.2, 14.3, 14.0; **HRMS (ESI):** calculated for  $\text{C}_{19}\text{H}_{18}\text{ClNNaO}_6^+$ ,  $[\text{M}+\text{Na}]^+$  414.0715, Found 414.0712.

$[\alpha]^{25}_{\text{D}} = -101.6$  ( $c = 1.0$  in  $\text{CHCl}_3$ ); **HPLC analysis:** 94% ee, [CHIRALPAK AD column; 1.0 mL/min; solvent system: hexane/*i*-PrOH = 80:20; retention times: 7.7 min (minor), 8.5 min (major)].

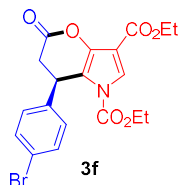

**3f**, Prepared according to the general procedure in 0.1 mmol scale, 78% yield, 34.0 mg, light yellow oil.  **$^1\text{H NMR}$**  (400 MHz,  $\text{CDCl}_3$ )  $\delta$  7.82 (s, 1H), 7.42 (d,  $J = 8.0$  Hz, 2H), 6.97 (d,  $J = 8.0$  Hz, 2H), 4.80 (d,  $J = 8.0$  Hz, 1H), 4.36-4.29 (m, 4H), 3.24 (dd,  $J_1 = 16.0$  Hz,  $J_2 = 8.0$  Hz, 1H), 2.92 (d,  $J = 16.0$  Hz, 1H), 1.39 (t,  $J = 7.2$  Hz, 3H), 1.30 (t,  $J = 7.2$  Hz, 3H);  **$^{13}\text{C NMR}$**  (100 MHz,  $\text{CDCl}_3$ )  $\delta$  165.5, 161.9, 149.0, 140.3, 139.7, 132.2, 128.3, 124.5, 121.5, 115.2, 109.3, 64.6, 60.8, 37.6, 36.3, 14.3, 14.0; **HRMS (ESI):** calculated for  $\text{C}_{19}\text{H}_{18}\text{BrNNaO}_6^+$ ,  $[\text{M}+\text{Na}]^+$  458.0210, Found 458.0203.

$[\alpha]^{25}_{\text{D}} = -103.6$  ( $c = 1.0$  in  $\text{CHCl}_3$ ); **HPLC analysis:** 94% ee, [CHIRALPAK AD column; 1.0 mL/min; solvent system: hexane/*i*-PrOH = 90:10; retention times: 13.5 min (minor), 15.4 min (major)].

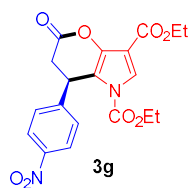

**3g**, Prepared according to the general procedure in 0.1 mmol scale, 90% yield, 36.2 mg, light yellow oil; **<sup>1</sup>H NMR** (400 MHz, CDCl<sub>3</sub>) δ 8.18 (d, *J* = 8.8 Hz, 2H), 7.84 (s, 1H), 7.28 (d, *J* = 8.8 Hz, 2H), 4.97 (d, *J* = 8.0 Hz, 1H), 4.32 (m, 4H), 3.31 (dd, *J*<sub>1</sub> = 16.0 Hz, *J*<sub>2</sub> = 8.0 Hz, 1H), 2.95 (d, *J* = 16.0 Hz, 1H), 1.40 (t, *J* = 7.2 Hz, 3H), 1.32 (t, *J* = 7.2 Hz, 3H); **<sup>13</sup>C NMR** (100 MHz, CDCl<sub>3</sub>) δ 165.0, 161.7, 148.9, 147.9, 147.4, 140.7, 127.7, 124.7, 124.5, 114.3, 109.4, 64.8, 60.9, 37.1, 36.5, 14.3, 14.0; **HRMS** (ESI): calculated for C<sub>19</sub>H<sub>18</sub>N<sub>2</sub>NaO<sub>8</sub><sup>+</sup>, [M+Na]<sup>+</sup> 425.0955, Found 425.0955. [α]<sub>D</sub><sup>25</sup> = -131.4 (c = 1.0 in CHCl<sub>3</sub>); **HPLC analysis**: 99% ee, [CHIRALPAK AD column; 1.0 mL/min; solvent system: hexane/*i*-PrOH = 90:10; retention times: 13.2 min (minor), 18.2 min (major)].

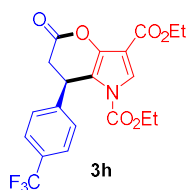

**3h**, Prepared according to the general procedure in 0.1 mmol scale, 81% yield, 34.5 mg, light yellow oil. **<sup>1</sup>H NMR** (400 MHz, CDCl<sub>3</sub>) δ 7.83 (s, 1H), 7.57 (d, *J* = 8.0 Hz, 2H), 7.22 (d, *J* = 8.0 Hz, 2H), 4.91 (d, *J* = 8.0 Hz, 1H), 4.40-4.31 (m, 4H), 3.28 (dd, *J*<sub>1</sub> = 16.0 Hz, *J*<sub>2</sub> = 8.0 Hz, 1H), 2.94 (d, *J* = 16.0 Hz, 1H), 1.40 (t, *J* = 7.2 Hz, 3H), 1.30 (t, *J* = 7.2 Hz, 3H); **<sup>13</sup>C NMR** (100 MHz, CDCl<sub>3</sub>) δ 165.4, 161.9, 149.0, 144.6, 140.5, 129.9 (q, *J* = 35.0 Hz), 127.9, 126.17, 126.13, 124.6, 123.9 (q, *J* = 270.0 Hz), 114.9, 109.3, 64.7, 60.9, 37.4, 36.6, 14.3, 14.0; **HRMS** (ESI): calculated for C<sub>20</sub>H<sub>18</sub>F<sub>3</sub>NNaO<sub>6</sub><sup>+</sup>, [M+Na]<sup>+</sup> 448.0978, Found 448.0974. [α]<sub>D</sub><sup>25</sup> = -99.6 (c = 1.0 in CHCl<sub>3</sub>); **HPLC analysis**: 95% ee, [CHIRALPAK AD column; 1.0 mL/min; solvent system: hexane/*i*-PrOH = 90:10; retention times: 11.6 min (minor), 13.4 min (major)].

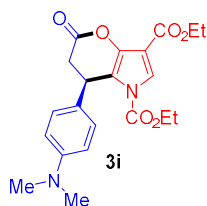

**3i**, Prepared according to the general procedure in 0.1 mmol scale, 85% yield, 34.0 mg, brown oil; **<sup>1</sup>H NMR** (400 MHz, CDCl<sub>3</sub>) δ 7.79 (s, 1H), 6.93 (d, *J* = 8.8 Hz, 2H), 6.62 (d, *J* = 8.4 Hz, 2H), 4.72

(d,  $J = 7.6$  Hz, 1H), 4.38-4.29 (m, 4H), 3.19 (dd,  $J_1 = 16.0$  Hz,  $J_2 = 8.0$  Hz, 1H), 2.93 (d,  $J = 4.0$  Hz, 1H), 2.90 (s, 6H), 1.39 (t,  $J = 7.2$  Hz, 3H), 1.30 (t,  $J = 7.2$  Hz, 3H).  **$^{13}\text{C}$  NMR** (100 MHz,  $\text{CDCl}_3$ )  $\delta$  166.3, 162.1, 149.9, 149.2, 139.8, 128.2, 127.2, 124.1, 116.8, 112.9, 109.1, 64.4, 60.7, 40.5, 38.2, 36.0, 14.3, 14.0; **HRMS** (ESI): calculated for  $\text{C}_{21}\text{H}_{25}\text{N}_2\text{O}_6^+$ ,  $[\text{M}+\text{H}]^+$  401.1707, Found 401.1702.  $[\alpha]_D^{25} = -92.2$  ( $c = 1.0$  in  $\text{CHCl}_3$ ); **HPLC analysis**: 90% ee, [CHIRALPAK AD column; 1.0 mL/min; solvent system: hexane/*i*-PrOH = 90:10; retention times: 15.3 min (minor), 18.7 min (major)].

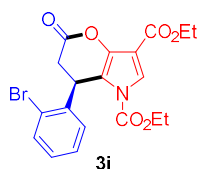

**3j**, Prepared according to the general procedure in 0.1 mmol scale, 63% yield, 27.5 mg, light yellow oil.  **$^1\text{H}$  NMR** (400 MHz,  $\text{CDCl}_3$ )  $\delta$  7.90 (s, 1H), 7.61 (d,  $J = 7.6$  Hz, 1H), 7.20-7.11 (m, 2H), 6.72 (d,  $J = 7.6$  Hz, 1H), 5.23 (d,  $J = 8.0$  Hz, 1H), 4.40-4.25 (m, 4H), 3.21 (dd,  $J_1 = 16.0$  Hz,  $J_2 = 8.4$  Hz, 1H), 3.04 (d,  $J = 16.0$  Hz, 1H), 1.40 (t,  $J = 7.2$  Hz, 3H), 1.18 (t,  $J = 7.2$  Hz, 3H);  **$^{13}\text{C}$  NMR** (100 MHz,  $\text{CDCl}_3$ )  $\delta$  165.6, 161.9, 149.1, 141.3, 138.9, 133.5, 129.3, 128.2, 127.4, 124.9, 123.1, 113.9, 109.2, 64.7, 60.8, 36.3, 35.8, 14.3, 13.8; **HRMS** (ESI): calculated for  $\text{C}_{19}\text{H}_{18}\text{BrNNaO}_6^+$ ,  $[\text{M}+\text{Na}]^+$  458.0210, Found 458.0205.

$[\alpha]_D^{25} = -120.4$  ( $c = 1.0$  in  $\text{CHCl}_3$ ); **HPLC analysis**: 98% ee, [CHIRALPAK AD column; 1.0 mL/min; solvent system: hexane/*i*-PrOH = 95:5; retention times: 17.2 min (minor), 18.4 min (major)].

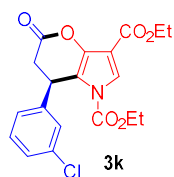

**3k**, Prepared according to the general procedure in 0.1 mmol scale, 63% yield, 24.7 mg, light yellow oil.  **$^1\text{H}$  NMR** (400 MHz,  $\text{CDCl}_3$ )  $\delta$  7.84 (s, 1H), 7.24 (d,  $J = 4.0$  Hz, 2H), 7.06 (s, 1H), 6.96 (d,  $J = 3.2$  Hz, 1H), 4.81 (d,  $J = 8.0$  Hz, 1H), 4.40-4.30 (m, 4H), 3.21 (dd,  $J_1 = 16.0$  Hz,  $J_2 = 8.0$  Hz, 1H), 2.94 (d,  $J = 16.0$  Hz, 1H), 1.40 (t,  $J = 7.2$  Hz, 3H), 1.30 (t,  $J = 7.2$  Hz, 3H);  **$^{13}\text{C}$  NMR** (100 MHz,  $\text{CDCl}_3$ )  $\delta$  165.5, 161.9, 149.0, 142.7, 140.5, 135.0, 13-0.5, 128.0, 126.8, 124.7, 124.6, 114.9, 109.3, 64.6, 60.9, 37.6, 36.5, 14.3, 14.0; **HRMS** (ESI): calculated for  $\text{C}_{19}\text{H}_{18}\text{ClNNaO}_6^+$ ,  $[\text{M}+\text{Na}]^+$  414.0715, Found 414.0711.

$[\alpha]_D^{25} = -120.4$  ( $c = 1.0$  in  $\text{CHCl}_3$ ); **HPLC analysis:** 95% ee, [CHIRALPAK AD column; 1.0 mL/min; solvent system: hexane/i-PrOH = 90:10; retention times: 14.0 min (minor), 17.3 min (major)].

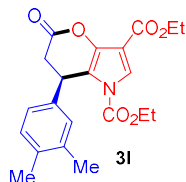

**3l**, Prepared according to the general procedure in 0.1 mmol scale, 75% yield, 28.9 mg, light yellow oil. **<sup>1</sup>H NMR** (400 MHz,  $\text{CDCl}_3$ )  $\delta$  7.81 (s, 1H), 7.04 (d,  $J = 7.6$  Hz, 2H), 6.80 (d,  $J = 8.0$  Hz, 2H), 4.75 (d,  $J = 7.6$  Hz, 1H), 4.40-4.27 (m, 4H), 3.21 (dd,  $J_1 = 16.0$  Hz,  $J_2 = 8.0$  Hz, 1H), 2.91 (d,  $J = 16.0$  Hz, 1H), 2.20 (s, 6H), 1.39 (t,  $J = 7.2$  Hz, 3H), 1.30 (t,  $J = 7.2$  Hz, 3H); **<sup>13</sup>C NMR** (100 MHz,  $\text{CDCl}_3$ )  $\delta$  166.1, 162.1, 149.1, 140.1, 138.0, 137.4, 135.9, 130.3, 127.6, 124.3, 123.9, 116.1, 109.2, 64.4, 60.8, 38.0, 36.4, 19.8, 19.4, 14.3, 14.0; **HRMS** (ESI): calculated for  $\text{C}_{21}\text{H}_{23}\text{NNaO}_6^+$ ,  $[\text{M}+\text{Na}]^+$  408.1418, Found 408.1414.

$[\alpha]_D^{25} = -124.4$  ( $c = 1.0$  in  $\text{CHCl}_3$ ); **HPLC analysis:** 90% ee, [CHIRALPAK AD column; 1.0 mL/min; solvent system: hexane/i-PrOH = 90:10; retention times: 10.1 min (minor), 11.5 min (major)].

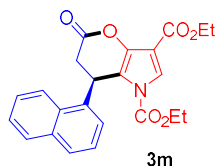

**3m**, Prepared according to the general procedure in 0.1 mmol scale, 65% yield, 26.5 mg, light yellow oil. **<sup>1</sup>H NMR** (400 MHz,  $\text{CDCl}_3$ )  $\delta$  8.04 (d,  $J = 8.4$  Hz, 1H), 7.93 (s, 1H), 7.90 (d,  $J = 8.4$  Hz, 1H), 7.75 (d,  $J = 8.4$  Hz, 2H), 7.61 (t,  $J = 7.6$  Hz, 1H), 7.54 (t,  $J = 7.6$  Hz, 2H), 7.30 (t,  $J = 7.6$  Hz, 1H), 6.86 (d,  $J = 7.2$  Hz, 2H), 5.66 (d,  $J = 8.0$  Hz, 1H), 4.40 (dd,  $J_1 = 6.8$  Hz,  $J_2 = 2.4$  Hz, 2H), 4.11 (dd,  $J_1 = 6.8$  Hz,  $J_2 = 2.4$  Hz, 2H), 3.36 (dd,  $J_1 = 15.6$  Hz,  $J_2 = 8.0$  Hz, 1H), 3.11 (d,  $J = 15.6$  Hz, 1H), 1.41 (t,  $J = 7.2$  Hz, 3H), 0.91 (t,  $J = 7.2$  Hz, 3H); **<sup>13</sup>C NMR** (100 MHz,  $\text{CDCl}_3$ )  $\delta$  165.6, 162.0, 149.1, 141.3, 135.6, 134.3, 130.2, 129.4, 128.4, 126.8, 125.9, 125.5, 124.8, 123.4, 131.9, 114.8, 109.3, 64.4, 60.8, 36.6, 32.6, 14.3, 13.6; **HRMS** (ESI): calculated for  $\text{C}_{23}\text{H}_{21}\text{NNaO}_6^+$ ,  $[\text{M}+\text{Na}]^+$  430.1261, Found 430.1255.

$[\alpha]_D^{25} = -235.0$  ( $c = 1.0$  in  $\text{CHCl}_3$ ); **HPLC analysis:** 99% ee, [CHIRALPAK AD column; 1.0

mL/min; solvent system: hexane/i-PrOH = 90:10; retention times: 14.9 min (minor), 20.2 min (major)].

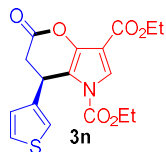

**3n**, Prepared according to the general procedure in 0.1 mmol scale, 67% yield, 24.3 mg, light yellow oil.  $^1\text{H NMR}$  (400 MHz,  $\text{CDCl}_3$ )  $\delta$  7.80 (s, 1H), 7.27 (dd,  $J_1 = 5.2$  Hz,  $J_2 = 3.2$  Hz, 1H), 6.92 (dd,  $J_1 = 5.2$  Hz,  $J_2 = 3.2$  Hz, 2H), 4.95 (d,  $J = 7.2$  Hz, 1H), 4.39-4.32 (m, 4H), 3.36 (dd,  $J_1 = 16.0$  Hz,  $J_2 = 7.6$  Hz, 1H), 3.00 (dd,  $J_1 = 16.0$  Hz,  $J_2 = 1.2$  Hz, 1H), 1.38 (t,  $J = 7.2$  Hz, 3H), 1.32 (t,  $J = 7.2$  Hz, 3H);  $^{13}\text{C NMR}$  (100 MHz,  $\text{CDCl}_3$ )  $\delta$  166.1, 161.9, 149.2, 141.1, 139.5, 127.0, 125.9, 124.2, 121.3, 1116.3, 109.3, 64.5, 60.7, 37.1, 32.0, 14.3, 14.0; **HRMS** (ESI): calculated for  $\text{C}_{17}\text{H}_{17}\text{NNaO}_6\text{S}^+$ ,  $[\text{M}+\text{Na}]^+$  386.0669, Found 386.0666.

$[\alpha]_D^{25} = -101.8$  ( $c = 1.0$  in  $\text{CHCl}_3$ ); **HPLC analysis**: 86% ee, [CHIRALPAK AD column; 1.0 mL/min; solvent system: hexane/i-PrOH = 93:7; retention times: 13.7 min (minor), 15.7 min (major)].

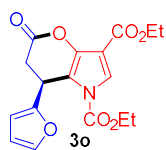

**3o**, Prepared according to the general procedure in 0.1 mmol scale, 72% yield, 25.0 mg, light yellow oil.  $^1\text{H NMR}$  (400 MHz,  $\text{CDCl}_3$ )  $\delta$  7.80 (s, 1H), 7.30 (s, 1H), 6.25 (d,  $J = 2.0$  Hz, 1H), 6.01 (d,  $J = 3.2$  Hz, 1H), 4.95 (t,  $J = 4.0$  Hz, 1H), 4.43-4.31 (m, 4H), 3.13-3.11 (m, 2H), 3.00 (dd,  $J_1 = 16.0$  Hz,  $J_2 = 1.2$  Hz, 1H), 1.39-1.34 (m, 6H);  $^{13}\text{C NMR}$  (100 MHz,  $\text{CDCl}_3$ )  $\delta$  165.7, 161.9, 152.7, 149.2, 142.4, 140.0, 124.3, 113.3, 110.3, 109.3, 106.1, 64.3, 60.7, 34.7, 30.6, 14.3, 14.0; **HRMS** (ESI): calculated for  $\text{C}_{17}\text{H}_{17}\text{NNaO}_7^+$ ,  $[\text{M}+\text{Na}]^+$  370.0897, Found 370.0892.

$[\alpha]_D^{25} = -60.6$  ( $c = 1.0$  in  $\text{CHCl}_3$ ); **HPLC analysis**: 90% ee, [CHIRALPAK AD column; 1.0 mL/min; solvent system: hexane/i-PrOH = 90:10; retention times: 12.2 min (minor), 13.7 min (major)].

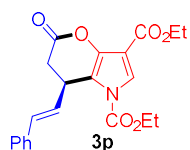

**3p**, Prepared according to the general procedure in 0.1 mmol scale, 50% yield, 19.2mg, light yellow oil.  $^1\text{H NMR}$  (400 MHz,  $\text{CDCl}_3$ )  $\delta$  7.80 (s, 1H), 7.80 (s, 1H), 7.31-7.22 (m, 5H), 6.33 (d,  $J = 16.0$

Hz, 1H), 6.21 (dd,  $J_1 = 16.0$  Hz,  $J_2 = 6.4$  Hz, 1H), 4.48-4.40 (m, 3H), 4.37-4.32 (m, 2H), 3.08 (dd,  $J_1 = 15.6$  Hz,  $J_2 = 7.6$  Hz, 1H), 2.98 (d,  $J = 15.6$  Hz, 1H), 1.41 (t,  $J = 7.2$  Hz, 3H), 1.38 (t,  $J = 7.2$  Hz, 3H);  $^{13}\text{C}$  NMR (100 MHz,  $\text{CDCl}_3$ )  $\delta$  166.3, 162.0, 149.2, 139.5, 136.1, 131.3, 128.5, 127.9, 127.3, 126.4, 124.2, 115.5, 109.3, 64.6, 60.8, 35.2, 33.6, 14.3, 14.2; **HRMS** (ESI): calculated for  $\text{C}_{21}\text{H}_{21}\text{NNaO}_6^+$ ,  $[\text{M}+\text{Na}]^+$  402.1261, Found 402.1260.

$[\alpha]_D^{25} = -84.6$  ( $c = 1.0$  in  $\text{CHCl}_3$ ); **HPLC analysis**: 83% ee, [CHIRALPAK AD column; 1.0 mL/min; solvent system: hexane/*i*-PrOH = 90:10; retention times: 21.2 min (minor), 24.1 min (major)].

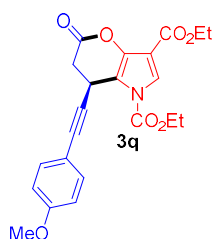

**3q**, Prepared according to the general procedure in 0.1 mmol scale, 55% yield, 22.6mg, light yellow oil.  $^1\text{H}$  NMR (400 MHz,  $\text{CDCl}_3$ )  $\delta$  7.81 (s, 1H), 7.28 (d,  $J = 8.8$  Hz, 1H), 6.79 (d,  $J = 8.8$  Hz, 1H), 4.71 (dd,  $J_1 = 7.2$  Hz,  $J_2 = 1.2$  Hz, 1H), 4.55-4.43 (m, 4H), 4.34 (q,  $J = 7.2$  Hz, 1H), 3.79 (s, 3H), 3.17 (dd,  $J_1 = 15.6$  Hz,  $J_2 = 1.6$  Hz, 1H), 3.05 (dd,  $J_1 = 15.6$  Hz,  $J_2 = 1.6$  Hz, 1H), 1.47 (t,  $J = 7.2$  Hz, 3H), 1.37 (t,  $J = 7.2$  Hz, 3H);  $^{13}\text{C}$  NMR (100 MHz,  $\text{CDCl}_3$ )  $\delta$  165.3, 161.9, 159.7, 149.2, 139.3, 133.2, 124.3, 114.4, 113.8, 113.1, 109.4, 105.6, 84.4, 83.2, 64.8, 60.8, 55.3, 24.1, 14.3, 14.1; **HRMS** (ESI): calculated for  $\text{C}_{22}\text{H}_{21}\text{NNaO}_7^+$ ,  $[\text{M}+\text{Na}]^+$  434.1210, Found 434.1211.

$[\alpha]_D^{25} = -24.4$  ( $c = 1.0$  in  $\text{CHCl}_3$ ); **HPLC analysis**: 81% ee, [CHIRALPAK AD column; 1.0 mL/min; solvent system: hexane/*i*-PrOH = 90:10; retention times: 36.6 min (minor), 46.5 min (major)].

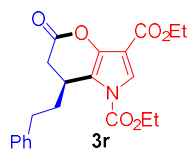

**3r**, Prepared according to the general procedure in 0.1 mmol scale, 65% yield, 25.1 mg, light yellow oil.  $^1\text{H}$  NMR (400 MHz,  $\text{CDCl}_3$ )  $\delta$  7.74 (s, 1H), 7.28-7.25 (m, 2H), 7.20-7.13 (m, 3H), 6.33 (d,  $J = 16.0$  Hz, 1H), 6.21 (dd,  $J_1 = 16.0$  Hz,  $J_2 = 6.4$  Hz, 1H), 4.40 (q,  $J = 7.2$  Hz, 2H), 4.33 (q,  $J = 7.2$  Hz, 2H), 3.68 (s, 1H), 2.97-2.86 (m, 2H), 2.75-2.68 (m, 1H), 2.64-2.57 (m, 1H), 2.06-1.97 (m, 1H), 1.90-1.80 (m, 1H), 1.40 (t,  $J = 7.2$  Hz, 3H), 1.37 (t,  $J = 7.2$  Hz, 3H);  $^{13}\text{C}$  NMR (100 MHz,  $\text{CDCl}_3$ )  $\delta$  167.1, 162.0, 149.4, 140.7, 139.1, 128.4, 128.2, 126.1, 123.9, 117.5, 109.2, 64.5, 60.7, 35.7, 33.8, 32.3, 30.5, 14.3, 14.2; **HRMS** (ESI): calculated for  $\text{C}_{21}\text{H}_{24}\text{NO}_6^+$ ,  $[\text{M}+\text{H}]^+$  386.1598, Found

386.1592.

$[\alpha]_D^{25} = -15.4$  ( $c = 1.0$  in  $\text{CHCl}_3$ ); **HPLC analysis:** 93% ee, [CHIRALPAK AD column; 1.0 mL/min; solvent system: hexane/*i*-PrOH = 90:10; retention times: 31.8 min (minor), 37.1 min (major)].

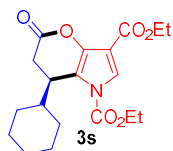

**3s**, Prepared according to the general procedure in 0.1 mmol scale, 67% yield, 24.3mg, colorless oil.

**$^1\text{H NMR}$**  (400 MHz,  $\text{CDCl}_3$ )  $\delta$  7.77 (d,  $J = 1.2$  Hz, 1H), 4.50-4.41 (m, 2H), 4.36-4.30 (m, 2H), 3.49 (dd,  $J_1 = 8.0$  Hz,  $J_2 = 4.0$  Hz, 1H), 2.91 (d,  $J = 16.8$  Hz, 1H), 2.75 (dd,  $J_1 = 16.4$  Hz,  $J_2 = 8.0$  Hz, 1H), 1.75-1.54 (m, 7H), 1.44 (t,  $J = 7.2$  Hz, 3H), 1.36 (t,  $J = 7.2$  Hz, 3H), 1.23 (t,  $J = 9.6$  Hz, 2H), 1.11 (t,  $J = 10.4$  Hz, 2H);  **$^{13}\text{C NMR}$**  (100 MHz,  $\text{CDCl}_3$ )  $\delta$  1167.9, 162.1, 149.5, 135.6, 124.0, 116.8, 109.1, 64.4, 60.6, 41.8, 36.2, 31.1, 30.4, 27.7, 26.4, 26.2, 26.0, 14.3, 14.1; **HRMS** (ESI): calculated for  $\text{C}_{19}\text{H}_{25}\text{NNaO}_6^+$ ,  $[\text{M}+\text{Na}]^+$  386.1574, Found 386.1570.

$[\alpha]_D^{25} = -11.0$  ( $c = 1.0$  in  $\text{CHCl}_3$ ); **HPLC analysis:** 96% ee, [CHIRALPAK AD column; 1.0 mL/min; solvent system: hexane/*i*-PrOH = 95:5; retention times: 11.6 min (minor), 12.6 min (major)].

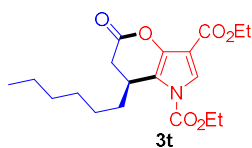

**3t**, Prepared according to the general procedure in 0.1 mmol scale, 55% yield, 20.1mg, colorless oil.

**$^1\text{H NMR}$**  (400 MHz,  $\text{CDCl}_3$ )  $\delta$  7.74 (s, 1H), 4.45 (q,  $J = 7.2$  Hz, 2H), 4.33 (q,  $J = 7.2$  Hz, 2H), 3.62-3.57 (m, 1H), 2.86 (d,  $J = 4.0$  Hz, 2H), 1.69-1.62 (m, 1H), 1.52-1.50 (m, 1H), 1.44 (t,  $J = 7.2$  Hz, 3H), 1.36 (t,  $J = 7.2$  Hz, 3H), 1.25 (bs, 8H), 0.86 (t,  $J = 5.6$  Hz, 3H);  **$^{13}\text{C NMR}$**  (100 MHz,  $\text{CDCl}_3$ )  $\delta$  167.3, 162.1, 149.4, 139.0, 123.7, 118.1, 123.7, 118.1, 109.2, 64.5, 60.7, 34.3, 33.9, 31.6, 30.8, 26.0, 22.6, 14.3, 14.2, 14.0; **HRMS** (ESI): calculated for  $\text{C}_{19}\text{H}_{27}\text{NNaO}_6^+$ ,  $[\text{M}+\text{Na}]^+$  388.1731, Found 388.1730.

$[\alpha]_D^{25} = -7.8$  ( $c = 1.0$  in  $\text{CHCl}_3$ ); **HPLC analysis:** 98% ee, [CHIRALPAK AD column; 0.8 mL/min; solvent system: hexane/*i*-PrOH = 98:2; retention times: 33.4 min (minor), 3.8 min (major)].

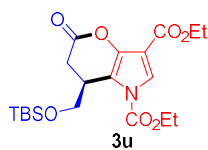

**3u**, Prepared according to the general procedure in 0.1 mmol scale, 85% yield, 36.2 mg, light yellow

oil. **<sup>1</sup>H NMR** (400 MHz, CDCl<sub>3</sub>) δ 7.76 (s, 1H), 4.48-4.43 (m, 2H), 4.38-4.28 (m, 2H), 3.75 (d, *J* = 2.0 Hz, 2H), 3.69-3.67 (m, 1H), 2.87 (d, *J* = 6.4 Hz, 2H), 1.44 (t, *J* = 7.2 Hz, 3H), 1.35 (t, *J* = 7.2 Hz, 3H), 0.81 (s, 9H), -0.06 (s, 3H), -0.14 (s, 3H). **<sup>13</sup>C NMR** (100 MHz, CDCl<sub>3</sub>) δ 166.9, 162.1, 149.5, 140.9, 123.8, 114.2, 109.4, 65.0, 64.4, 60.6, 34.2, 32.7, 25.6, 18.1, 14.3, 14.1, -5.9, -6.1; **HRMS** (ESI): calculated for C<sub>20</sub>H<sub>31</sub>NNaO<sub>7</sub>Si<sup>+</sup>, [M+Na]<sup>+</sup> 448.1762, Found 448.1758.

[α]<sub>D</sub><sup>25</sup> = -15.0 (c = 1.0 in CHCl<sub>3</sub>); **HPLC analysis**: 97% ee, [CHIRALPAK AD column; 1.0 mL/min; solvent system: hexane/*i*-PrOH = 80:20; retention times: 5.0 min (minor), 6.3 min (major)].

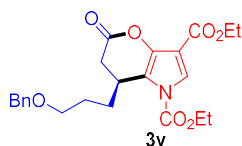

**3v**, Prepared according to the general procedure in 0.1 mmol scale, 64% yield, 27.5 mg, light yellow oil; **<sup>1</sup>H NMR** (400 MHz, CDCl<sub>3</sub>) δ 7.74 (s, 1H), 7.35 – 7.26 (m, 5H), 4.46-4.40 (m, 4H), 4.33 (q, *J* = 7.2 Hz, 2H), 3.66 – 3.65 (m, 1H), 3.44 (t, *J* = 5.6 Hz, 2H), 2.92-2.83 (m, 2H), 1.81-1.73 (m, 1H), 1.72-1.56 (m, 3H), 1.41 (t, *J* = 7.2 Hz, 3H), 1.36 (t, *J* = 7.2 Hz, 3H). **<sup>13</sup>C NMR** (100 MHz, CDCl<sub>3</sub>) δ 167.2, 162.0, 149.3, 139.0, 138.3, 128.3, 127.6, 127.5, 123.8, 117.6, 109.2, 72.9, 69.8, 64.5, 60.7, 34.0, 31.1, 30.6, 26.2, 14.3, 14.1; **HRMS** (ESI): calculated for C<sub>23</sub>H<sub>27</sub>NNaO<sub>7</sub><sup>+</sup>, [M+Na]<sup>+</sup> 452.1680, Found 452.1677.

[α]<sub>D</sub><sup>25</sup> = -24.2 (c = 1.0 in CHCl<sub>3</sub>); **HPLC analysis**: 96% ee, [CHIRALPAK AD column; 1.0 mL/min; solvent system: hexane/*i*-PrOH = 90:10; retention times: 29.0 min (minor), 50.6 min (major)].

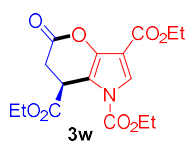

**3w**, Prepared according to the general procedure in 0.1 mmol scale, 65% yield, 23.0 mg, light yellow oil; **<sup>1</sup>H NMR** (400 MHz, CDCl<sub>3</sub>) δ 7.81 (s, 1H), 4.48-4.43 (m, 3H), 4.34 (q, *J* = 7.2 Hz, 2H), 4.17 (q, *J* = 7.2 Hz, 2H), 3.18 (dd, *J*<sub>1</sub> = 16.4, *J*<sub>2</sub> = 2.0 Hz, 1H), 3.05 (dd, *J*<sub>1</sub> = 16.4, *J*<sub>2</sub> = 8.4 Hz, 1H), 1.43 (t, *J* = 7.2 Hz, 3H), 1.37 (t, *J* = 7.2 Hz, 3H), 1.24 (t, *J* = 7.2 Hz, 3H); **<sup>13</sup>C NMR** (100 MHz, CDCl<sub>3</sub>) δ 170.0, 164.8, 161.8, 149.3, 140.6, 124.6, 110.6, 109.2, 64.8, 62.0, 60.8, 37.1, 31.7, 14.3, 14.1, 14.0; **HRMS** (ESI): calculated for C<sub>16</sub>H<sub>19</sub>NNaO<sub>8</sub><sup>+</sup>, [M+Na]<sup>+</sup> 376.1003, Found 376.1005.

[α]<sub>D</sub><sup>25</sup> = 24.6 (c = 1.0 in CHCl<sub>3</sub>); **HPLC analysis**: 97% ee, [CHIRALPAK AD column; 1.0 mL/min; solvent system: hexane/*i*-PrOH = 90:10; retention times: 15.7 min (minor), 17.7 min (major)].



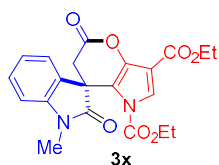

**3x**, Prepared according to the general procedure in 0.1 mmol scale, 64% yield, 26.4 mg, brown oil; **<sup>1</sup>H NMR** (400 MHz, CDCl<sub>3</sub>)  $\delta$  7.77 (s, 1H), 7.36-7.31 (m, 1H), 7.02 (d,  $J$  = 4.0 Hz, 2H), 6.93 (d,  $J$  = 8.0 Hz, 1H), 4.40-4.35 (m, 2H), 4.30-4.12 (m, 2H), 3.36 (d,  $J$  = 15.6 Hz, 1H), 3.30 (s, 3H), 2.66 (d,  $J$  = 16.0 Hz, 1H), 1.39 (t,  $J$  = 7.2 Hz, 3H), 1.25 (t,  $J$  = 7.2 Hz, 3H); **<sup>13</sup>C NMR** (100 MHz, CDCl<sub>3</sub>)  $\delta$  175.7, 164.8, 148.5, 142.8, 142.6, 129.5, 129.4, 125.3, 123.1, 122.7, 109.3, 108.8, 64.7, 60.9, 47.5, 39.8, 26.9, 14.3, 13.9; **HRMS** (ESI): calculated for C<sub>21</sub>H<sub>20</sub>N<sub>2</sub>NaO<sub>7</sub><sup>+</sup>, [M+Na]<sup>+</sup> 435.1163, Found 435.1160.

[ $\alpha$ ]<sub>D</sub><sup>25</sup> = 170.4 (c = 1.0 in CHCl<sub>3</sub>); **HPLC analysis**: 90% ee, [CHIRALPAK AD column; 1.0 mL/min; solvent system: hexane/*i*-PrOH = 90:10; retention times: 24.1 min (minor), 29.9 min (major)].

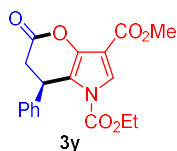

**3y**, Prepared according to the general procedure in 0.1 mmol scale, 79% yield, 27.1 mg, light yellow oil; **<sup>1</sup>H NMR** (400 MHz, CDCl<sub>3</sub>)  $\delta$  7.85 (s, 1H), 7.32-7.22 (m, 3H), 7.07 (d,  $J$  = 7.2 Hz, 2H), 4.83 (d,  $J$  = 7.2 Hz, 1H), 4.35-4.27 (m, 2H), 3.90 (s, 3H), 3.24 (dd,  $J_1$  = 16.0 Hz,  $J_2$  = 8.0 Hz, 1H), 2.95 (dd,  $J_1$  = 16.0 Hz,  $J_2$  = 1.6 Hz, 1H), 1.27 (t,  $J$  = 7.2 Hz, 3H); **<sup>13</sup>C NMR** (100 MHz, CDCl<sub>3</sub>)  $\delta$  161.2, 161.0, 149.1, 148.2, 147.8, 136.9, 131.6, 129.6, 128.9, 126.4, 115.5, 110.2, 109.1, 65.1, 61.2, 14.4, 13.5; **HRMS** (ESI): calculated for C<sub>18</sub>H<sub>18</sub>NO<sub>6</sub><sup>+</sup>, [M+H]<sup>+</sup> 344.1129, Found 344.1127.

[ $\alpha$ ]<sub>D</sub><sup>25</sup> = -101 (c = 1.0 in EtOAc); **HPLC analysis**: 95% ee, [CHIRALPAK IA column; 1.0 mL/min; solvent system: hexane/*i*-PrOH = 90:10; retention times: 13.1 min (minor), 14.9 min (major)].

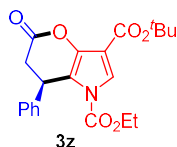

**3z**, Prepared according to the general procedure in 0.1 mmol scale, 81% yield, 31.2 mg, light yellow oil; **<sup>1</sup>H NMR** (400 MHz, CDCl<sub>3</sub>)  $\delta$  7.73 (s, 1H), 7.31-7.21 (m, 3H), 7.07 (d,  $J$  = 7.2 Hz, 2H), 4.80 (d,  $J$  = 7.6 Hz, 1H), 4.34-4.25 (m, 2H), 3.23 (dd,  $J_1$  = 16.0 Hz,  $J_2$  = 8.0 Hz, 1H), 2.95 (dd,  $J_1$  = 16.0 Hz,  $J_2$  = 0.8 Hz, 1H), 1.59 (s, 9H), 1.25 (t,  $J$  = 7.2 Hz, 3H); **<sup>13</sup>C NMR** (100 MHz, CDCl<sub>3</sub>)  $\delta$  165.8, 161.2, 149.2, 140.7, 140.5, 129.1, 127.5, 126.5, 124.0, 81.5, 64.4, 37.8, 36.8, 28.2, 13.9; **HRMS**

(ESI): calculated for  $C_{21}H_{24}NO_6^+$ ,  $[M+H]^+$  386.1598, Found 386.1594.

$[\alpha]_D^{25} = -65$  ( $c = 1.0$  in EtOAc); **HPLC analysis:** 96% ee, [CHIRALPAK IA column; 1.0 mL/min; solvent system: hexane/*i*-PrOH = 90:10; retention times: 13.5 min (minor), 14.5 min (major)].

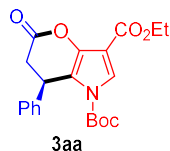

**3aa**, Prepared according to the general procedure in 0.1 mmol scale, 83% yield, 32.0 mg, light yellow oil;  **$^1H$  NMR** (400 MHz,  $CDCl_3$ )  $\delta$  7.80 (s, 1H), 7.30-7.21 (m, 3H), 7.04 (d,  $J = 7.6$  Hz, 2H), 4.82 (d,  $J = 7.6$  Hz, 1H), 4.39-4.32 (m, 2H), 3.25 (dd,  $J_1 = 16.0$  Hz,  $J_2 = 8.0$  Hz, 1H), 2.98 (d,  $J = 16.0$  Hz, 1H), 1.43 (s, 9H), 1.39 (t,  $J = 7.2$  Hz, 3H);  **$^{13}C$  NMR** (100 MHz,  $CDCl_3$ )  $\delta$  166.0, 162.2, 147.6, 140.6, 140.1, 129.0, 127.5, 126.6, 124.6, 115.2, 108.6, 86.0, 60.7, 38.0, 36.7, 27.7, 14.3; **HRMS** (ESI): calculated for  $C_{21}H_{24}NO_6^+$ ,  $[M+H]^+$  386.1598, Found 386.1596.

$[\alpha]_D^{25} = -83$  ( $c = 1.0$  in EtOAc); **HPLC analysis:** 93% ee, [CHIRALPAK AD column; 1.0 mL/min; solvent system: hexane/*i*-PrOH = 90:10; retention times: 7.9 min (minor), 9.3 min (major)].

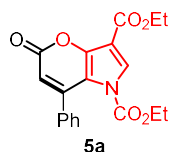

**5a**, Prepared according to the general procedure in 0.1 mmol scale, 88% yield, 31.3 mg, white solid, m.p. 165.2-167.4 °C;  **$^1H$  NMR** (400 MHz,  $CDCl_3$ )  $\delta$  8.11 (s, 1H), 7.48-7.47 (m, 3H), 7.39-7.37 (m, 2H), 6.13 (s, 1H), 4.42 (q,  $J = 7.2$  Hz, 2H), 3.81 (q,  $J = 7.2$  Hz, 2H), 1.42 (t,  $J = 7.2$  Hz, 3H), 0.94 (t,  $J = 7.2$  Hz, 3H);  **$^{13}C$  NMR** (100 MHz,  $CDCl_3$ )  $\delta$  165.9, 162.5, 149.1, 140.6, 140.1, 129.2, 127.7, 126.5, 124.6, 115.8, 108.9, 64.5, 51.9, 37.8, 36.8, 14.0; **HRMS** (ESI): calculated for  $C_{19}H_{18}NO_6^+$ ,  $[M+H]^+$  356.1129, Found 356.1126.

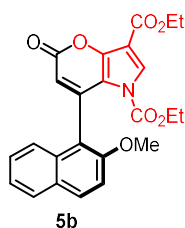

**5b**, Prepared according to the general procedure in 0.1 mmol scale, 62% yield, 27.0 mg, white solid, m.p. 101.4-103.3 °C;  **$^1H$  NMR** (400 MHz,  $CDCl_3$ )  $\delta$  8.07 (s, 1H), 7.94 (d,  $J = 9.2$  Hz, 1H), 7.85 (d,  $J = 8.0$  Hz, 1H), 7.67 (d,  $J = 8.4$  Hz, 1H), 7.45-7.41 (m, 1H), 7.39-7.37 (m, 1H), 7.31 (d,  $J = 8.8$  Hz,

1H), 6.18 (s, 1H), 4.44 (q,  $J = 7.2$  Hz, 2H), 3.83 (s, 3H), 3.80-3.72 (m, 1H), 3.31-3.23 (m, 1H), 1.43 (t,  $J = 7.2$  Hz, 3H), 0.60 (t,  $J = 7.2$  Hz, 3H);  $^{13}\text{C}$  NMR (100 MHz,  $\text{CDCl}_3$ )  $\delta$  161.5, 161.1, 152.7, 148.7, 147.3, 144.3, 131.6, 130.7, 130.6, 128.9, 128.2, 127.6, 124.1, 124.0, 119.5, 117.1, 113.2, 112.3, 108.3, 64.6, 61.1, 56.4, 14.4; **HRMS** (ESI): calculated for  $\text{C}_{24}\text{H}_{22}\text{NO}_7^+$ ,  $[\text{M}+\text{H}]^+$  436.1391, Found 436.1388.

$[\alpha]^{25}_{\text{D}} = -54$  ( $c = 1.0$  in EtOAc); **HPLC analysis**: 53% ee, [CHIRALPAK OD column; 1.0 mL/min; solvent system: hexane/*i*-PrOH = 80:20; retention times: 23.7 min (minor), 26.5 min (major)].

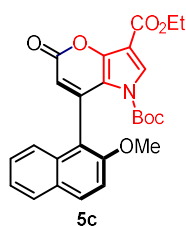

**5c**, Prepared according to the general procedure in 0.1 mmol scale, 55% yield, 25.4 mg, white solid, m.p. 59.6-61.2 °C;  $^1\text{H}$  NMR (400 MHz,  $\text{CDCl}_3$ )  $\delta$  7.95 (s, 1H), 7.93 (d,  $J = 9.2$  Hz, 1H), 7.83 (d,  $J = 7.2$  Hz, 1H), 7.61 (d,  $J = 8.4$  Hz, 1H), 7.45-7.41 (m, 1H), 7.39-7.35 (d,  $J = 9.2$  Hz, 1H), 6.20 (s, 1H), 4.44 (q,  $J = 7.2$  Hz, 2H), 3.86 (s, 3H), 1.44 (t,  $J = 7.2$  Hz, 3H), 1.02 (s, 9H);  $^{13}\text{C}$  NMR (100 MHz,  $\text{CDCl}_3$ )  $\delta$  161.8, 161.4, 153.1, 147.1, 146.5, 144.2, 131.6, 130.8, 130.5, 129.0, 128.3, 127.5, 124.0, 119.1, 117.1, 113.0, 112.5, 86.0, 61.0, 56.3, 27.0, 14.4; **HRMS** (ESI): calculated for  $\text{C}_{26}\text{H}_{26}\text{NO}_7^+$ ,  $[\text{M}+\text{H}]^+$  464.1704, Found 464.1701.

$[\alpha]^{25}_{\text{D}} = -119$  ( $c = 1.0$  in EtOAc); **HPLC analysis**: 70% ee, [CHIRALPAK IA column; 1.0 mL/min; solvent system: hexane/*i*-PrOH = 97:3; retention times: 60.3 min (minor), 65.3 min (major)].

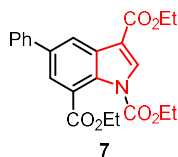

**7**, Prepared according to the general procedure in 0.1 mmol scale, 40% yield, 16.4 mg, yellow solid, m.p. 109.1-109.5 °C;  $^1\text{H}$  NMR (600 MHz,  $\text{CDCl}_3$ )  $\delta$  8.56 (d,  $J = 1.2$  Hz, 1H), 8.30 (s, 1H), 7.89 (d,  $J = 1.2$  Hz, 1H), 7.69 (d,  $J = 1.8$  Hz, 2H), 7.46 (t,  $J = 7.8$  Hz, 2H), 7.37 (t,  $J = 7.2$  Hz, 1H), 4.48 (q,  $J = 7.2$  Hz, 2H), 4.44-4.39 (m, 4H), 1.45 (q,  $J = 7.2$  Hz, 6H), 1.38 (t,  $J = 7.2$  Hz, 3H);  $^{13}\text{C}$  NMR (150 MHz,  $\text{CDCl}_3$ )  $\delta$  167.6, 163.6, 150.1, 140.2, 137.5, 133.9, 131.1, 129.6, 128.8, 127.4, 127.38, 125.4, 122.9, 121.6, 113.2, 64.5, 61.3, 60.5, 14.4, 14.2, 14.1; **HRMS** (ESI): calculated for  $\text{C}_{23}\text{H}_{24}\text{NO}_6^+$ ,  $[\text{M}+\text{H}]^+$  410.1598, Found 410.1584.

#### Part 4: HPLC spectra for all products

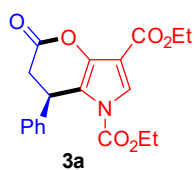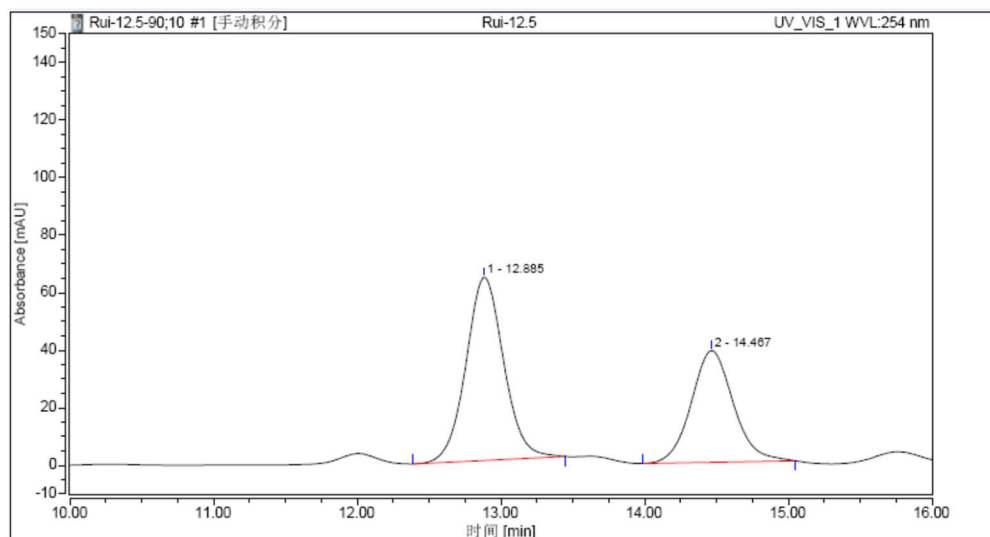

| Peak  | Ret. Time (min) | Area (mAu*min) | Height (mAu) | Area (%) | Height (%) |
|-------|-----------------|----------------|--------------|----------|------------|
| 1     | 12.885          | 19.385         | 63.651       | 59.56    | 62.12      |
| 2     | 14.467          | 13.160         | 38.806       | 40.44    | 37.88      |
| Total |                 | 32.546         | 102.458      | 100.00   | 100.0      |

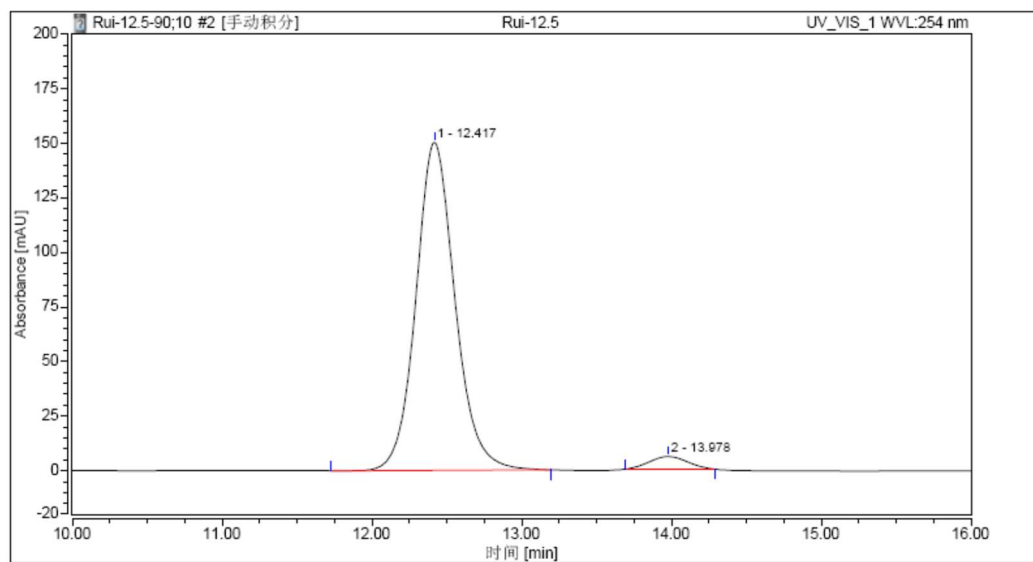

| Peak  | Ret. Time (min) | Area (mAu*min) | Height (mAu) | Area (%) | Height (%) |
|-------|-----------------|----------------|--------------|----------|------------|
| 1     | 12.417          | 45.512         | 150.357      | 96.36    | 96.28      |
| 2     | 13.978          | 1.719          | 5.82         | 3.64     | 3.72       |
| Total |                 | 47.231         | 156.159      | 100.00   | 100.0      |

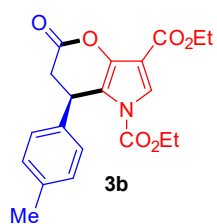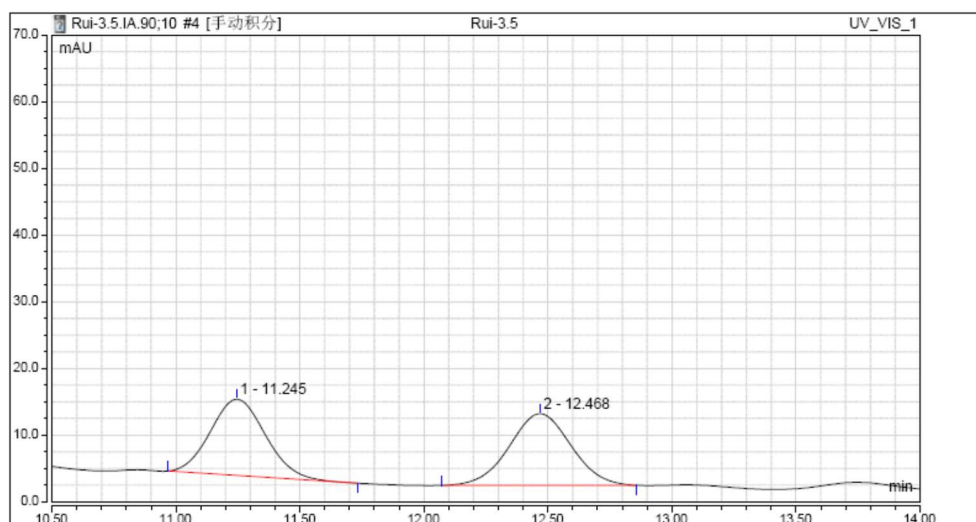

| Peak  | Ret. Time (min) | Area (mAu*min) | Height (mAu) | Area (%) | Height (%) |
|-------|-----------------|----------------|--------------|----------|------------|
| 1     | 11.254          | 2.935          | 11.420       | 48.64    | 51.53      |
| 2     | 12.468          | 3.100          | 10.742       | 51.36    | 48.47      |
| Total |                 | 6.035          | 22.161       | 100.00   | 100.0      |

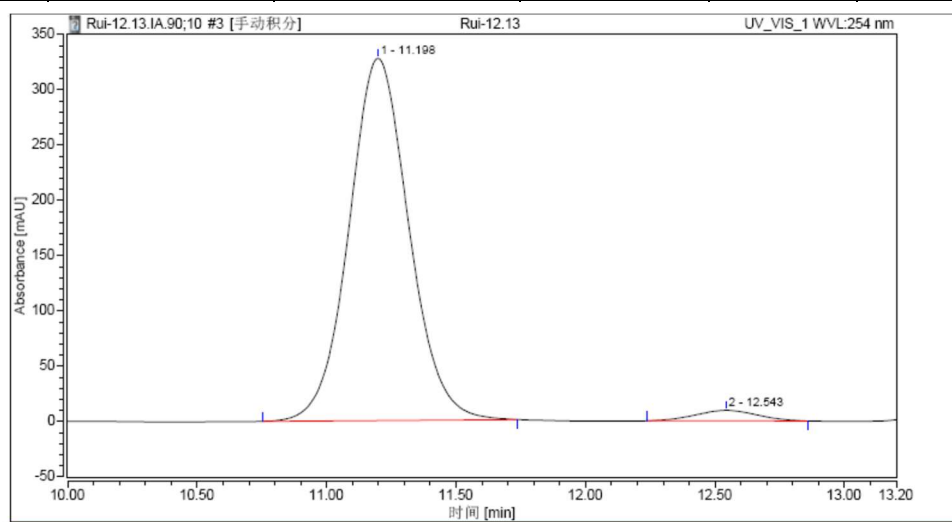

| Peak  | Ret. Time (min) | Area (mAu*min) | Height (mAu) | Area (%) | Height (%) |
|-------|-----------------|----------------|--------------|----------|------------|
| 1     | 11.198          | 87.789         | 327.357      | 97.10    | 97.19      |
| 2     | 12.543          | 2.621          | 9.456        | 2.9      | 2.81       |
| Total |                 | 90.410         | 336.813      | 100.00   | 100.0      |

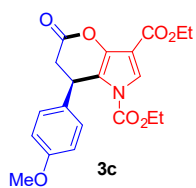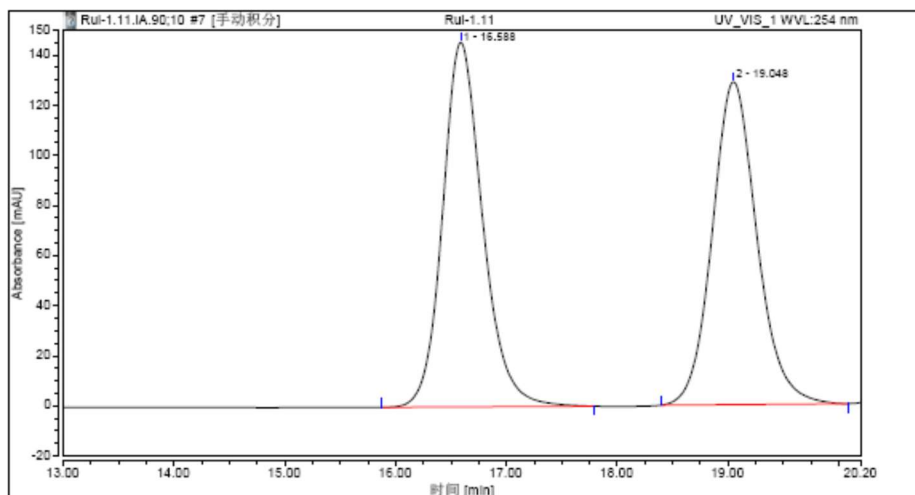

| Peak  | Ret. Time (min) | Area (mAu*min) | Height (mAu) | Area (%) | Height (%) |
|-------|-----------------|----------------|--------------|----------|------------|
| 1     | 16.588          | 61.104         | 145.509      | 50.38    | 53.04      |
| 2     | 19.048          | 60.176         | 128.812      | 49.62    | 46.96      |
| Total |                 | 121.279        | 274.321      | 100.00   | 100.00     |

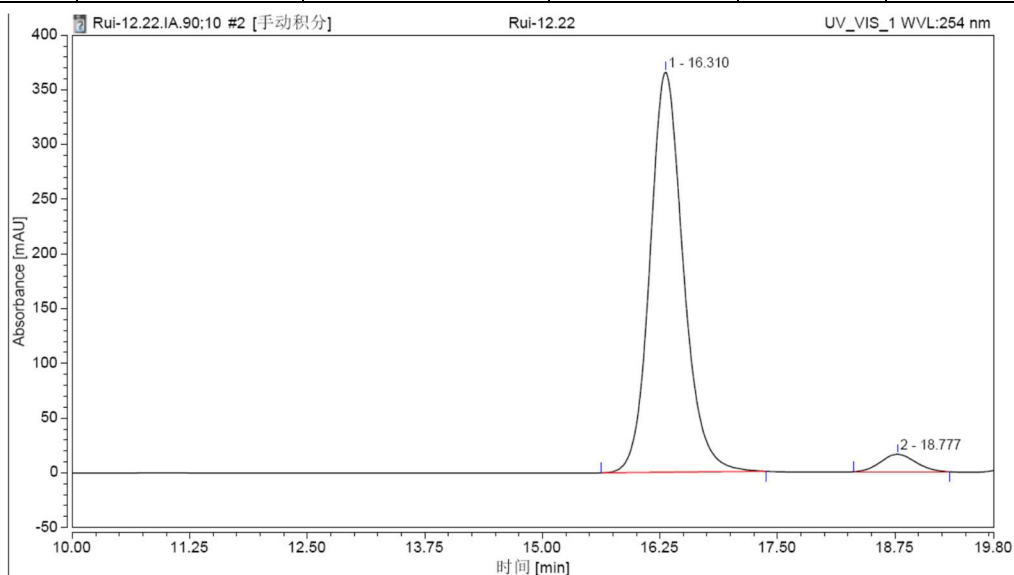

| Peak  | Ret. Time (min) | Area (mAu*min) | Height (mAu) | Area (%) | Height (%) |
|-------|-----------------|----------------|--------------|----------|------------|
| 1     | 16.310          | 150.109        | 365.732      | 95.58    | 95.80      |
| 2     | 18.777          | 6.936          | 16.024       | 4.42     | 4.20       |
| Total |                 | 157.044        | 381.756      | 100.00   | 100.00     |

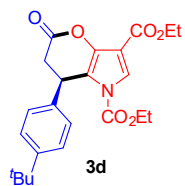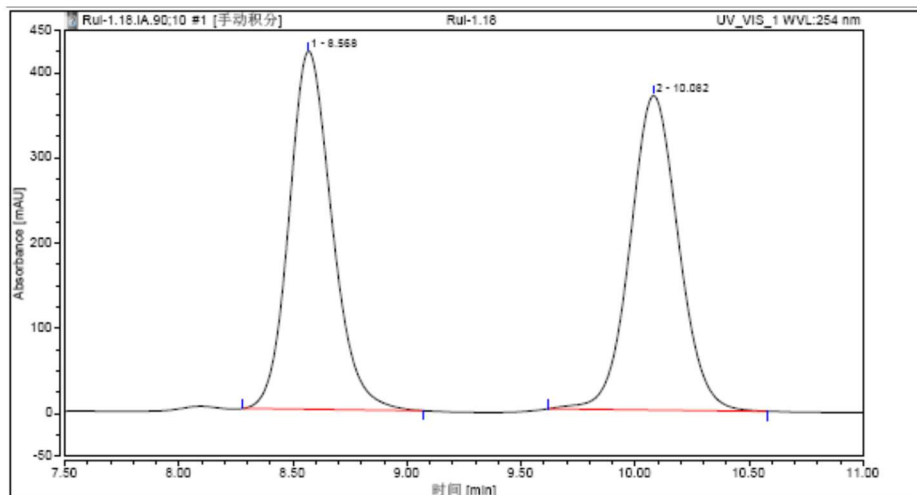

| Peak  | Ret. Time (min) | Area (mAu*min) | Height (mAu) | Area (%) | Height (%) |
|-------|-----------------|----------------|--------------|----------|------------|
| 1     | 8.568           | 91.710         | 420.637      | 50.22    | 53.25      |
| 2     | 10.082          | 90.908         | 369.245      | 49.78    | 46.75      |
| Total |                 | 182.617        | 789.882      | 100.00   | 100.00     |

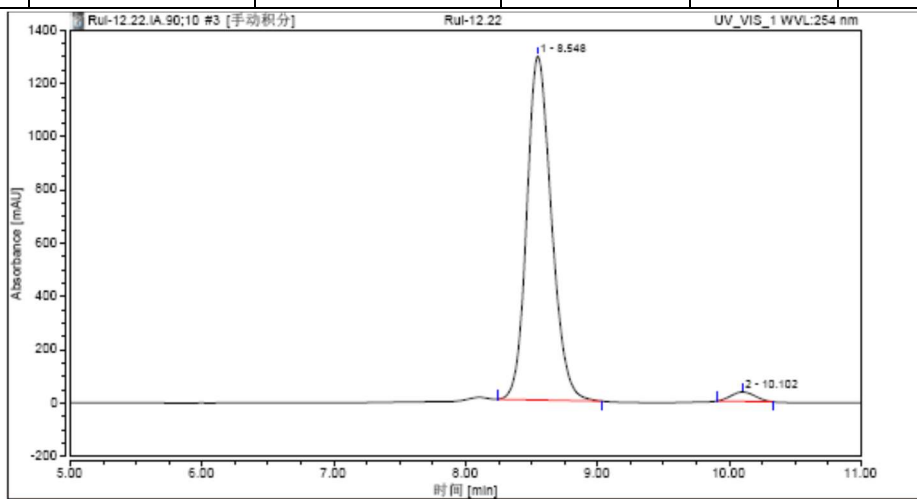

| Peak  | Ret. Time (min) | Area (mAu*min) | Height (mAu) | Area (%) | Height (%) |
|-------|-----------------|----------------|--------------|----------|------------|
| 1     | 8.548           | 280.159        | 1292.906     | 97.40    | 97.33      |
| 2     | 10.102          | 7.472          | 35.494       | 2.60     | 2.67       |
| Total |                 | 287.631        | 1328.400     | 100.00   | 100.00     |

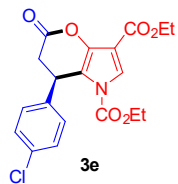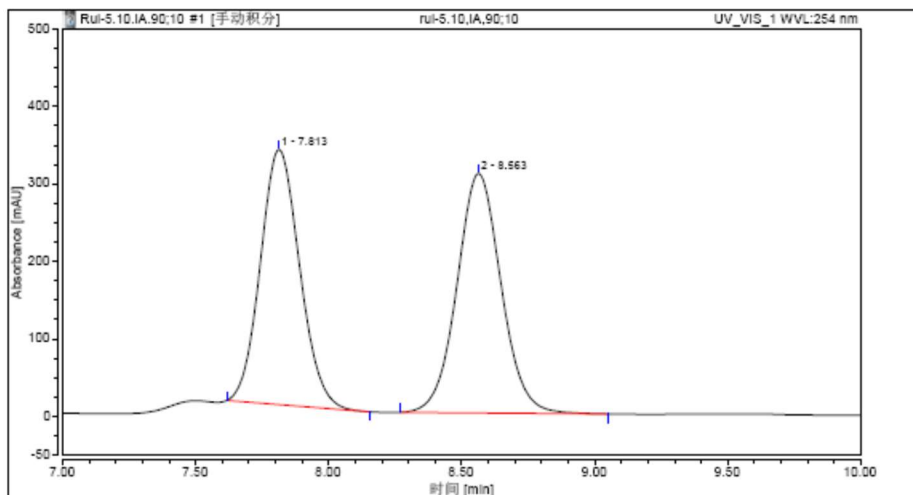

| Peak  | Ret. Time (min) | Area (mAu*min) | Height (mAu) | Area (%) | Height (%) |
|-------|-----------------|----------------|--------------|----------|------------|
| 1     | 7.813           | 56.316         | 329.314      | 48.66    | 51.58      |
| 2     | 8.563           | 59.421         | 309.197      | 51.34    | 48.42      |
| Total |                 | 115.737        | 638.511      | 100.00   | 100.00     |

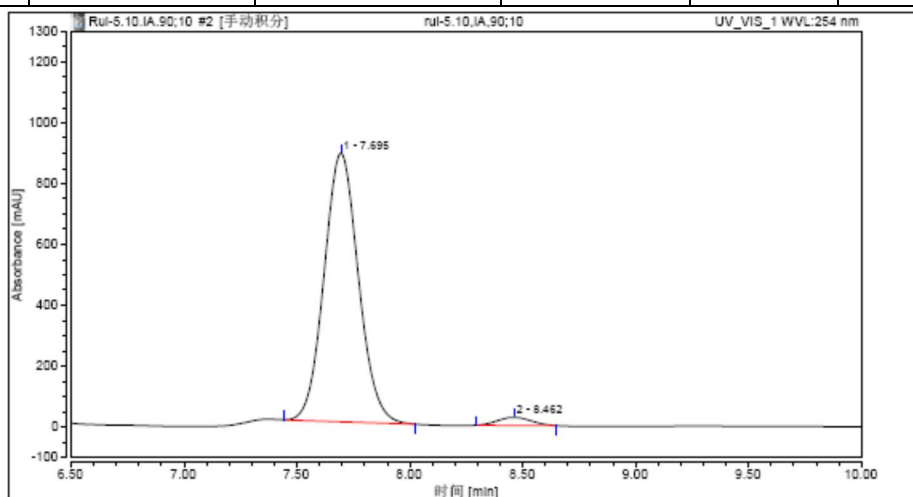

| Peak  | Ret. Time (min) | Area (mAu*min) | Height (mAu) | Area (%) | Height (%) |
|-------|-----------------|----------------|--------------|----------|------------|
| 1     | 7.695           | 155.420        | 882.974      | 97.16    | 97.08      |
| 2     | 8.462           | 4.547          | 26.524       | 2.84     | 2.92       |
| Total |                 | 159.967        | 909.498      | 100.00   | 100.00     |



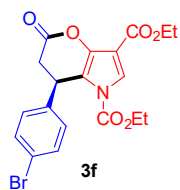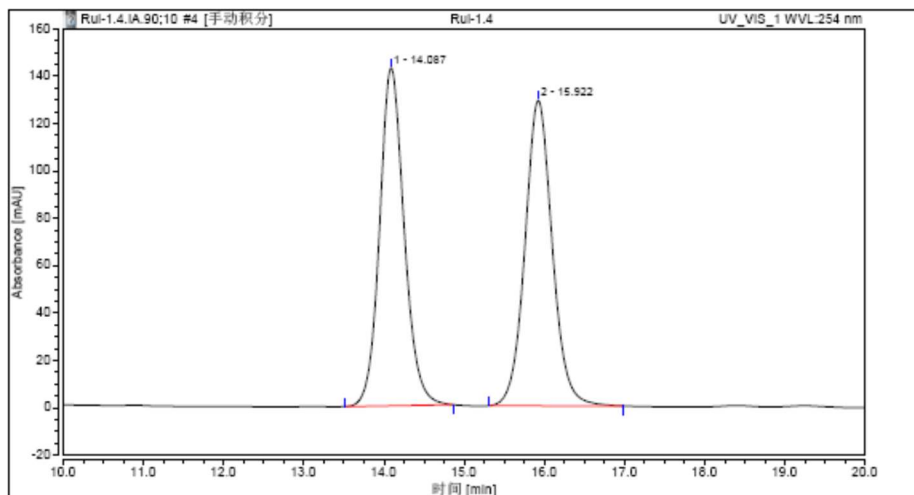

| Peak  | Ret. Time (min) | Area (mAu*min) | Height (mAu) | Area (%) | Height (%) |
|-------|-----------------|----------------|--------------|----------|------------|
| 1     | 14.087          | 50.717         | 142.891      | 49.89    | 52.54      |
| 2     | 15.922          | 50.947         | 129.084      | 50.11    | 47.46      |
| Total |                 | 101.663        | 271.976      | 100.00   | 100.00     |

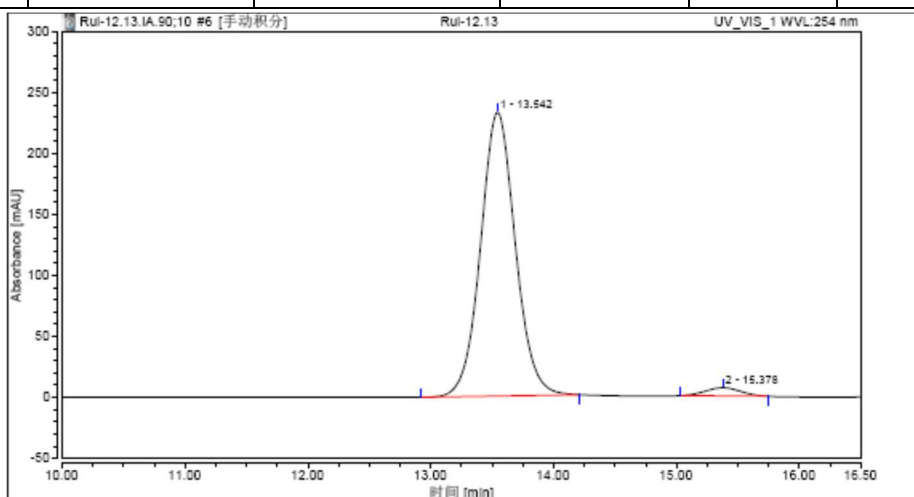

| Peak  | Ret. Time (min) | Area (mAu*min) | Height (mAu) | Area (%) | Height (%) |
|-------|-----------------|----------------|--------------|----------|------------|
| 1     | 13.542          | 76.274         | 232.732      | 97.15    | 97.18      |
| 2     | 15.378          | 2.234          | 5.742        | 2.85     | 2.82       |
| Total |                 | 78.508         | 239.474      | 100.00   | 100.00     |

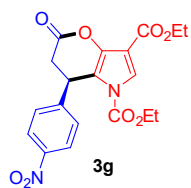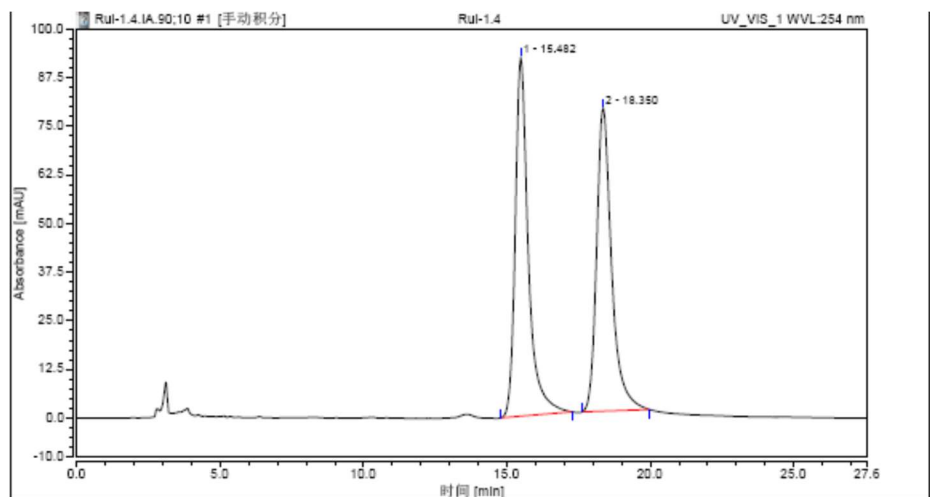

| Peak  | Ret. Time (min) | Area (mAu*min) | Height (mAu) | Area (%) | Height (%) |
|-------|-----------------|----------------|--------------|----------|------------|
| 1     | 15.482          | 48.671         | 92.335       | 50.84    | 54.22      |
| 2     | 18.350          | 47.068         | 77.973       | 49.16    | 45.78      |
| Total |                 | 95.739         | 170.307      | 100.00   | 100.00     |

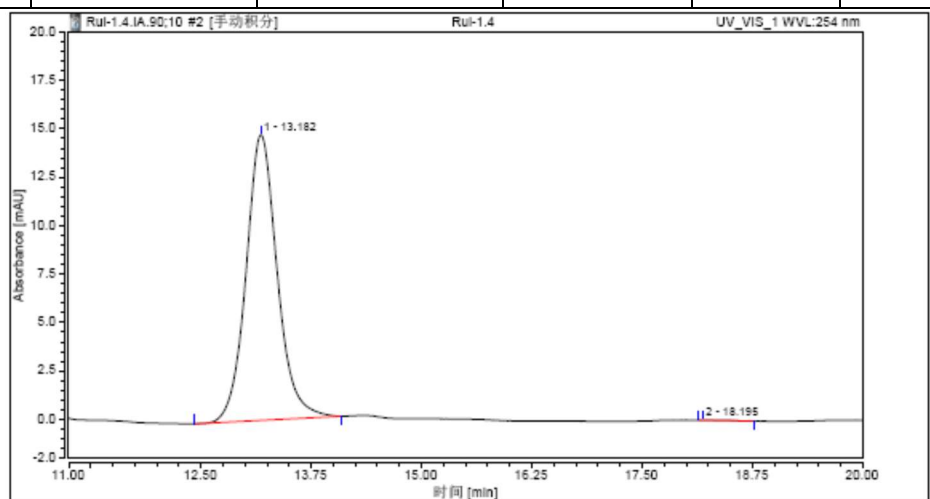

| Peak  | Ret. Time (min) | Area (mAu*min) | Height (mAu) | Area (%) | Height (%) |
|-------|-----------------|----------------|--------------|----------|------------|
| 1     | 13.182          | 6.033          | 14.757       | 99.92    | 99.94      |
| 2     | 18.195          | 0.005          | 0.009        | 0.08     | 0.06       |
| Total |                 | 6.038          | 14.766       | 100.00   | 100.00     |

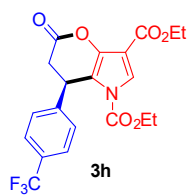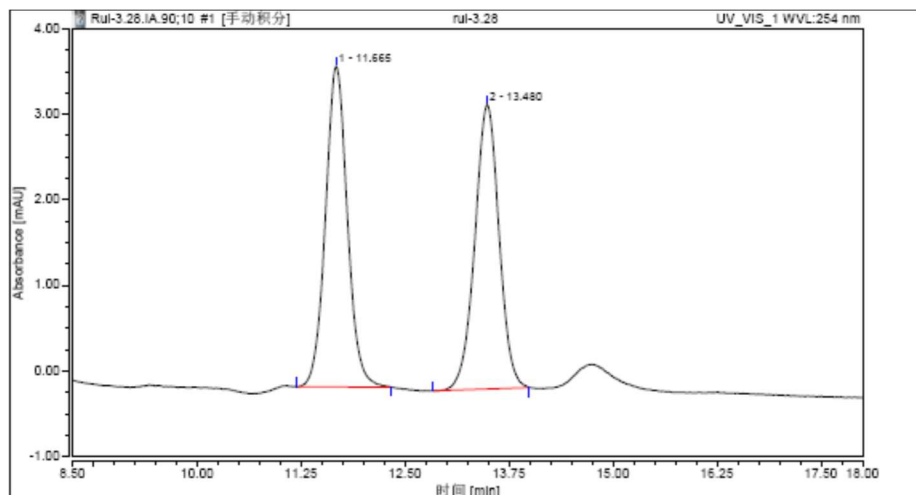

| Peak  | Ret. Time (min) | Area (mAu*min) | Height (mAu) | Area (%) | Height (%) |
|-------|-----------------|----------------|--------------|----------|------------|
| 1     | 11.665          | 1.145          | 3.751        | 50.51    | 52.98      |
| 2     | 13.480          | 1.122          | 3.328        | 49.49    | 47.02      |
| Total |                 | 2.268          | 7.079        | 100.00   | 100.00     |

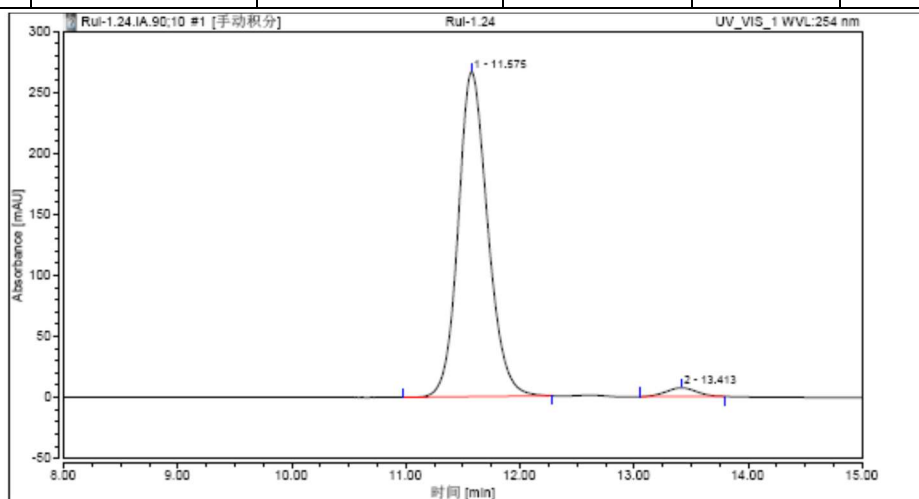

| Peak  | Ret. Time (min) | Area (mAu*min) | Height (mAu) | Area (%) | Height (%) |
|-------|-----------------|----------------|--------------|----------|------------|
| 1     | 11.575          | 79.987         | 266.461      | 97.30    | 97.40      |
| 2     | 13.413          | 2.222          | 7.118        | 2.70     | 2.60       |
| Total |                 | 82.209         | 273.579      | 100.00   | 100.00     |

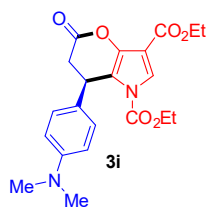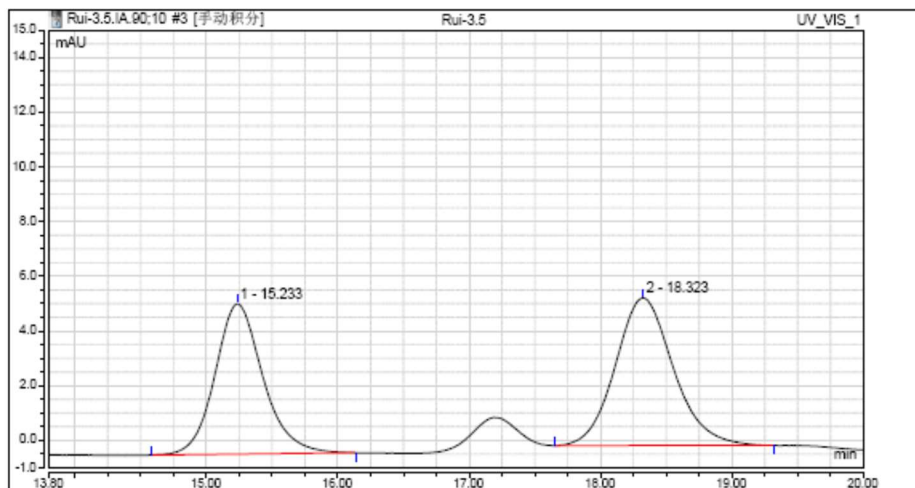

| Peak  | Ret. Time (min) | Area (mAu*min) | Height (mAu) | Area (%) | Height (%) |
|-------|-----------------|----------------|--------------|----------|------------|
| 1     | 15.233          | 2.321          | 5.493        | 45.64    | 50.44      |
| 2     | 18.323          | 2.765          | 5.397        | 54.36    | 49.56      |
| Total |                 | 5.086          | 10.890       | 100.00   | 100.00     |

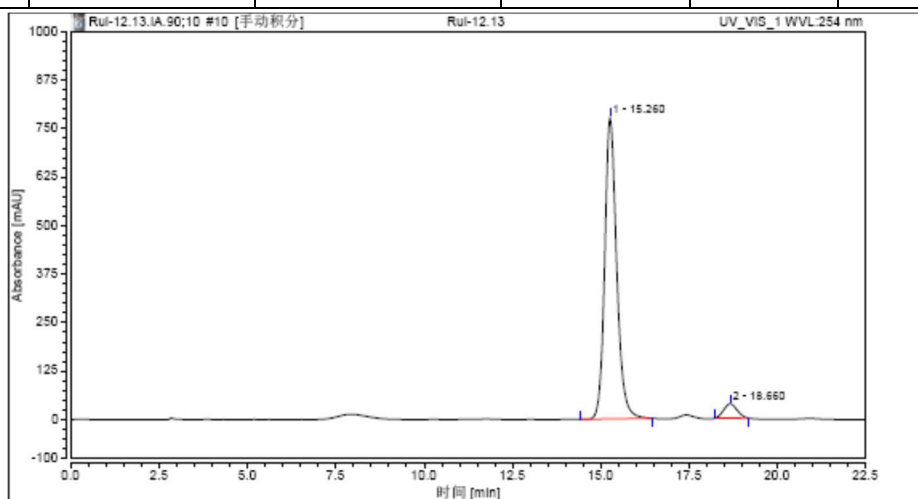

| Peak  | Ret. Time (min) | Area (mAu*min) | Height (mAu) | Area (%) | Height (%) |
|-------|-----------------|----------------|--------------|----------|------------|
| 1     | 15.260          | 304.683        | 777.452      | 94.93    | 95.45      |
| 2     | 18.660          | 16.289         | 37.034       | 5.07     | 4.55       |
| Total |                 | 320.971        | 814.486      | 100.00   | 100.00     |

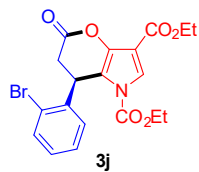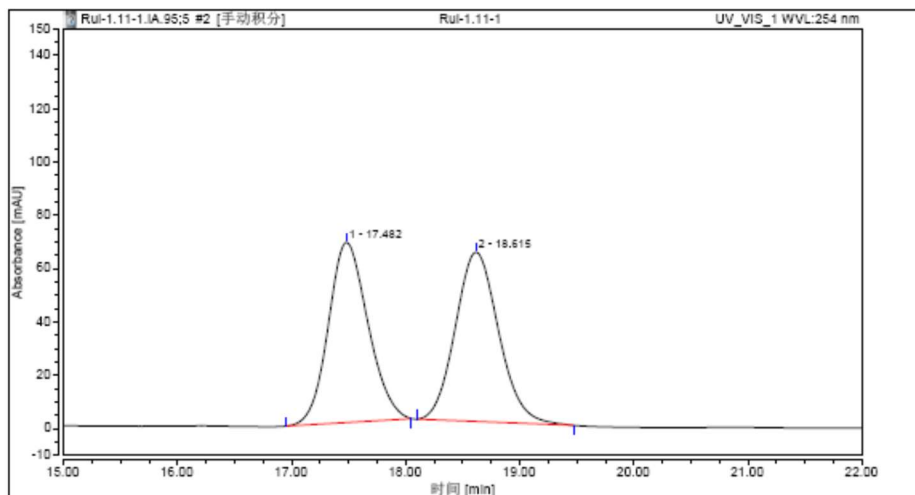

| Peak  | Ret. Time (min) | Area (mAu*min) | Height (mAu) | Area (%) | Height (%) |
|-------|-----------------|----------------|--------------|----------|------------|
| 1     | 17.482          | 27.211         | 67.630       | 49.35    | 51.56      |
| 2     | 18.615          | 27.929         | 63.544       | 50.65    | 48.44      |
| Total |                 | 55.141         | 131.174      | 100.00   | 100.00     |

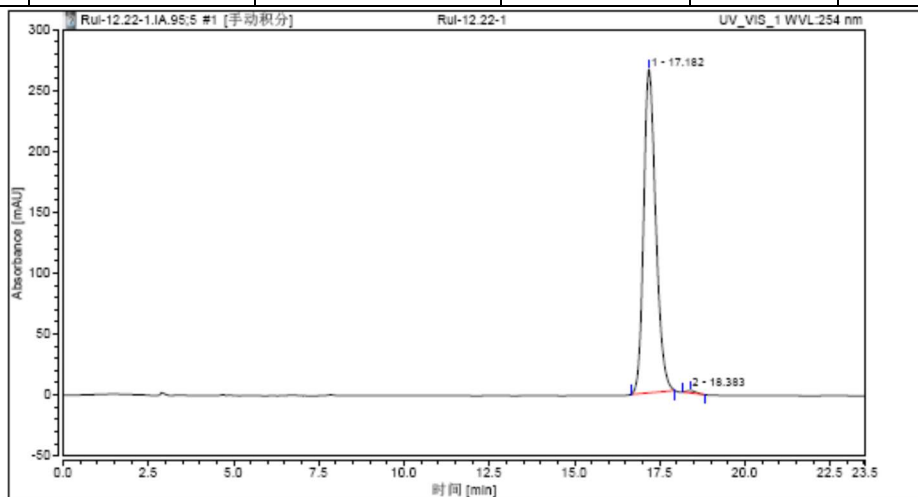

| Peak  | Ret. Time (min) | Area (mAu*min) | Height (mAu) | Area (%) | Height (%) |
|-------|-----------------|----------------|--------------|----------|------------|
| 1     | 17.182          | 109.881        | 265.998      | 99.45    | 99.32      |
| 2     | 18.383          | 0.608          | 1.827        | 0.55     | 0.68       |
| Total |                 | 110.489        | 267.824      | 100.00   | 100.00     |

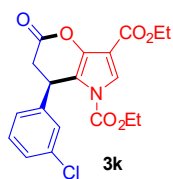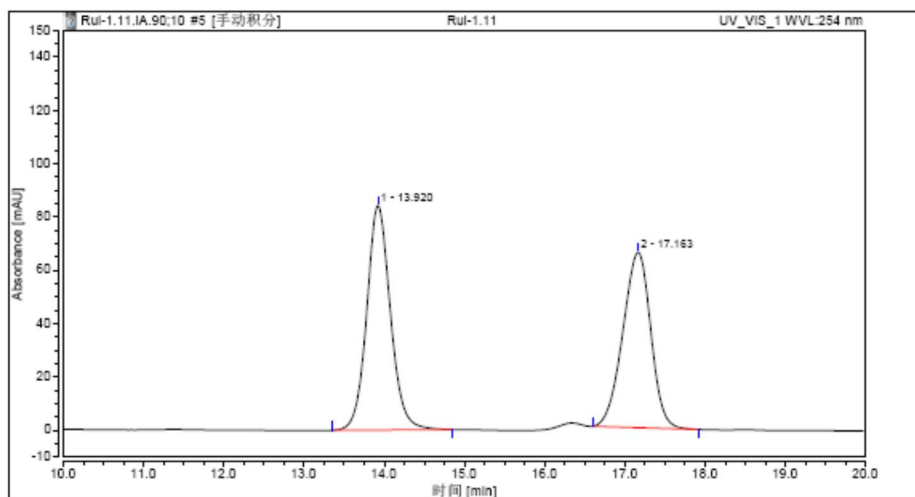

| Peak  | Ret. Time (min) | Area (mAu*min) | Height (mAu) | Area (%) | Height (%) |
|-------|-----------------|----------------|--------------|----------|------------|
| 1     | 13.920          | 28.810         | 84.242       | 52.04    | 56.14      |
| 2     | 17.163          | 26.555         | 65.817       | 47.96    | 43.86      |
| Total |                 | 55.365         | 150.059      | 100.00   | 100.00     |

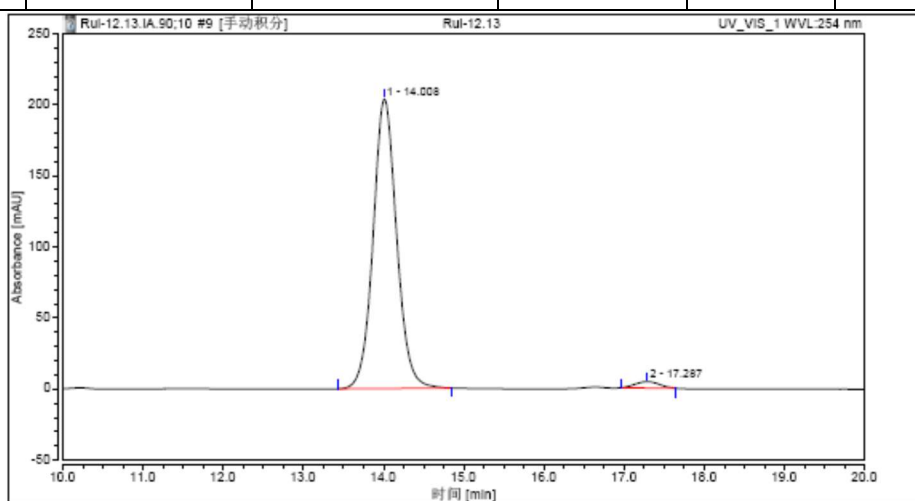

| Peak  | Ret. Time (min) | Area (mAu*min) | Height (mAu) | Area (%) | Height (%) |
|-------|-----------------|----------------|--------------|----------|------------|
| 1     | 14.008          | 69.105         | 203.698      | 97.82    | 97.85      |
| 2     | 17.287          | 1.540          | 4.470        | 2.18     | 2.15       |
| Total |                 | 70.645         | 208.168      | 100.00   | 100.00     |

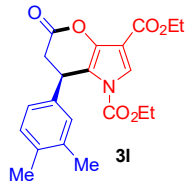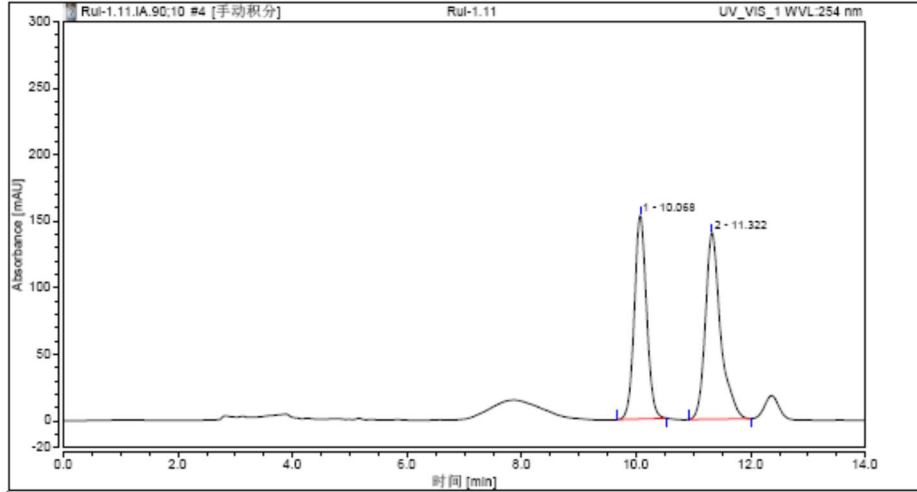

| Peak  | Ret. Time (min) | Area (mAu*min) | Height (mAu) | Area (%) | Height (%) |
|-------|-----------------|----------------|--------------|----------|------------|
| 1     | 10.068          | 37.681         | 153.237      | 46.57    | 52.22      |
| 2     | 11.322          | 43.239         | 140.227      | 53.43    | 47.78      |
| Total |                 | 80.920         | 293.464      | 100.00   | 100.00     |

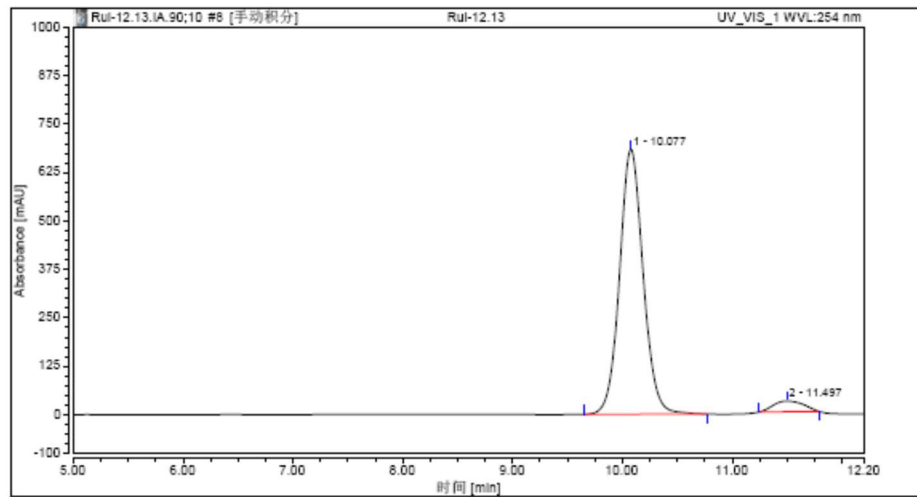

| Peak  | Ret. Time (min) | Area (mAu*min) | Height (mAu) | Area (%) | Height (%) |
|-------|-----------------|----------------|--------------|----------|------------|
| 1     | 10.077          | 170.350        | 685.008      | 95.05    | 96.14      |
| 2     | 11.497          | 8.864          | 27.477       | 4.95     | 3.86       |
| Total |                 | 179.214        | 712.485      | 100.00   | 100.00     |

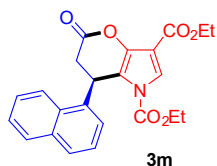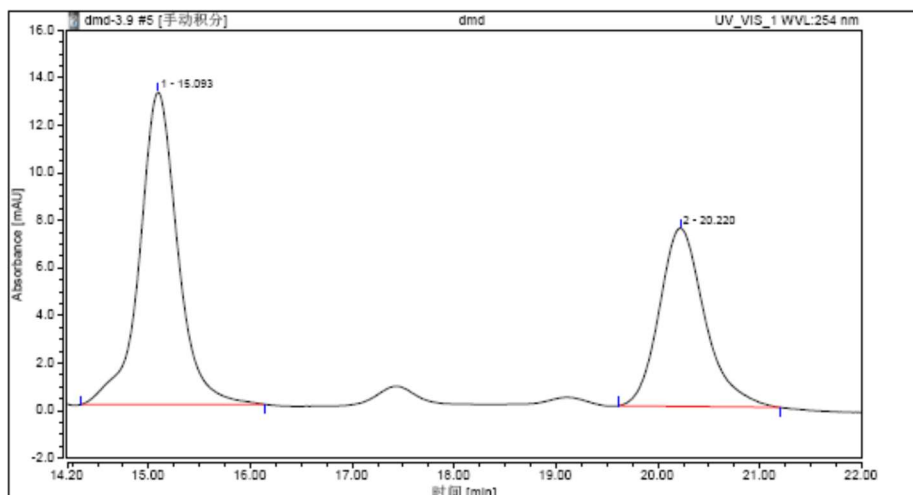

| Peak  | Ret. Time (min) | Area (mAu*min) | Height (mAu) | Area (%) | Height (%) |
|-------|-----------------|----------------|--------------|----------|------------|
| 1     | 15.093          | 5.722          | 13.142       | 59.51    | 63.65      |
| 2     | 20.220          | 3.893          | 7.506        | 40.49    | 36.35      |
| Total |                 | 9.615          | 20.648       | 100.00   | 100.00     |

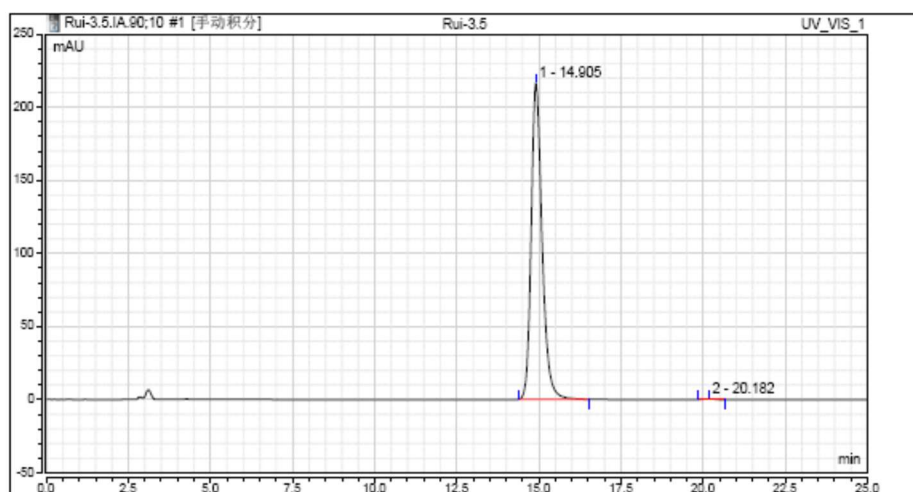

| Peak  | Ret. Time (min) | Area (mAu*min) | Height (mAu) | Area (%) | Height (%) |
|-------|-----------------|----------------|--------------|----------|------------|
| 1     | 14.905          | 83.147         | 216.596      | 99.70    | 99.72      |
| 2     | 20.182          | 0.254          | 0.604        | 0.30     | 0.28       |
| Total |                 | 83.401         | 217.200      | 100.00   | 100.00     |



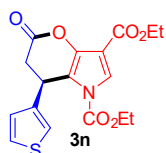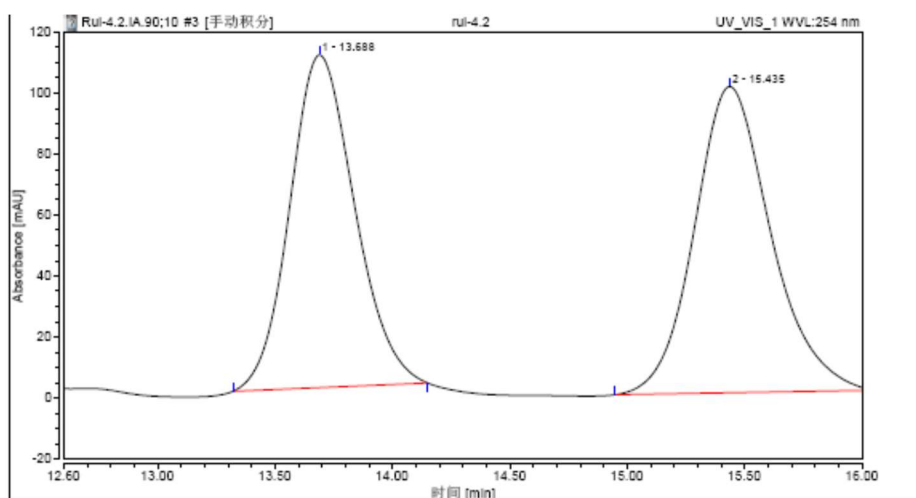

| Peak  | Ret. Time (min) | Area (mAu*min) | Height (mAu) | Area (%) | Height (%) |
|-------|-----------------|----------------|--------------|----------|------------|
| 1     | 13.688          | 34.912         | 109.057      | 47.96    | 52.07      |
| 2     | 15.435          | 37.885         | 100.405      | 52.04    | 47.93      |
| Total |                 | 72.796         | 209.462      | 100.00   | 100.00     |

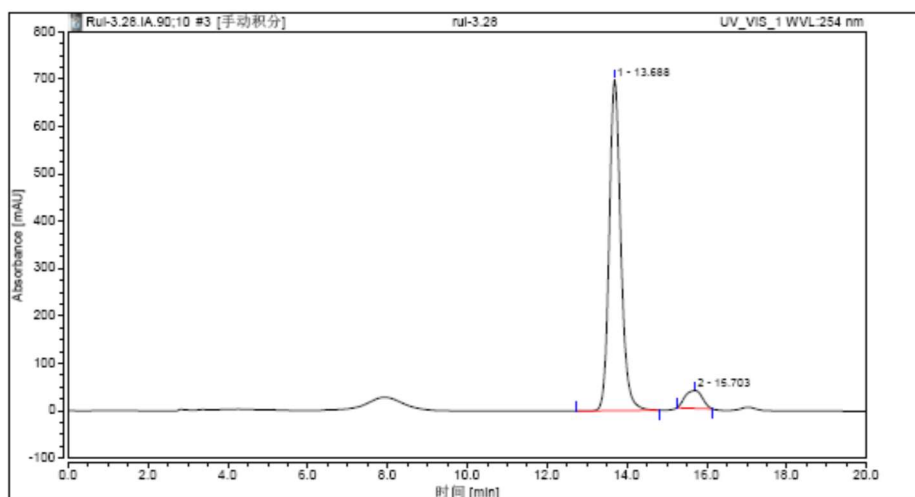

| Peak  | Ret. Time (min) | Area (mAu*min) | Height (mAu) | Area (%) | Height (%) |
|-------|-----------------|----------------|--------------|----------|------------|
| 1     | 13.688          | 234.651        | 699.088      | 92.61    | 94.88      |
| 2     | 15.703          | 18.726         | 37.715       | 7.39     | 5.12       |
| Total |                 | 253.377        | 736.803      | 100.00   | 100.00     |

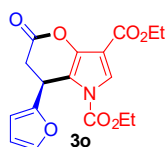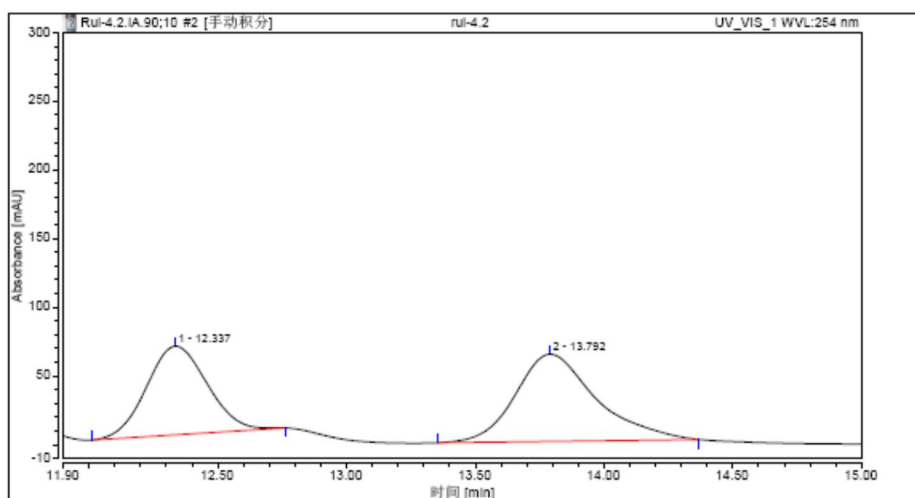

| Peak  | Ret. Time (min) | Area (mAu*min) | Height (mAu) | Area (%) | Height (%) |
|-------|-----------------|----------------|--------------|----------|------------|
| 1     | 12.337          | 17.570         | 64.474       | 43.43    | 50.41      |
| 2     | 13.792          | 22.887         | 63.634       | 56.57    | 49.59      |
| Total |                 | 40.457         | 127.908      | 100.00   | 100.00     |

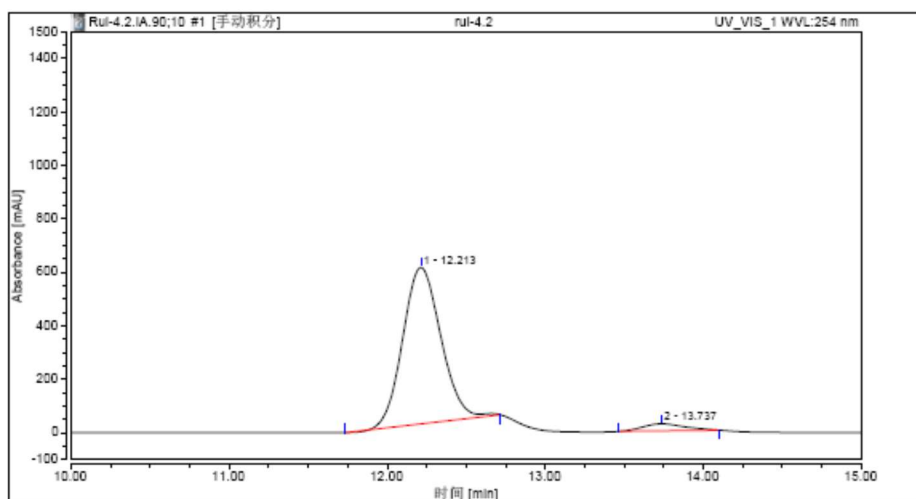

| Peak  | Ret. Time (min) | Area (mAu*min) | Height (mAu) | Area (%) | Height (%) |
|-------|-----------------|----------------|--------------|----------|------------|
| 1     | 12.213          | 163.528        | 585.775      | 95.23    | 95.70      |
| 2     | 13.737          | 8.187          | 26.334       | 4.77     | 4.30       |
| Total |                 | 171.714        | 612.109      | 100.00   | 100.00     |

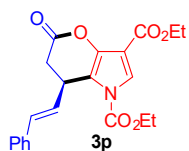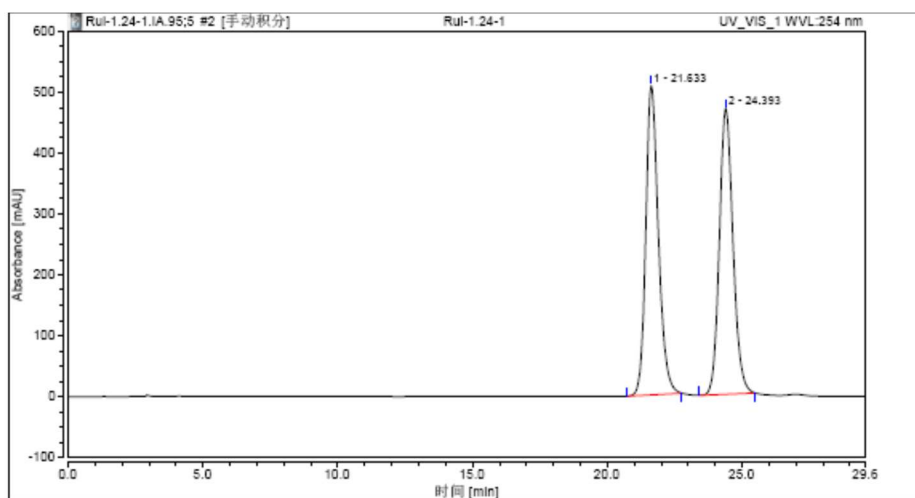

| Peak  | Ret. Time (min) | Area (mAu*min) | Height (mAu) | Area (%) | Height (%) |
|-------|-----------------|----------------|--------------|----------|------------|
| 1     | 21.633          | 275.333        | 508.943      | 50.07    | 52.00      |
| 2     | 24.393          | 274.565        | 469.791      | 49.93    | 48.00      |
| Total |                 | 549.898        | 978.734      | 100.00   | 100.00     |

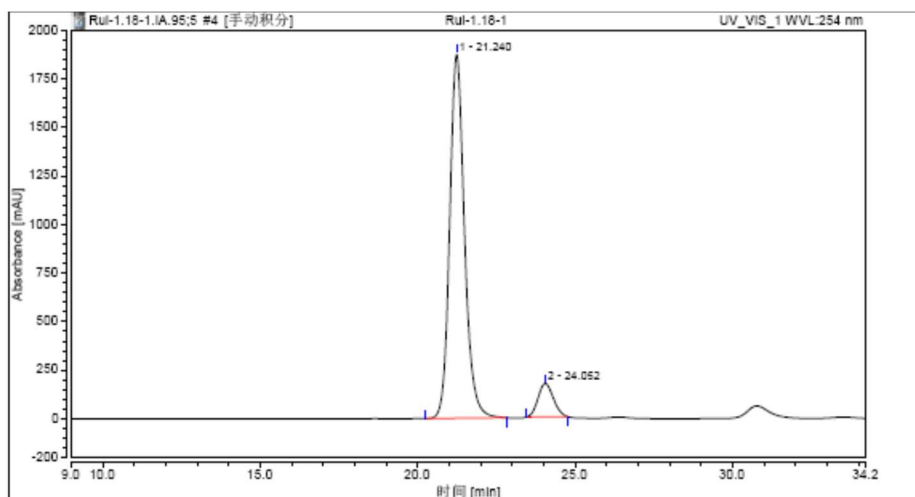

| Peak  | Ret. Time (min) | Area (mAu*min) | Height (mAu) | Area (%) | Height (%) |
|-------|-----------------|----------------|--------------|----------|------------|
| 1     | 21.240          | 1019.536       | 1875.520     | 91.29    | 91.55      |
| 2     | 24.052          | 97.308         | 173.017      | 8.71     | 8.45       |
| Total |                 | 1116.844       | 2048.536     | 100.00   | 100.00     |

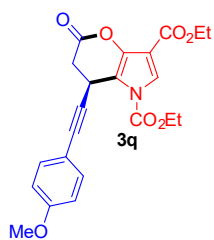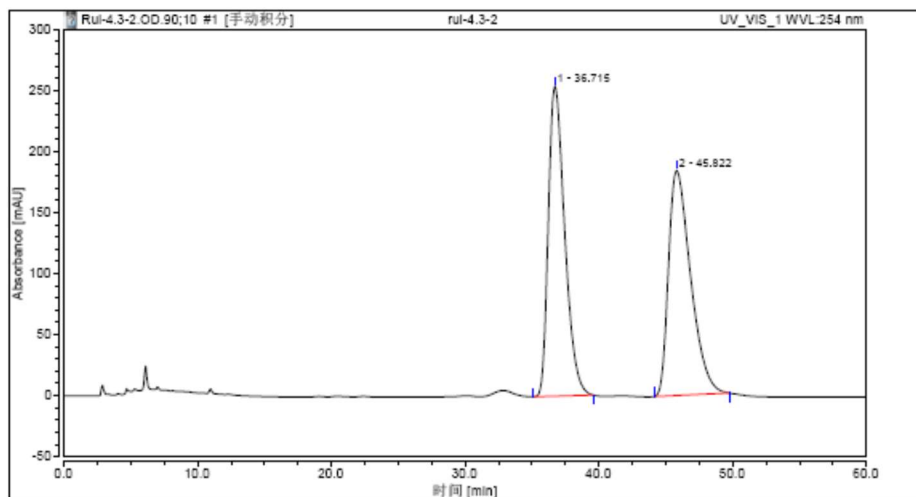

| Peak  | Ret. Time (min) | Area (mAu*min) | Height (mAu) | Area (%) | Height (%) |
|-------|-----------------|----------------|--------------|----------|------------|
| 1     | 36.715          | 360.488        | 254.355      | 50.57    | 57.97      |
| 2     | 45.822          | 352.354        | 184.413      | 49.43    | 42.03      |
| Total |                 | 712.842        | 438.768      | 100.00   | 100.00     |

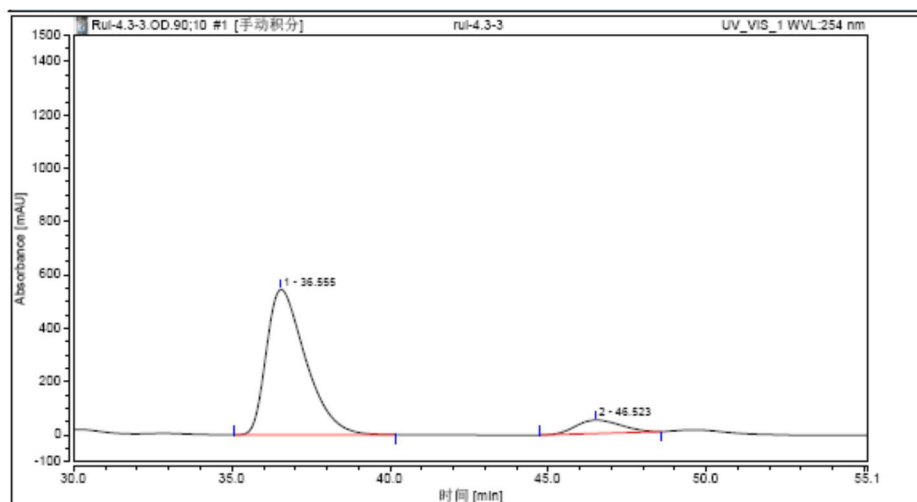

| Peak  | Ret. Time (min) | Area (mAu*min) | Height (mAu) | Area (%) | Height (%) |
|-------|-----------------|----------------|--------------|----------|------------|
| 1     | 36.555          | 785.543        | 454.677      | 90.60    | 91.62      |
| 2     | 46.523          | 81.532         | 49.913       | 9.40     | 8.38       |
| Total |                 | 867.075        | 595.590      | 100.00   | 100.00     |

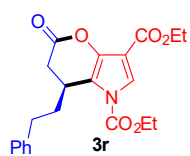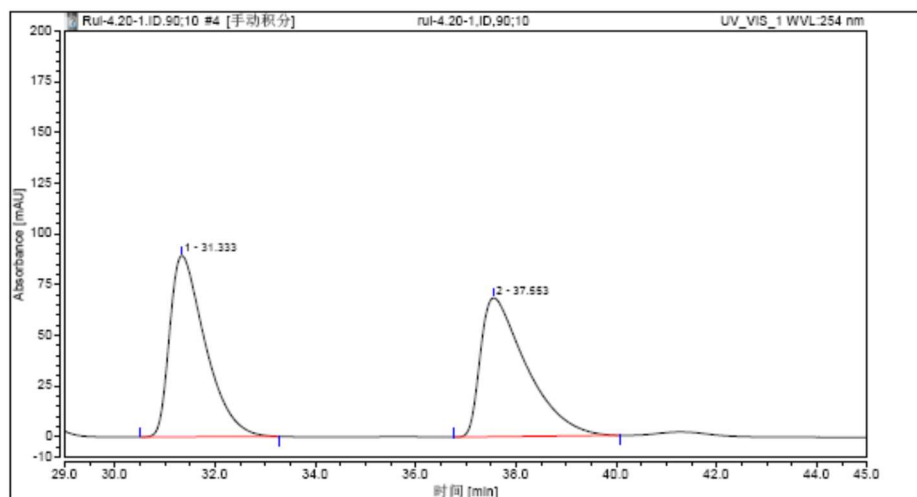

| Peak  | Ret. Time (min) | Area (mAu*min) | Height (mAu) | Area (%) | Height (%) |
|-------|-----------------|----------------|--------------|----------|------------|
| 1     | 31.333          | 73.409         | 89.304       | 50.27    | 56.62      |
| 2     | 37.553          | 72.621         | 68.409       | 49.73    | 43.38      |
| Total |                 | 146.030        | 157.713      | 100.00   | 100.00     |

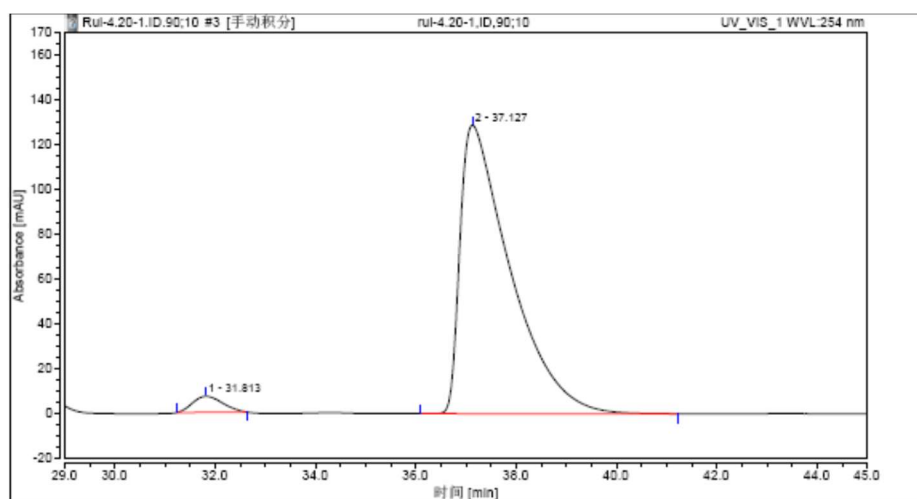

| Peak  | Ret. Time (min) | Area (mAu*min) | Height (mAu) | Area (%) | Height (%) |
|-------|-----------------|----------------|--------------|----------|------------|
| 1     | 31.813          | 4.964          | 7.169        | 3.23     | 5.28       |
| 2     | 37.127          | 148.750        | 128.661      | 96.77    | 94.72      |
| Total |                 | 153.714        | 135.830      | 100.00   | 100.00     |

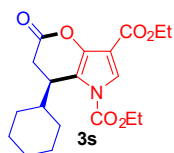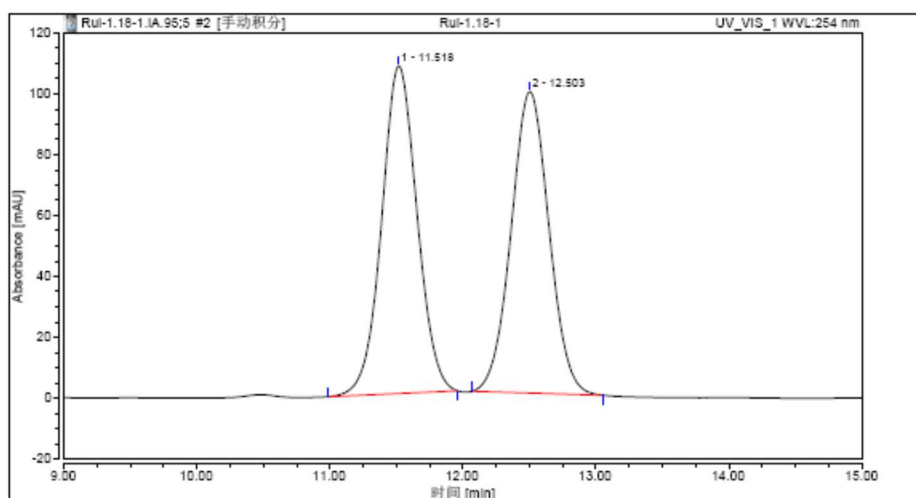

| Peak  | Ret. Time (min) | Area (mAu*min) | Height (mAu) | Area (%) | Height (%) |
|-------|-----------------|----------------|--------------|----------|------------|
| 1     | 11.518          | 33.206         | 107.684      | 50.41    | 52.08      |
| 2     | 12.503          | 32.661         | 99.070       | 49.59    | 47.92      |
| Total |                 | 65.867         | 206.755      | 100.00   | 100.00     |

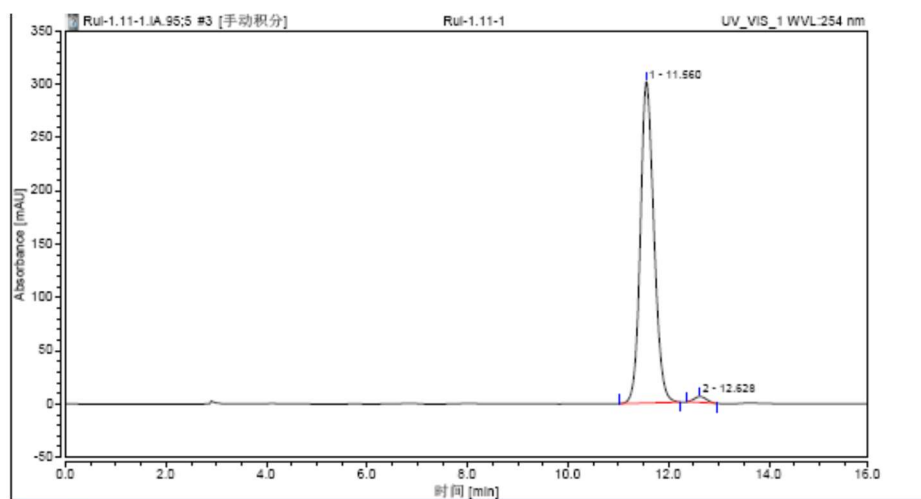

| Peak  | Ret. Time (min) | Area (mAu*min) | Height (mAu) | Area (%) | Height (%) |
|-------|-----------------|----------------|--------------|----------|------------|
| 1     | 11.560          | 94.186         | 301.554      | 98.38    | 98.20      |
| 2     | 12.628          | 1.552          | 5.522        | 1.62     | 1.82       |
| Total |                 | 95.738         | 307.076      | 100.00   | 100.00     |

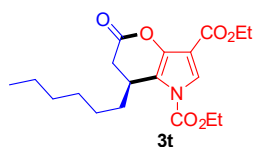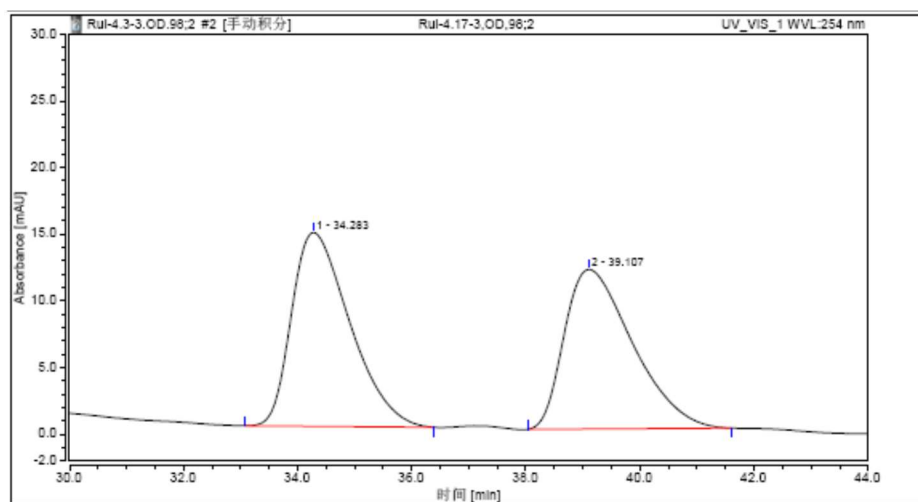

| Peak  | Ret. Time (min) | Area (mAu*min) | Height (mAu) | Area (%) | Height (%) |
|-------|-----------------|----------------|--------------|----------|------------|
| 1     | 34.283          | 17.182         | 14.537       | 50.91    | 54.85      |
| 2     | 39.107          | 16.567         | 11.968       | 49.09    | 45.15      |
| Total |                 | 33.750         | 26.505       | 100.00   | 100.00     |

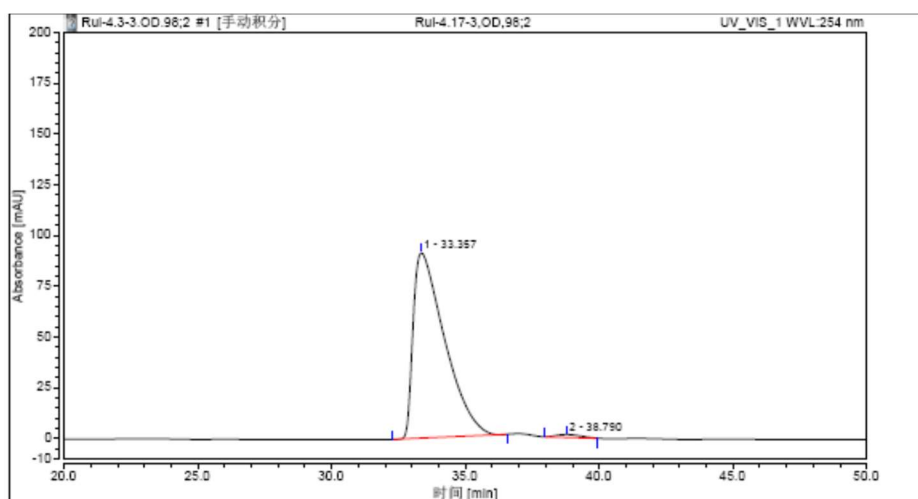

| Peak  | Ret. Time (min) | Area (mAu*min) | Height (mAu) | Area (%) | Height (%) |
|-------|-----------------|----------------|--------------|----------|------------|
| 1     | 33.357          | 123.956        | 91.215       | 98.80    | 98.46      |
| 2     | 38.790          | 1.509          | 1.429        | 1.20     | 1.54       |
| Total |                 | 125.466        | 92.644       | 100.00   | 100.00     |

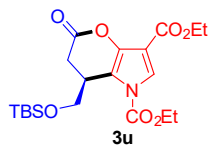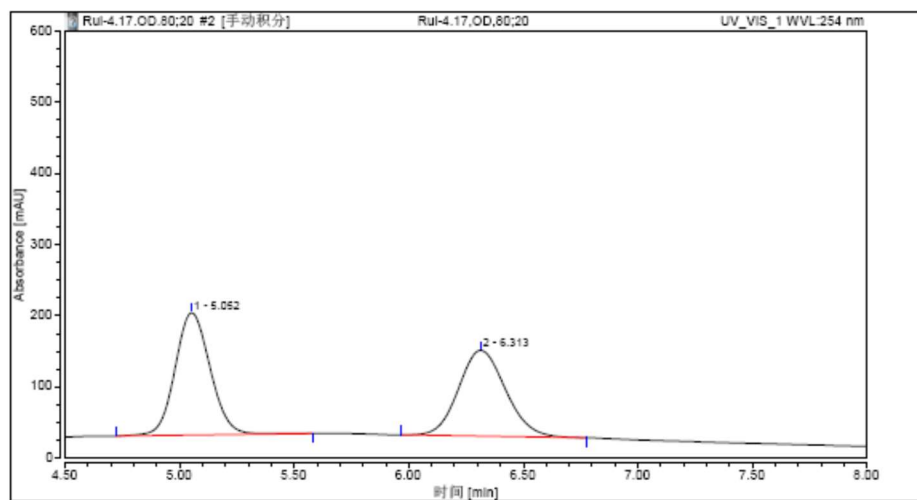

| Peak  | Ret. Time (min) | Area (mAu*min) | Height (mAu) | Area (%) | Height (%) |
|-------|-----------------|----------------|--------------|----------|------------|
| 1     | 5.052           | 30.552         | 171.800      | 51.57    | 58.77      |
| 2     | 6.313           | 28.689         | 120.526      | 48.43    | 41.23      |
| Total |                 | 59.240         | 292.326      | 100.00   | 100.00     |

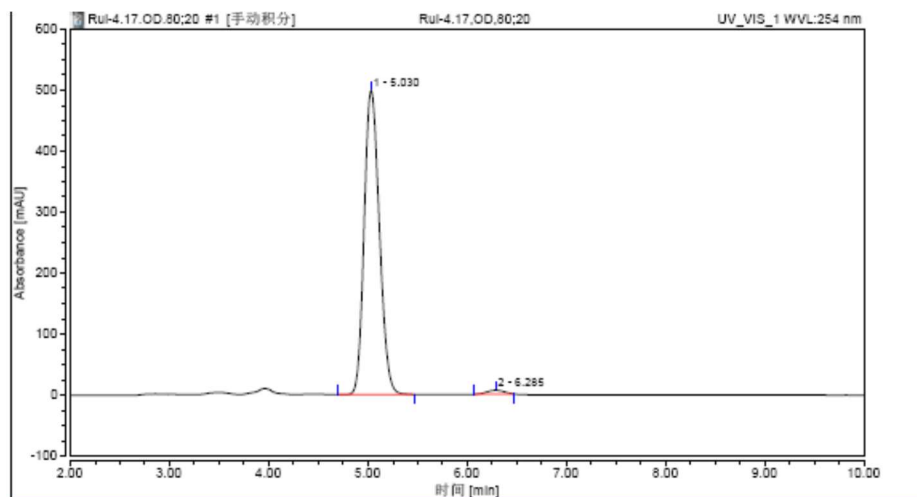

| Peak  | Ret. Time (min) | Area (mAu*min) | Height (mAu) | Area (%) | Height (%) |
|-------|-----------------|----------------|--------------|----------|------------|
| 1     | 5.030           | 88.323         | 499.293      | 98.65    | 98.72      |
| 2     | 6.285           | 1.300          | 6.476        | 1.45     | 1.28       |
| Total |                 | 89.623         | 505.769      | 100.00   | 100.00     |



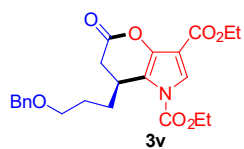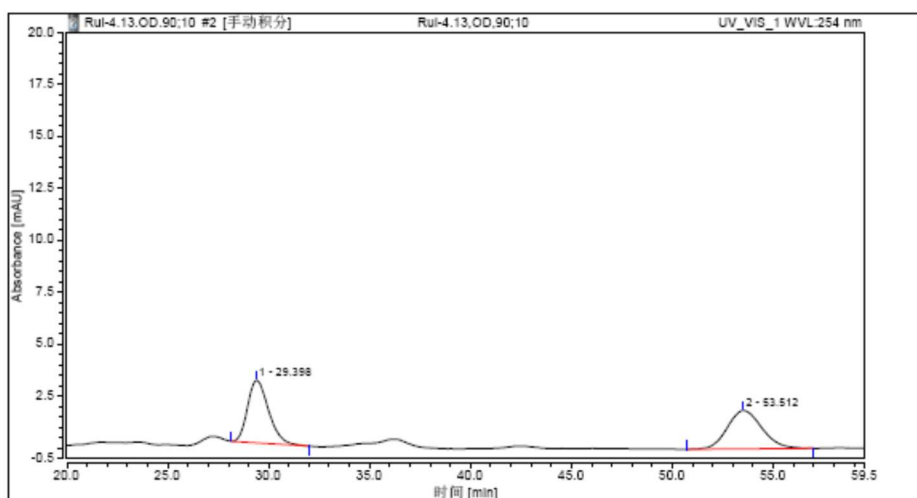

| Peak  | Ret. Time (min) | Area (mAu*min) | Height (mAu) | Area (%) | Height (%) |
|-------|-----------------|----------------|--------------|----------|------------|
| 1     | 29.398          | 3.626          | 3.014        | 49.56    | 61.92      |
| 2     | 53.512          | 3.691          | 1.854        | 50.44    | 38.08      |
| Total |                 | 7.317          | 4.868        | 10.00    | 100.00     |

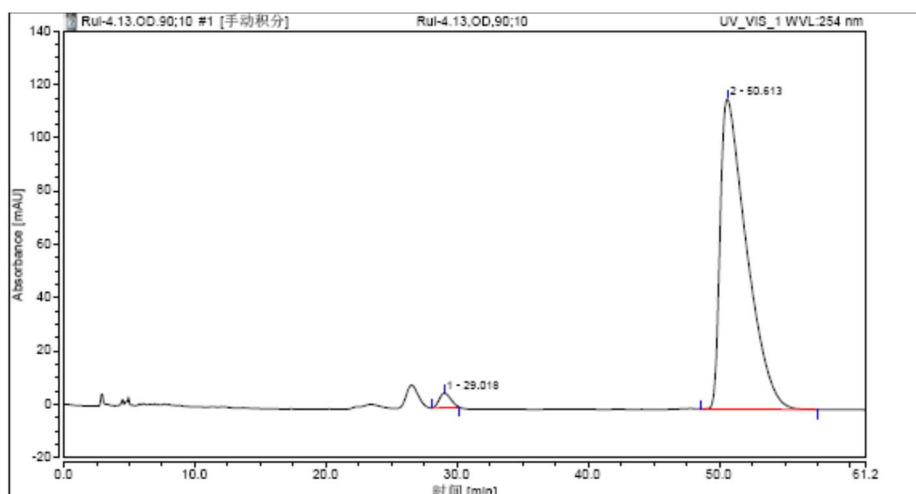

| Peak  | Ret. Time (min) | Area (mAu*min) | Height (mAu) | Area (%) | Height (%) |
|-------|-----------------|----------------|--------------|----------|------------|
| 1     | 29.018          | 5.565          | 5.432        | 2.01     | 4.45       |
| 2     | 50.613          | 271.016        | 116.504      | 97.99    | 95.55      |
| Total |                 | 276.581        | 121.936      | 100.00   | 100.00     |

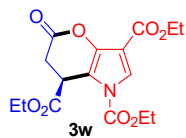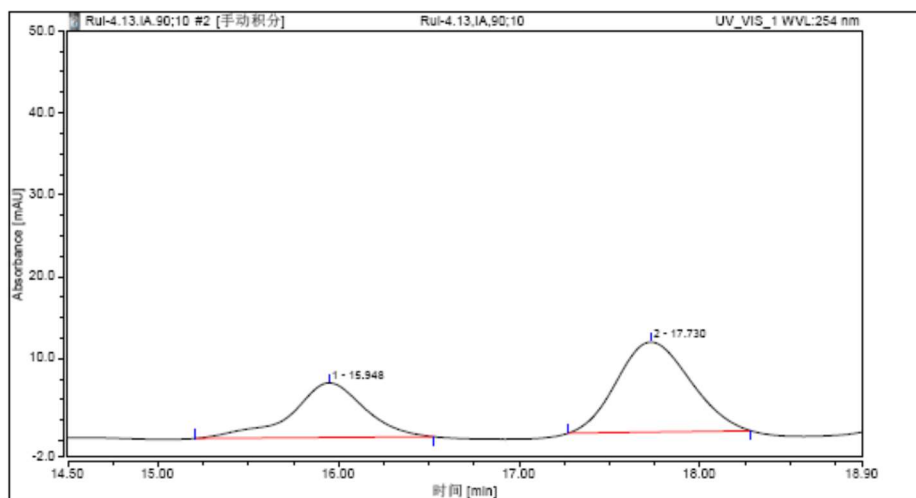

| Peak  | Ret. Time (min) | Area (mAu*min) | Height (mAu) | Area (%) | Height (%) |
|-------|-----------------|----------------|--------------|----------|------------|
| 1     | 15.948          | 3.140          | 6.668        | 37.71    | 37.76      |
| 2     | 17.730          | 5.187          | 10.993       | 62.29    | 62.24      |
| Total |                 | 8.326          | 17.661       | 100.00   | 100.00     |

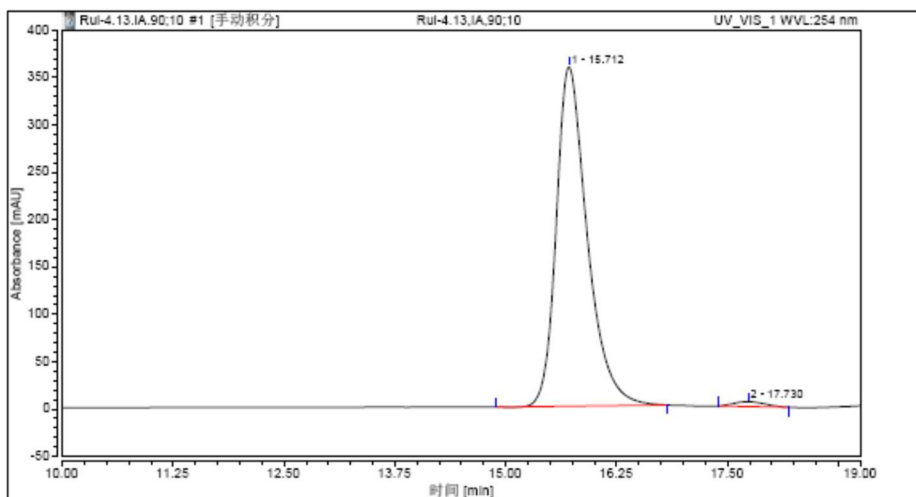

| Peak  | Ret. Time (min) | Area (mAu*min) | Height (mAu) | Area (%) | Height (%) |
|-------|-----------------|----------------|--------------|----------|------------|
| 1     | 15.712          | 145.383        | 358.422      | 98.59    | 98.58      |
| 2     | 17.730          | 2.072          | 5.150        | 1.41     | 1.42       |
| Total |                 | 147.455        | 363.572      | 100.00   | 100.00     |

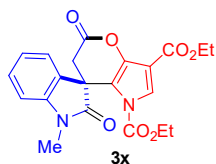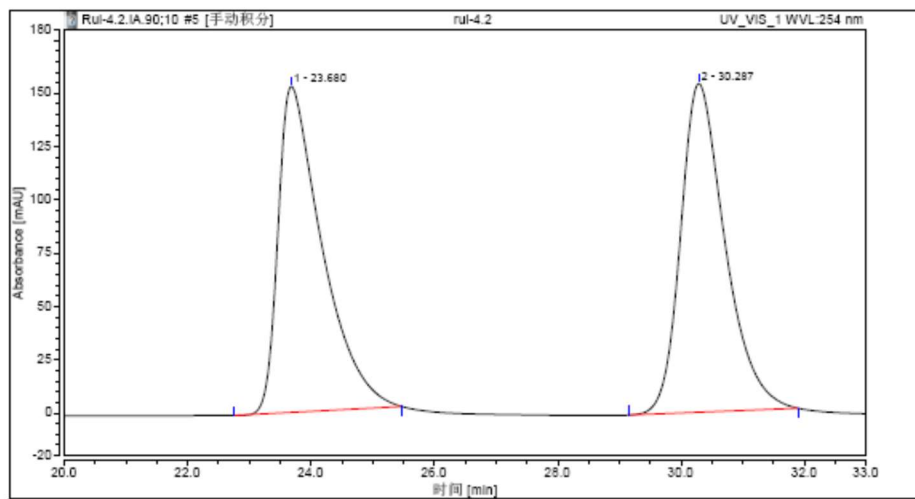

| Peak  | Ret. Time (min) | Area (mAu*min) | Height (mAu) | Area (%) | Height (%) |
|-------|-----------------|----------------|--------------|----------|------------|
| 1     | 23.680          | 126.488        | 153.053      | 49.53    | 49.80      |
| 2     | 30.287          | 128.875        | 154.307      | 50.47    | 50.20      |
| Total |                 | 255.363        | 307.360      | 100.00   | 100.00     |

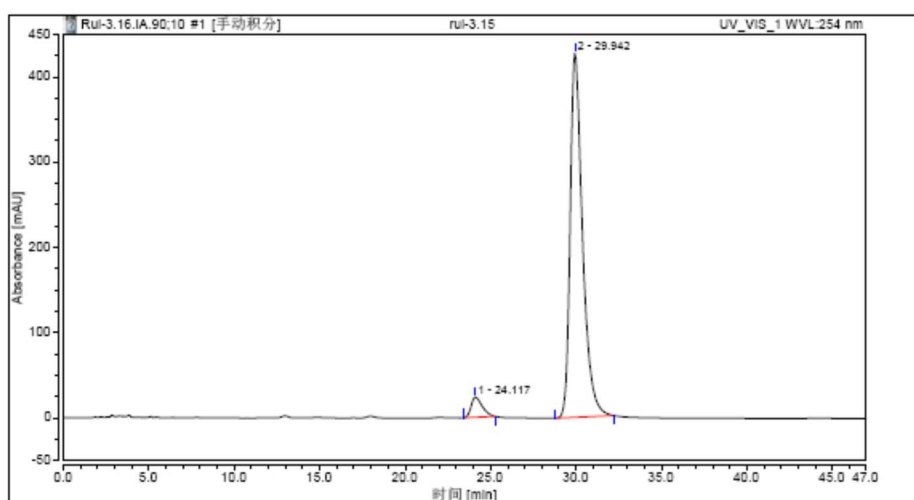

| Peak  | Ret. Time (min) | Area (mAu*min) | Height (mAu) | Area (%) | Height (%) |
|-------|-----------------|----------------|--------------|----------|------------|
| 1     | 24.117          | 17.802         | 23.734       | 4.75     | 5.26       |
| 2     | 29.942          | 356.888        | 427.555      | 95.25    | 94.74      |
| Total |                 | 374.691        | 451.289      | 100.00   | 100.00     |

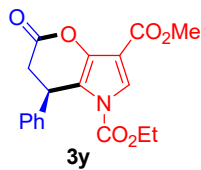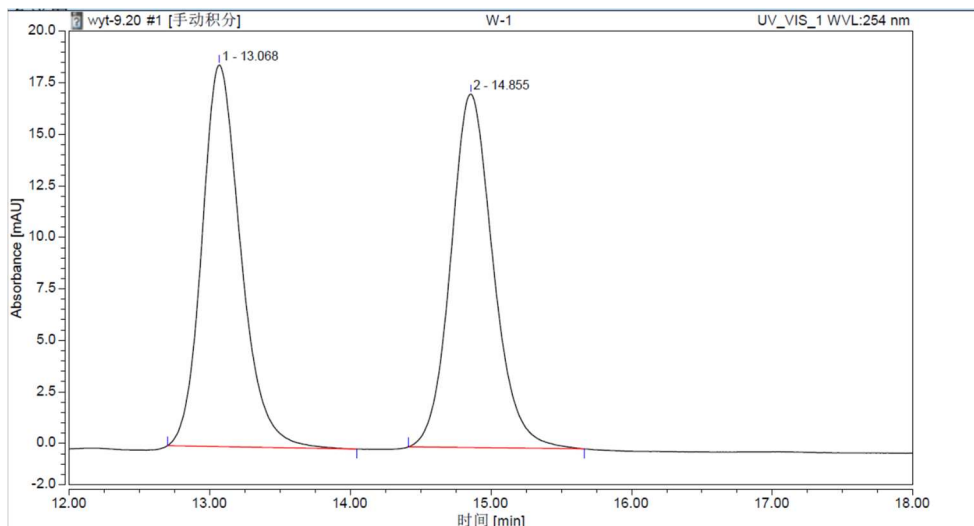

| Peak# | Ret. Time (min) | Area (mAU)    | Height (mAU)  | Area % | Height % |
|-------|-----------------|---------------|---------------|--------|----------|
| 1     | 13.068          | 5.945         | 18.536        | 49.83  | 51.92    |
| 2     | 14.855          | 5.986         | 17.167        | 50.17  | 48.08    |
| Total |                 | <b>11.931</b> | <b>35.703</b> | 100.00 | 100.00   |

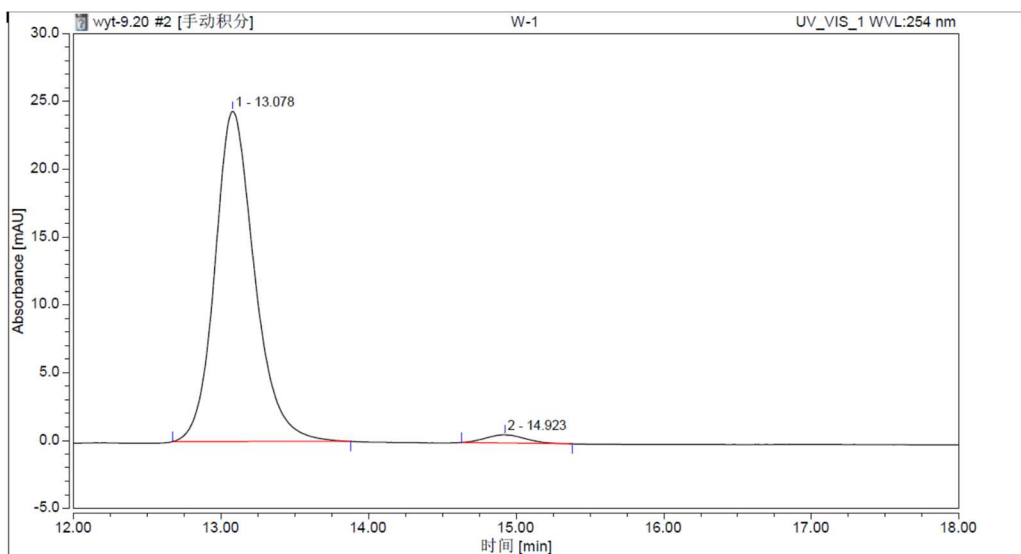

| Peak# | Ret. Time (min) | Area (mAU)   | Height (mAU)  | Area % | Height % |
|-------|-----------------|--------------|---------------|--------|----------|
| 1     | 13.078          | 7.588        | 24.351        | 97.61  | 97.56    |
| 2     | 14.923          | 0.186        | 0.609         | 2.39   | 2.44     |
| Total |                 | <b>7.773</b> | <b>24.960</b> | 100.00 | 100.00   |

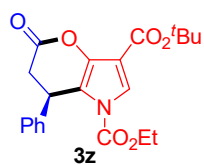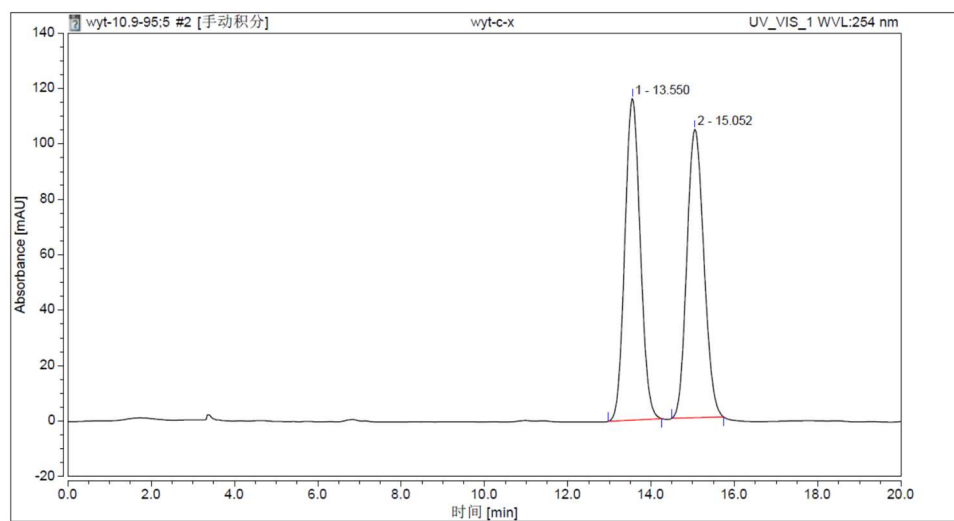

| Peak# | Ret. Time (min) | Area (mAU)    | Height (mAU)   | Area % | Height % |
|-------|-----------------|---------------|----------------|--------|----------|
| 1     | 13.550          | 49.859        | 116.152        | 50.38  | 52.73    |
| 2     | 15.052          | 49.105        | 104.110        | 49.62  | 47.27    |
| Total |                 | <b>98.964</b> | <b>220.262</b> | 100.00 | 100.00   |

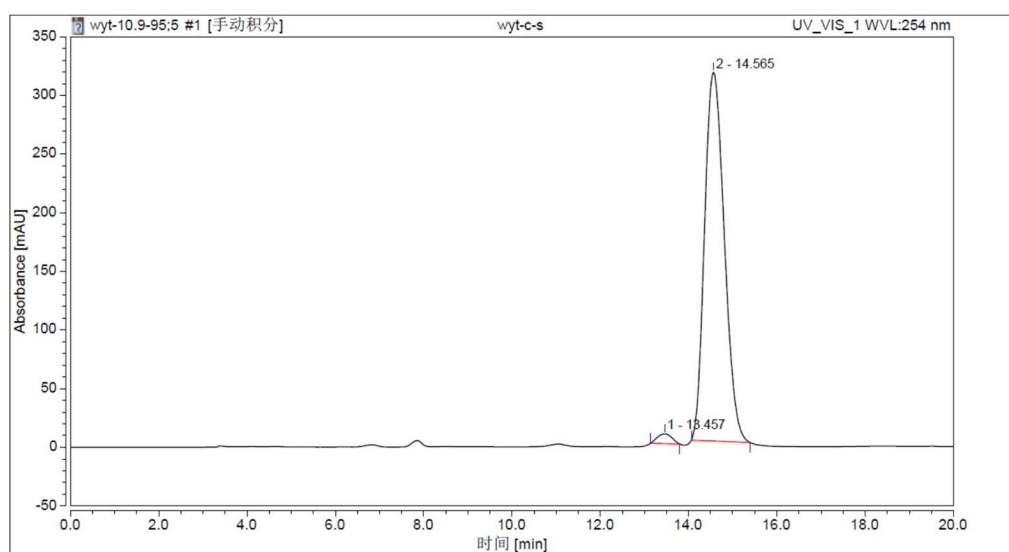

| Peak# | Ret. Time (min) | Area (mAU)     | Height (mAU)   | Area % | Height % |
|-------|-----------------|----------------|----------------|--------|----------|
| 1     | 13.457          | 3.230          | 8.451          | 1.95   | 2.62     |
| 2     | 14.565          | 162.228        | 314.475        | 98.05  | 97.38    |
| Total |                 | <b>165.457</b> | <b>322.927</b> | 100.00 | 100.00   |

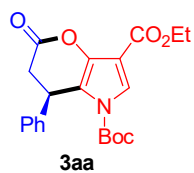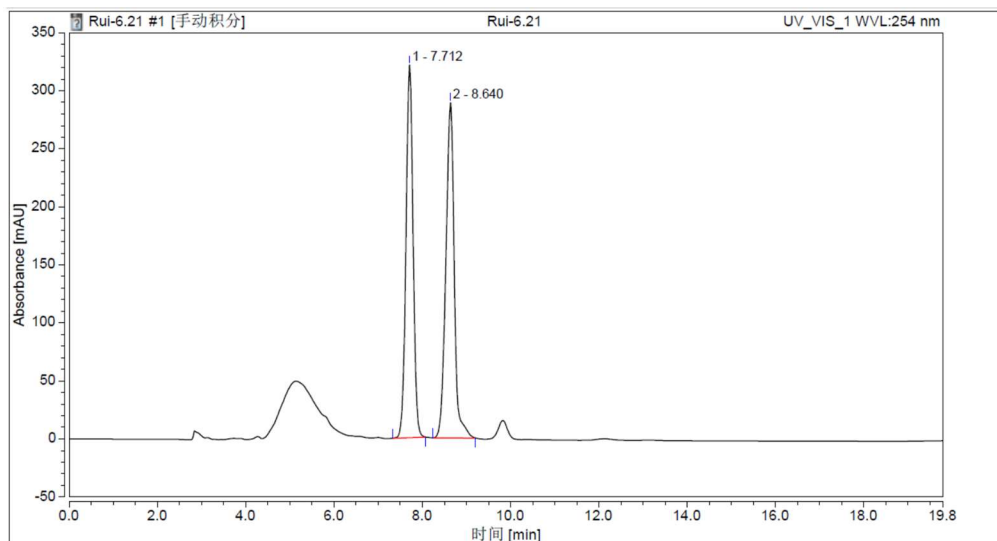

| Peak#        | Ret. Time (min) | Area (mAU)     | Height (mAU)   | Area %        | Height %      |
|--------------|-----------------|----------------|----------------|---------------|---------------|
| 1            | 7.712           | 59.658         | 320.981        | 48.49         | 52.64         |
| 2            | 8.640           | 63.379         | 288.839        | 51.51         | 47.36         |
| <b>Total</b> |                 | <b>123.037</b> | <b>609.820</b> | <b>100.00</b> | <b>100.00</b> |

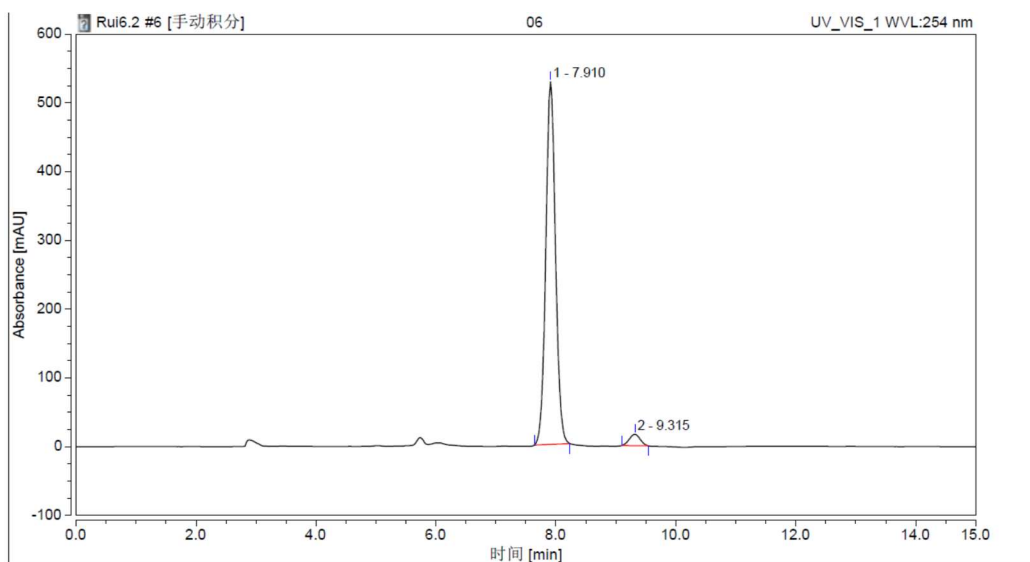

| Peak#        | Ret. Time (min) | Area (mAU)     | Height (mAU)   | Area %        | Height %      |
|--------------|-----------------|----------------|----------------|---------------|---------------|
| 1            | 7.910           | 98.411         | 527.786        | 96.64         | 96.97         |
| 2            | 9.315           | 3.423          | 16.471         | 3.36          | 3.03          |
| <b>Total</b> |                 | <b>101.833</b> | <b>544.257</b> | <b>100.00</b> | <b>100.00</b> |

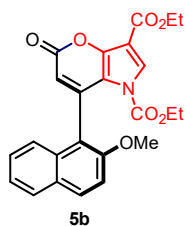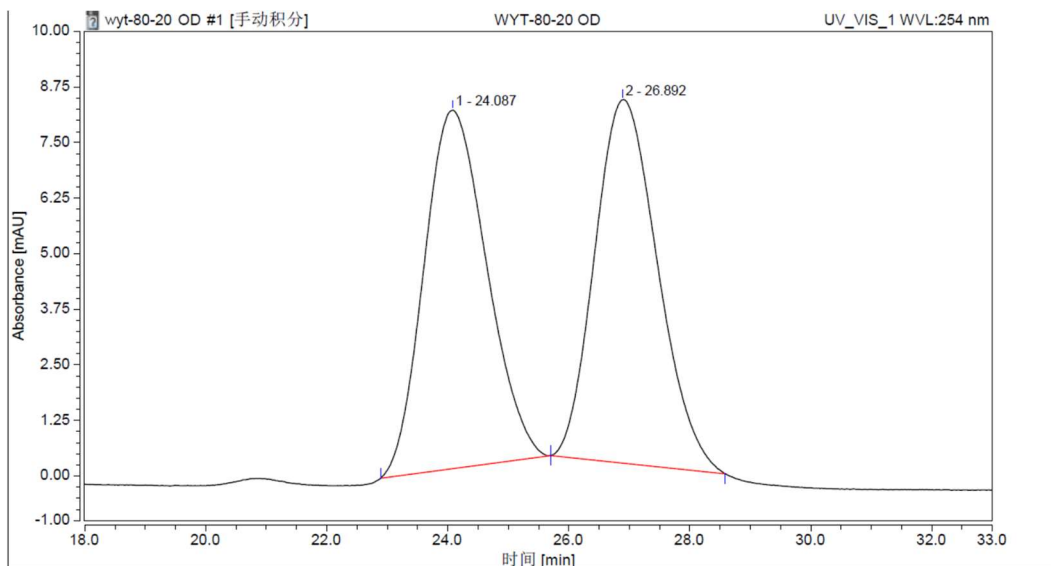

| Peak#        | Ret. Time (min) | Area (mAU)    | Height (mAU)  | Area %        | Height %      |
|--------------|-----------------|---------------|---------------|---------------|---------------|
| 1            | 24.087          | 9.666         | 8.064         | 49.52         | 49.63         |
| 2            | 26.892          | 9.853         | 8.183         | 50.48         | 50.37         |
| <b>Total</b> |                 | <b>19.519</b> | <b>16.246</b> | <b>100.00</b> | <b>100.00</b> |

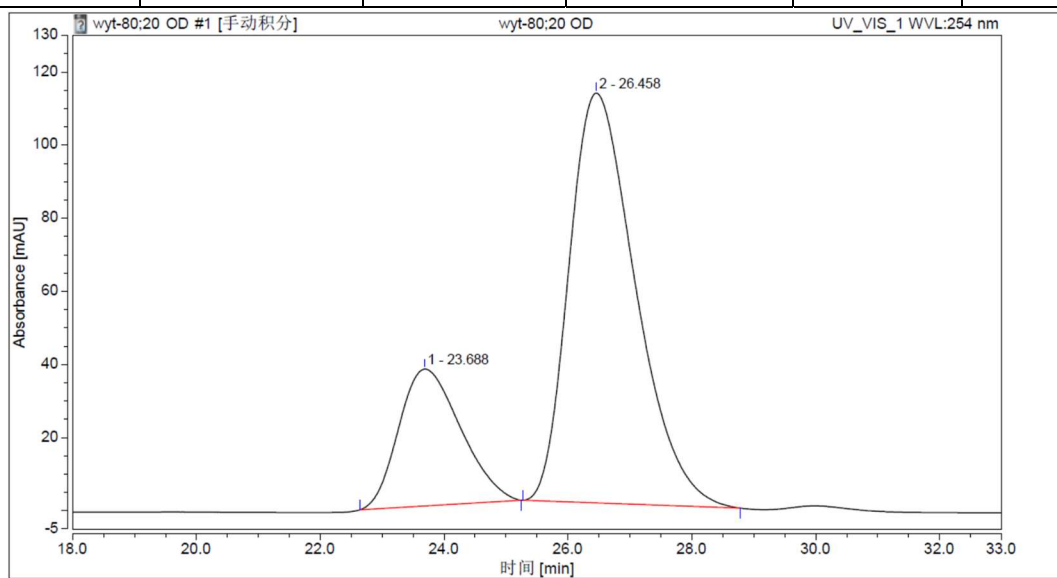

| Peak#        | Ret. Time (min) | Area (mAU)     | Height (mAU)   | Area %        | Height %      |
|--------------|-----------------|----------------|----------------|---------------|---------------|
| 1            | 23.688          | 43.228         | 37.444         | 23.67         | 25.03         |
| 2            | 26.458          | 139.391        | 112.141        | 76.33         | 74.97         |
| <b>Total</b> |                 | <b>182.619</b> | <b>149.586</b> | <b>100.00</b> | <b>100.00</b> |

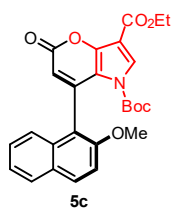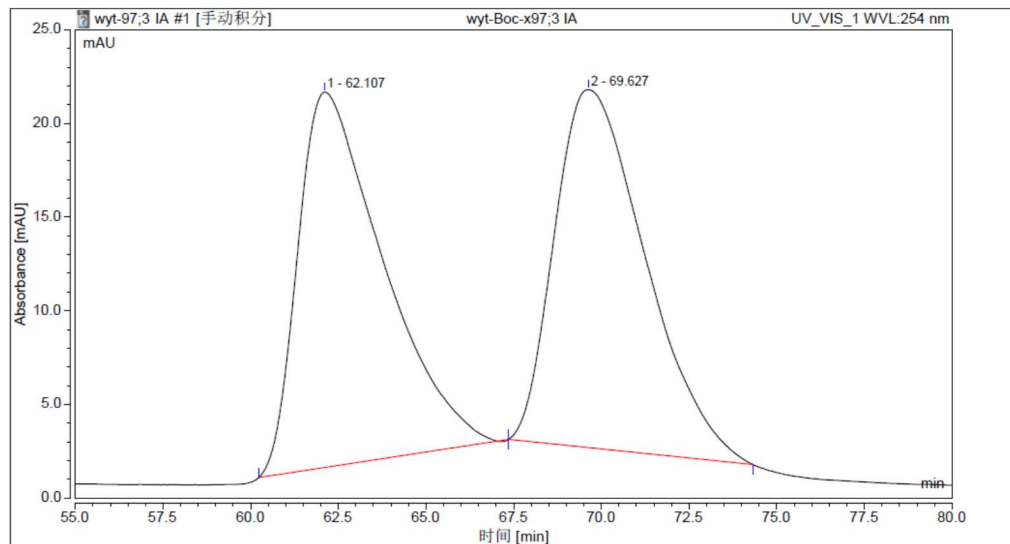

| Peak# | Ret. Time (min) | Area (mAU)     | Height (mAU)  | Area % | Height % |
|-------|-----------------|----------------|---------------|--------|----------|
| 1     | 62.107          | 56.286         | 20.043        | 49.52  | 51.21    |
| 2     | 69.627          | 57.378         | 19.099        | 50.48  | 48.79    |
| Total |                 | <b>113.665</b> | <b>39.142</b> | 100.00 | 100.00   |

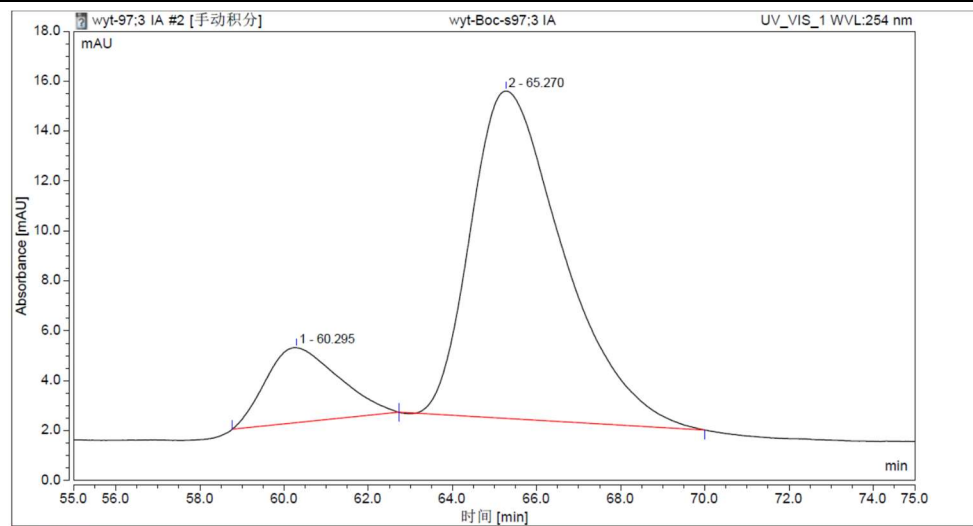

| Peak# | Ret. Time (min) | Area (mAU)    | Height (mAU)  | Area % | Height % |
|-------|-----------------|---------------|---------------|--------|----------|
| 1     | 60.295          | 5.981         | 3.007         | 15.15  | 18.64    |
| 2     | 65.270          | 33.496        | 13.127        | 84.85  | 81.36    |
| Total |                 | <b>39.476</b> | <b>16.134</b> | 100.00 | 100.00   |

**Part 5:**  $^1\text{H}$ NMR and  $^{13}\text{C}$ NMR spectra



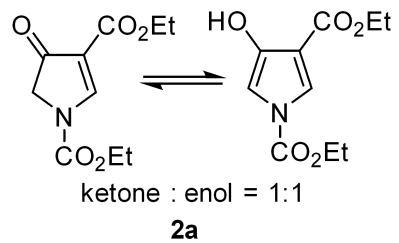

7.602  
 7.599  
 7.432  
 7.284  
 — 6.766

4.452  
 4.435  
 4.417  
 4.399  
 4.384  
 4.374  
 4.372  
 4.366  
 4.356  
 4.348  
 4.339  
 4.321  
 4.311  
 4.293  
 4.223

1.431  
 1.413  
 1.403  
 1.393  
 1.390  
 1.388  
 1.372  
 1.370  
 1.354  
 1.338  
 1.320  
 — 0.000

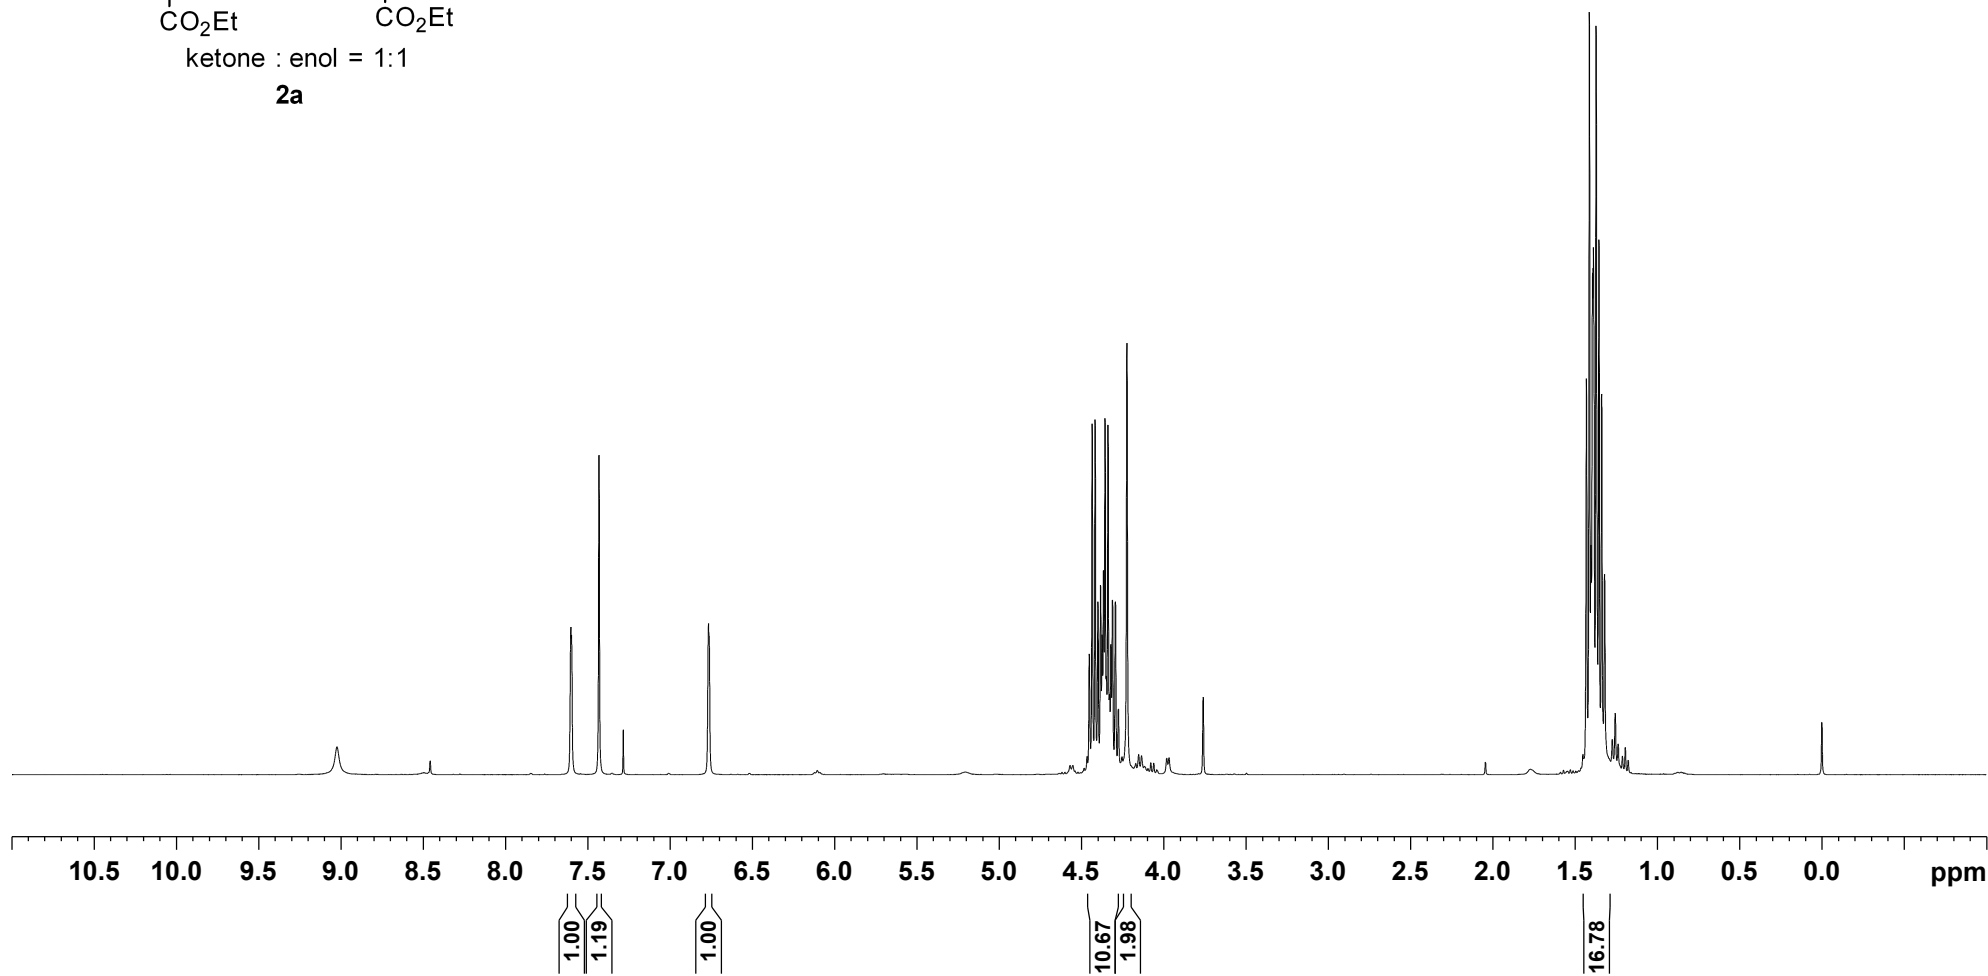

191.65  
 166.14  
 163.08  
 161.29  
 149.80  
 146.29  
 121.04  
 113.76  
 108.50  
 101.47  
 77.32  
 77.00  
 76.68  
 64.16  
 60.64  
 55.65  
 14.21  
 14.13

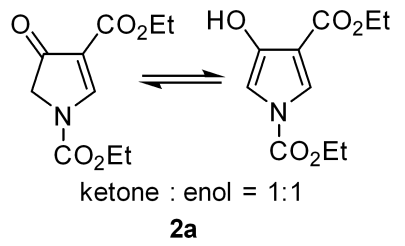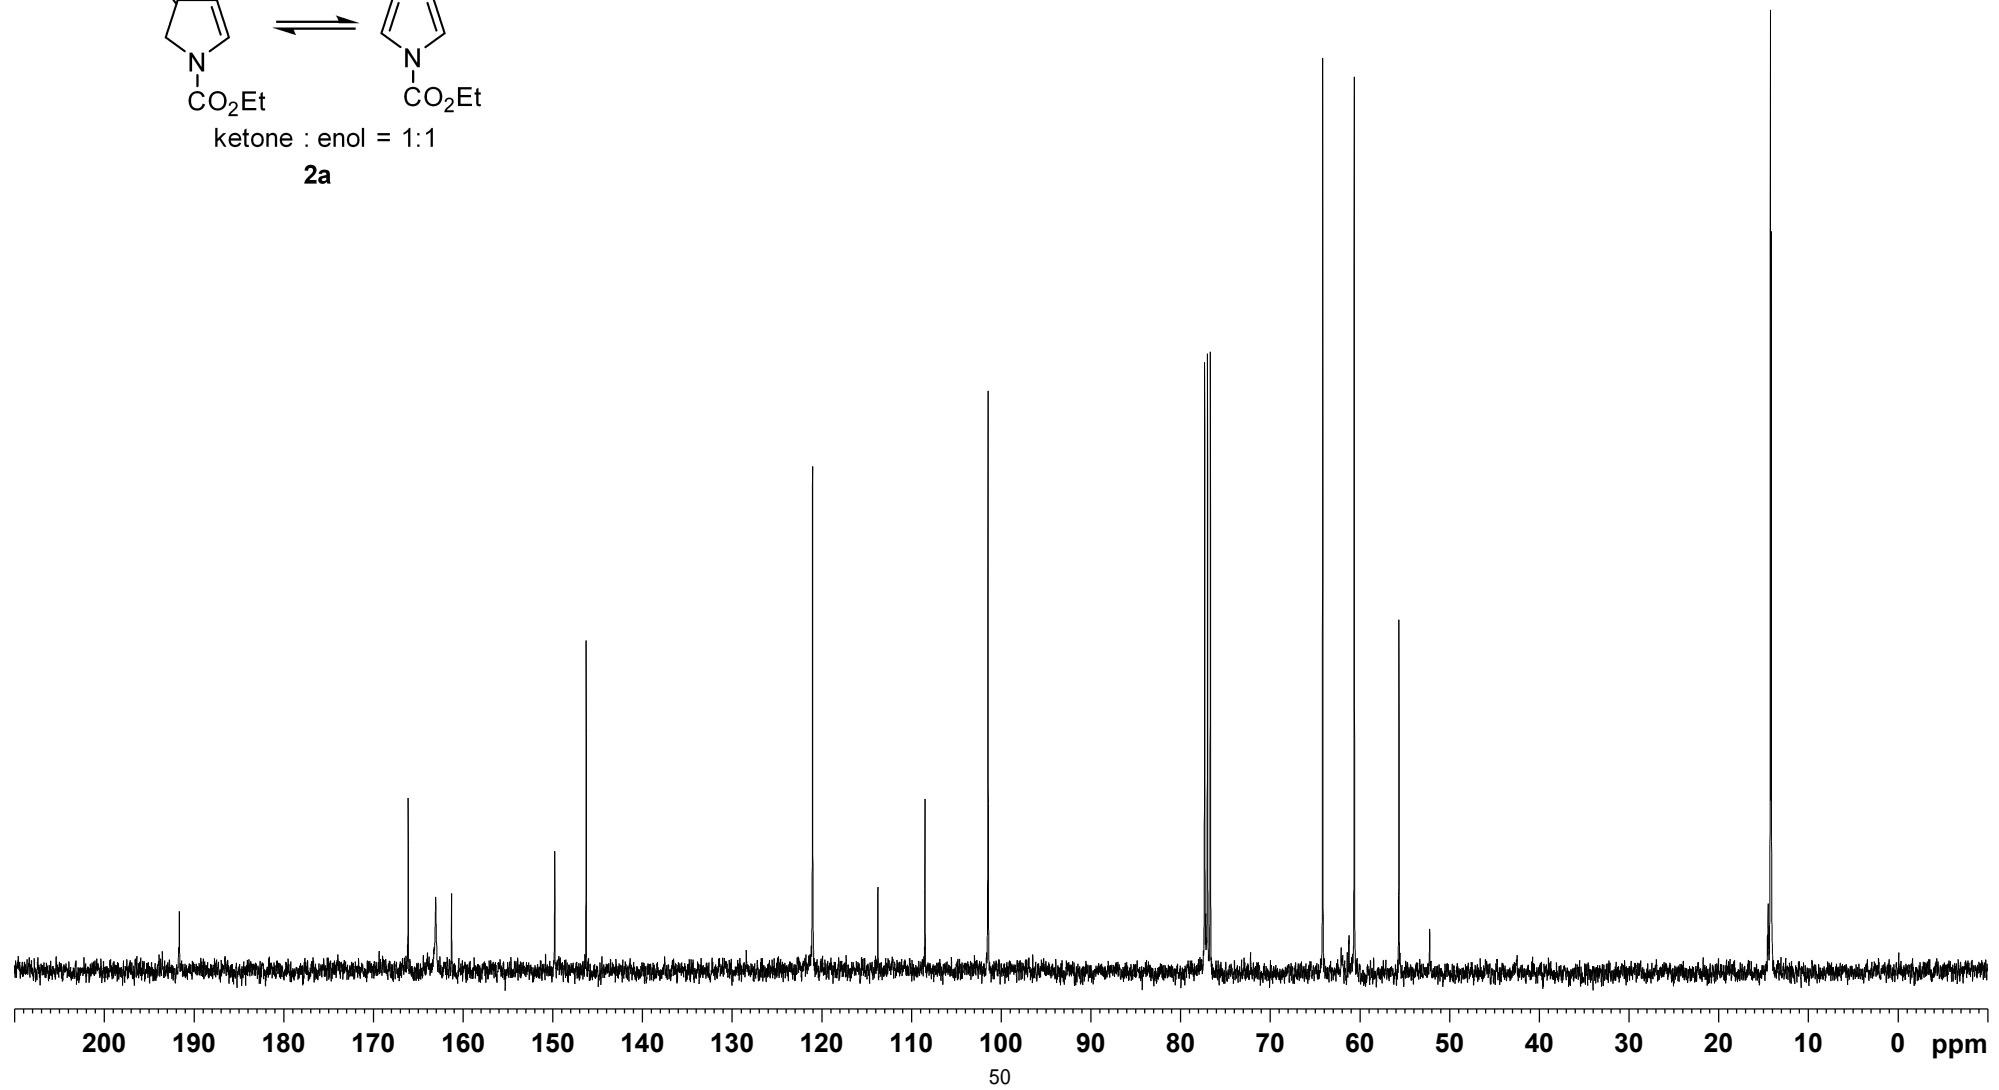

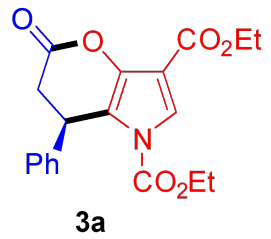

7.824  
7.312  
7.294  
7.276  
7.263  
7.237  
7.219  
7.082  
7.064

4.827  
4.808  
4.393  
4.376  
4.358  
4.342  
4.324  
4.306  
4.289  
4.272  
4.263  
3.270  
3.249  
3.230  
3.210  
2.964  
2.924

1.410  
1.392  
1.375  
1.283  
1.266  
1.248

0.000

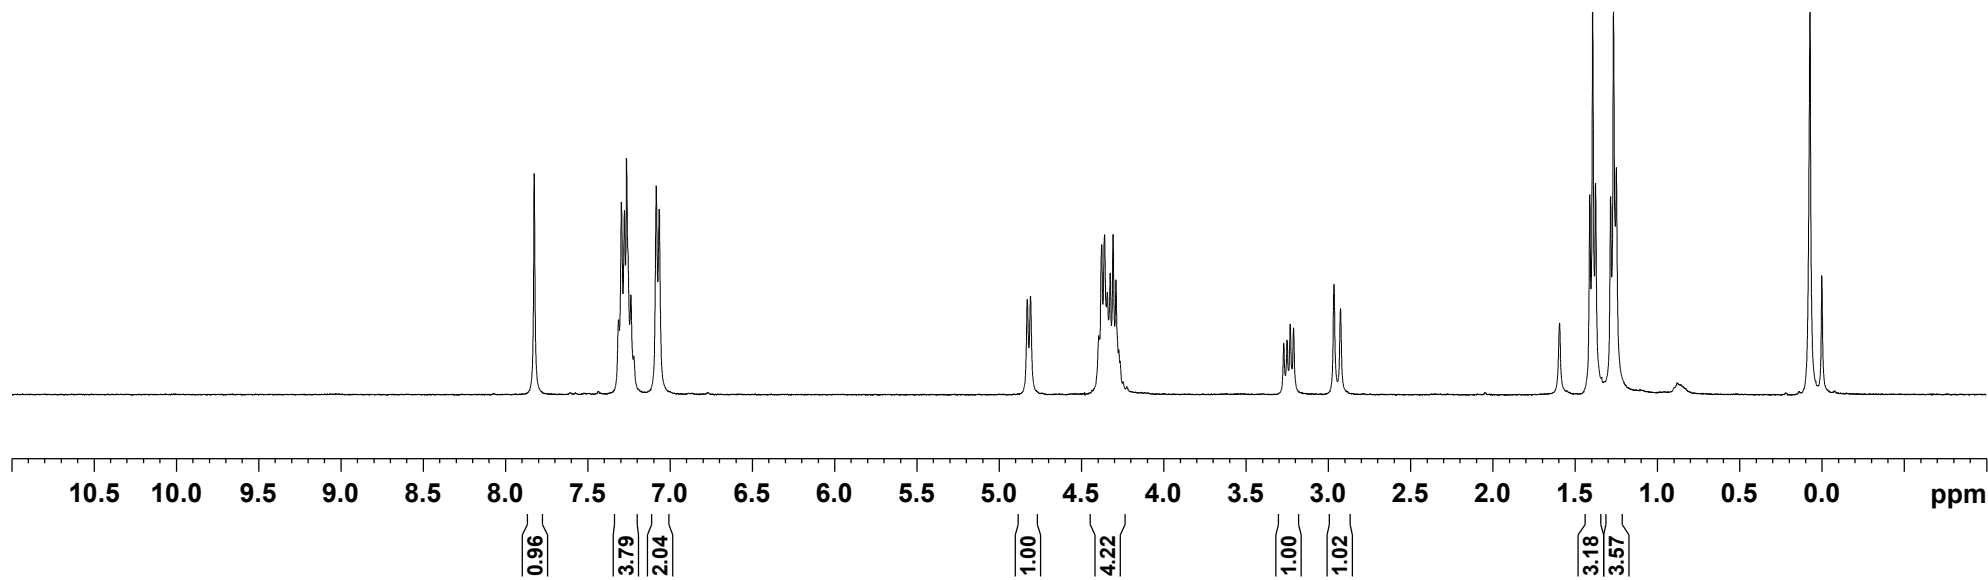

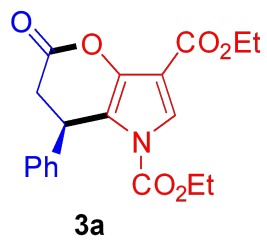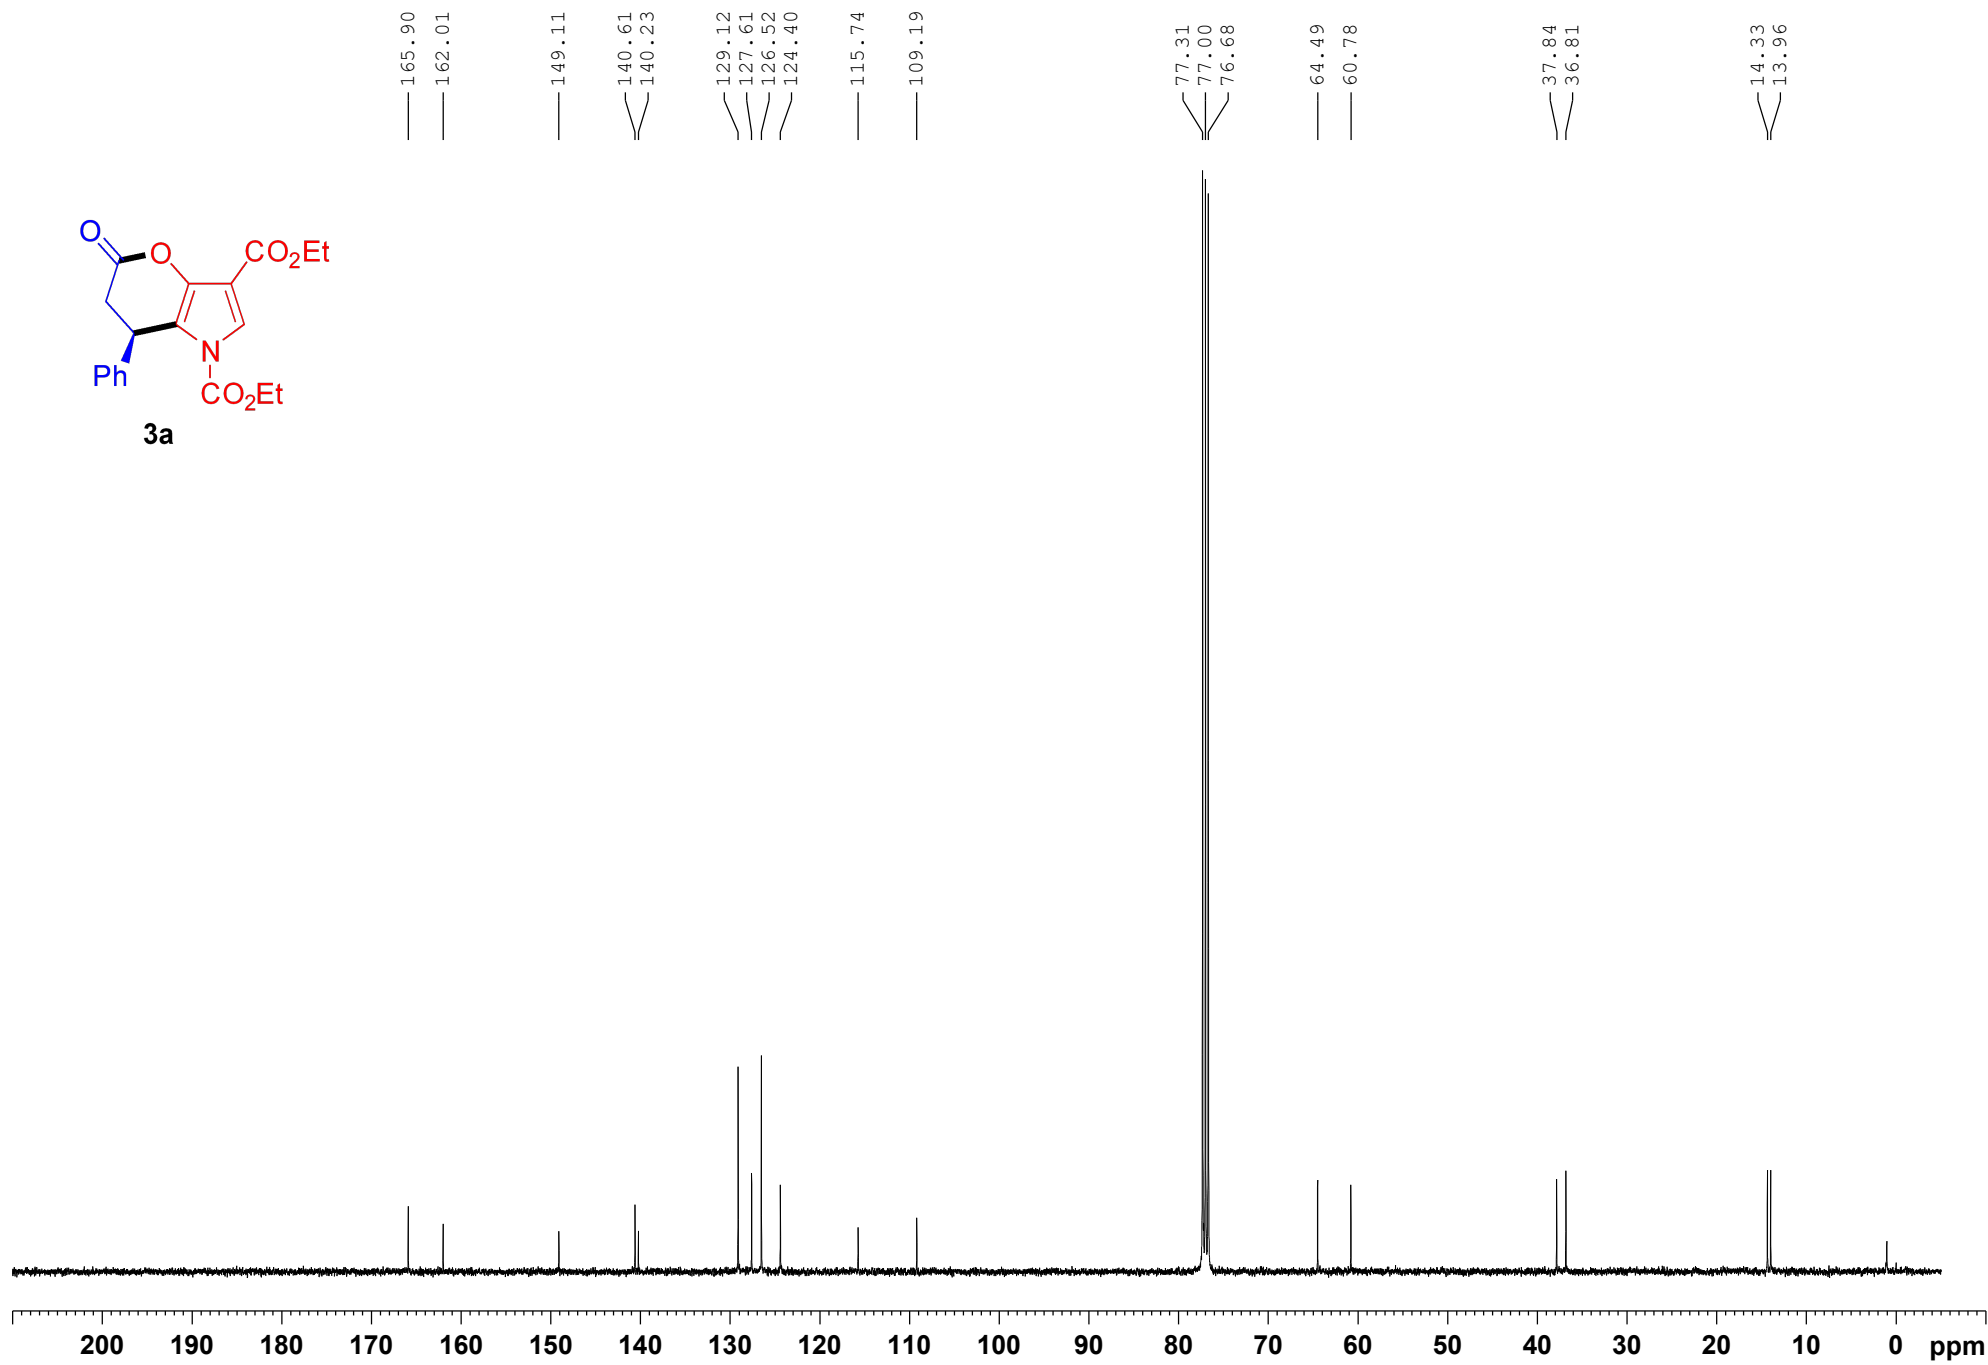

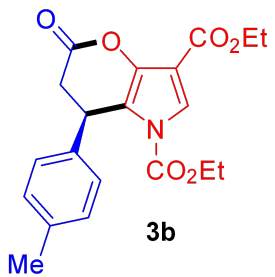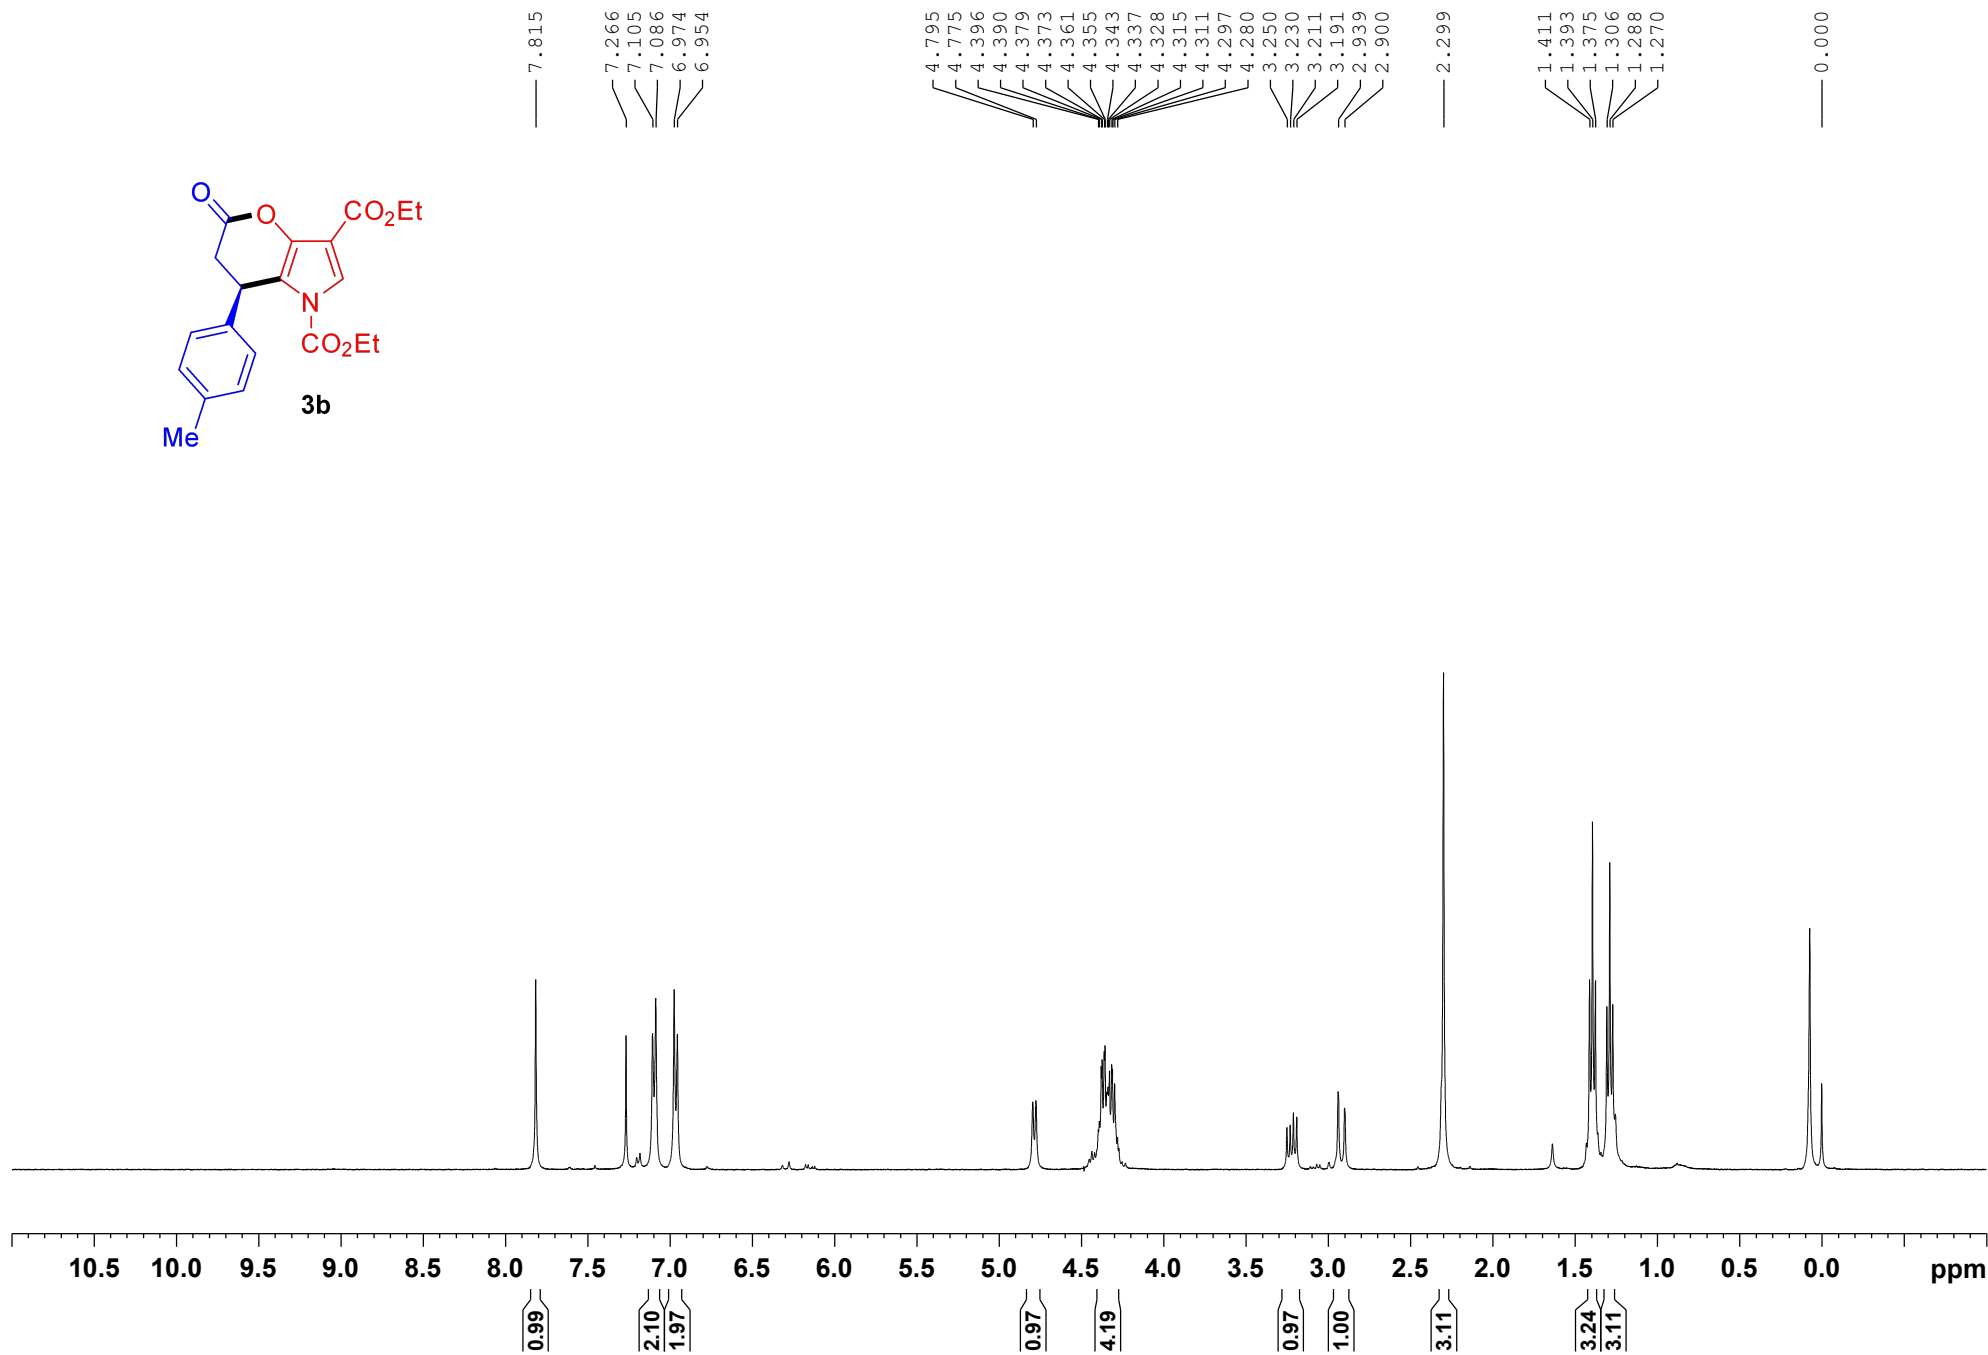

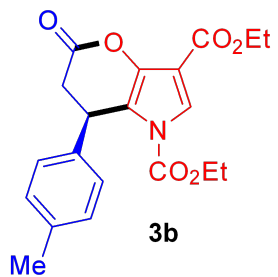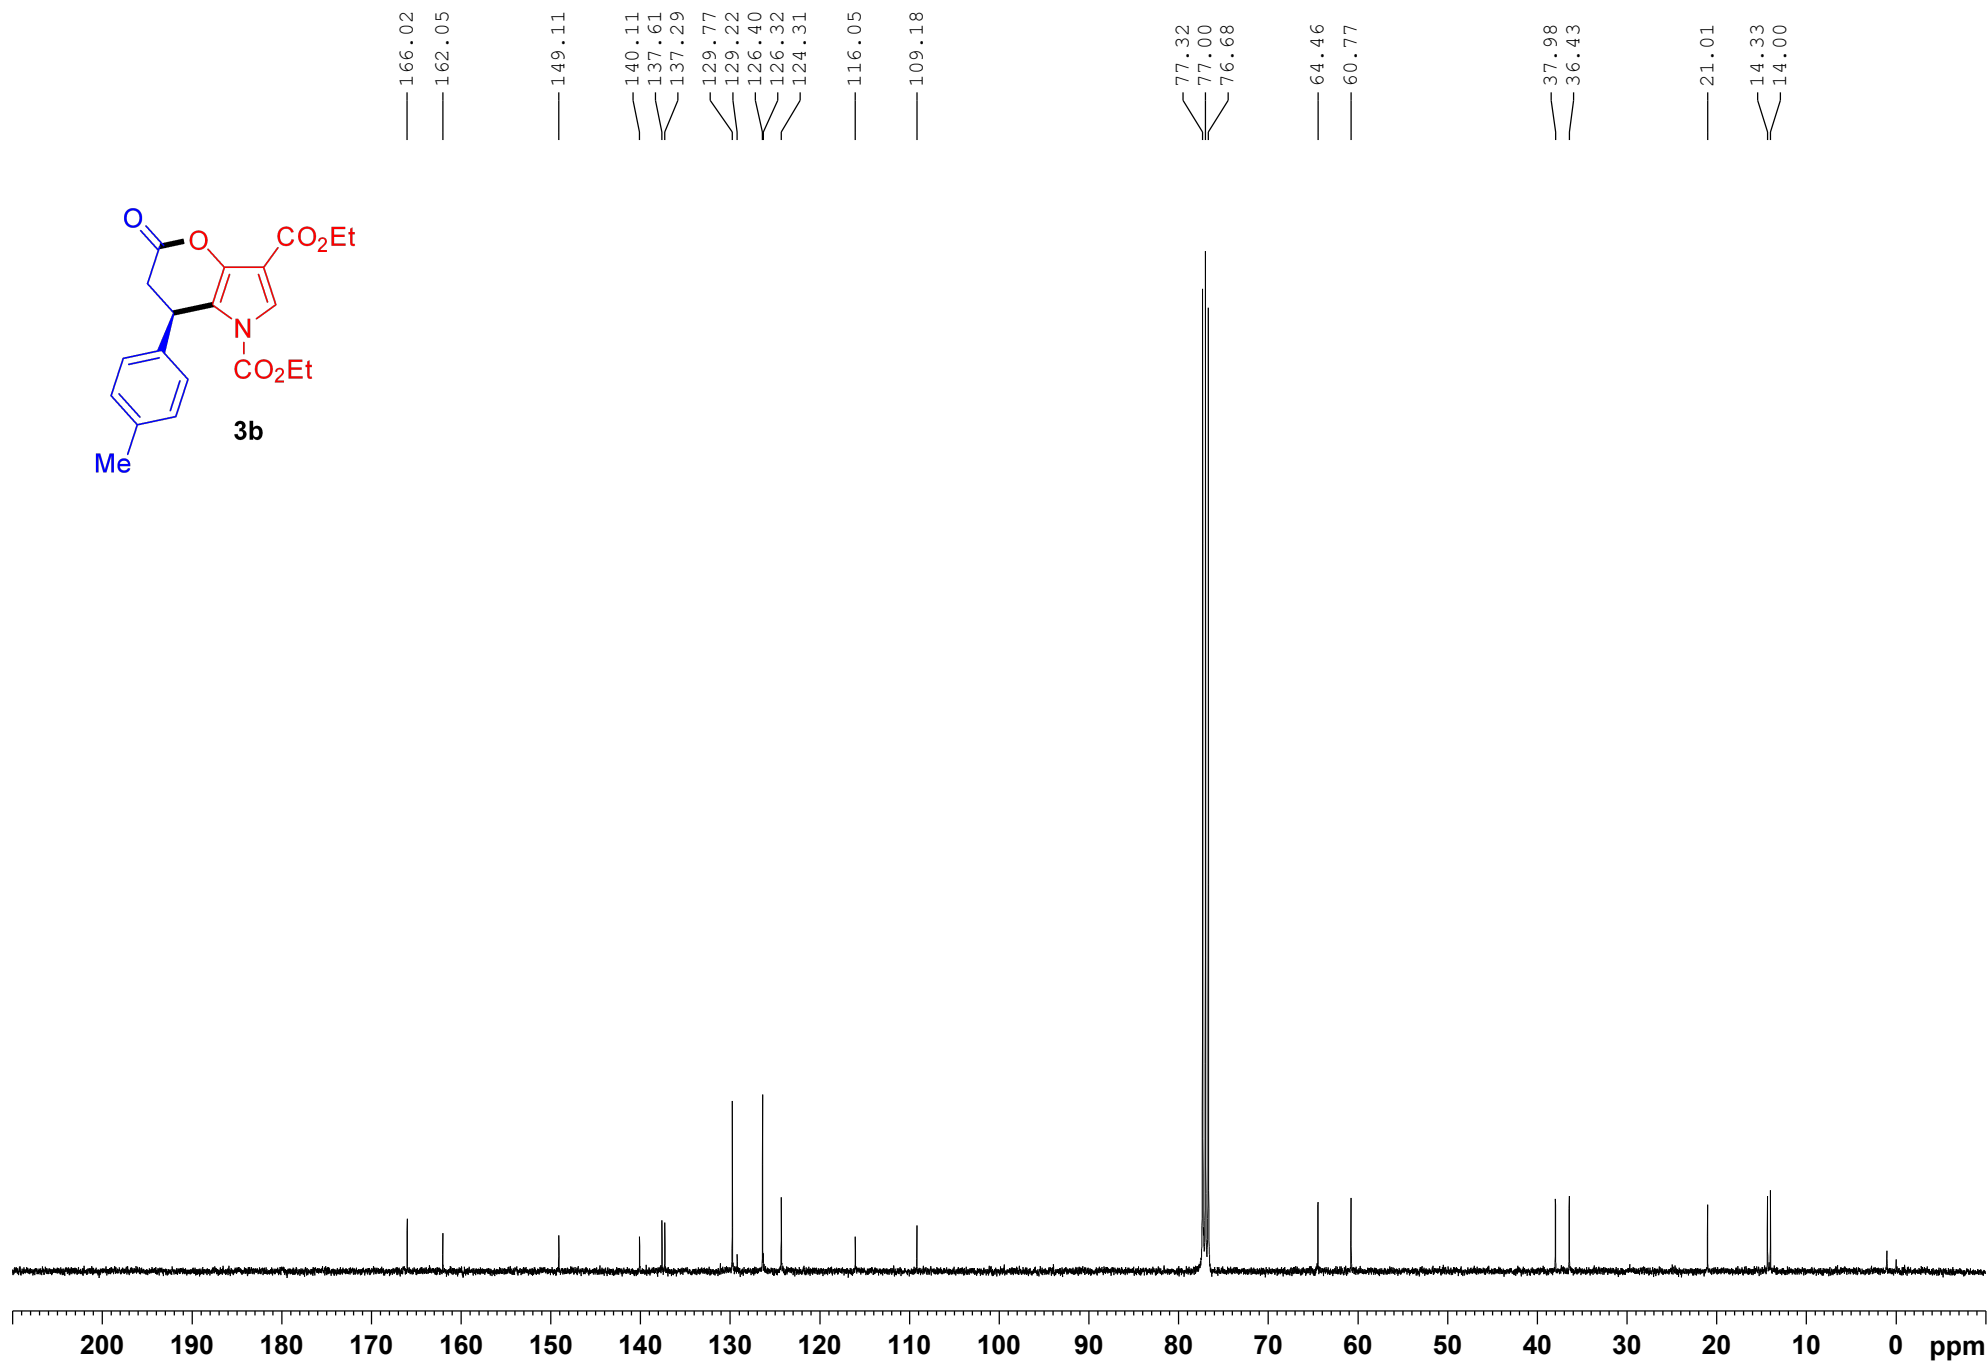

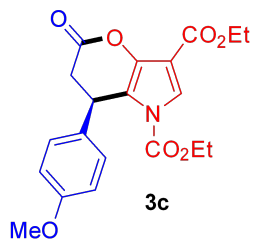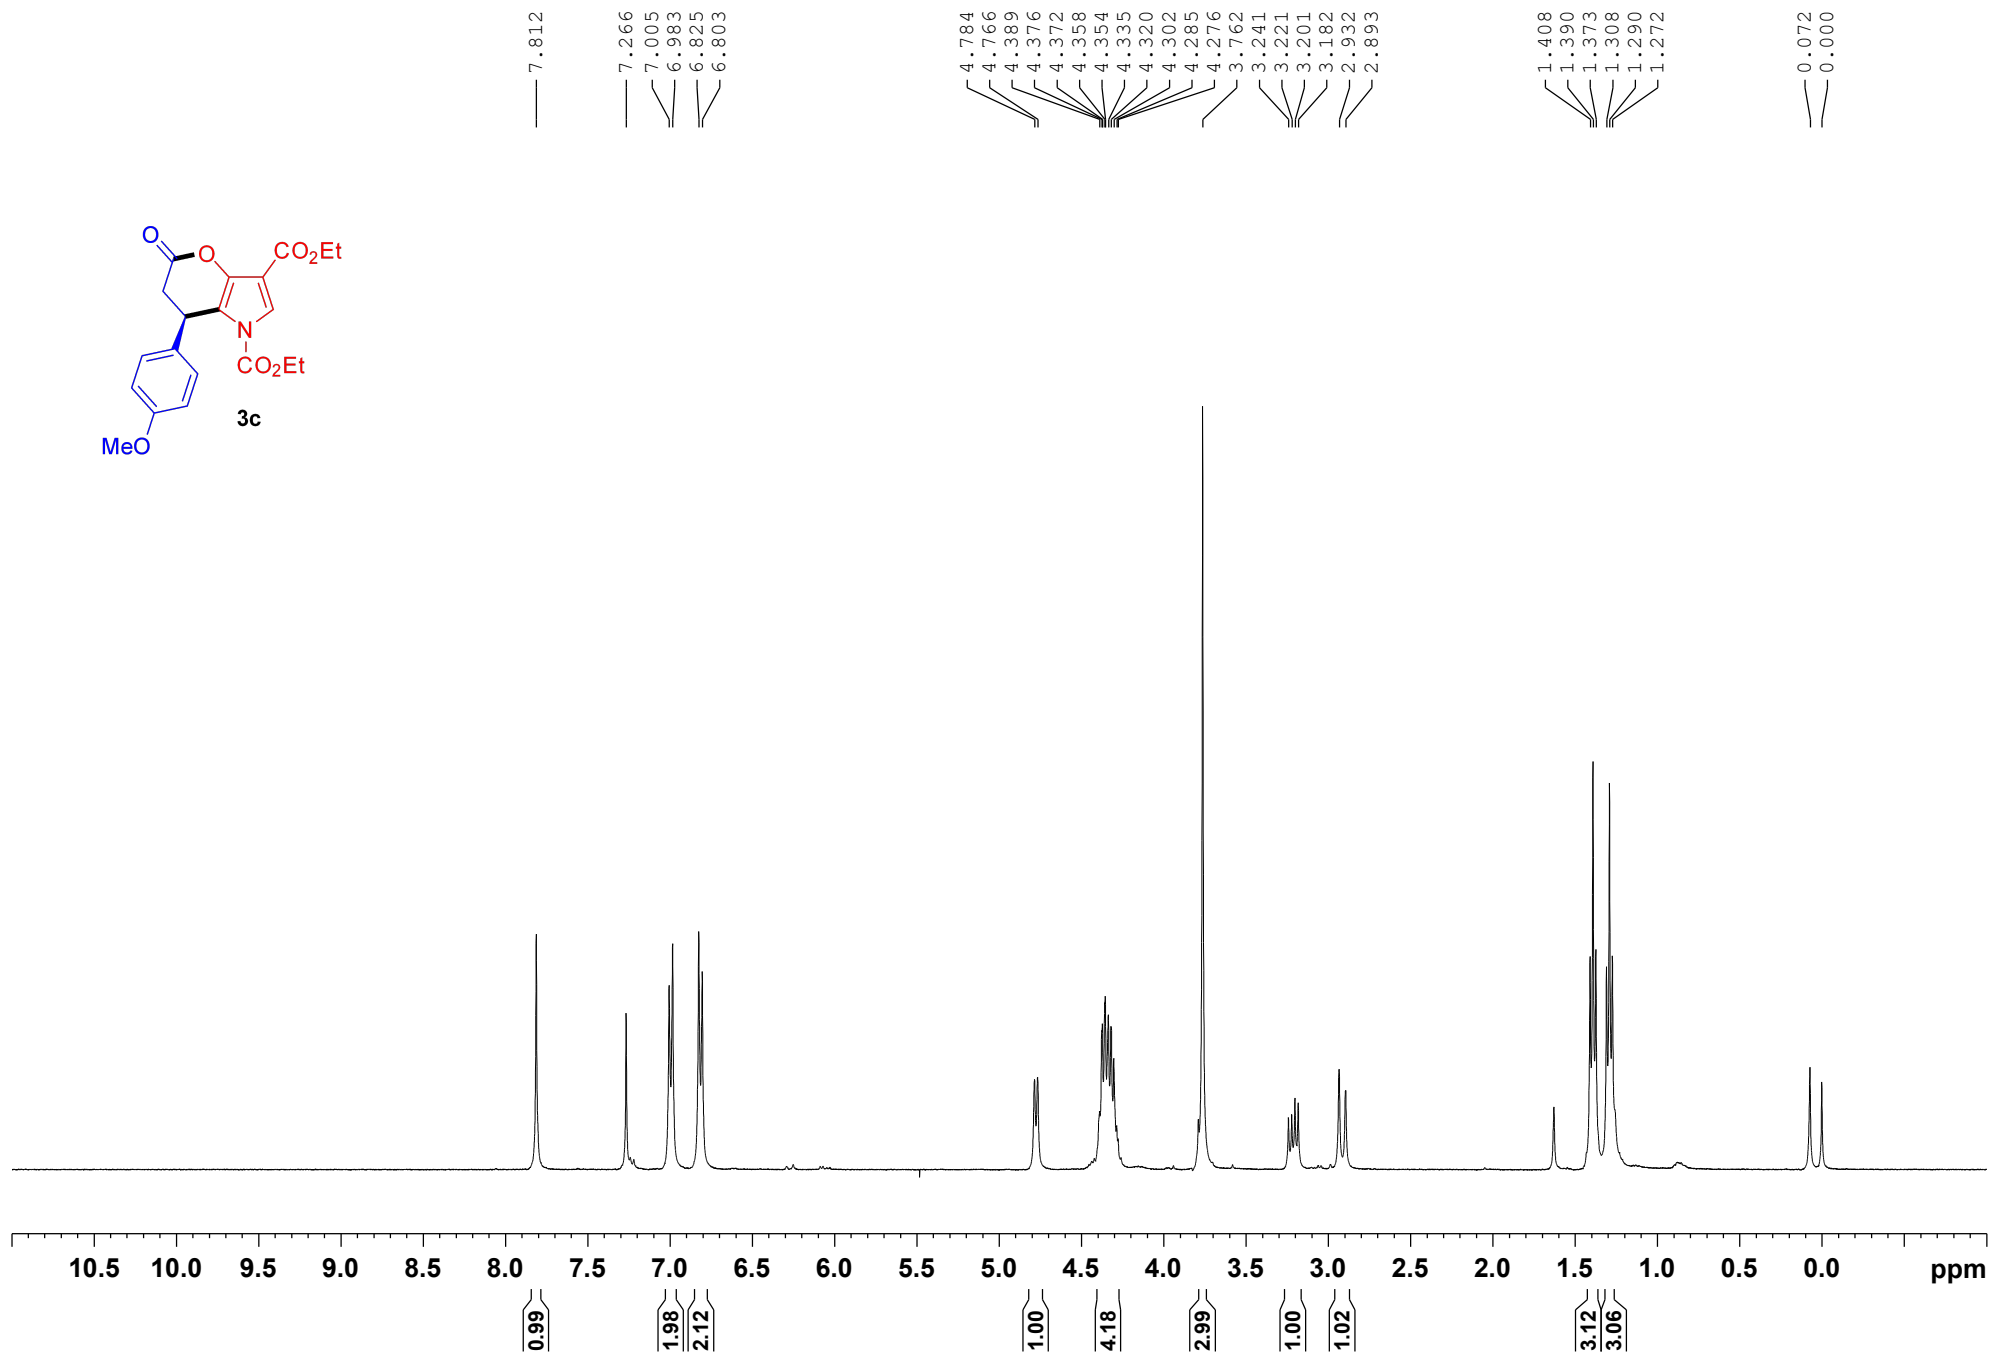

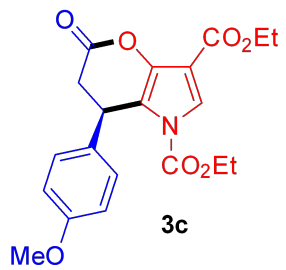

166.05  
162.02  
158.92

149.10

140.01

132.68

127.61

124.30

116.22

114.42

109.18

77.31  
77.00  
76.68

64.46

60.75

55.23

38.08  
36.03

14.32  
14.00

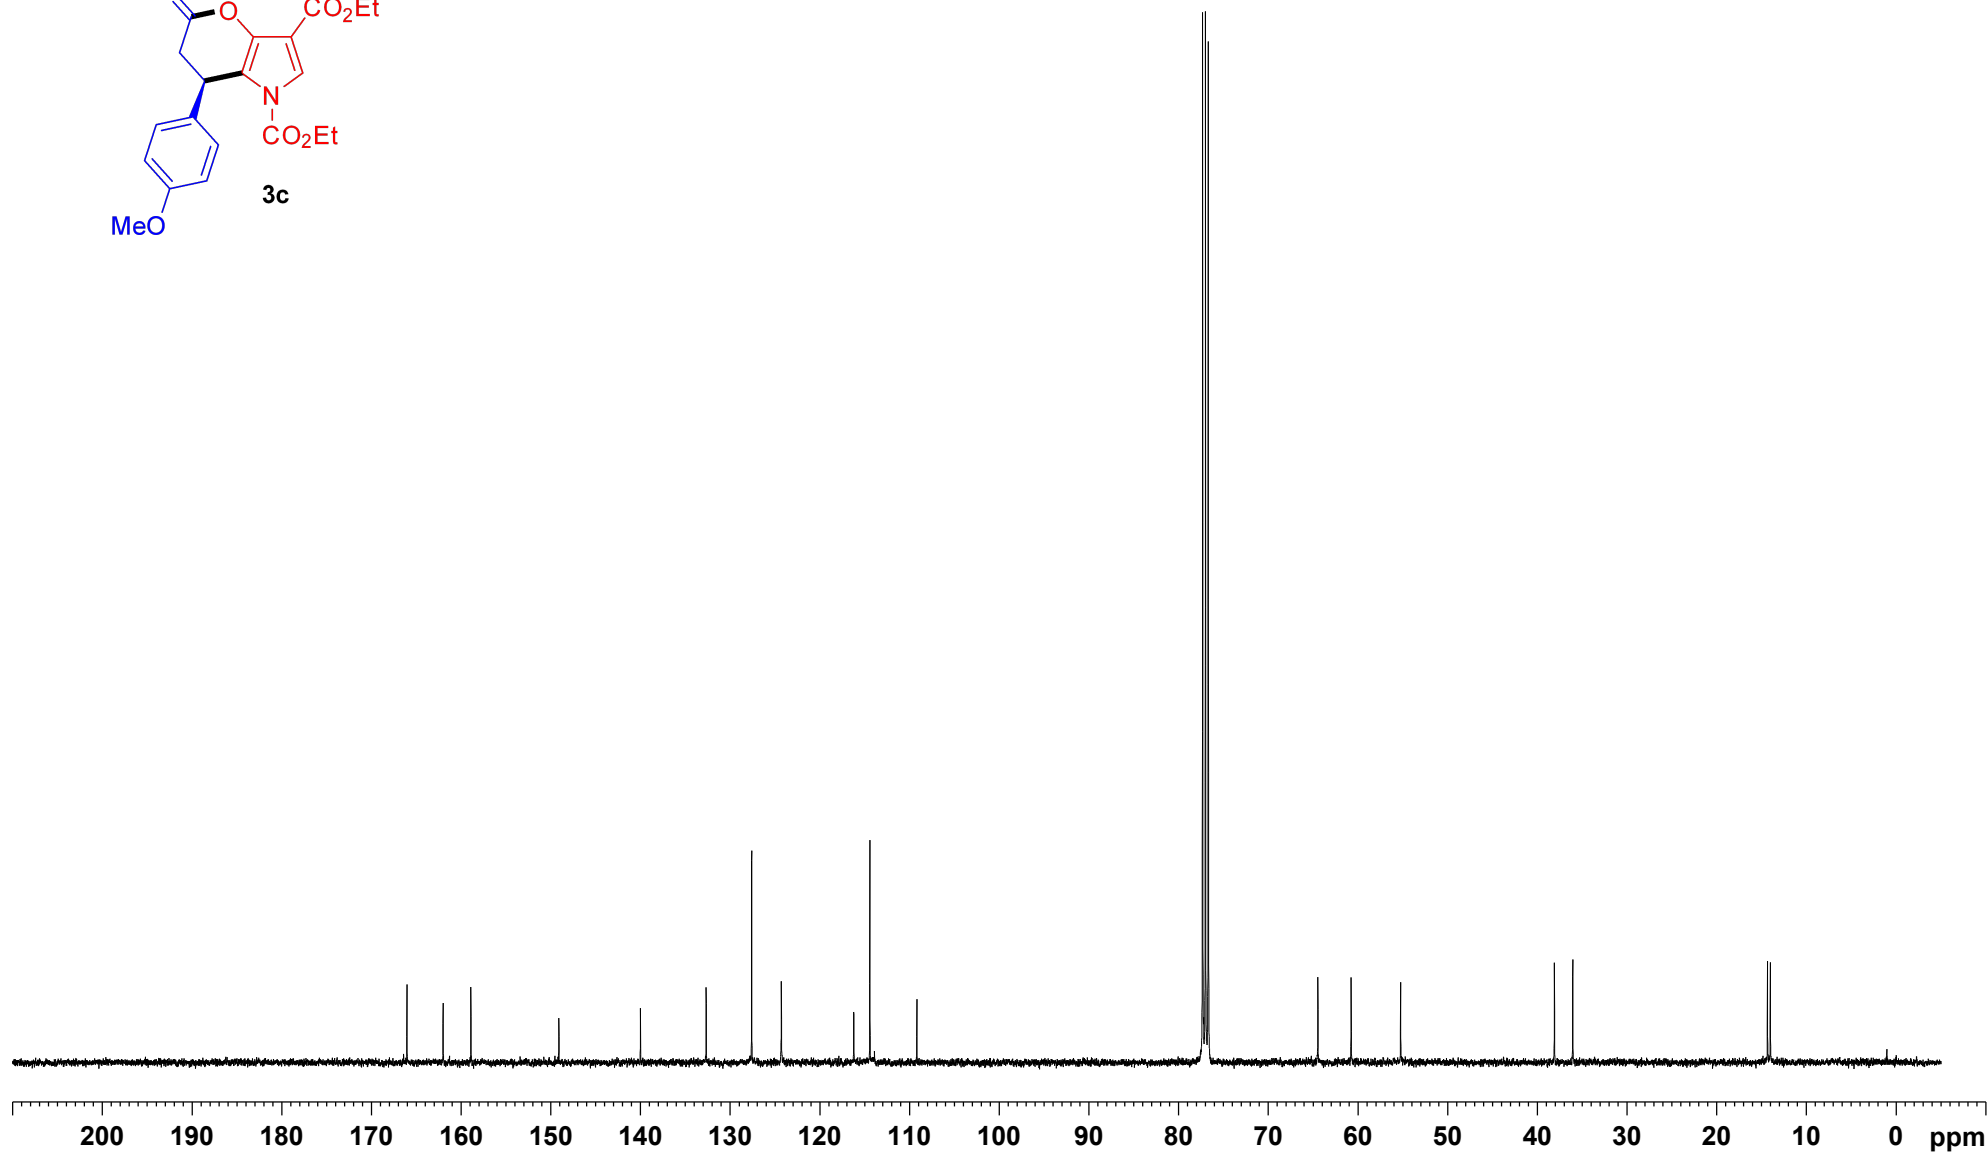



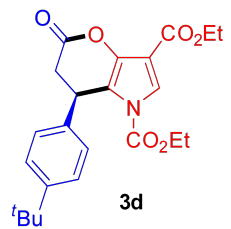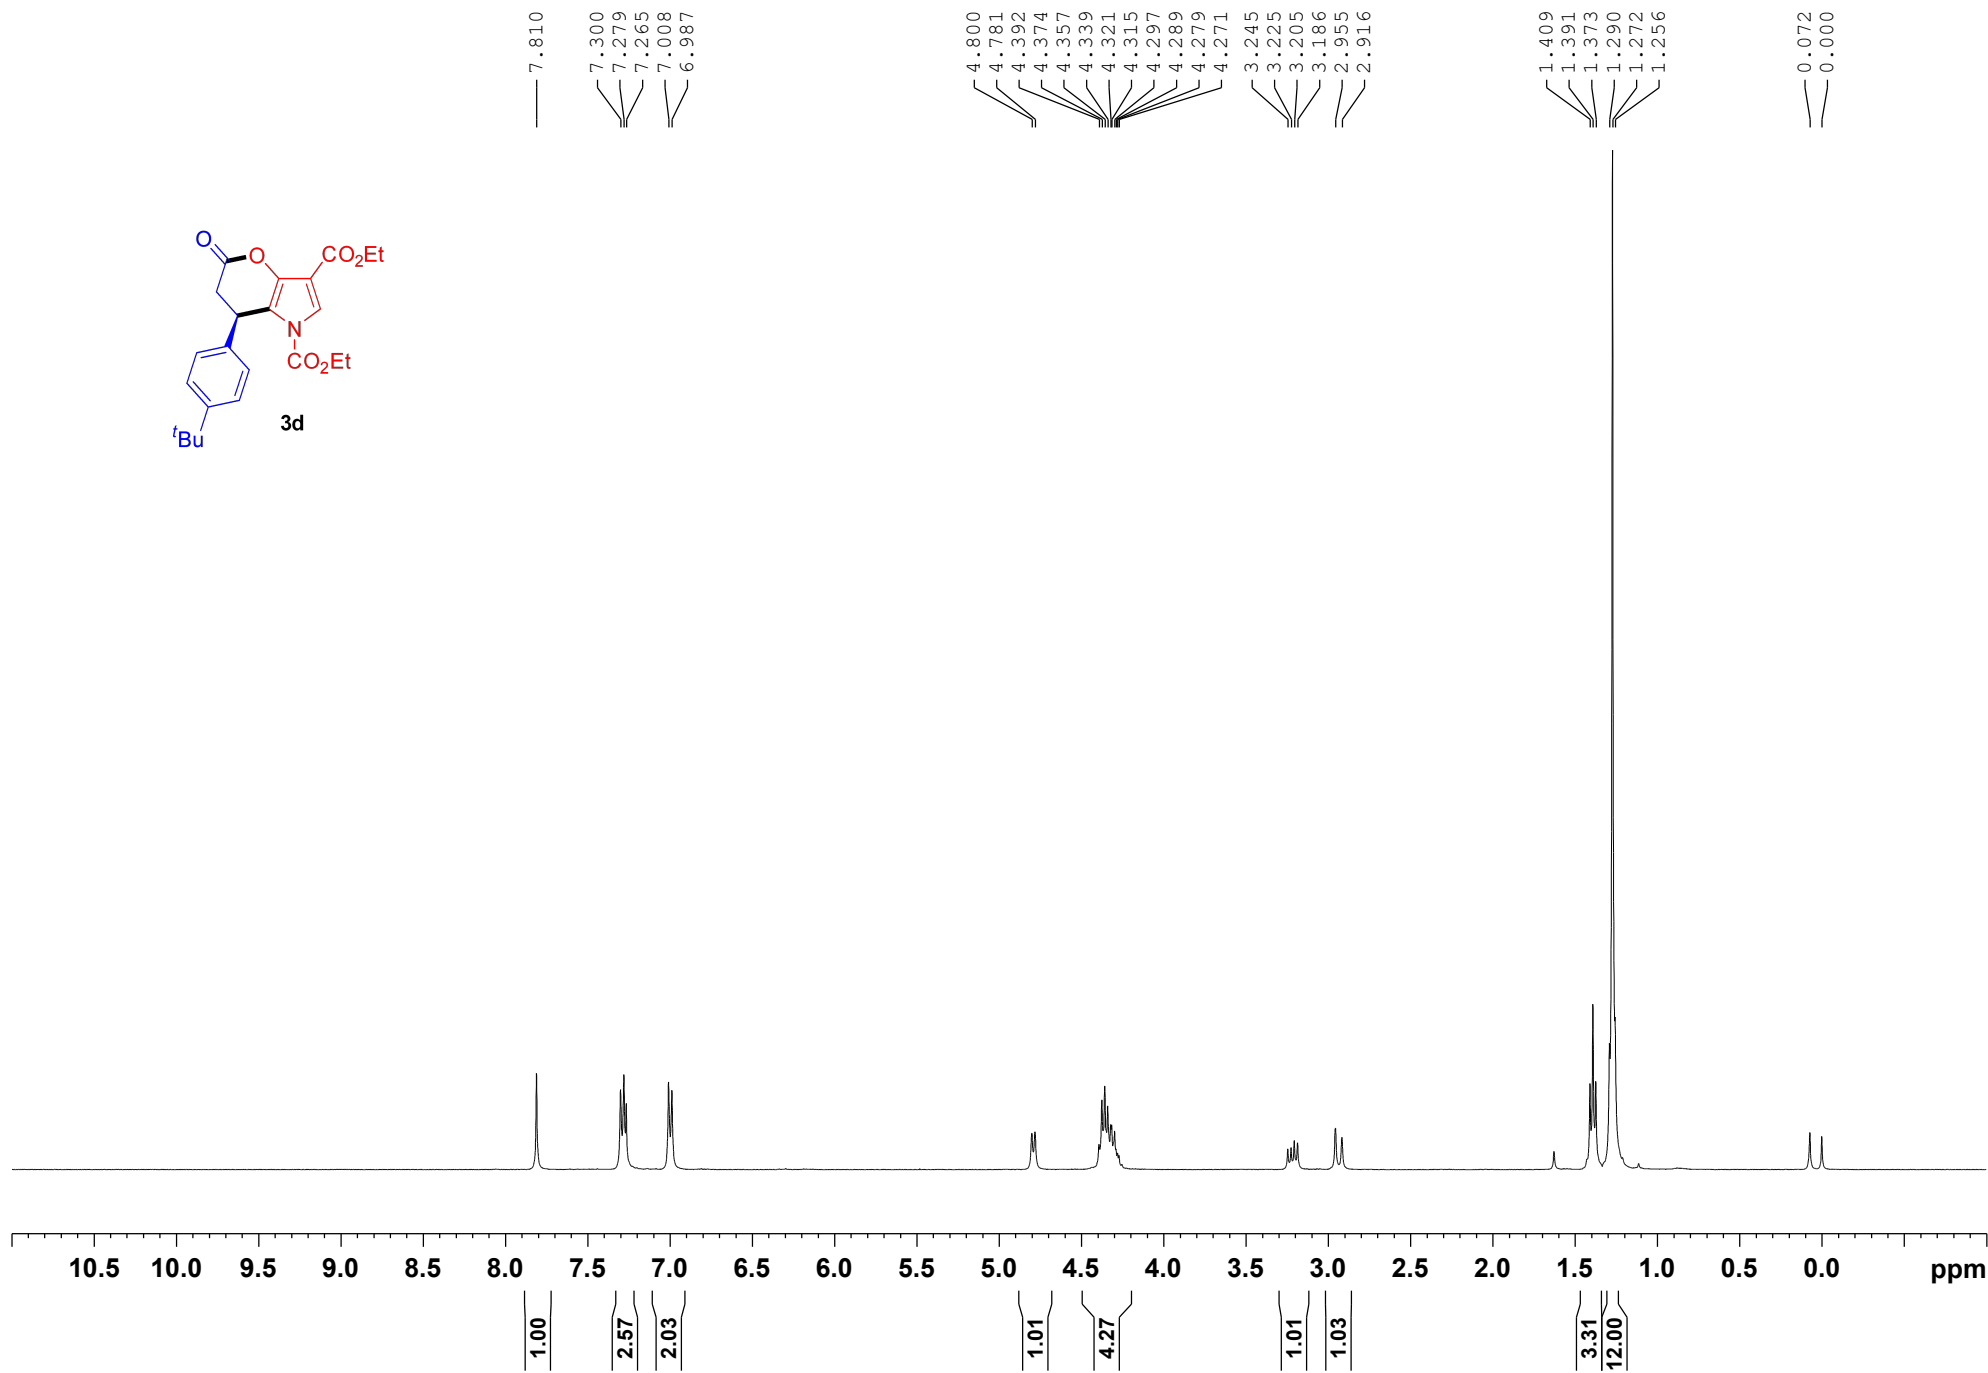

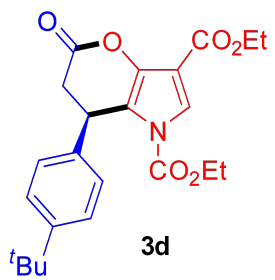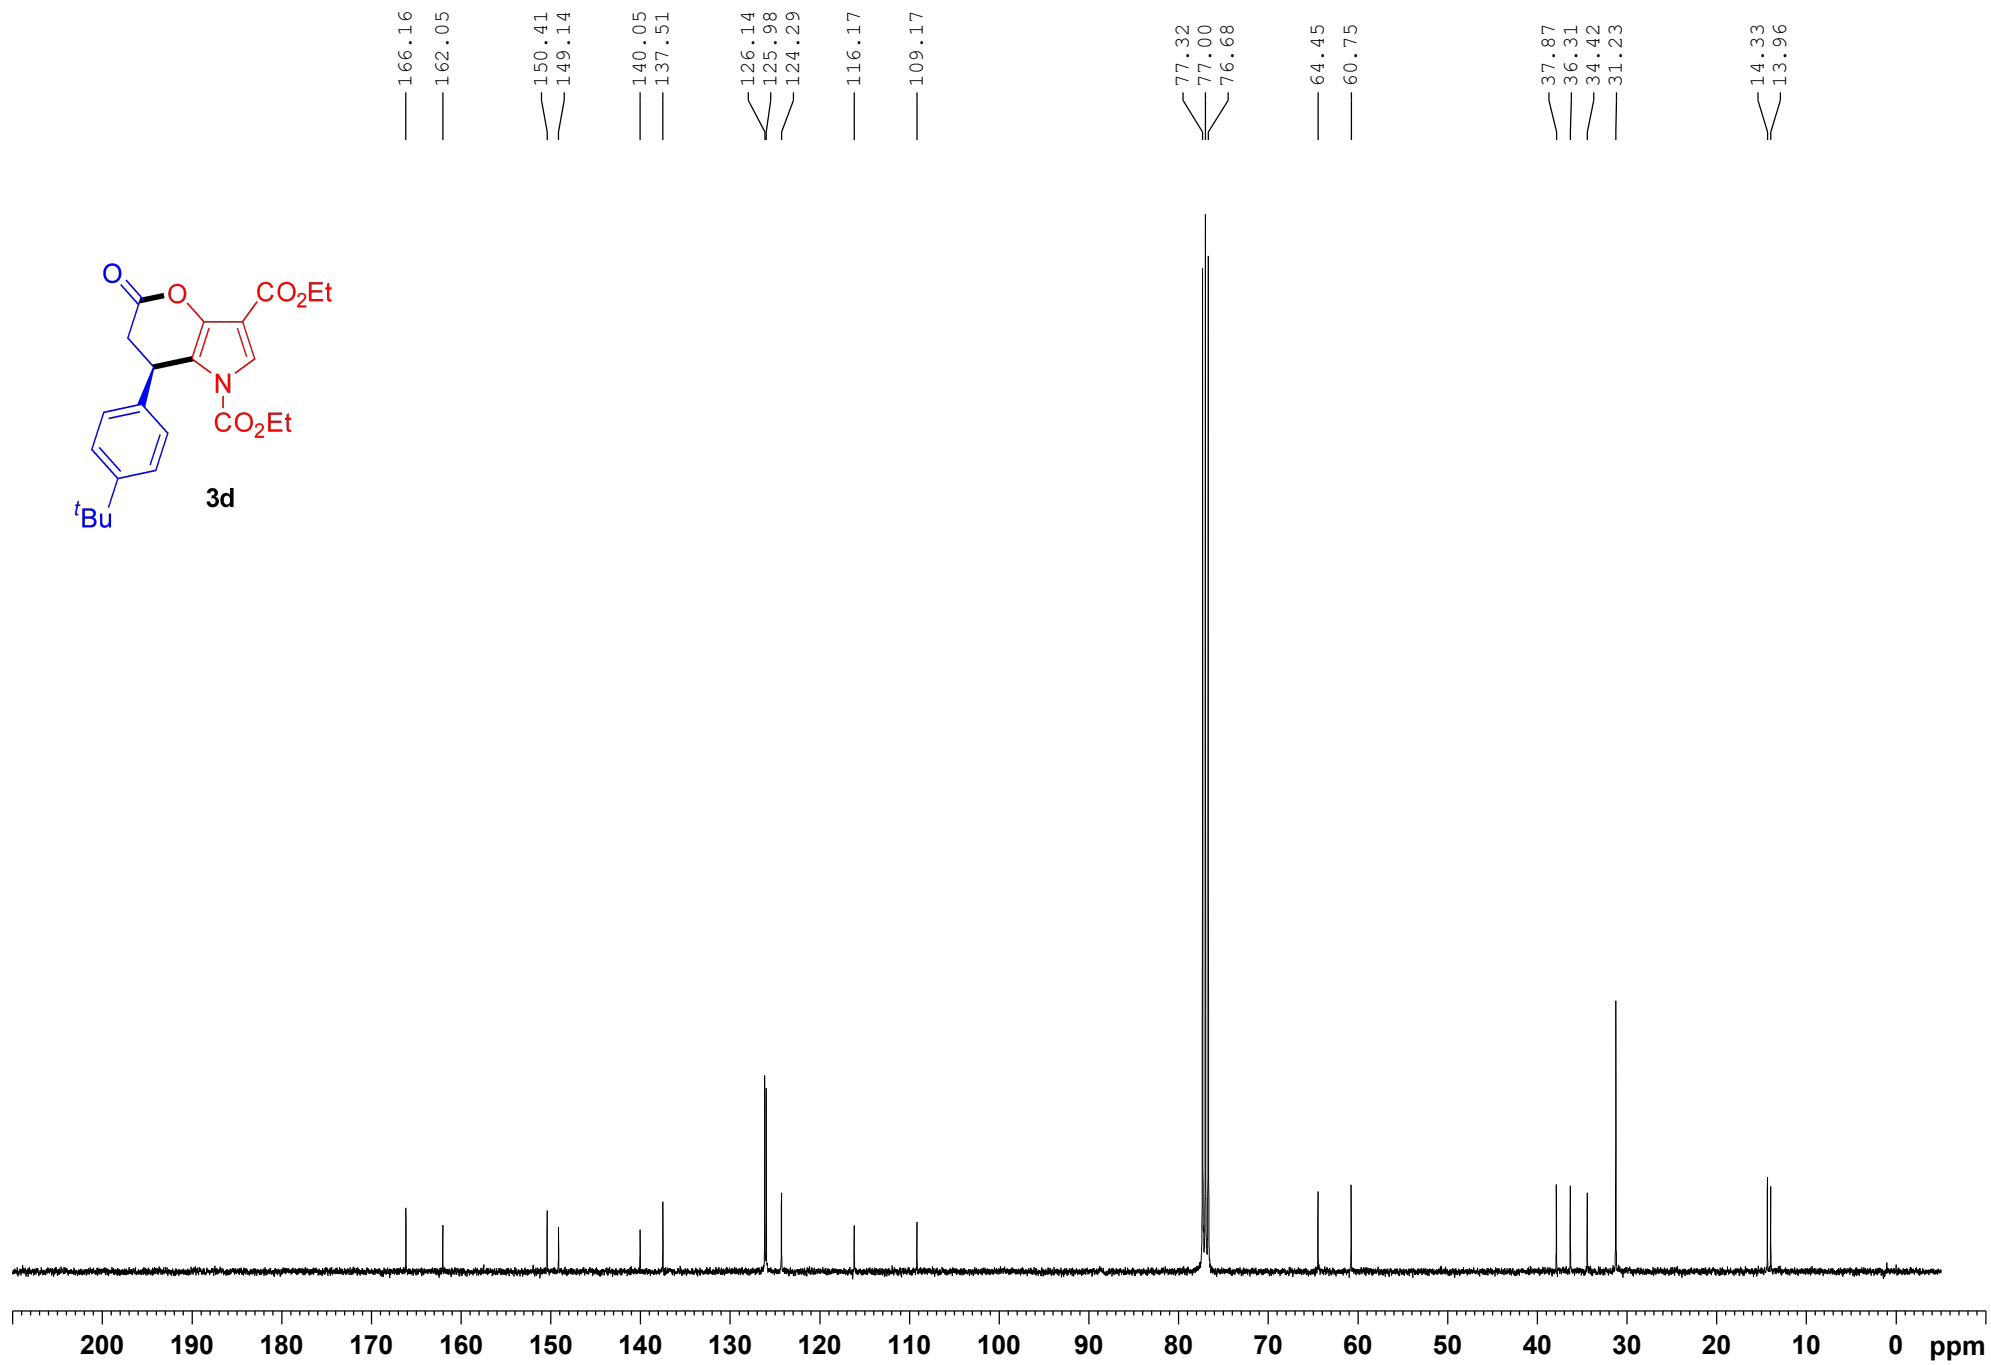

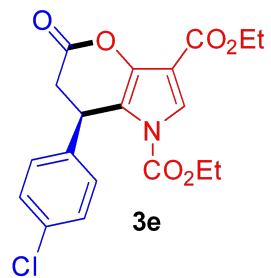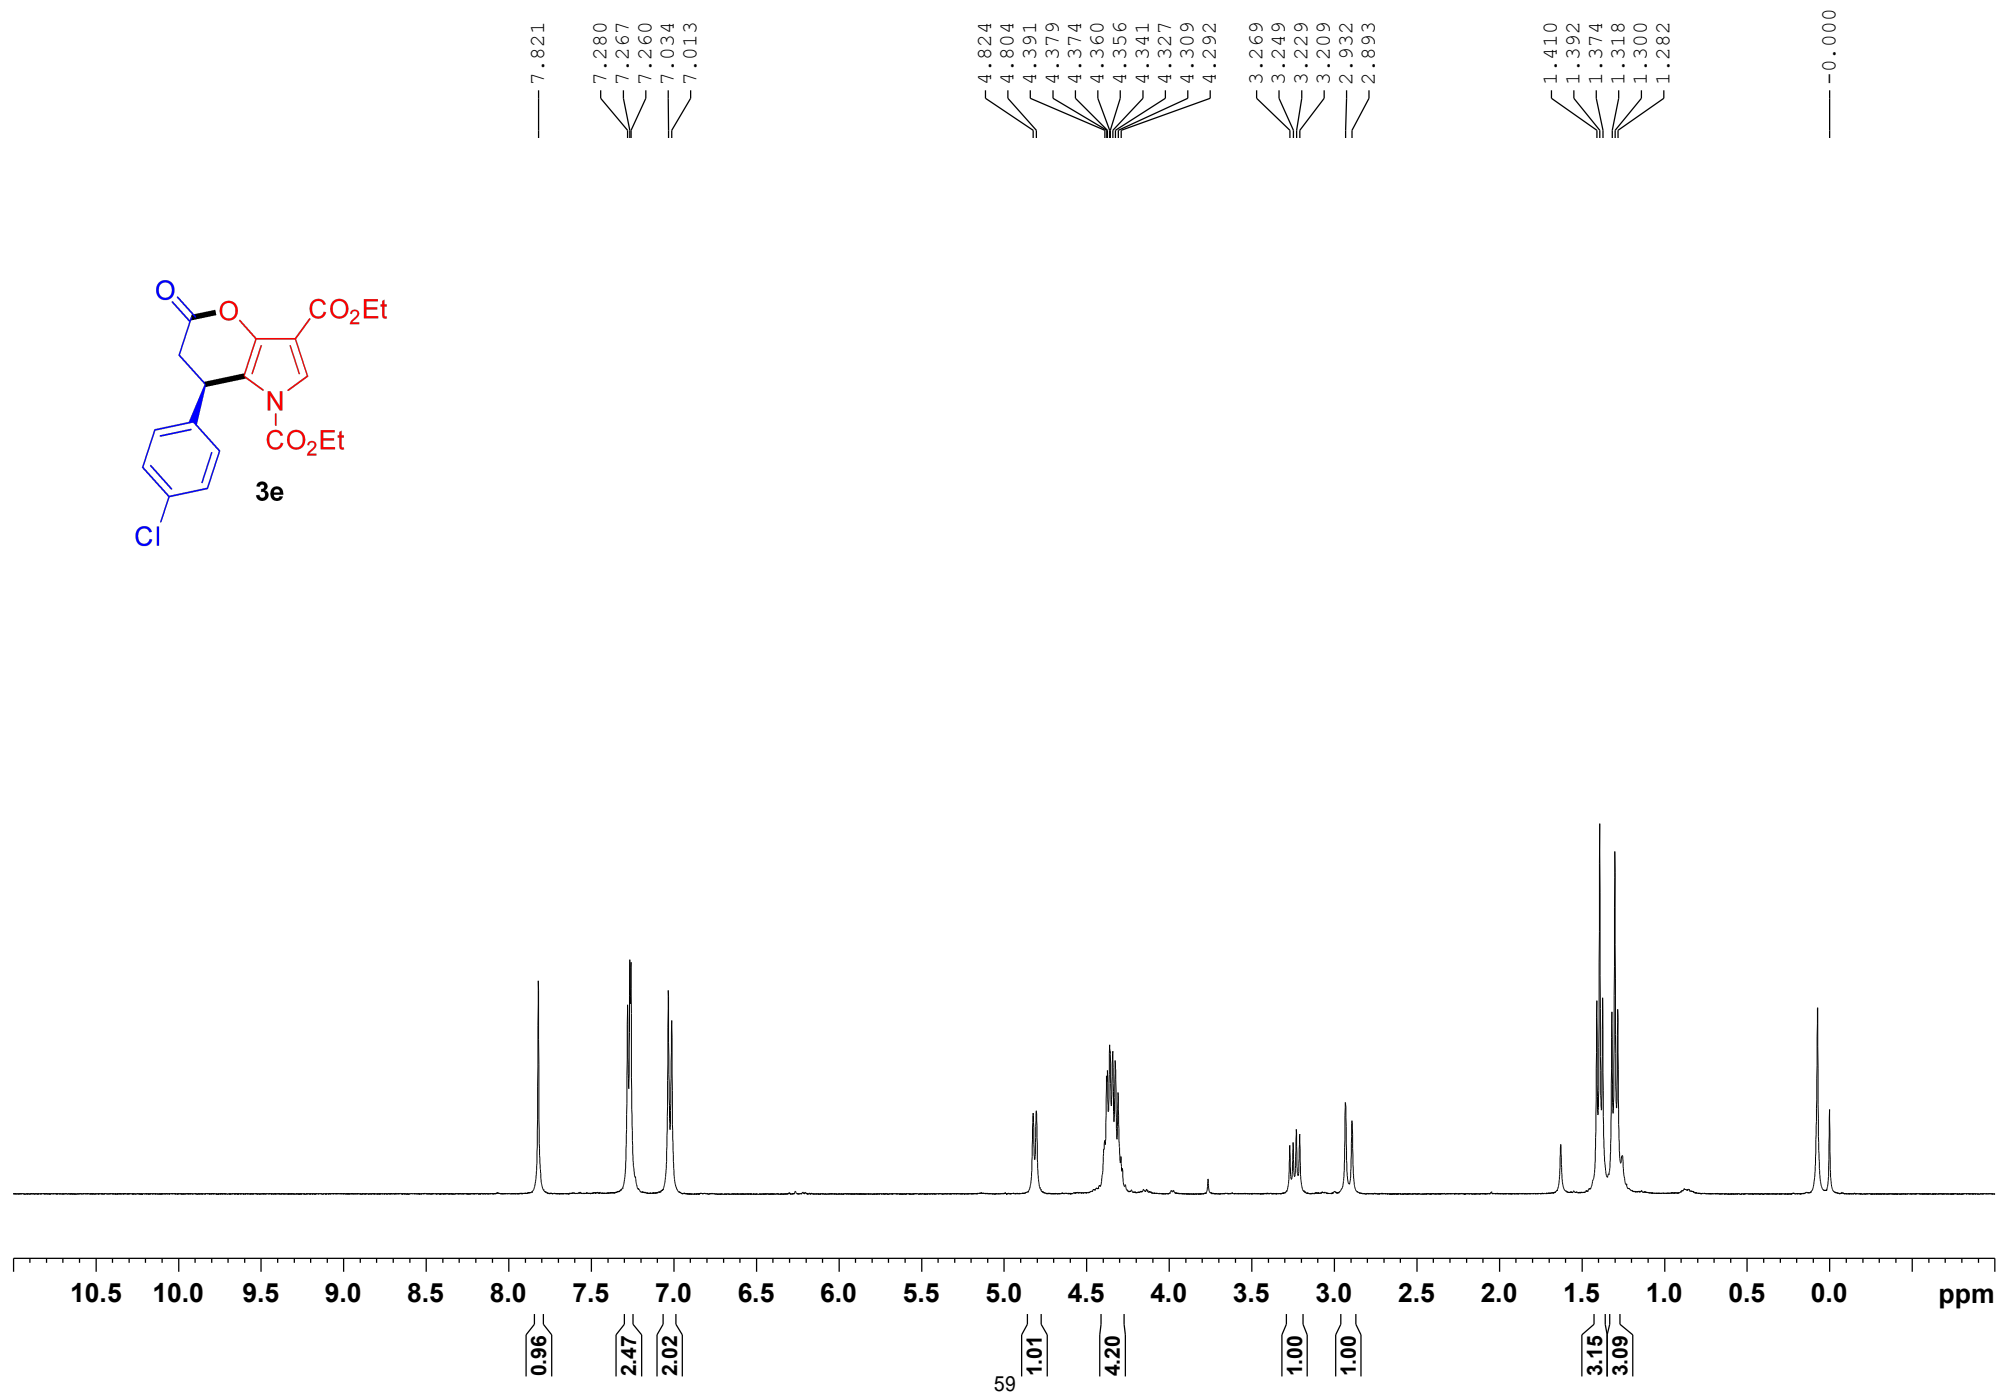

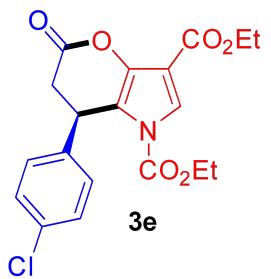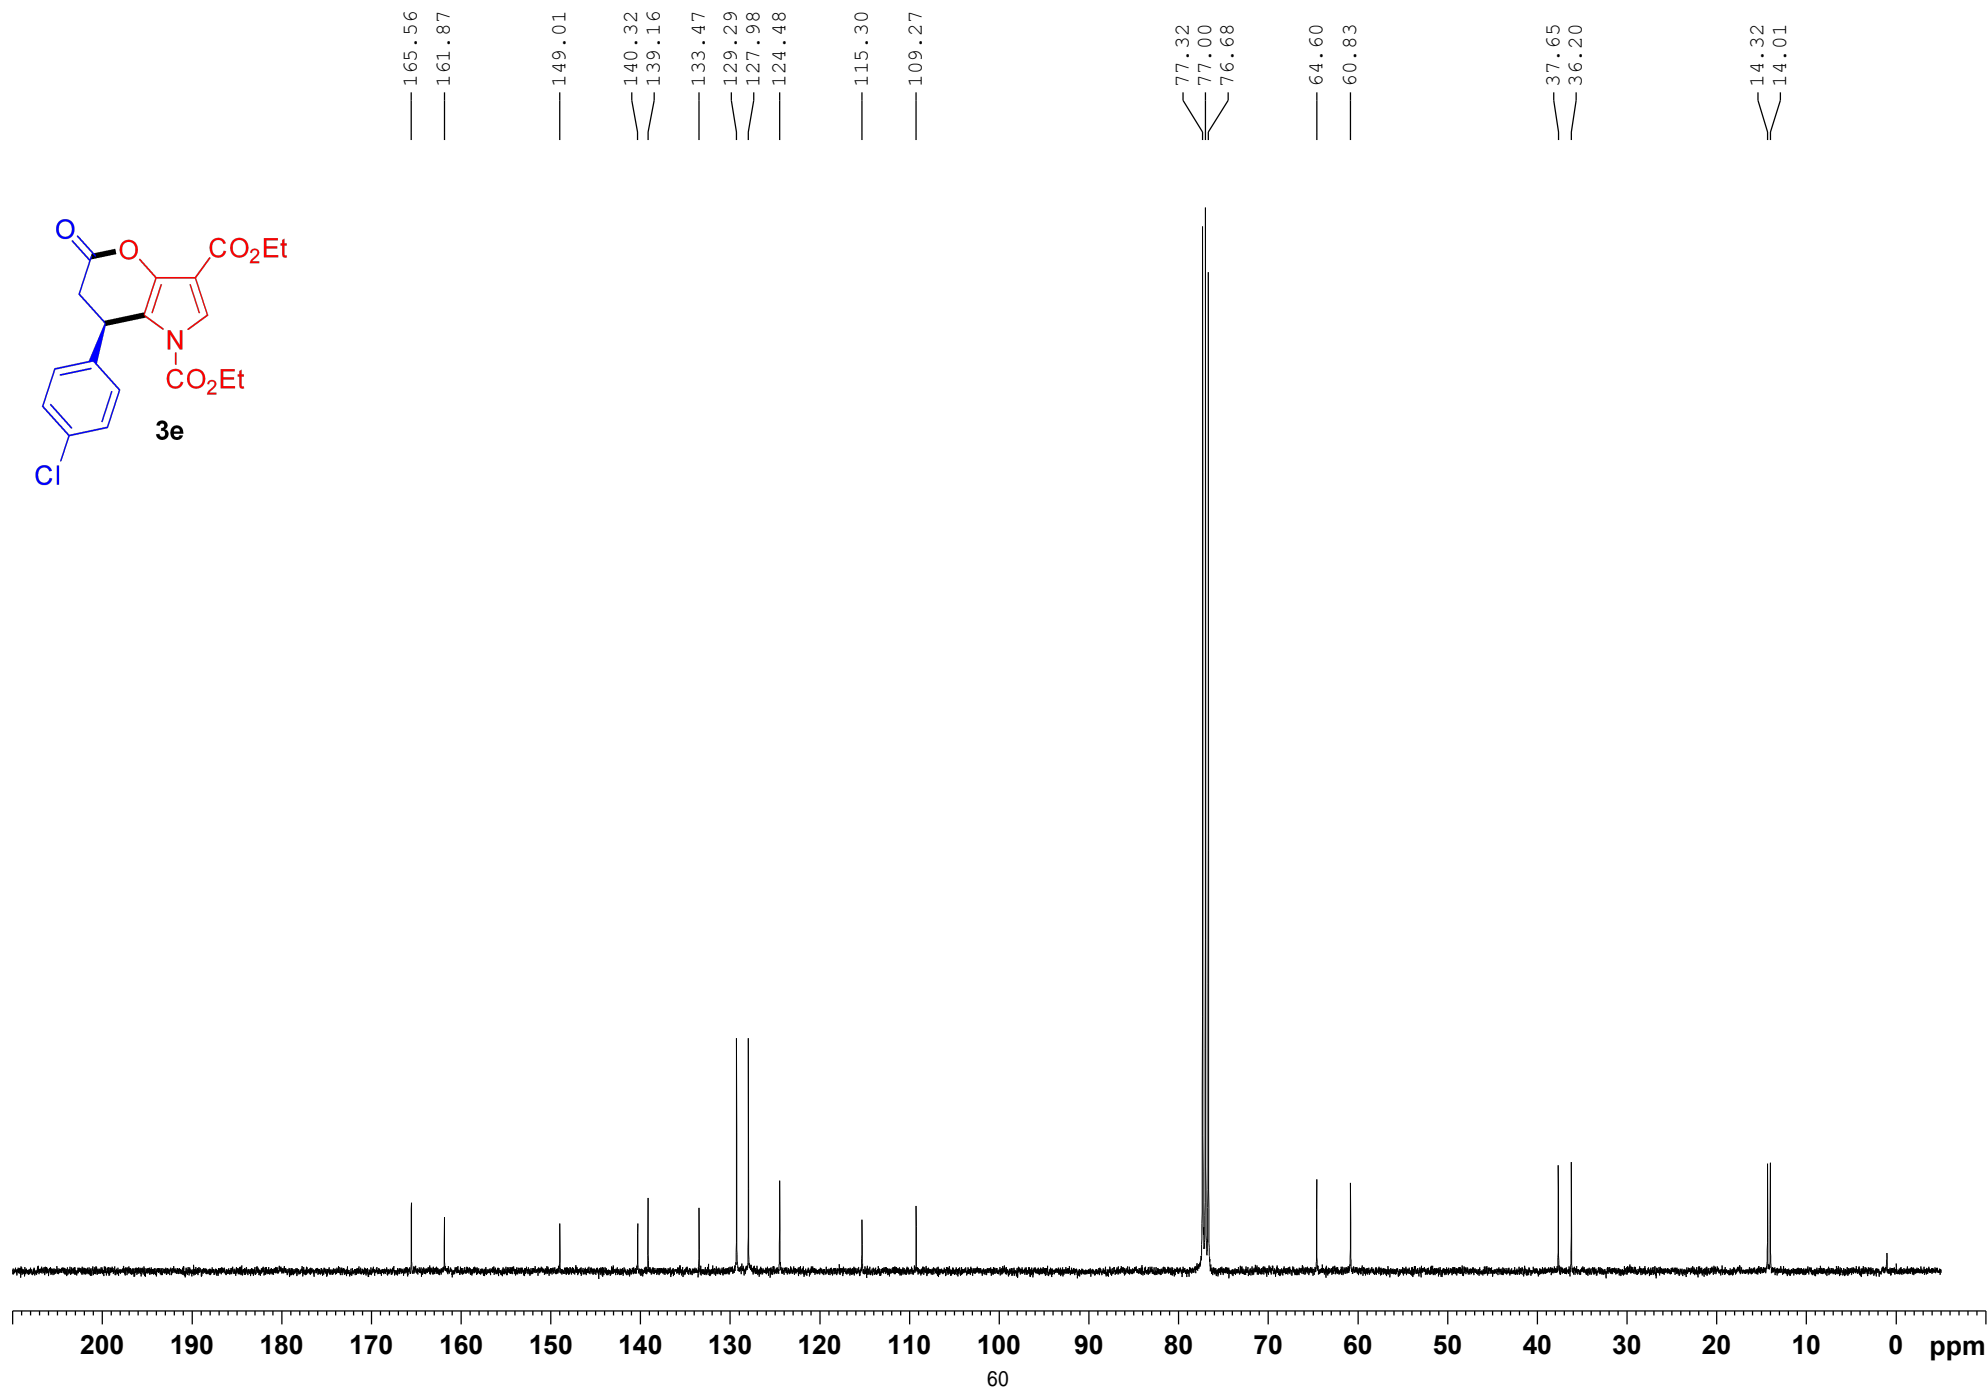

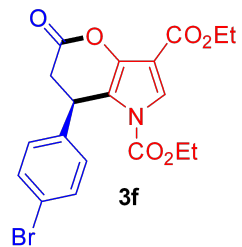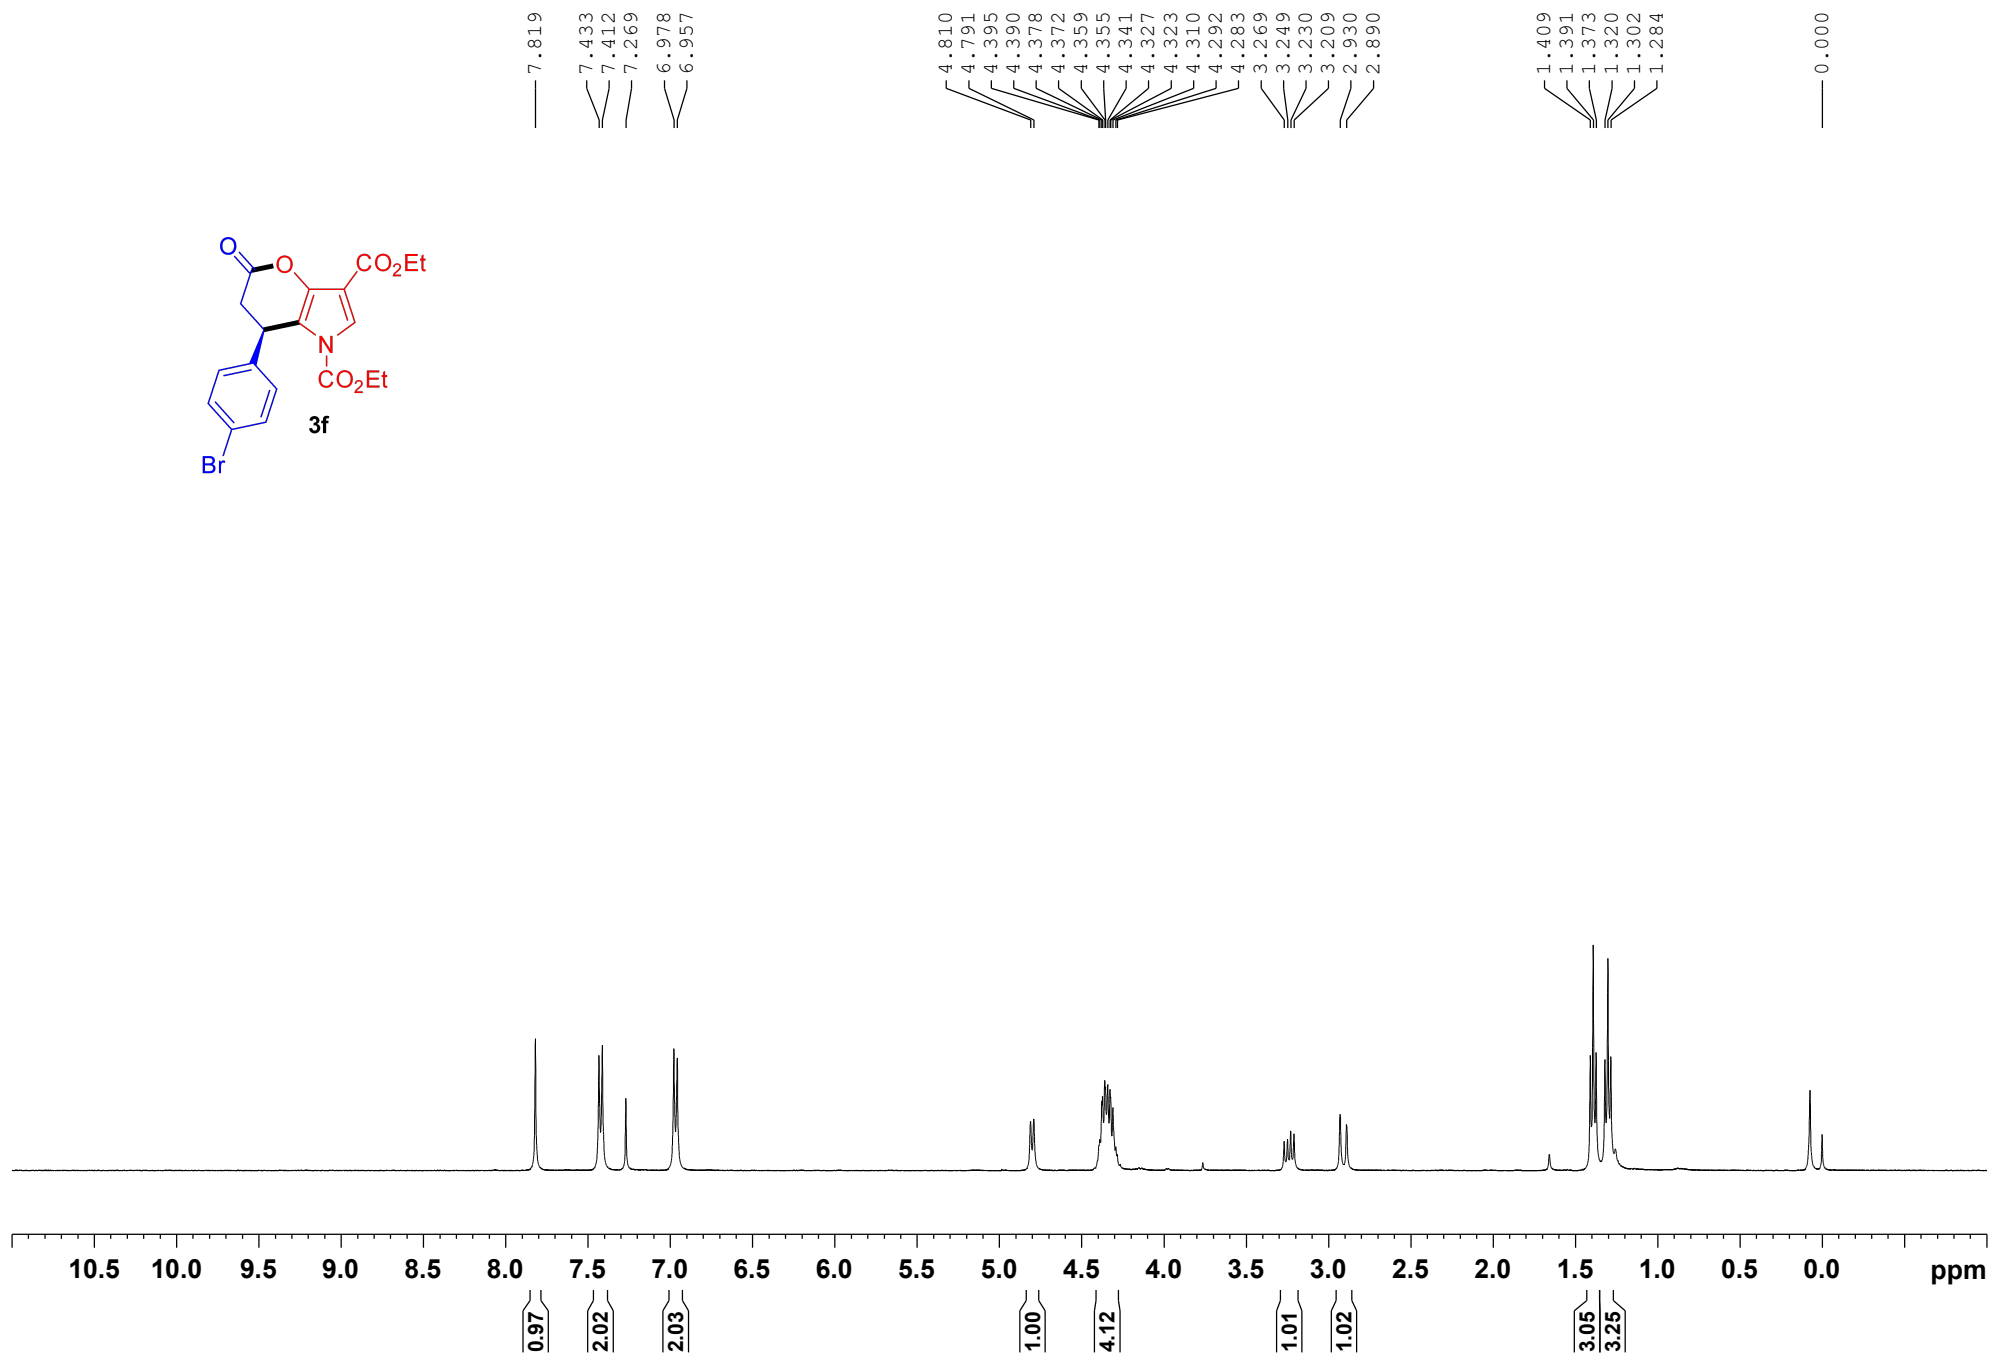

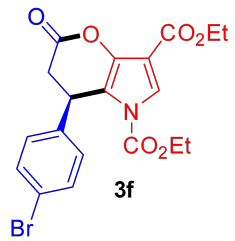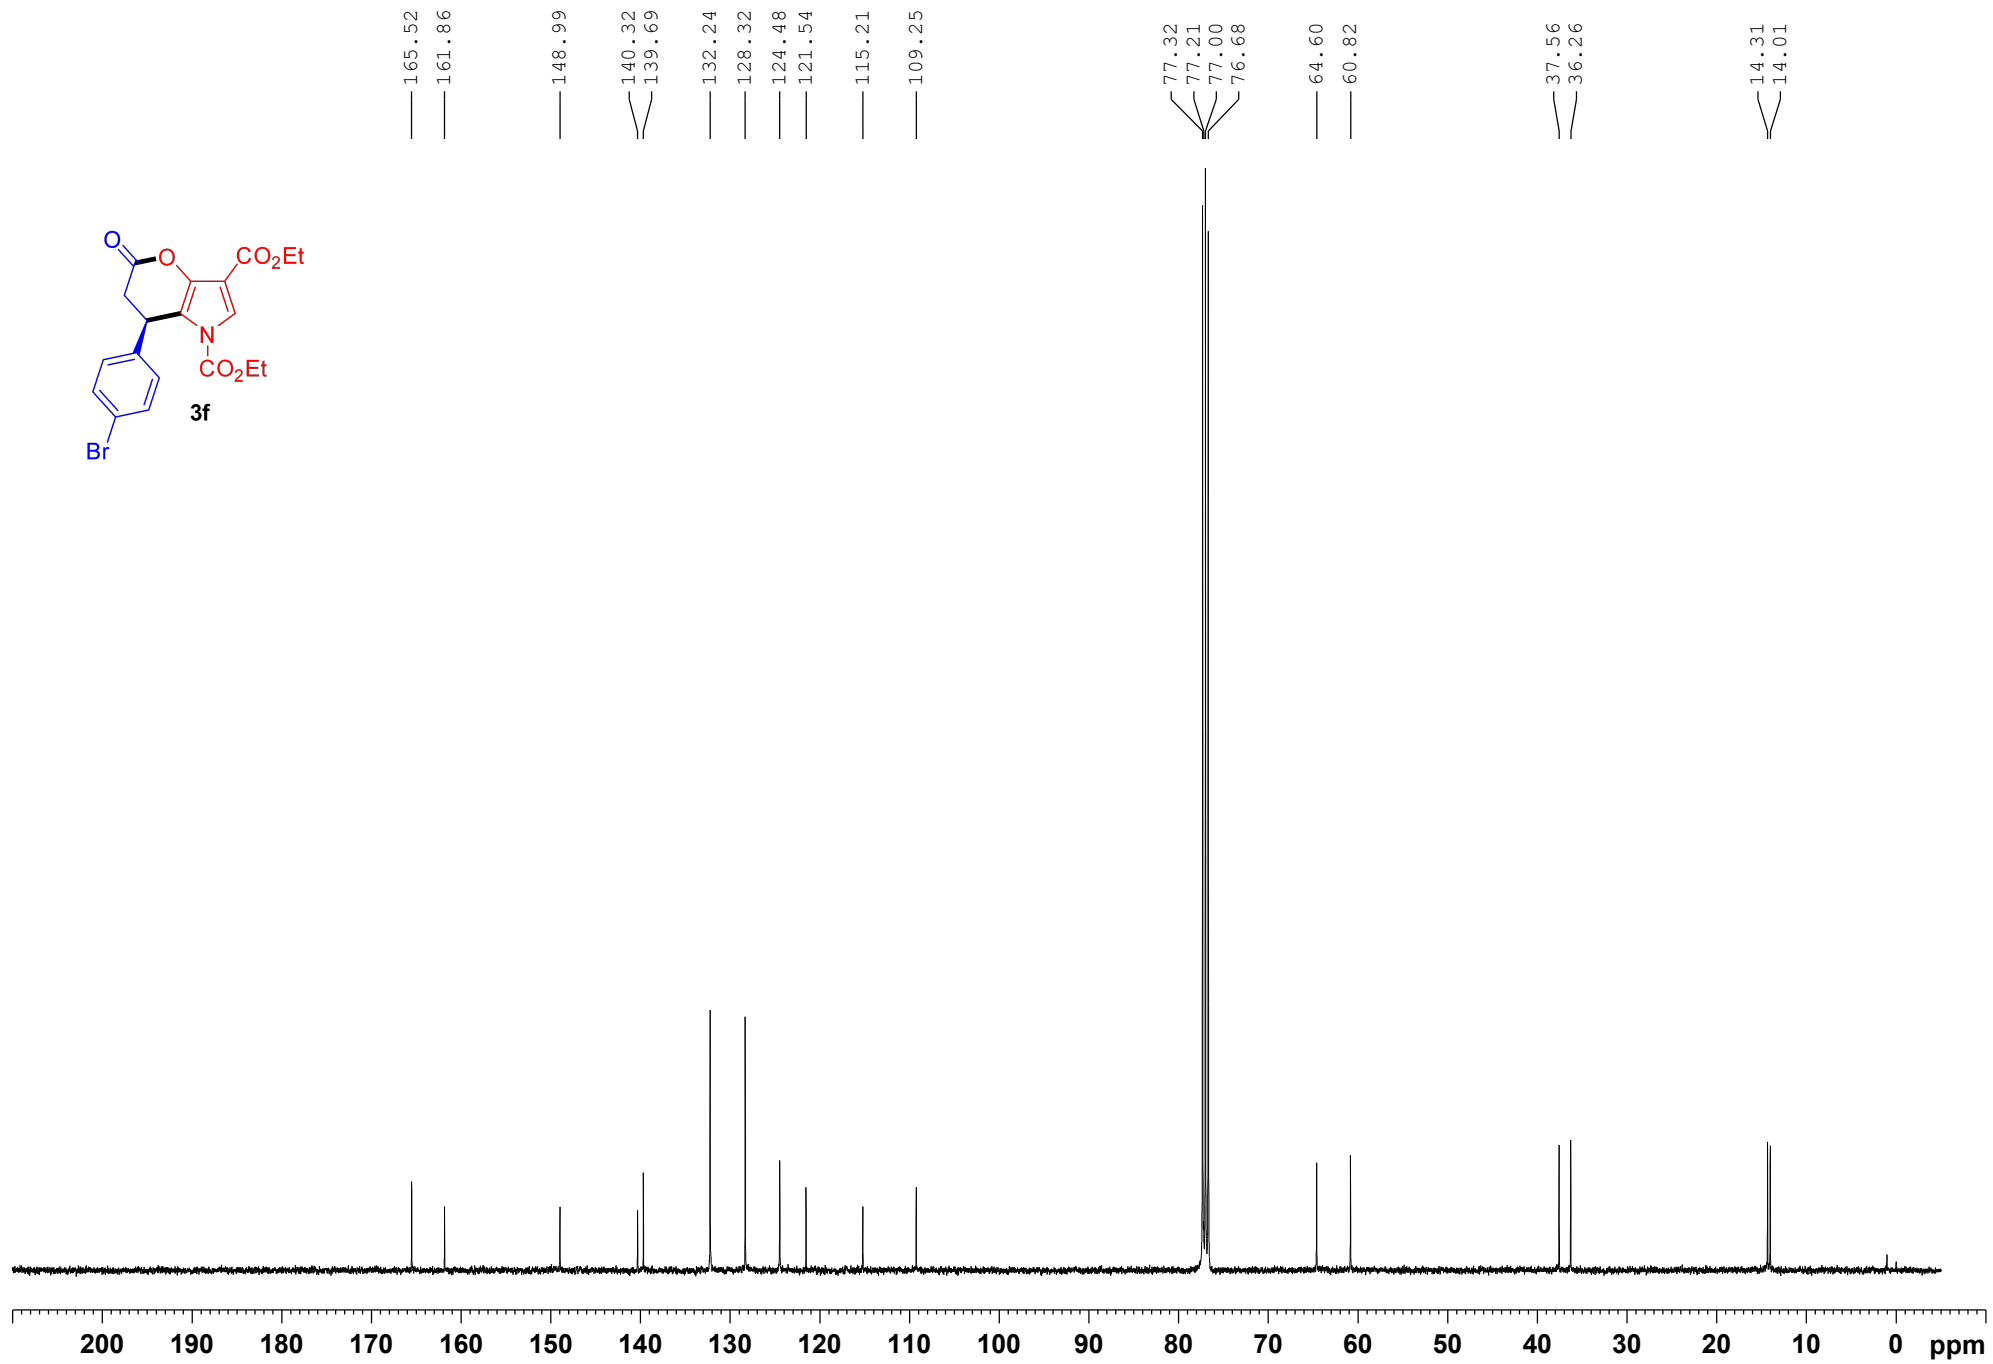

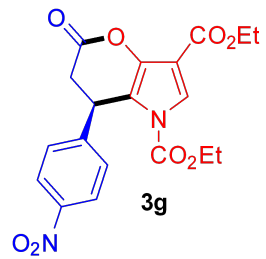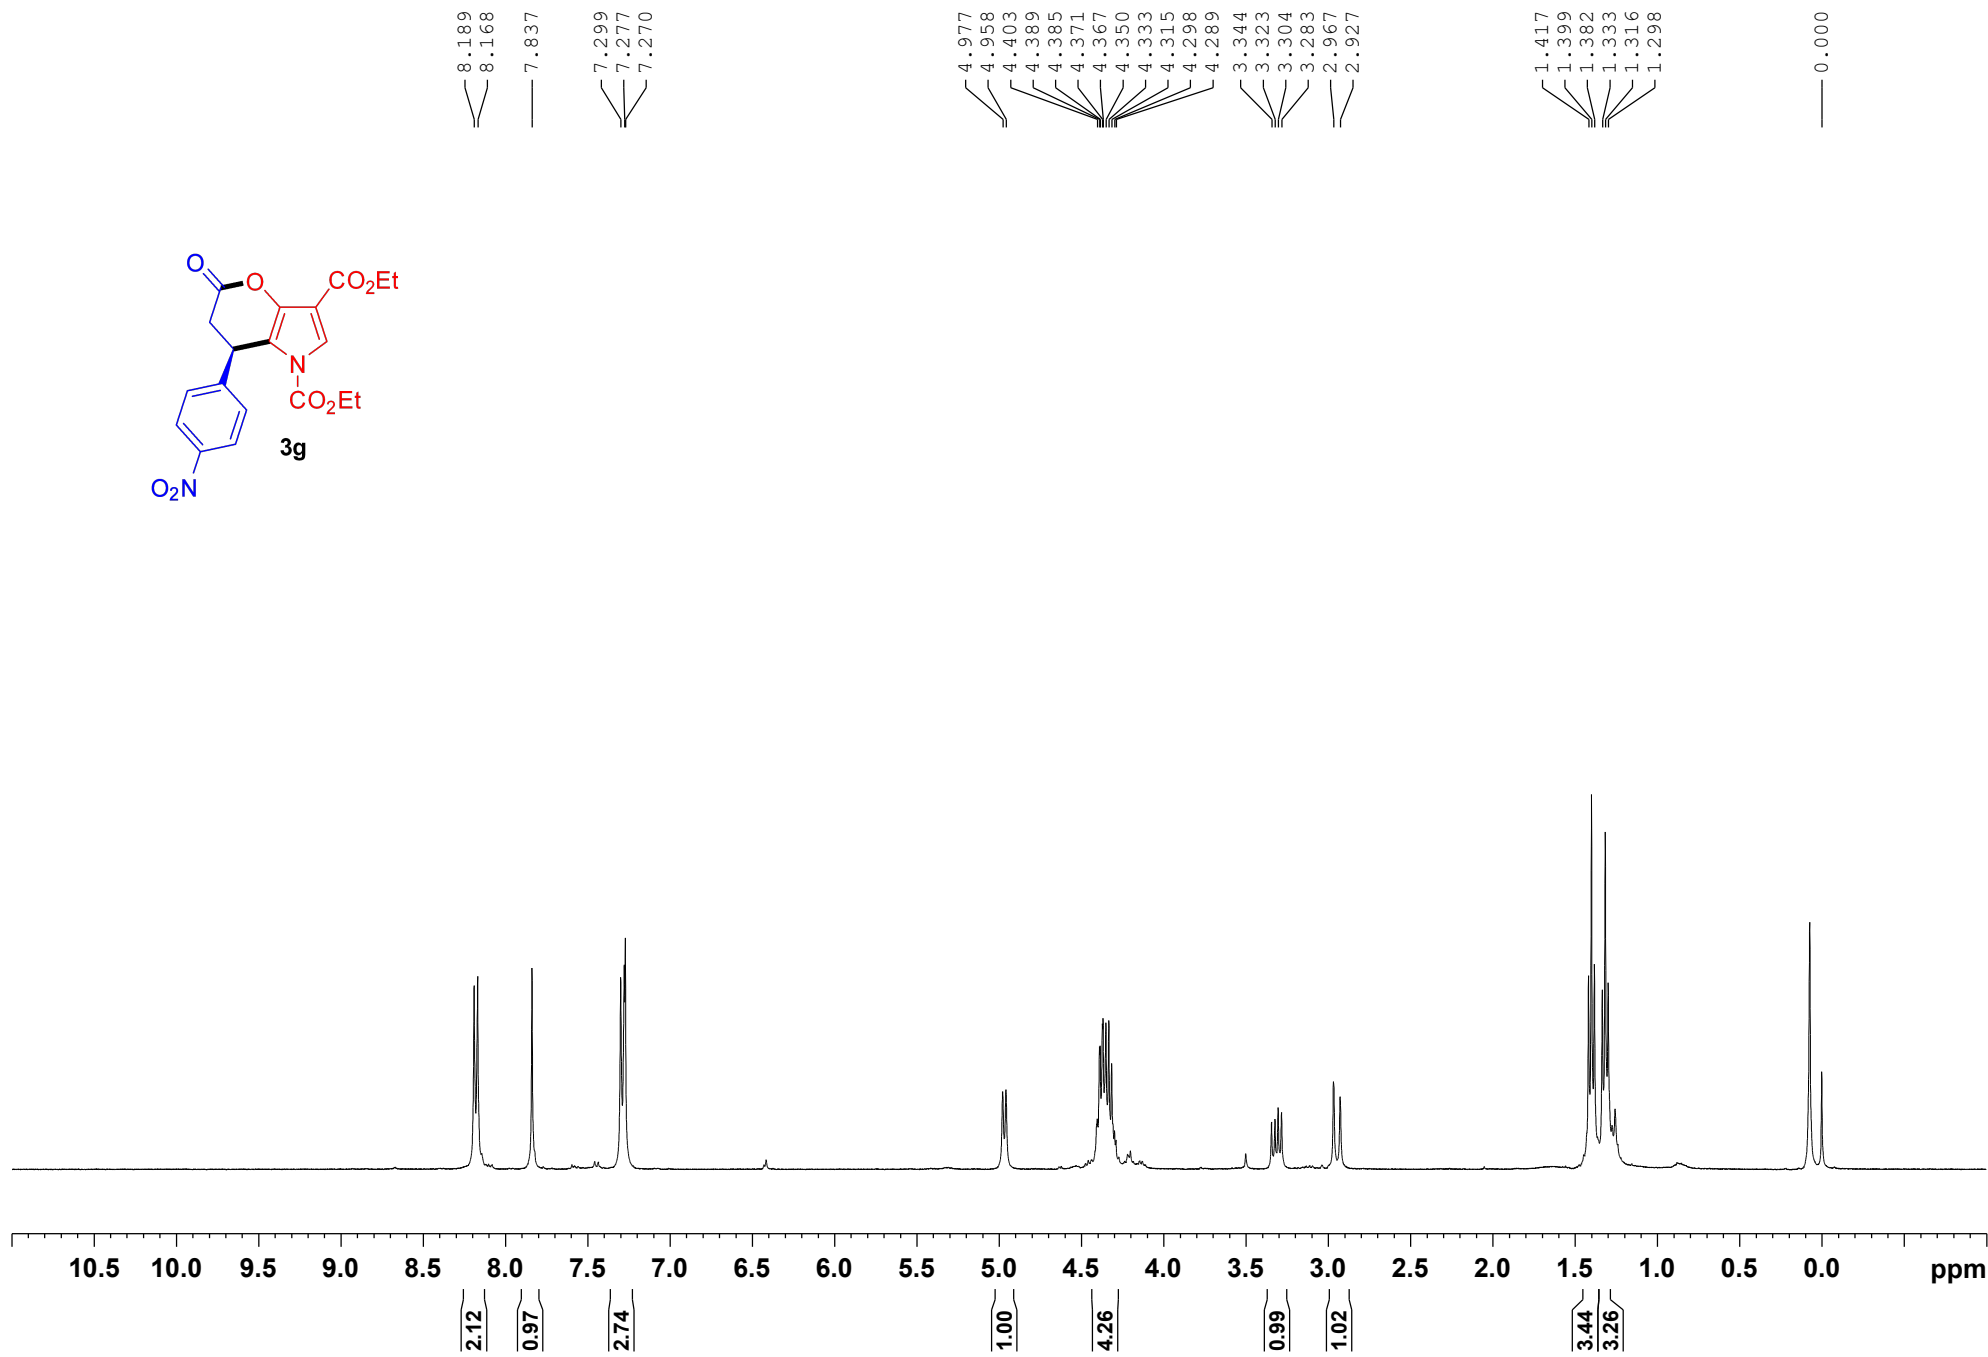

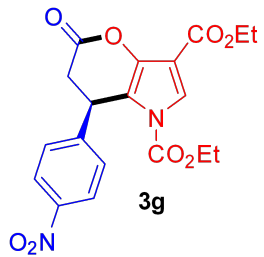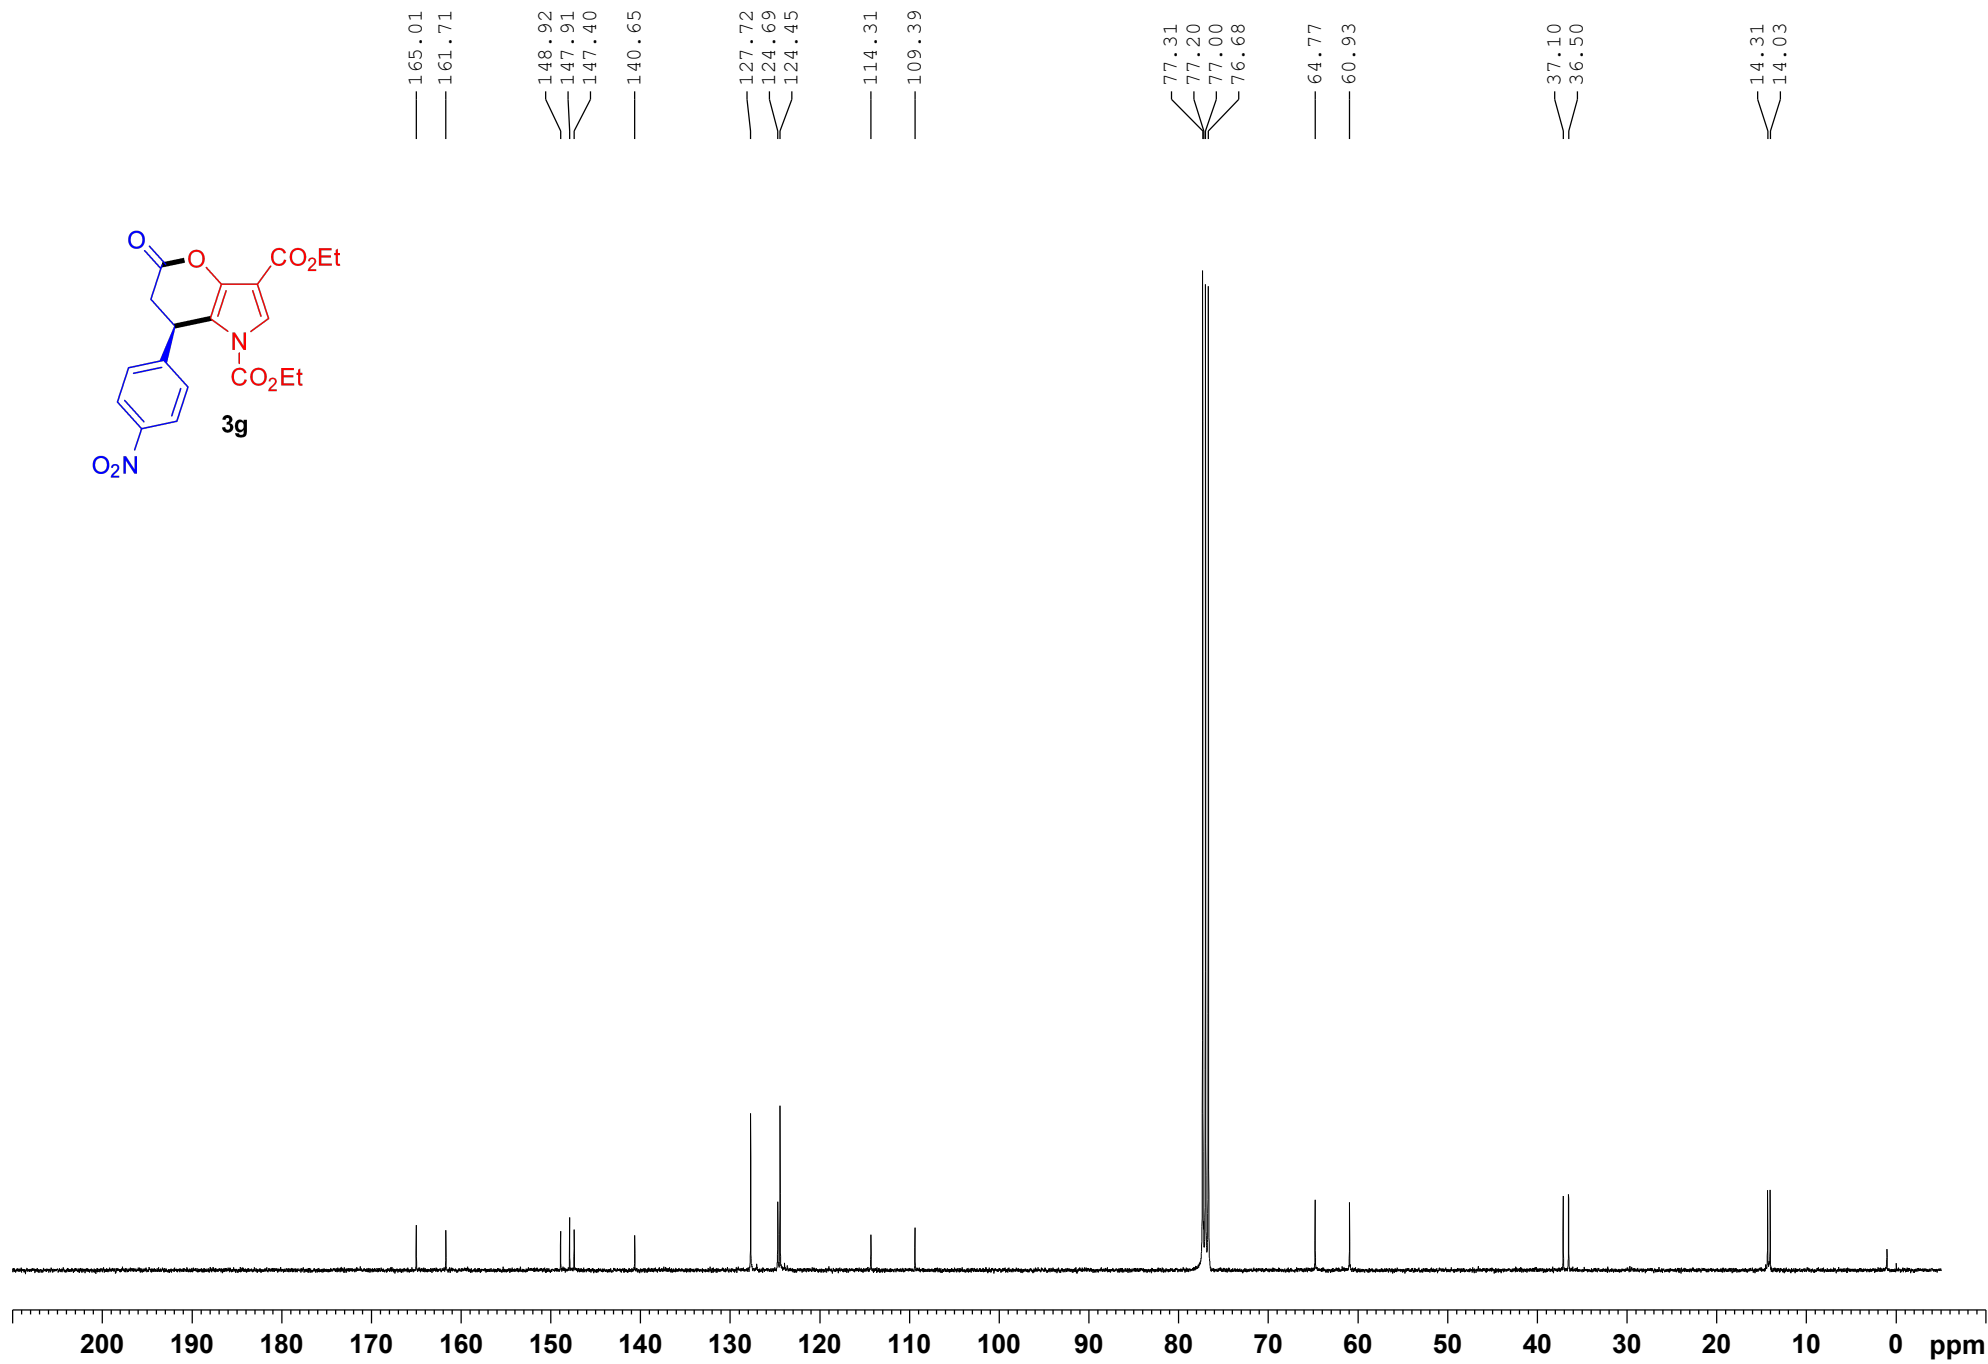



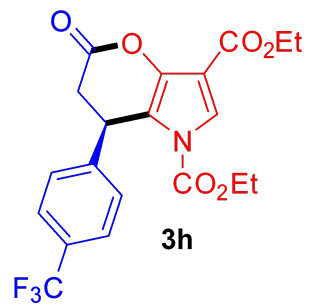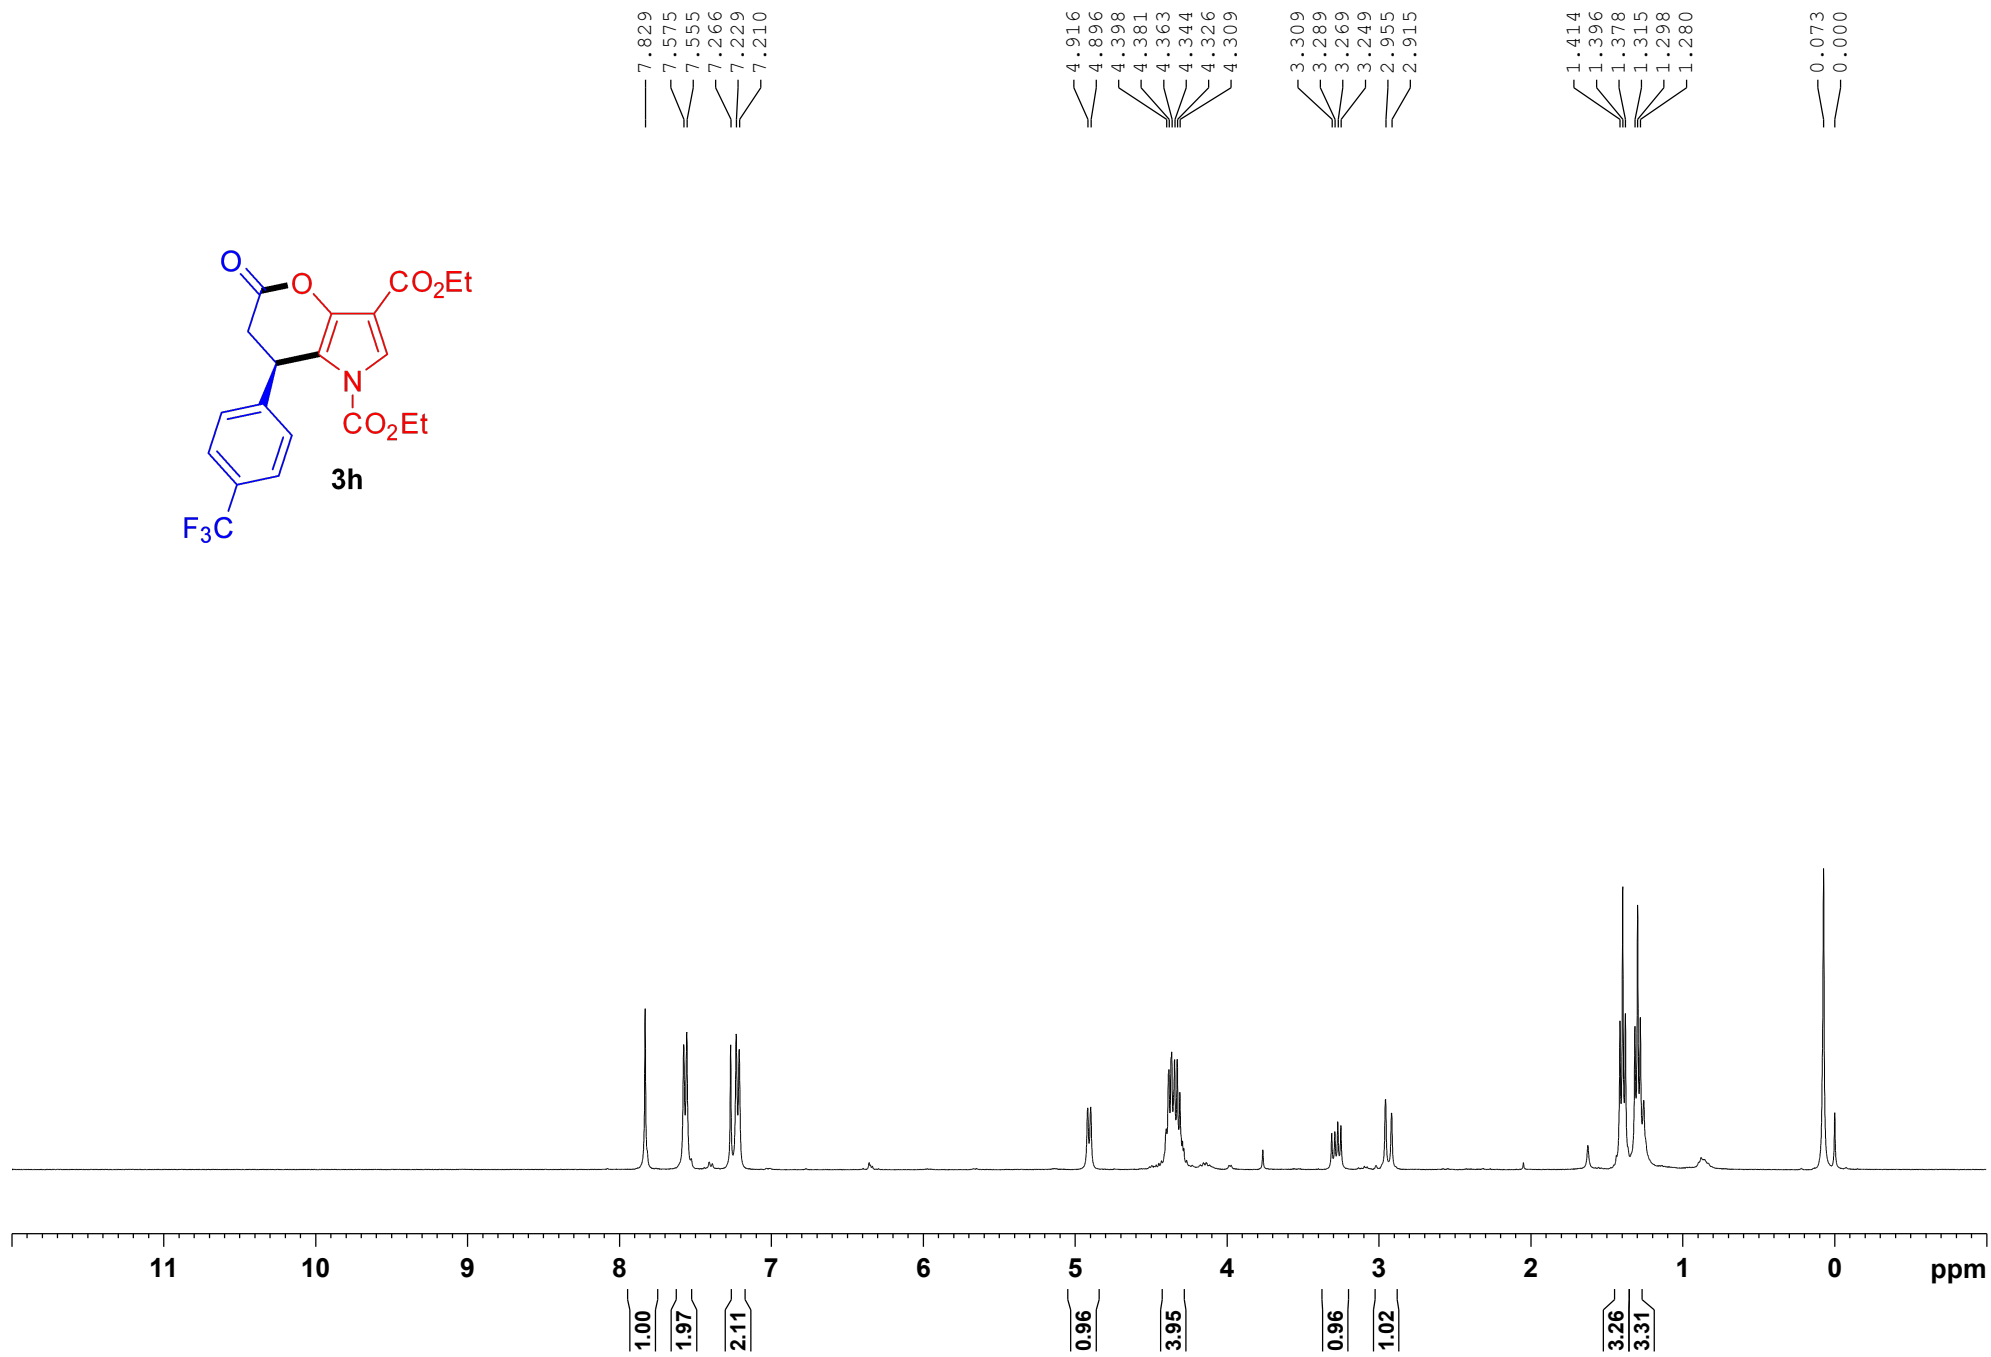

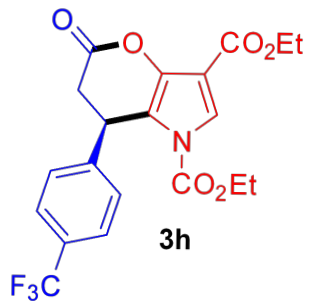

— 165.42  
 — 161.81  
 — 148.99  
 — 144.64  
 — 140.46  
 — 130.42  
 — 130.12  
 — 129.77  
 — 129.42  
 — 127.90  
 — 127.12  
 — 126.18  
 — 125.22  
 — 124.56  
 — 122.52  
 — 119.86  
 — 114.90  
 — 109.29

77.32  
 77.01  
 76.69

— 64.68  
 — 60.89

37.43  
 36.54

14.32  
 14.01

1.00  
 -0.01

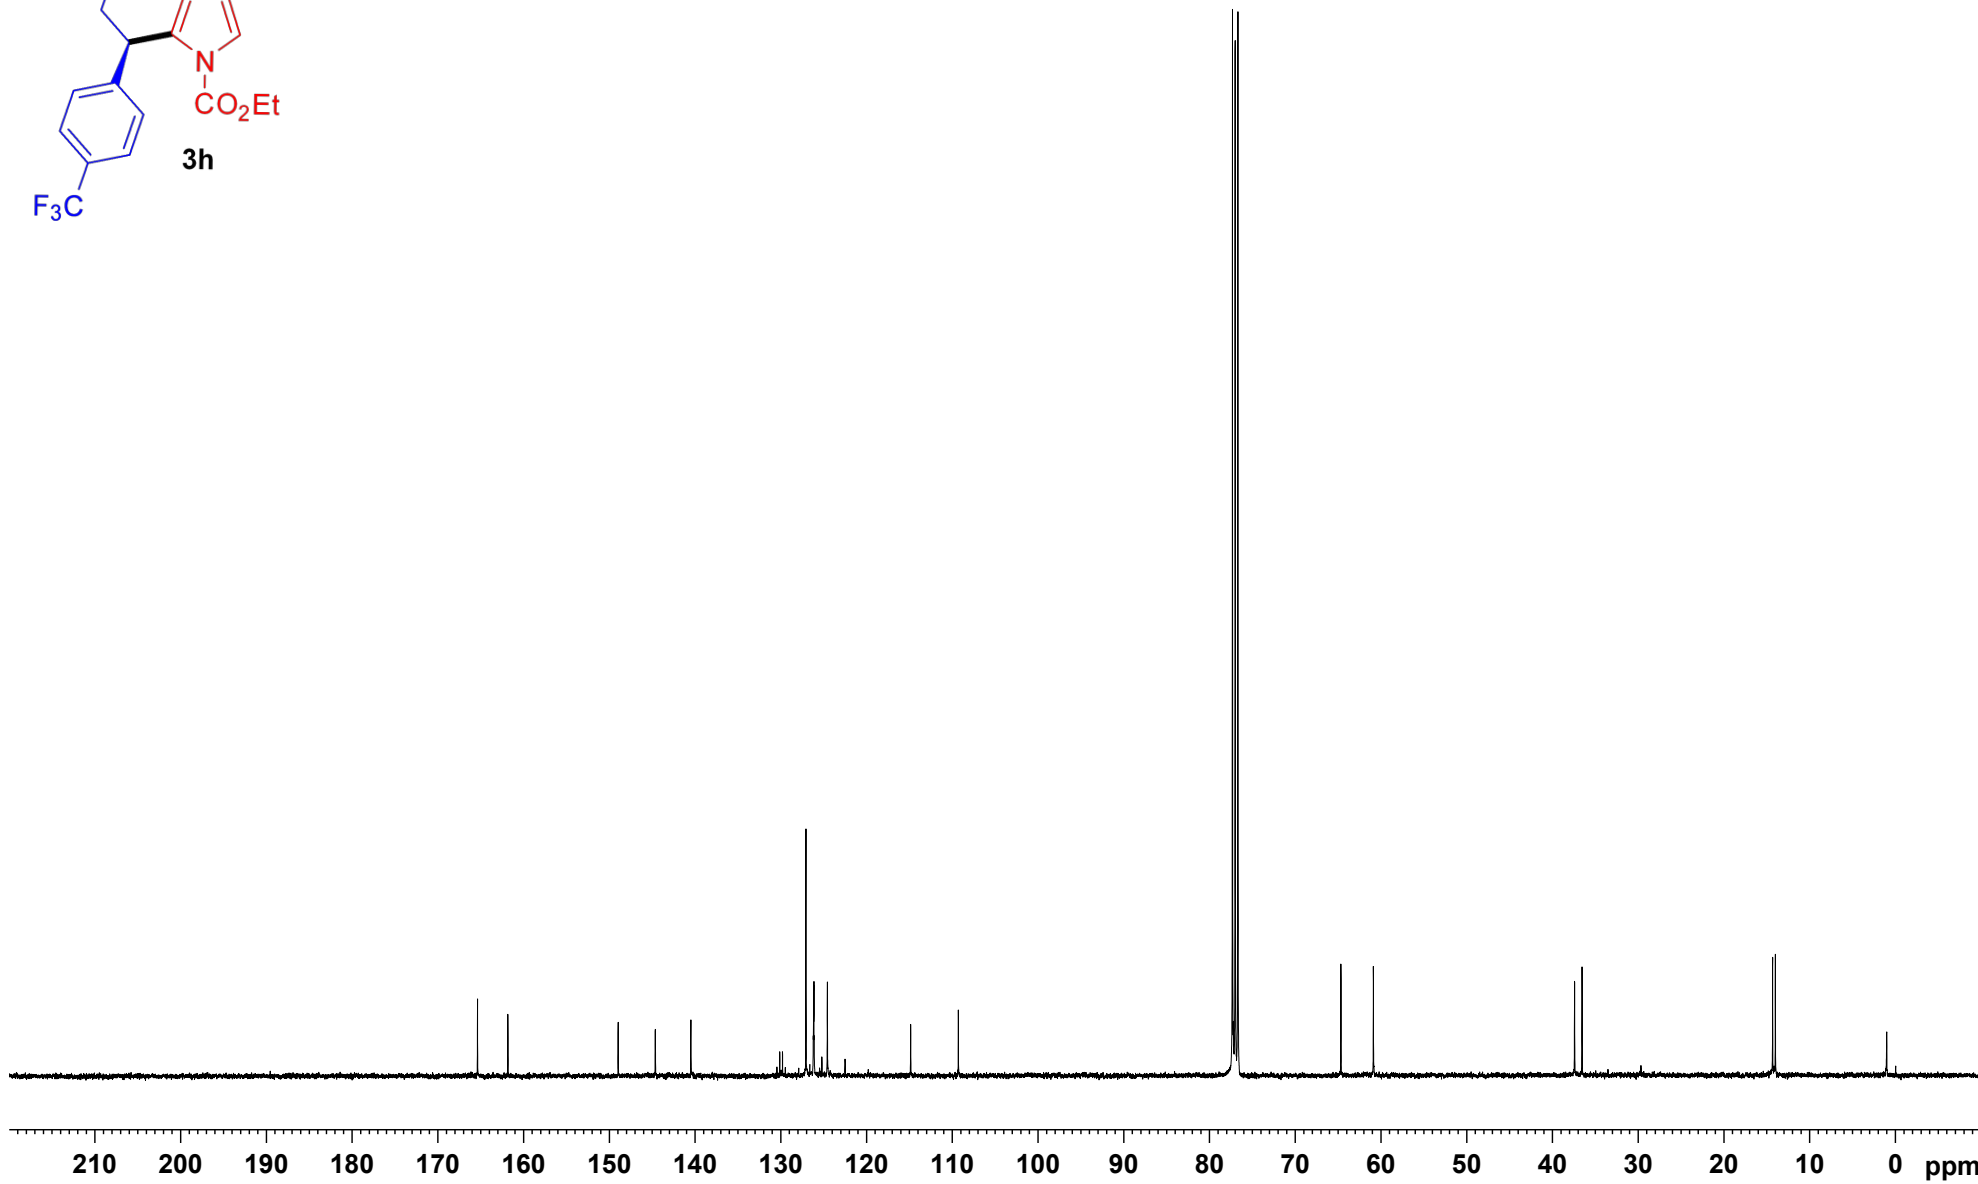

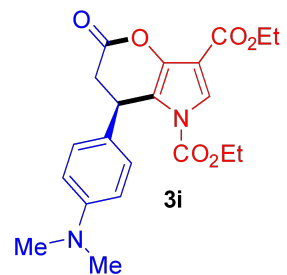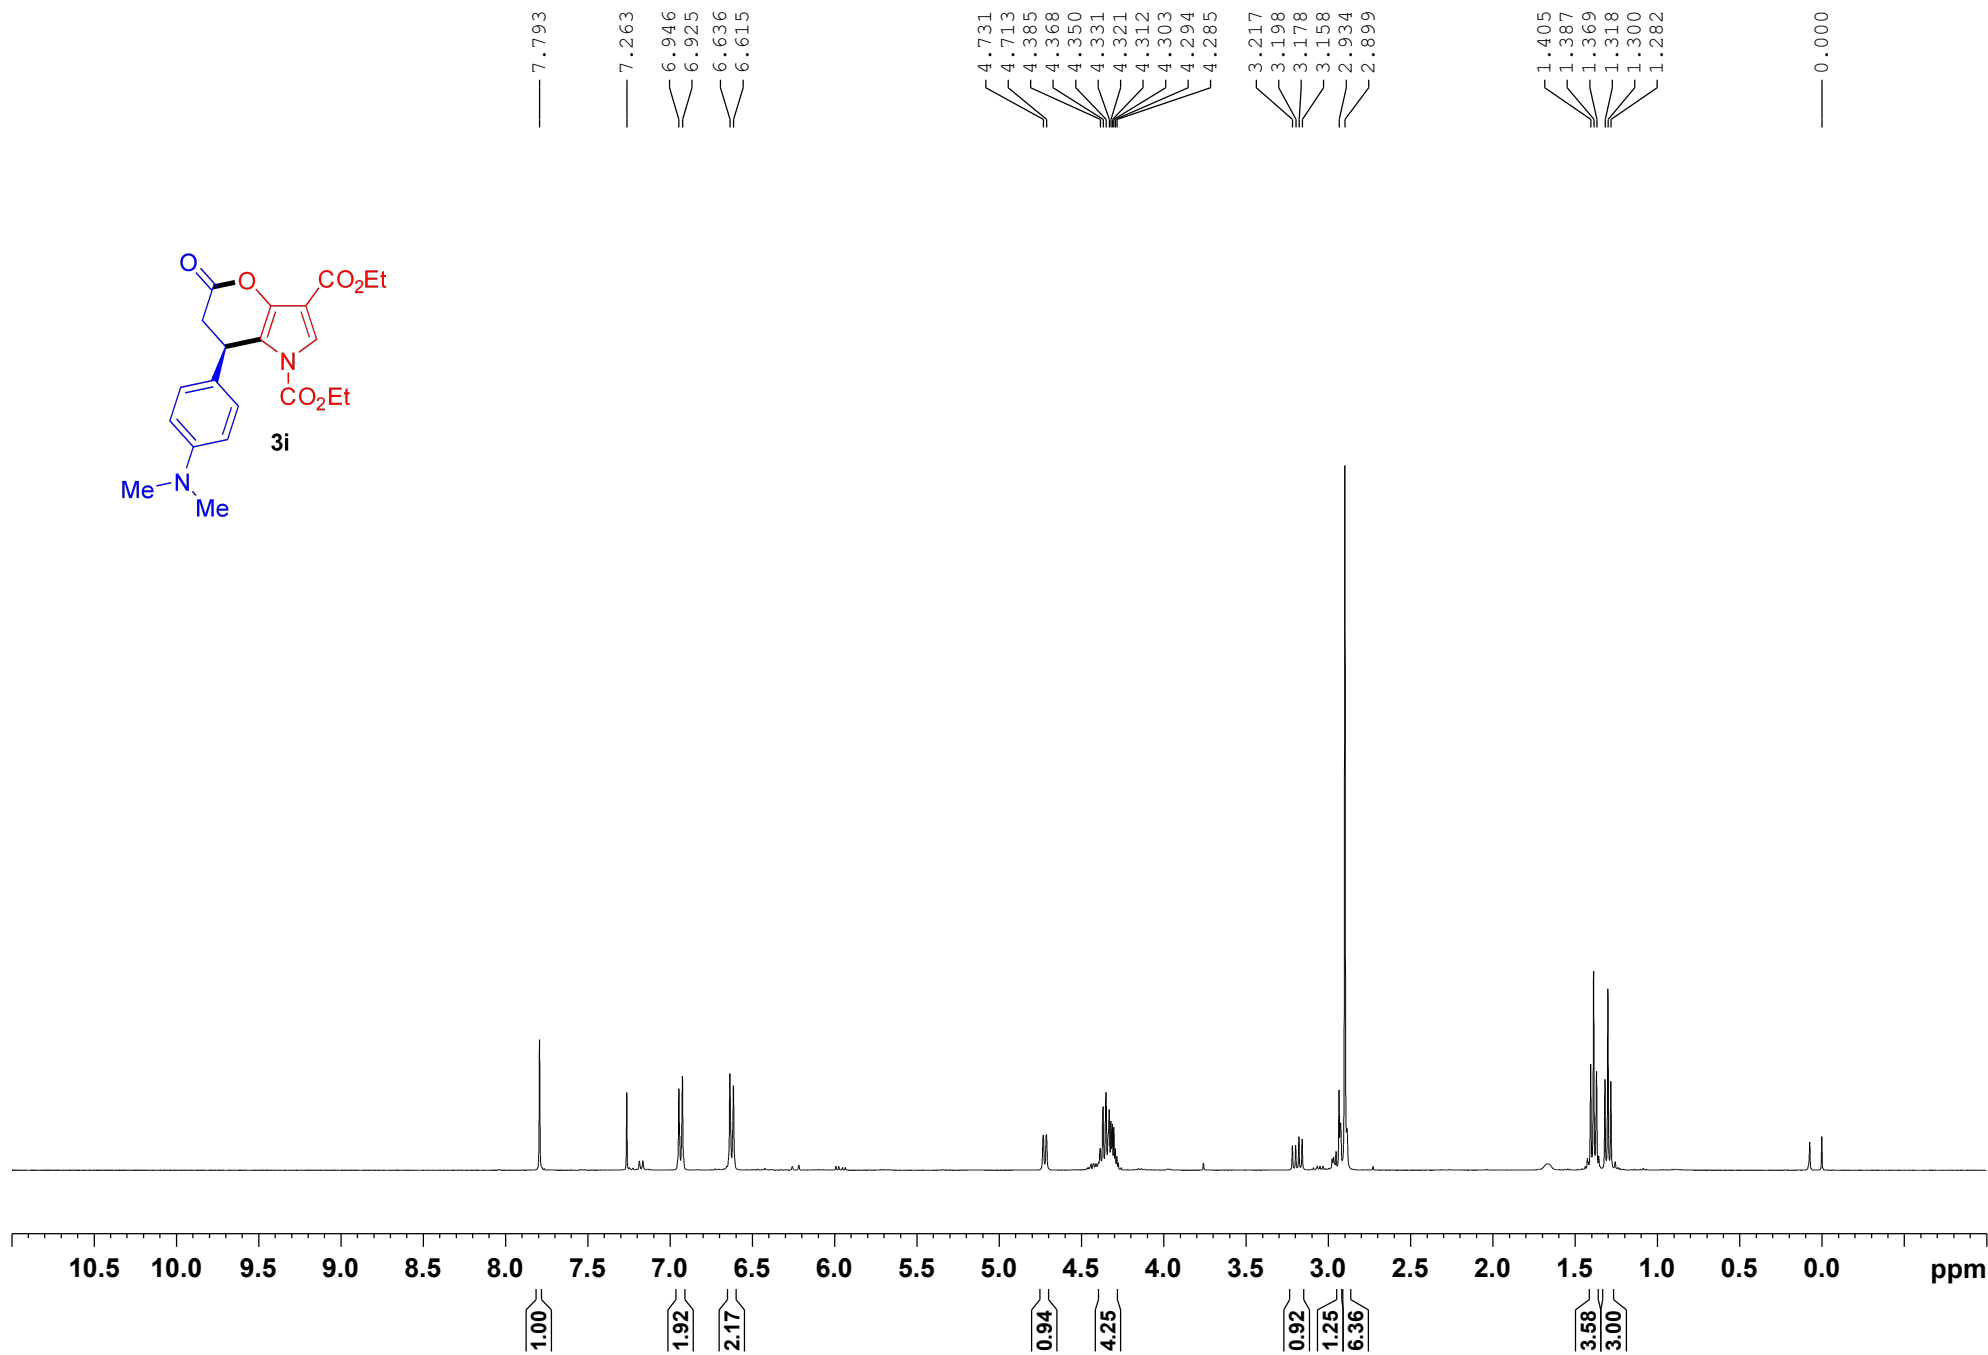

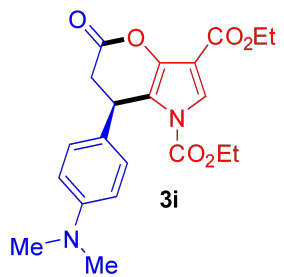

— 166.32  
— 162.10

∨ 149.86  
149.15

— 139.80

— 127.22  
— 124.14

— 116.77  
— 112.87  
— 109.11

∨ 77.32  
77.00  
76.68

— 64.37  
— 60.68

— 40.48  
— 38.18  
— 35.95

∨ 14.31  
14.01

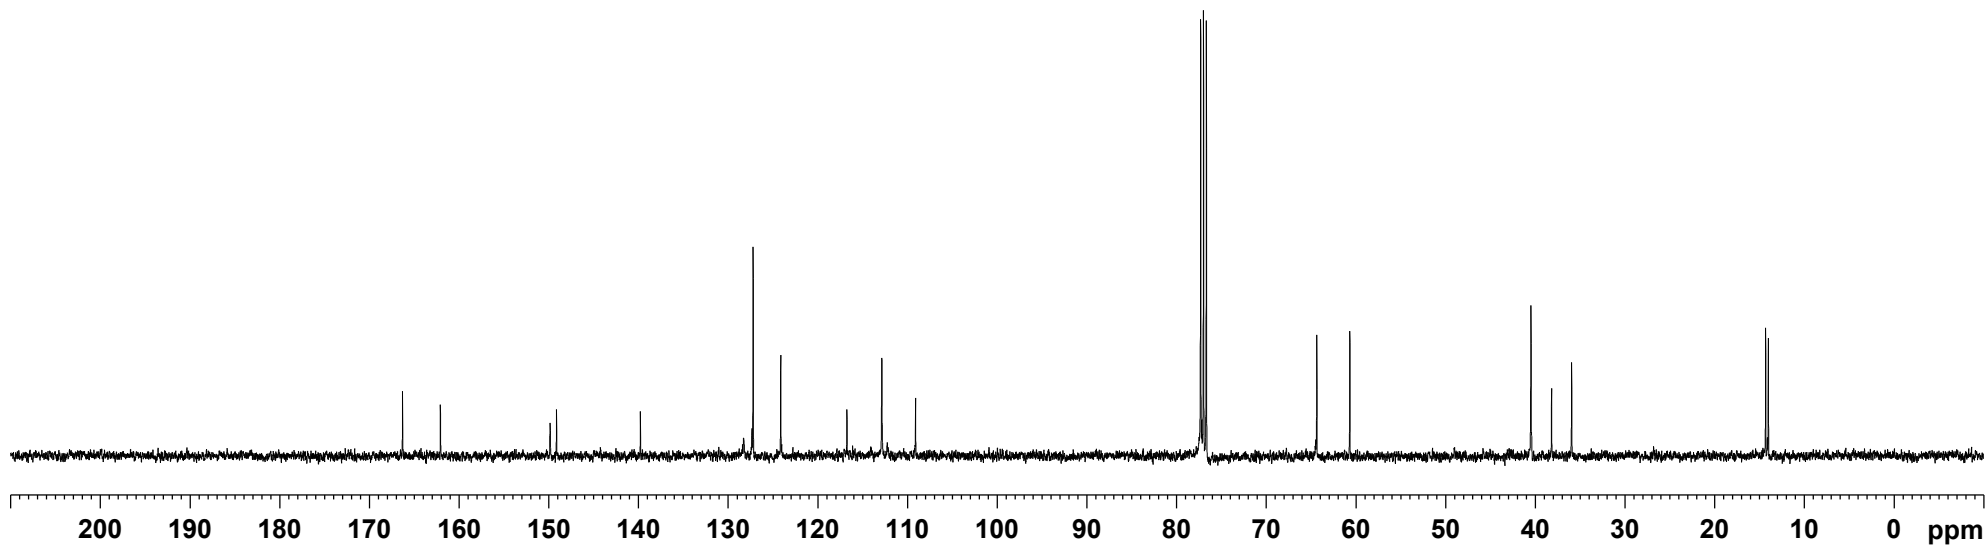

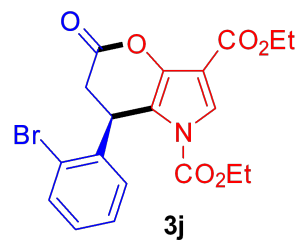

7.902  
7.621  
7.602  
7.268  
7.203  
7.185  
7.167  
7.142  
7.125  
7.107  
6.758  
6.740

5.238  
5.218  
5.218  
4.397  
4.386  
4.380  
4.369  
4.363  
4.351  
4.330  
4.321  
4.303  
4.290  
4.286  
4.273  
4.256  
3.237  
3.216  
3.197  
3.176  
3.059  
3.019

1.414  
1.396  
1.378  
1.202  
1.184  
1.166

0.073  
-0.000

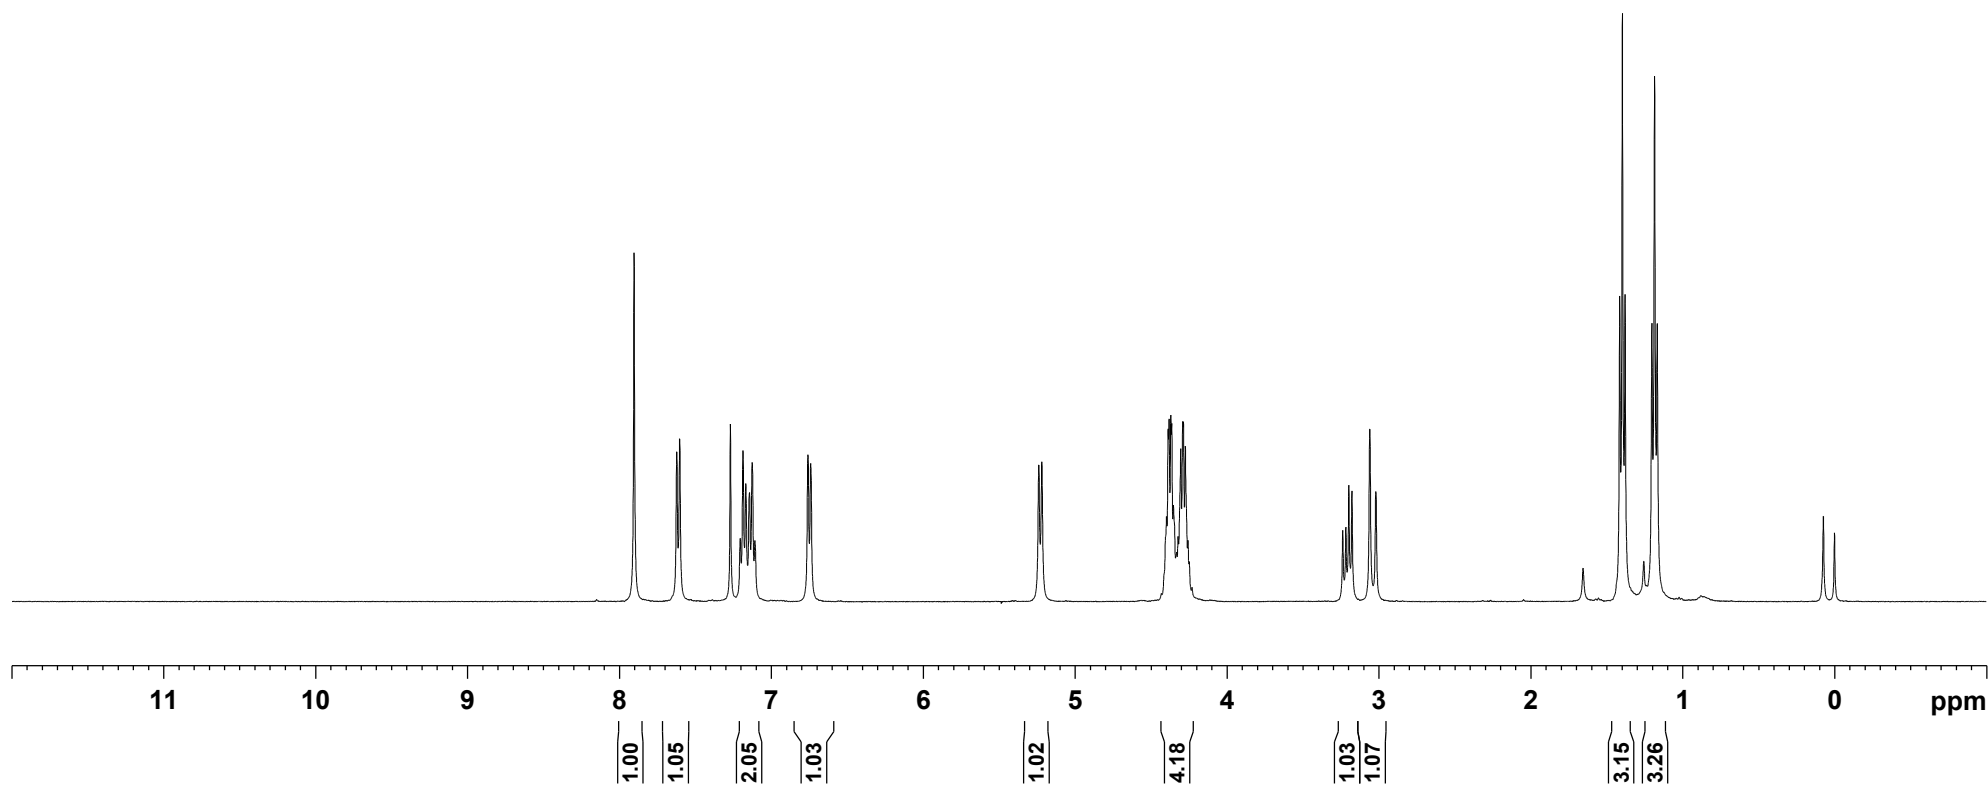

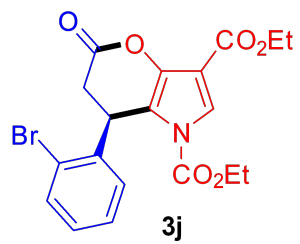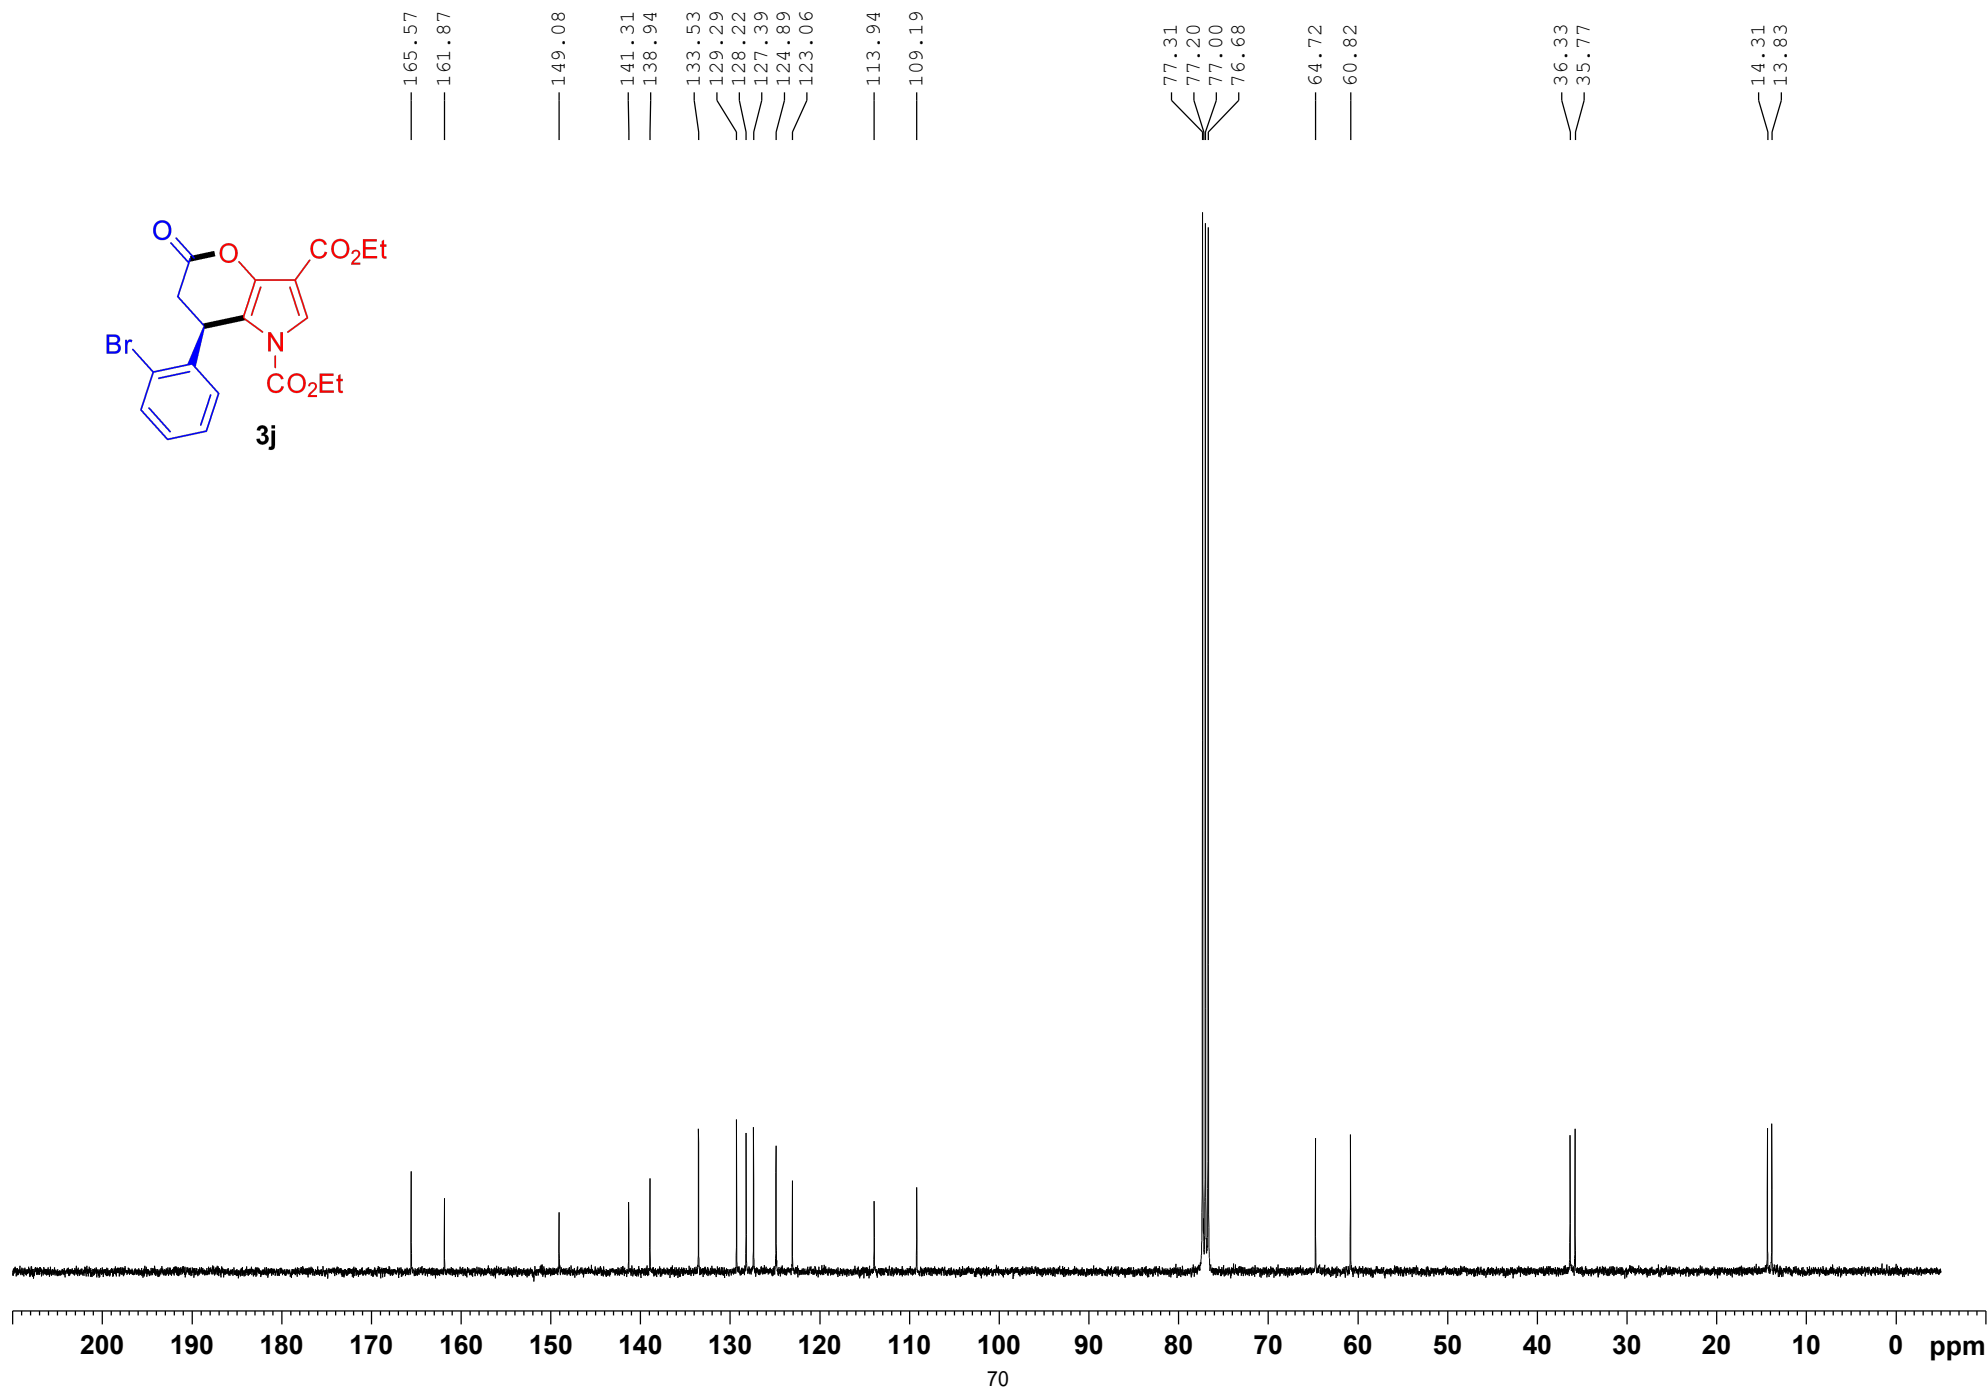

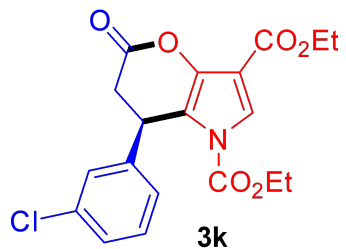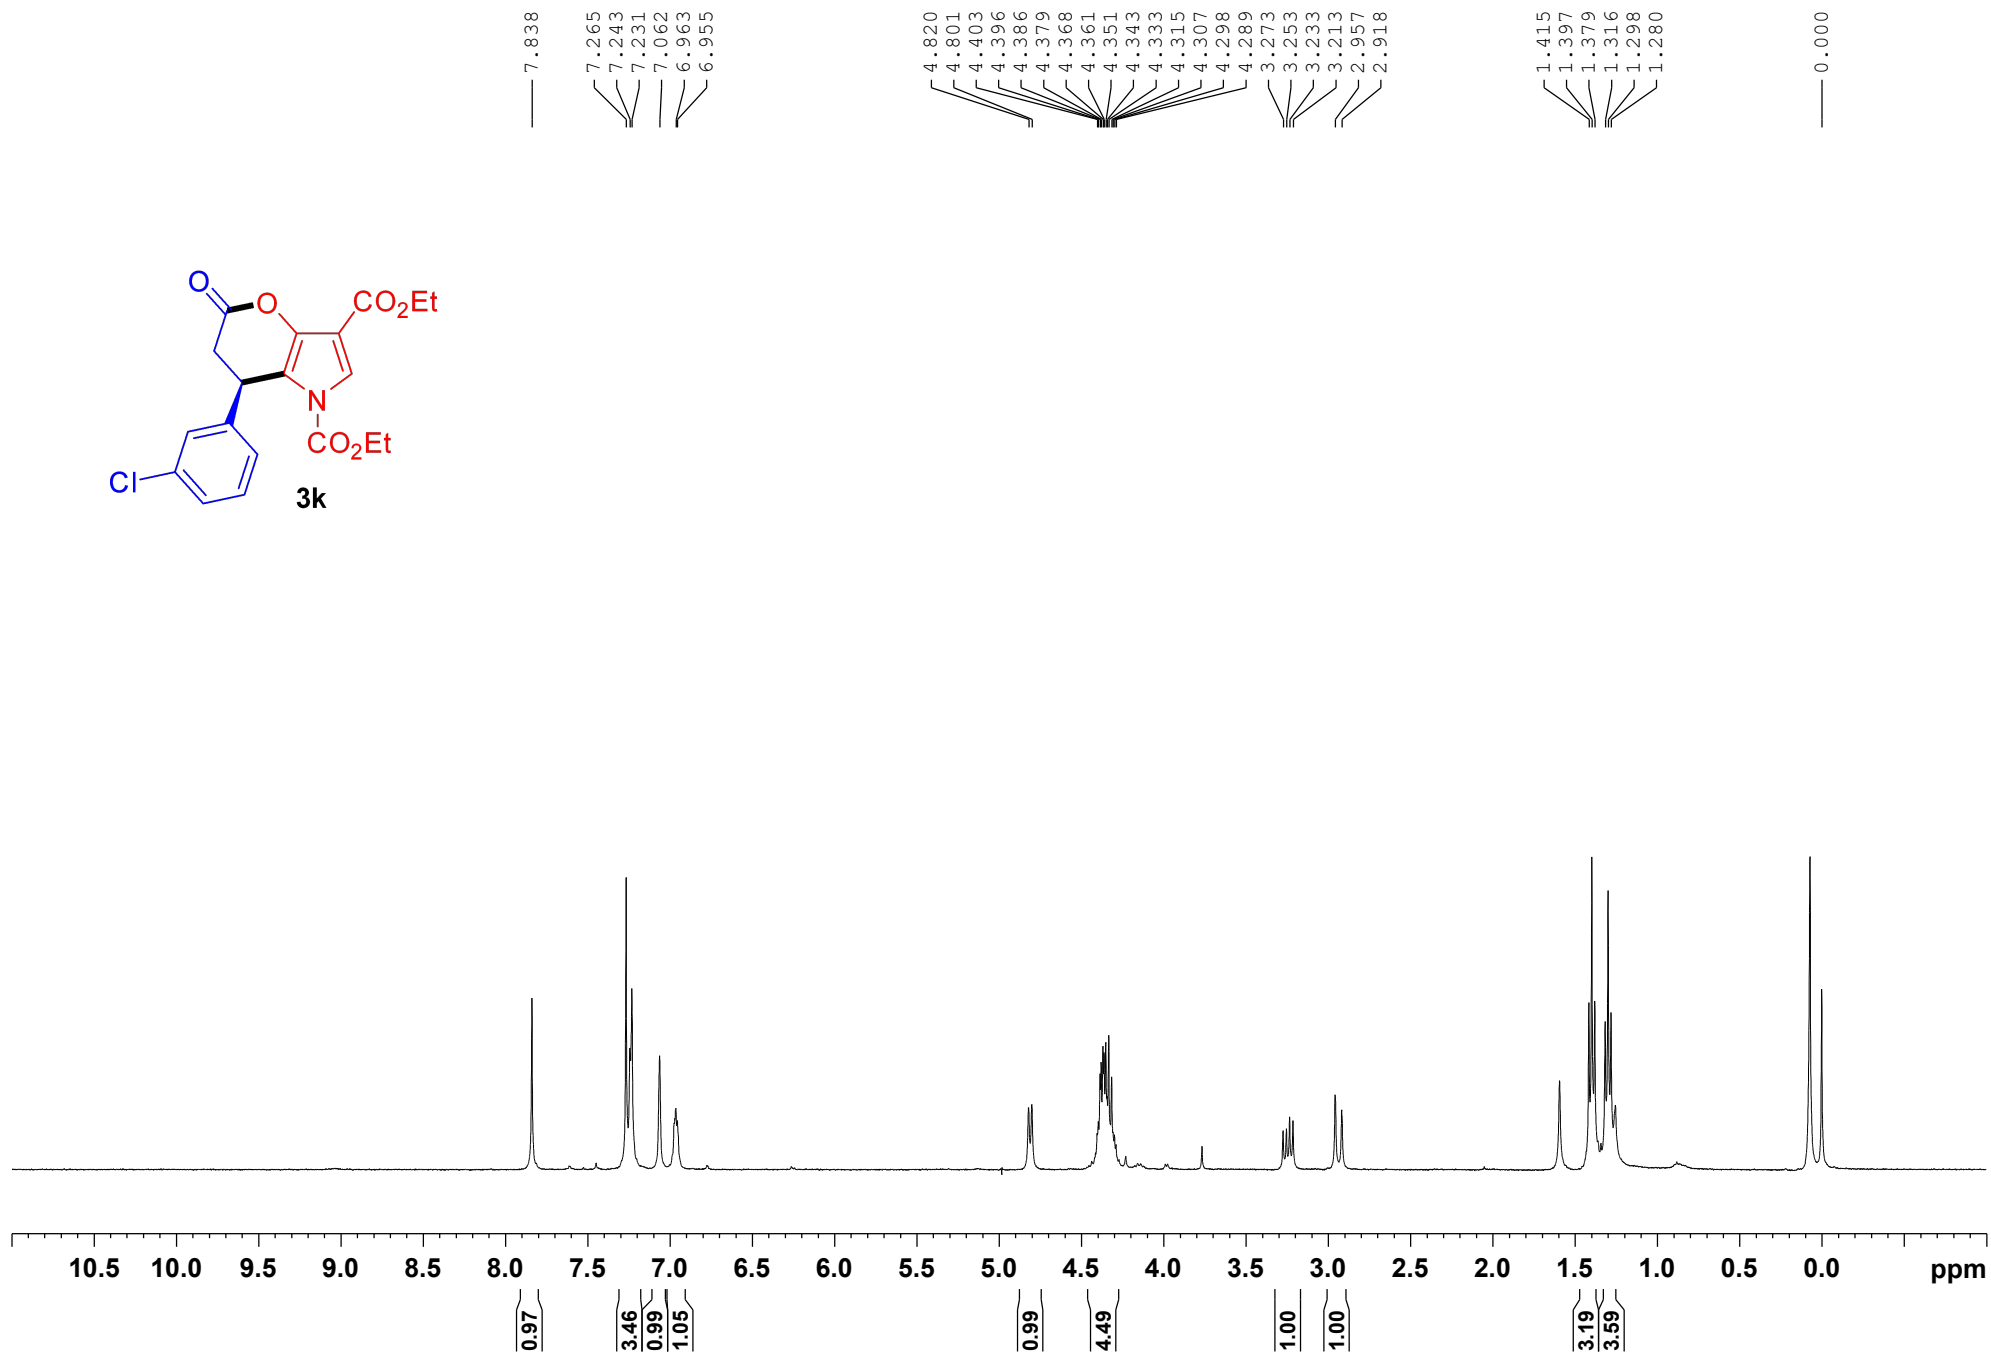

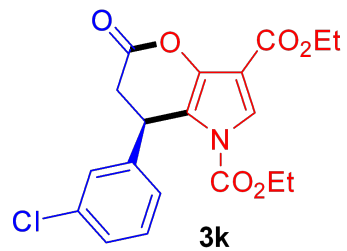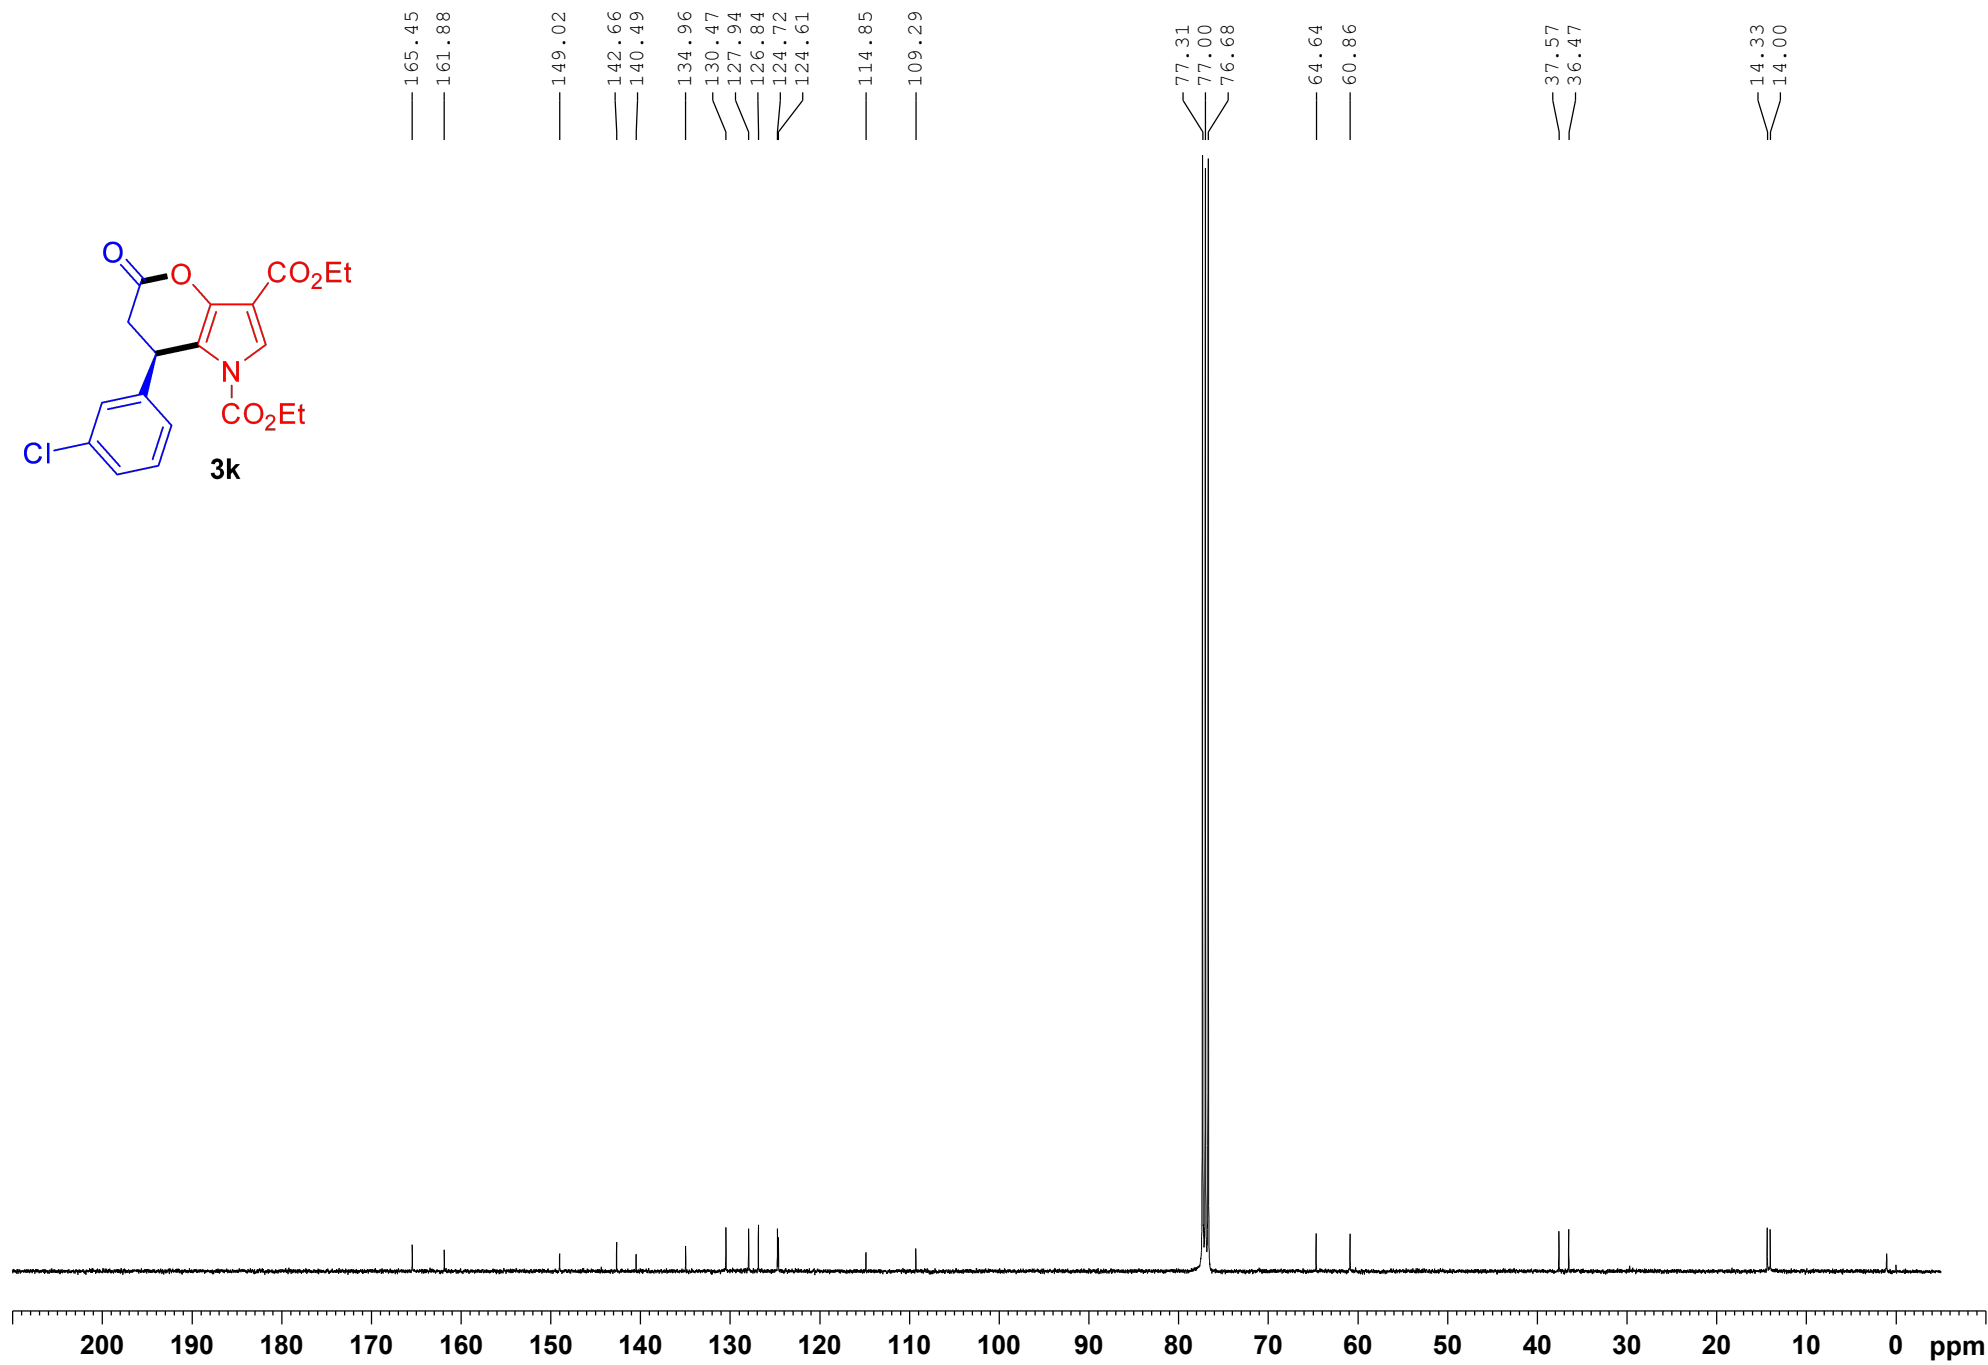



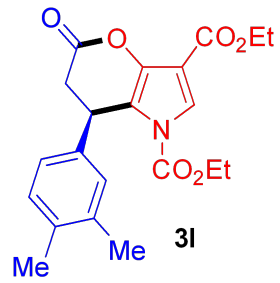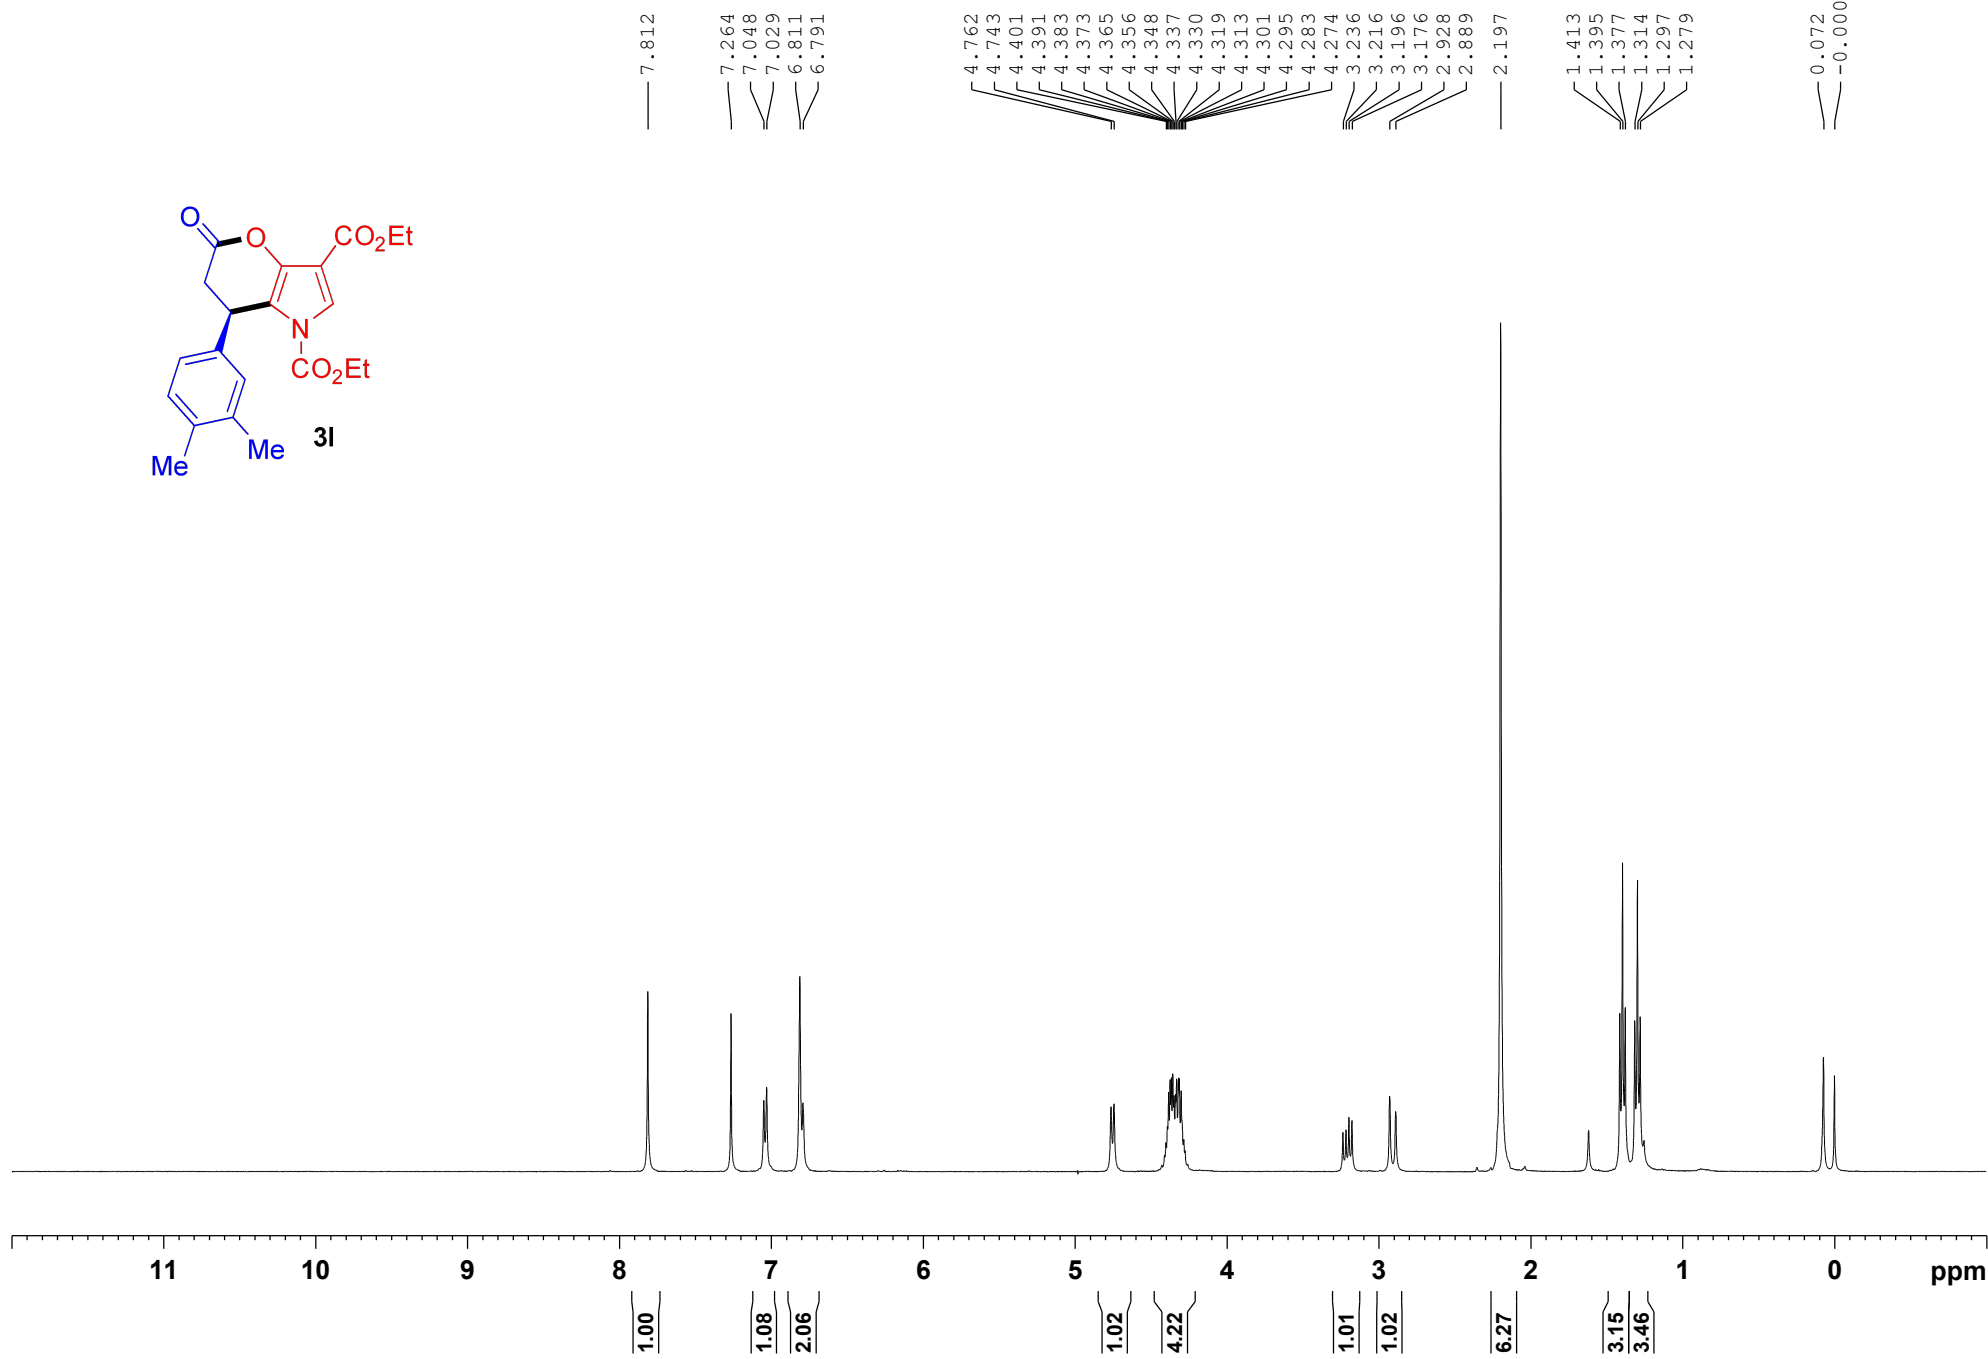

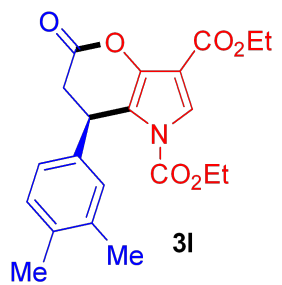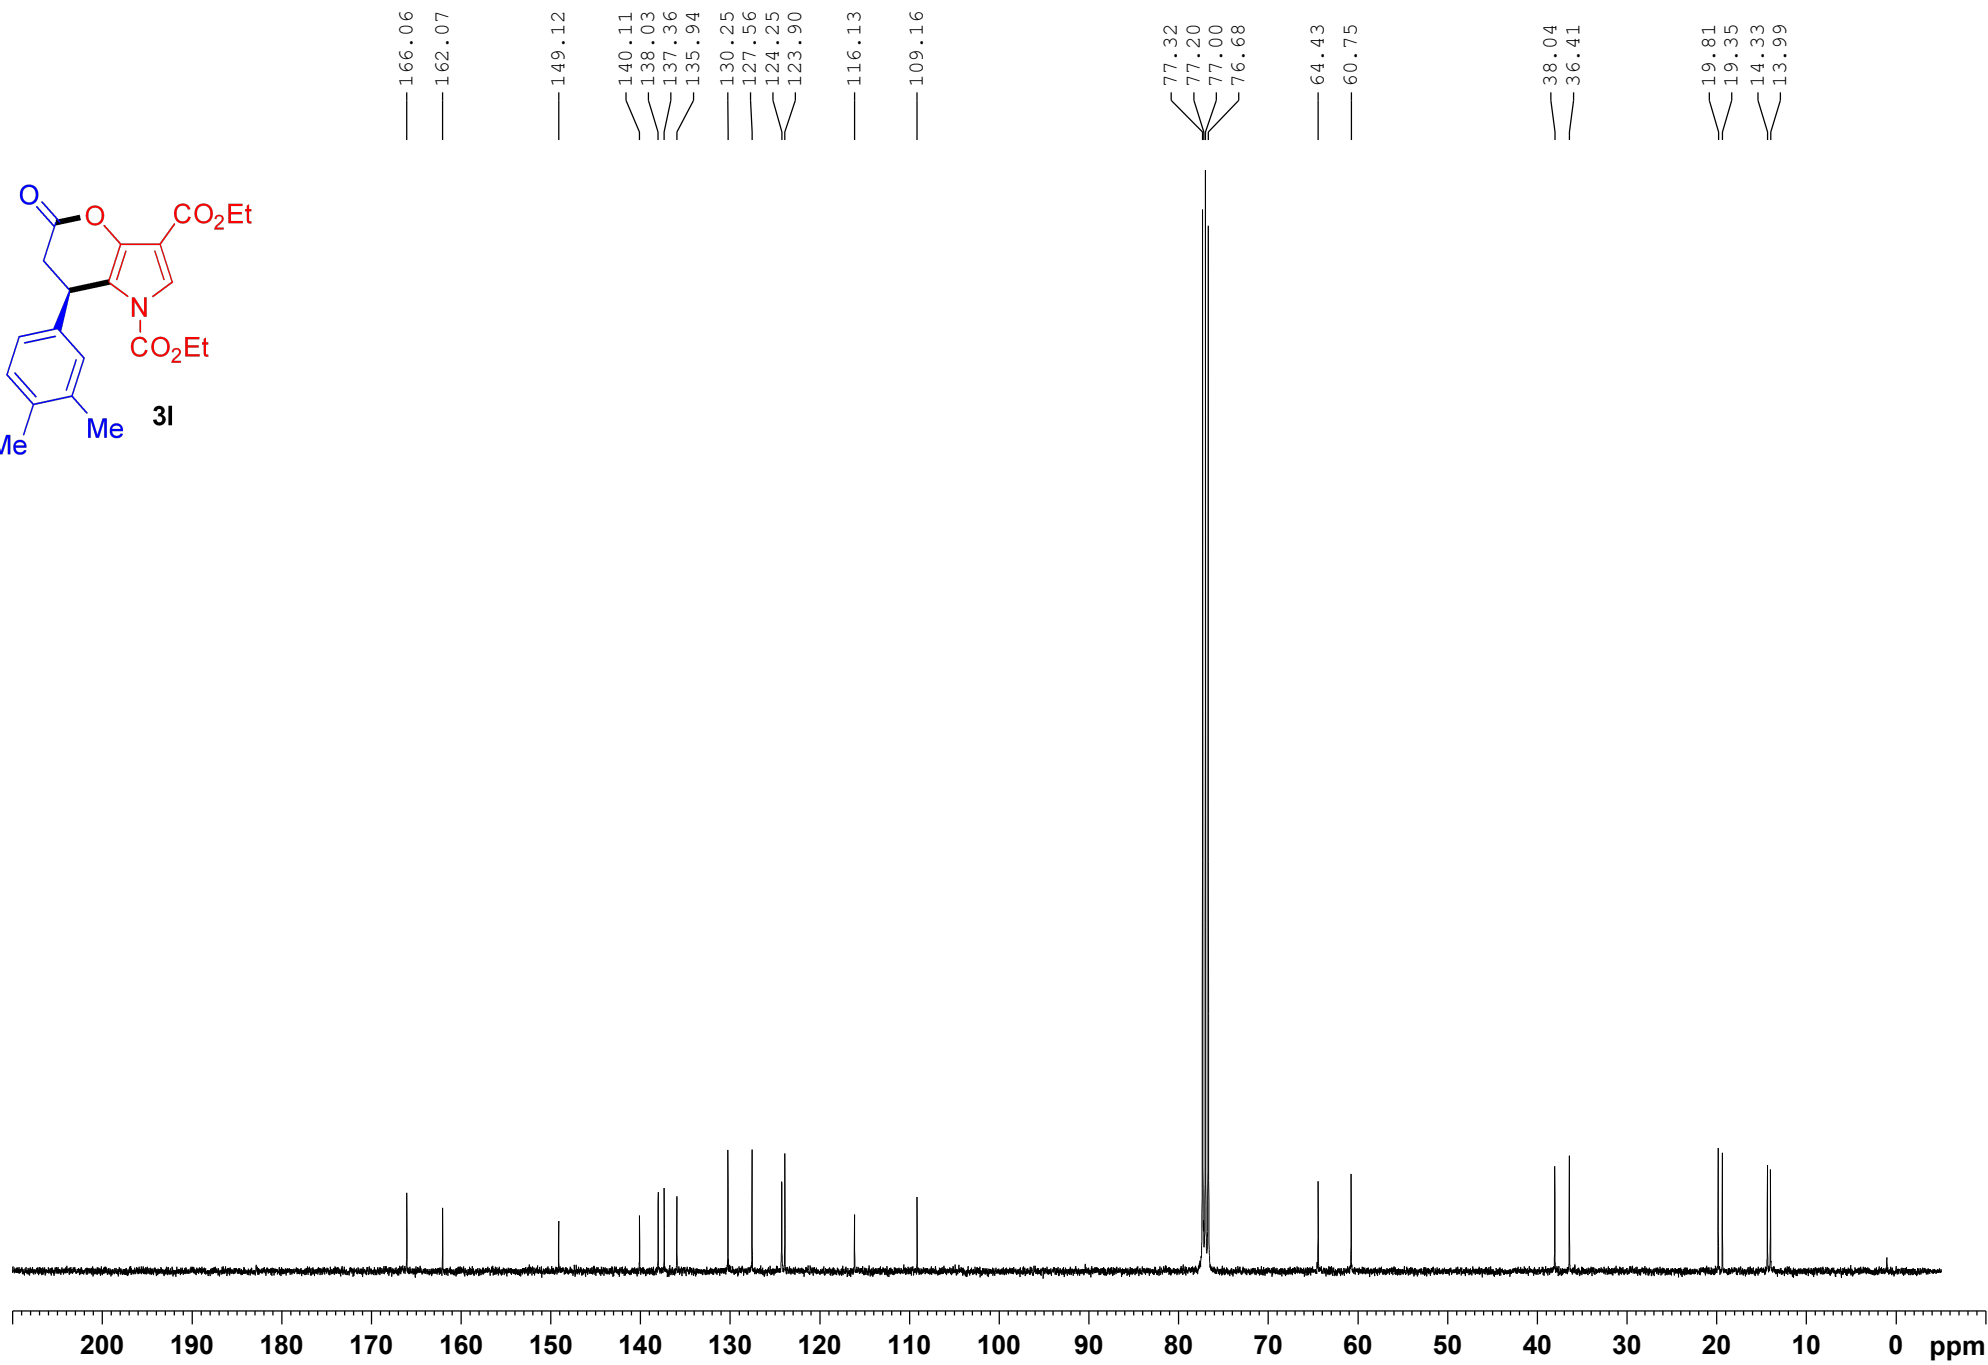

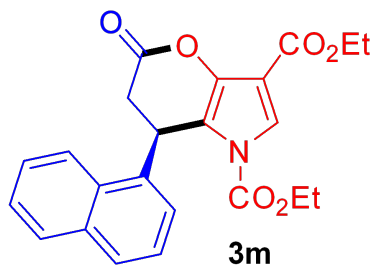

8.048  
8.027  
7.930  
7.914  
7.893  
7.761  
7.740  
7.624  
7.607  
7.587  
7.554  
7.535  
7.518  
7.319  
7.300  
7.281  
7.261  
6.865  
6.847

5.669  
5.649

4.405  
4.399  
4.388  
4.382  
4.120  
4.114  
4.103  
4.097  
3.390  
3.370  
3.351  
3.330  
3.131  
3.092

1.428  
1.410  
1.392  
0.925  
0.909  
0.892

0.000

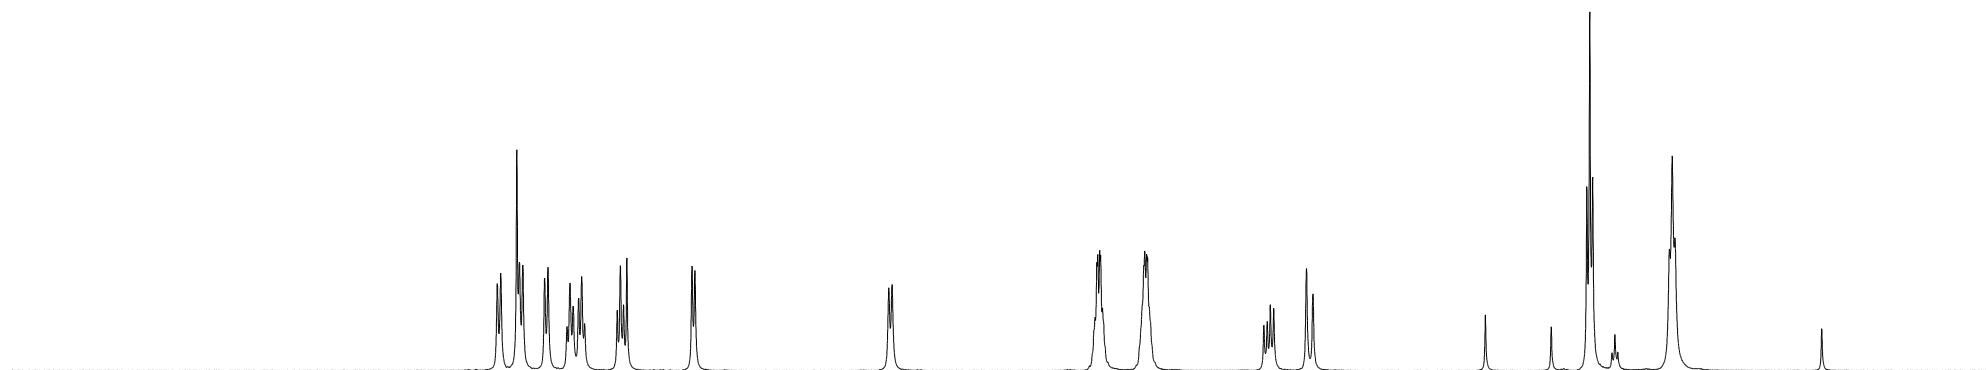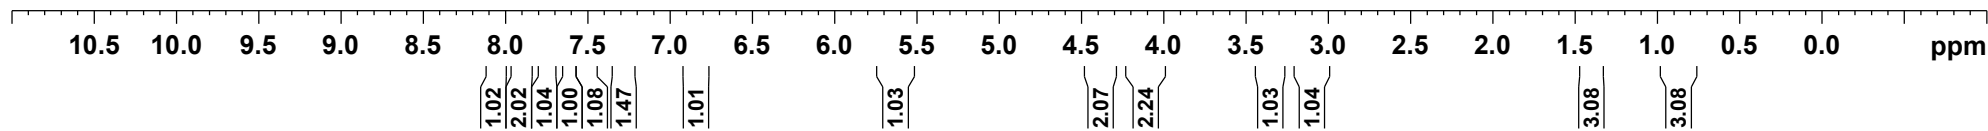

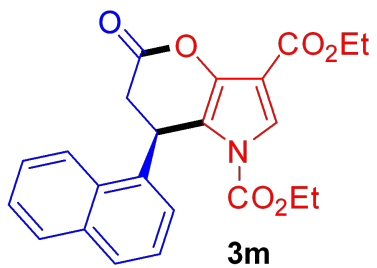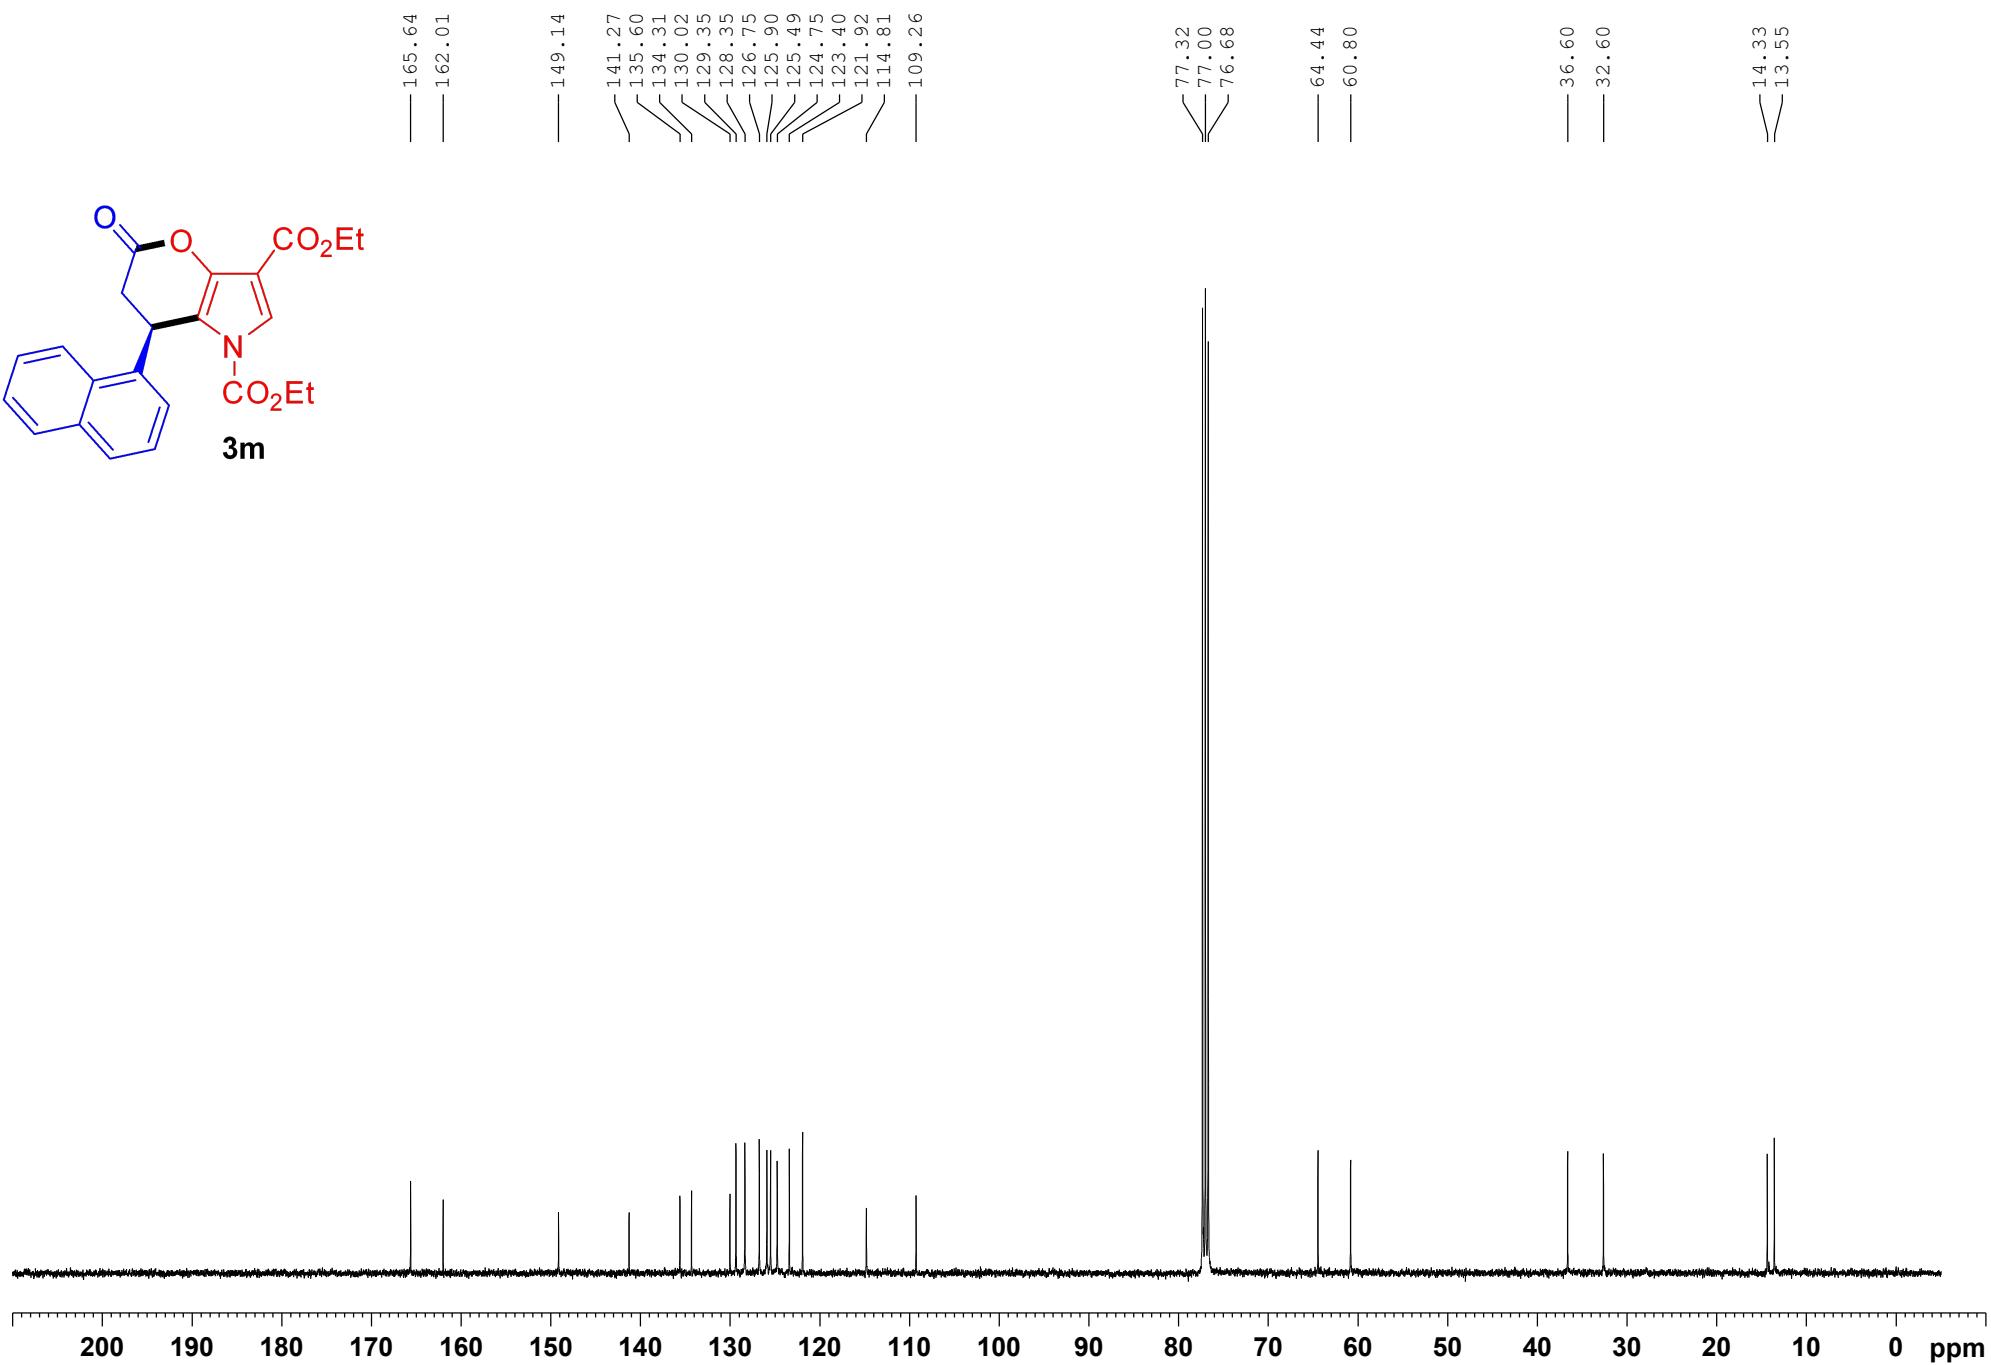

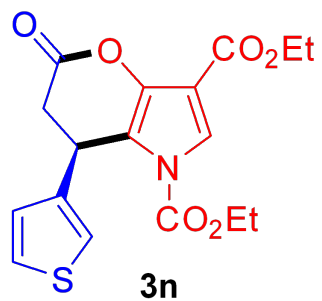

7.795  
7.284  
7.276  
7.271  
7.267  
6.930  
6.923  
6.917  
6.905

4.962  
4.944  
4.387  
4.378  
4.369  
4.360  
4.351  
4.342  
4.333  
4.324  
3.212  
3.193  
3.172  
3.153  
3.031  
3.028  
2.991  
2.988

1.396  
1.378  
1.360  
1.342  
1.324  
1.306

0.000

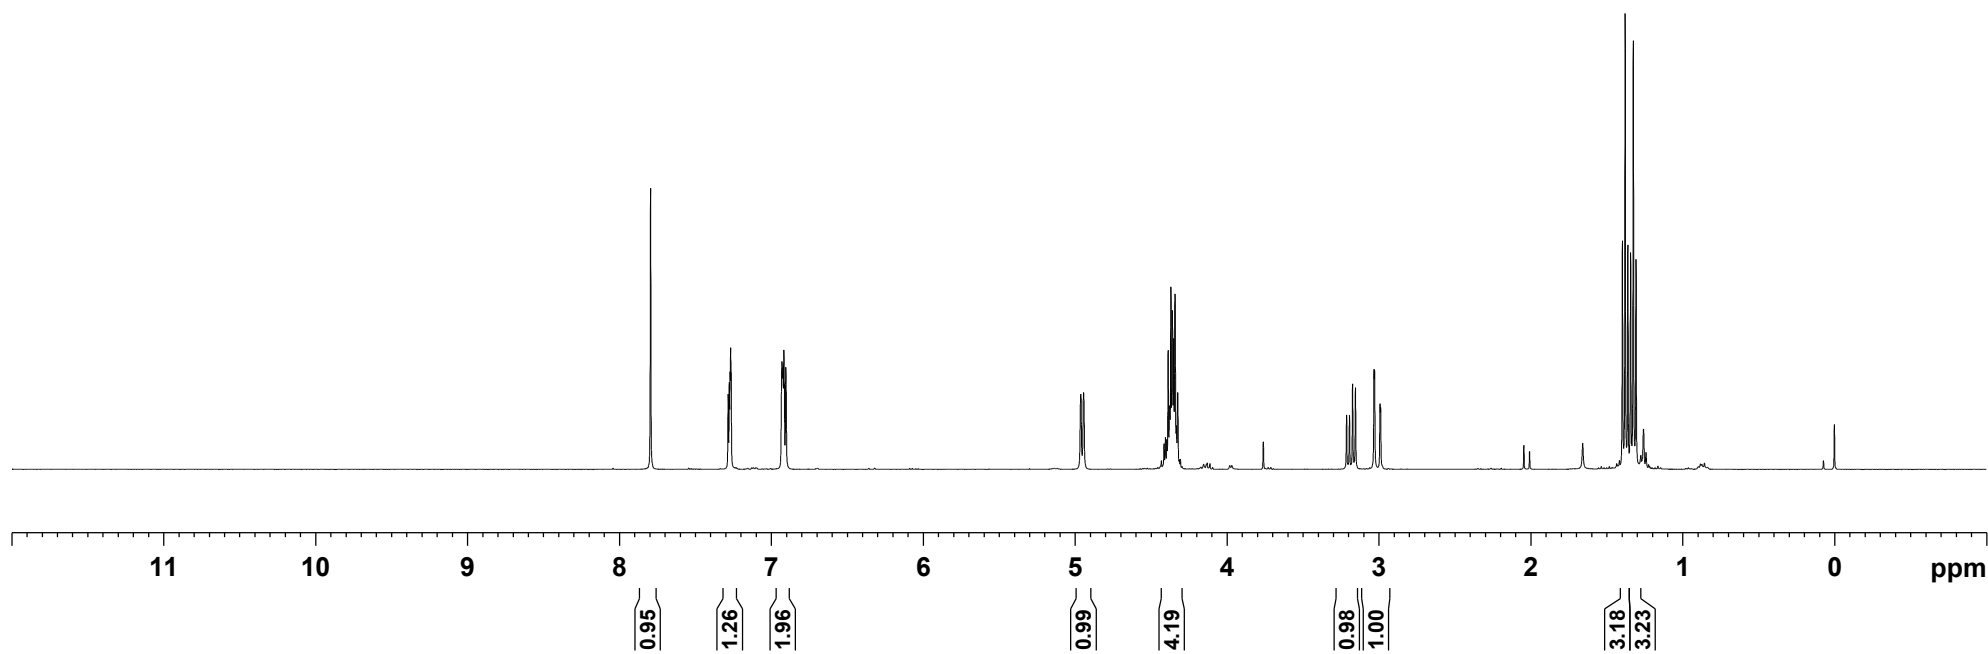

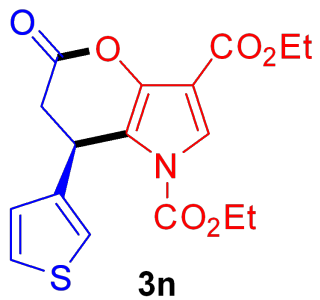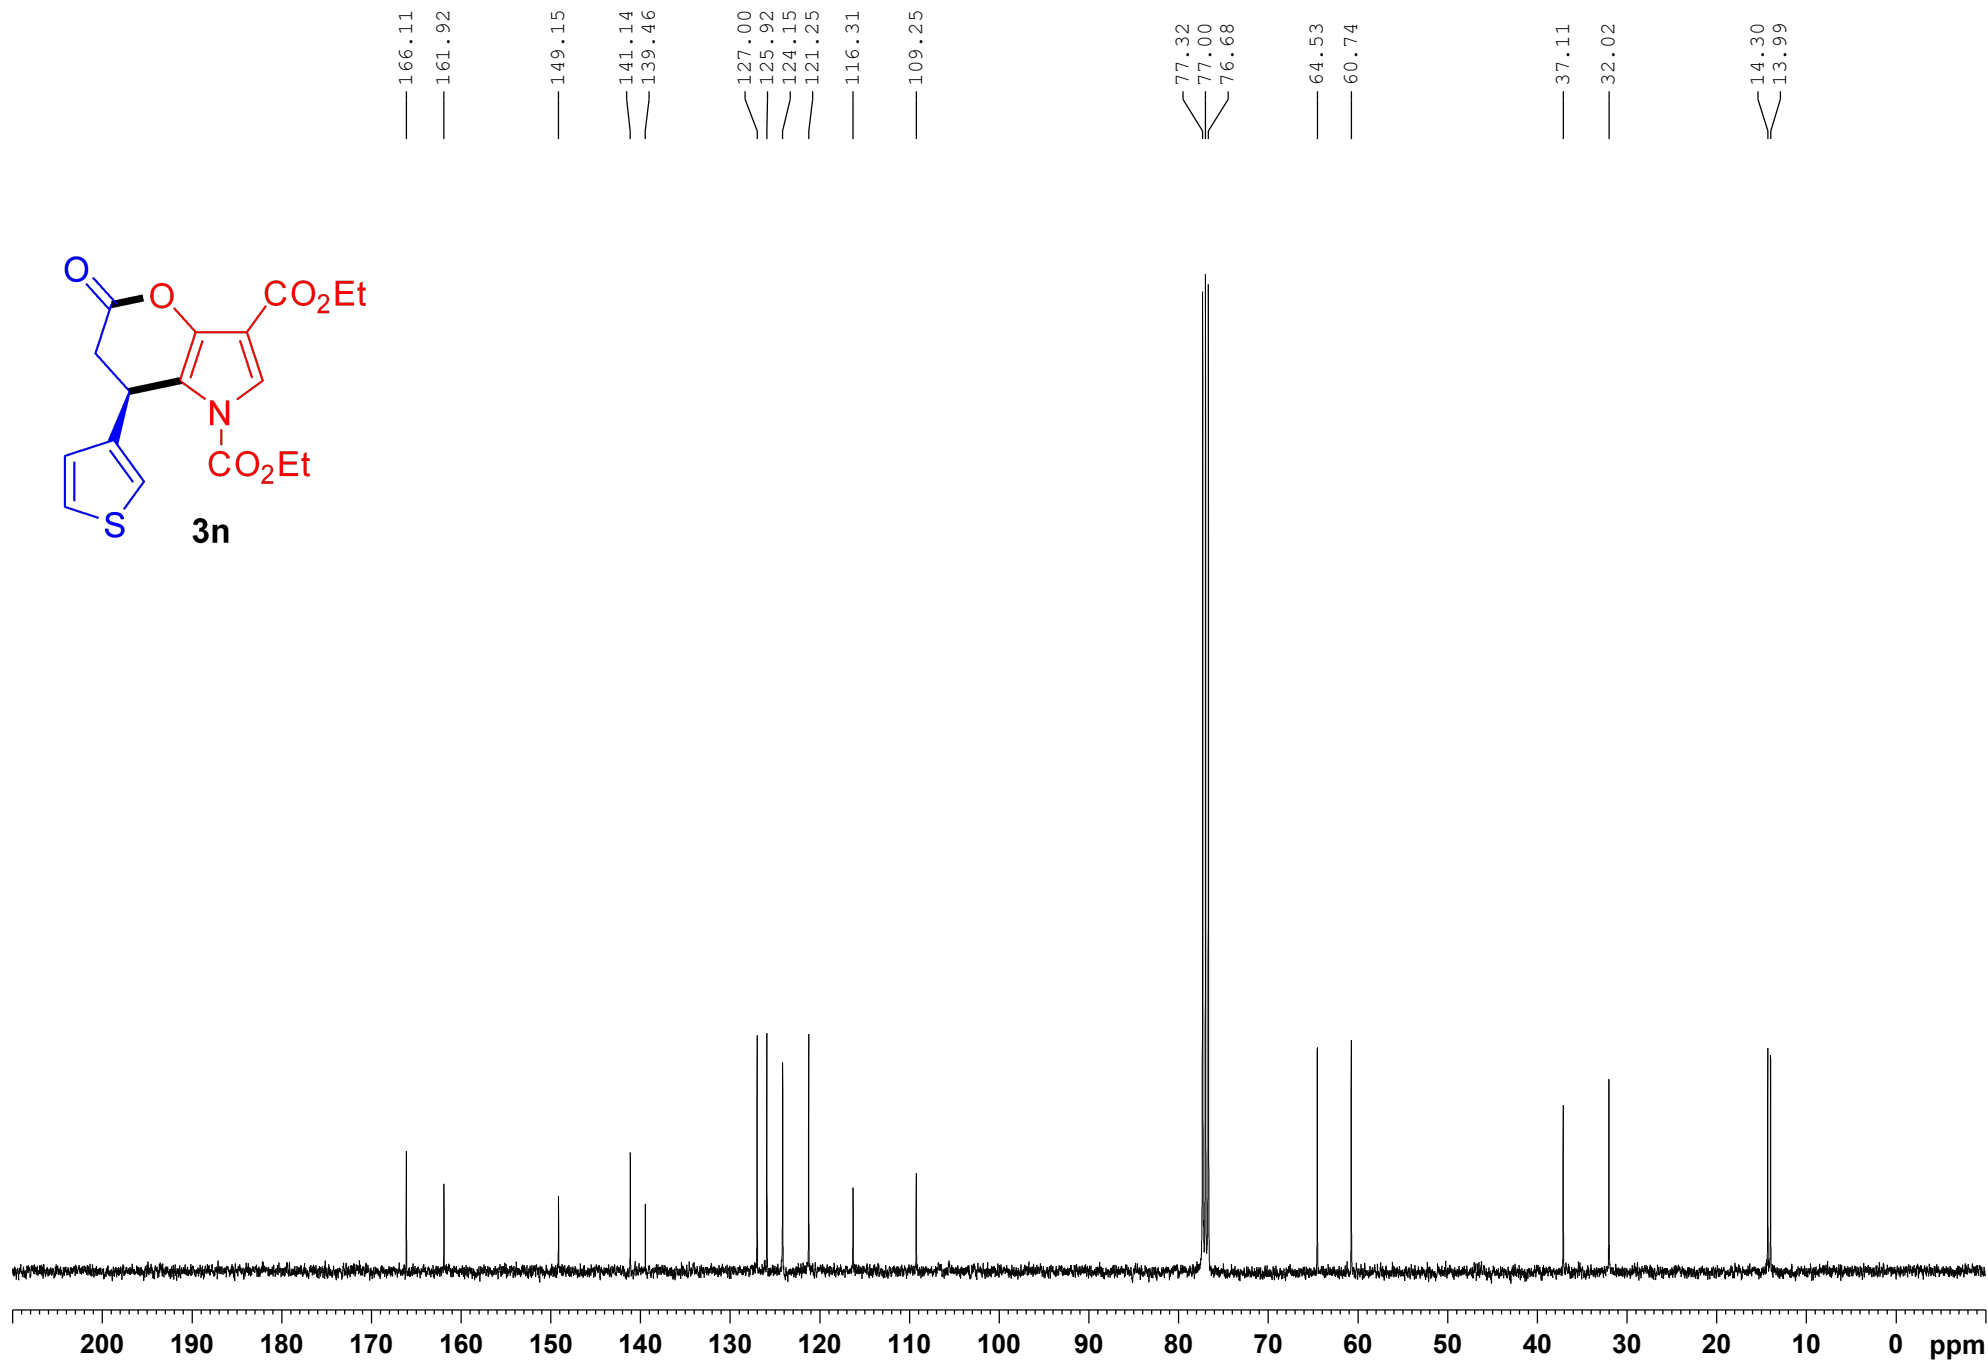

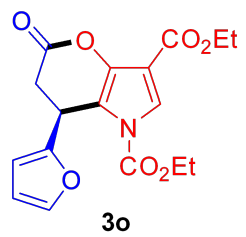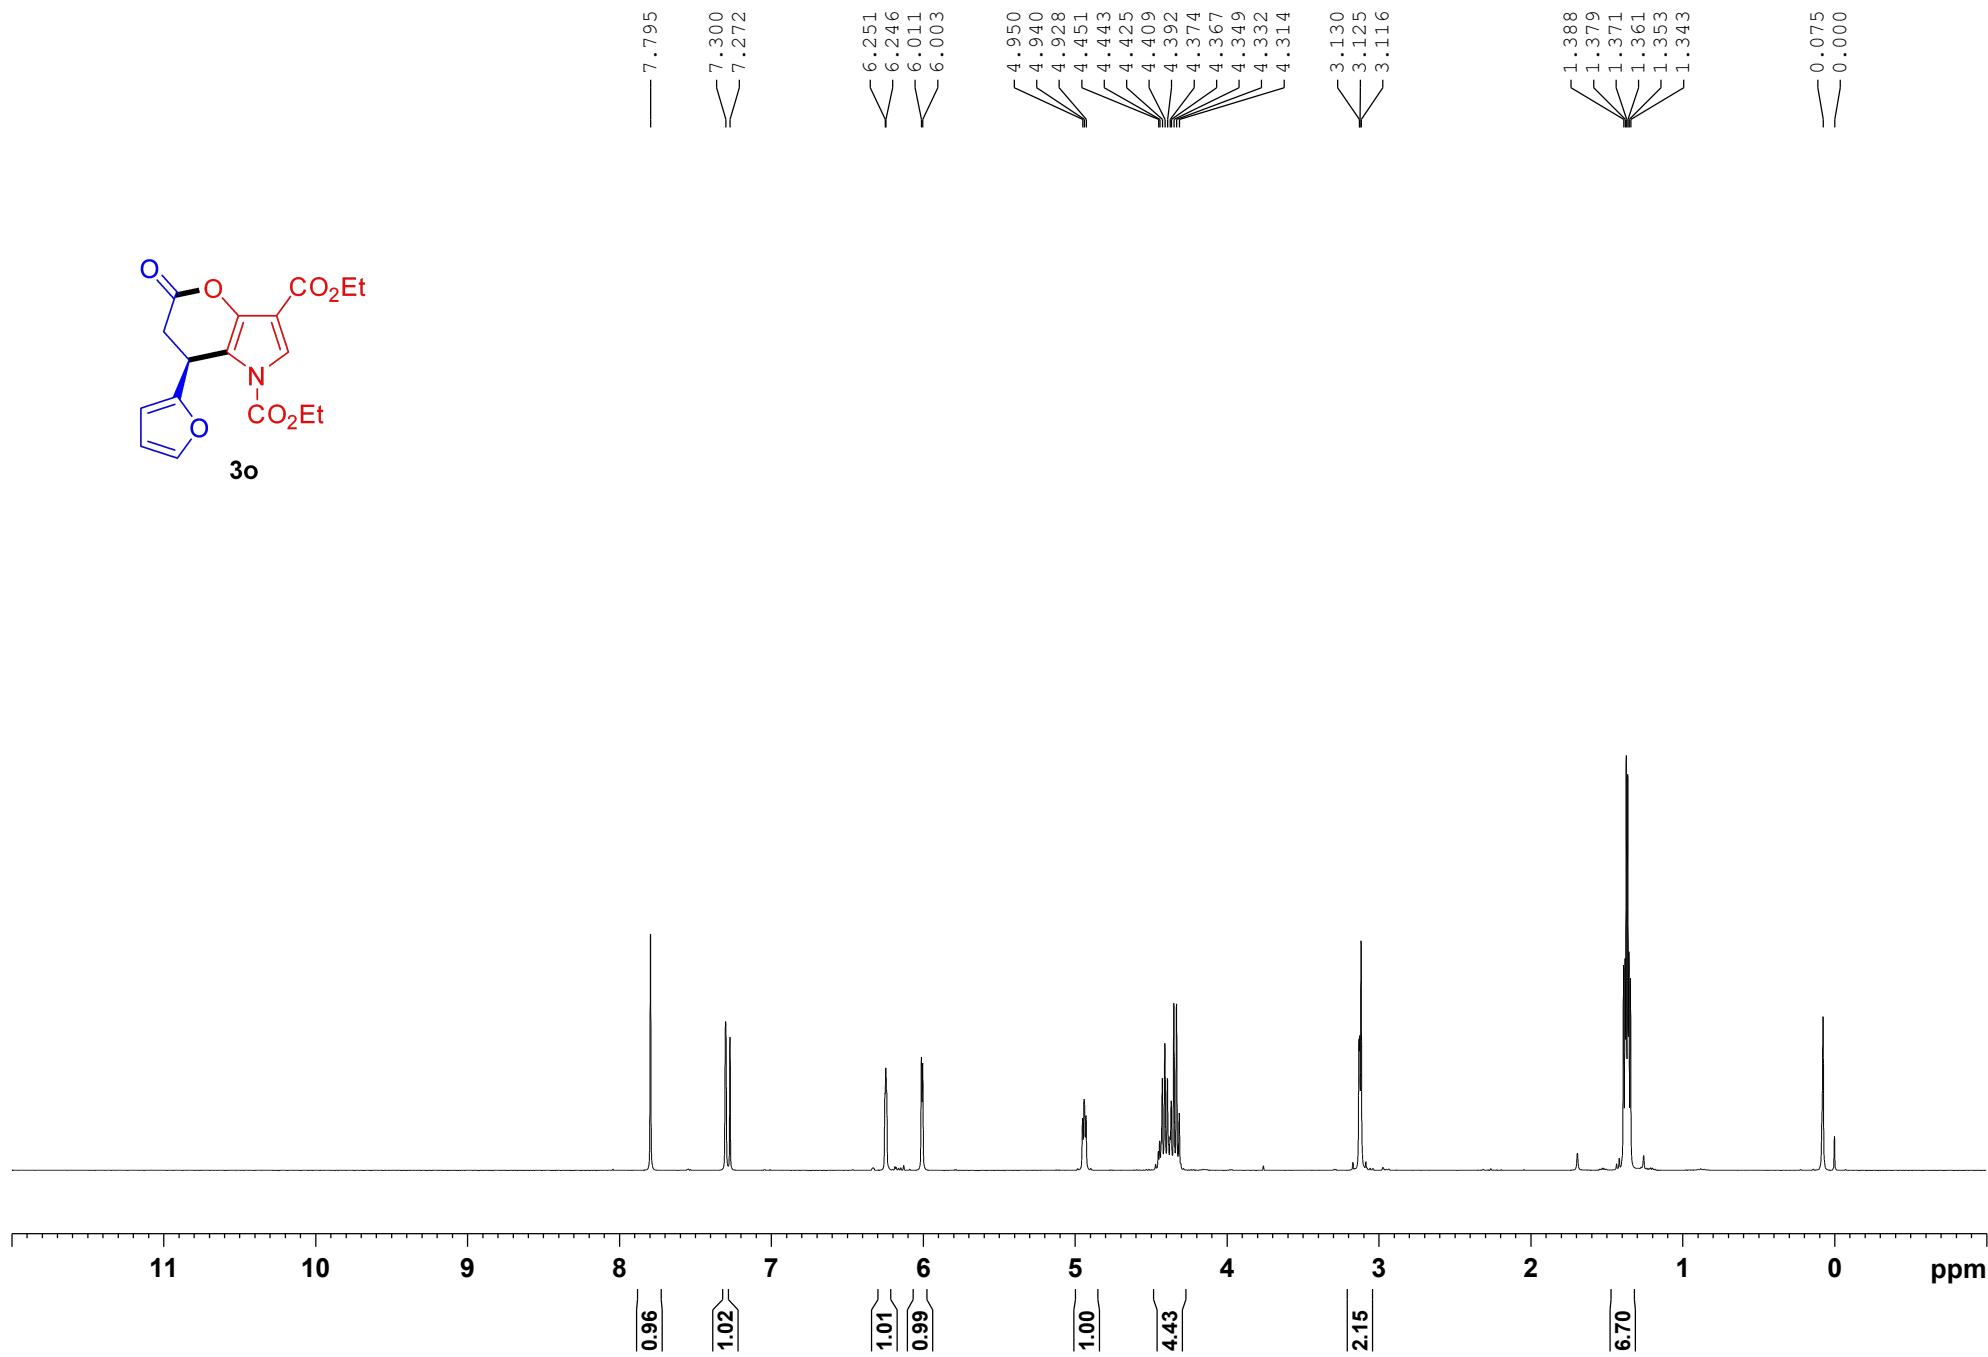

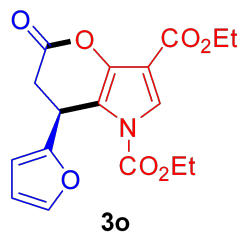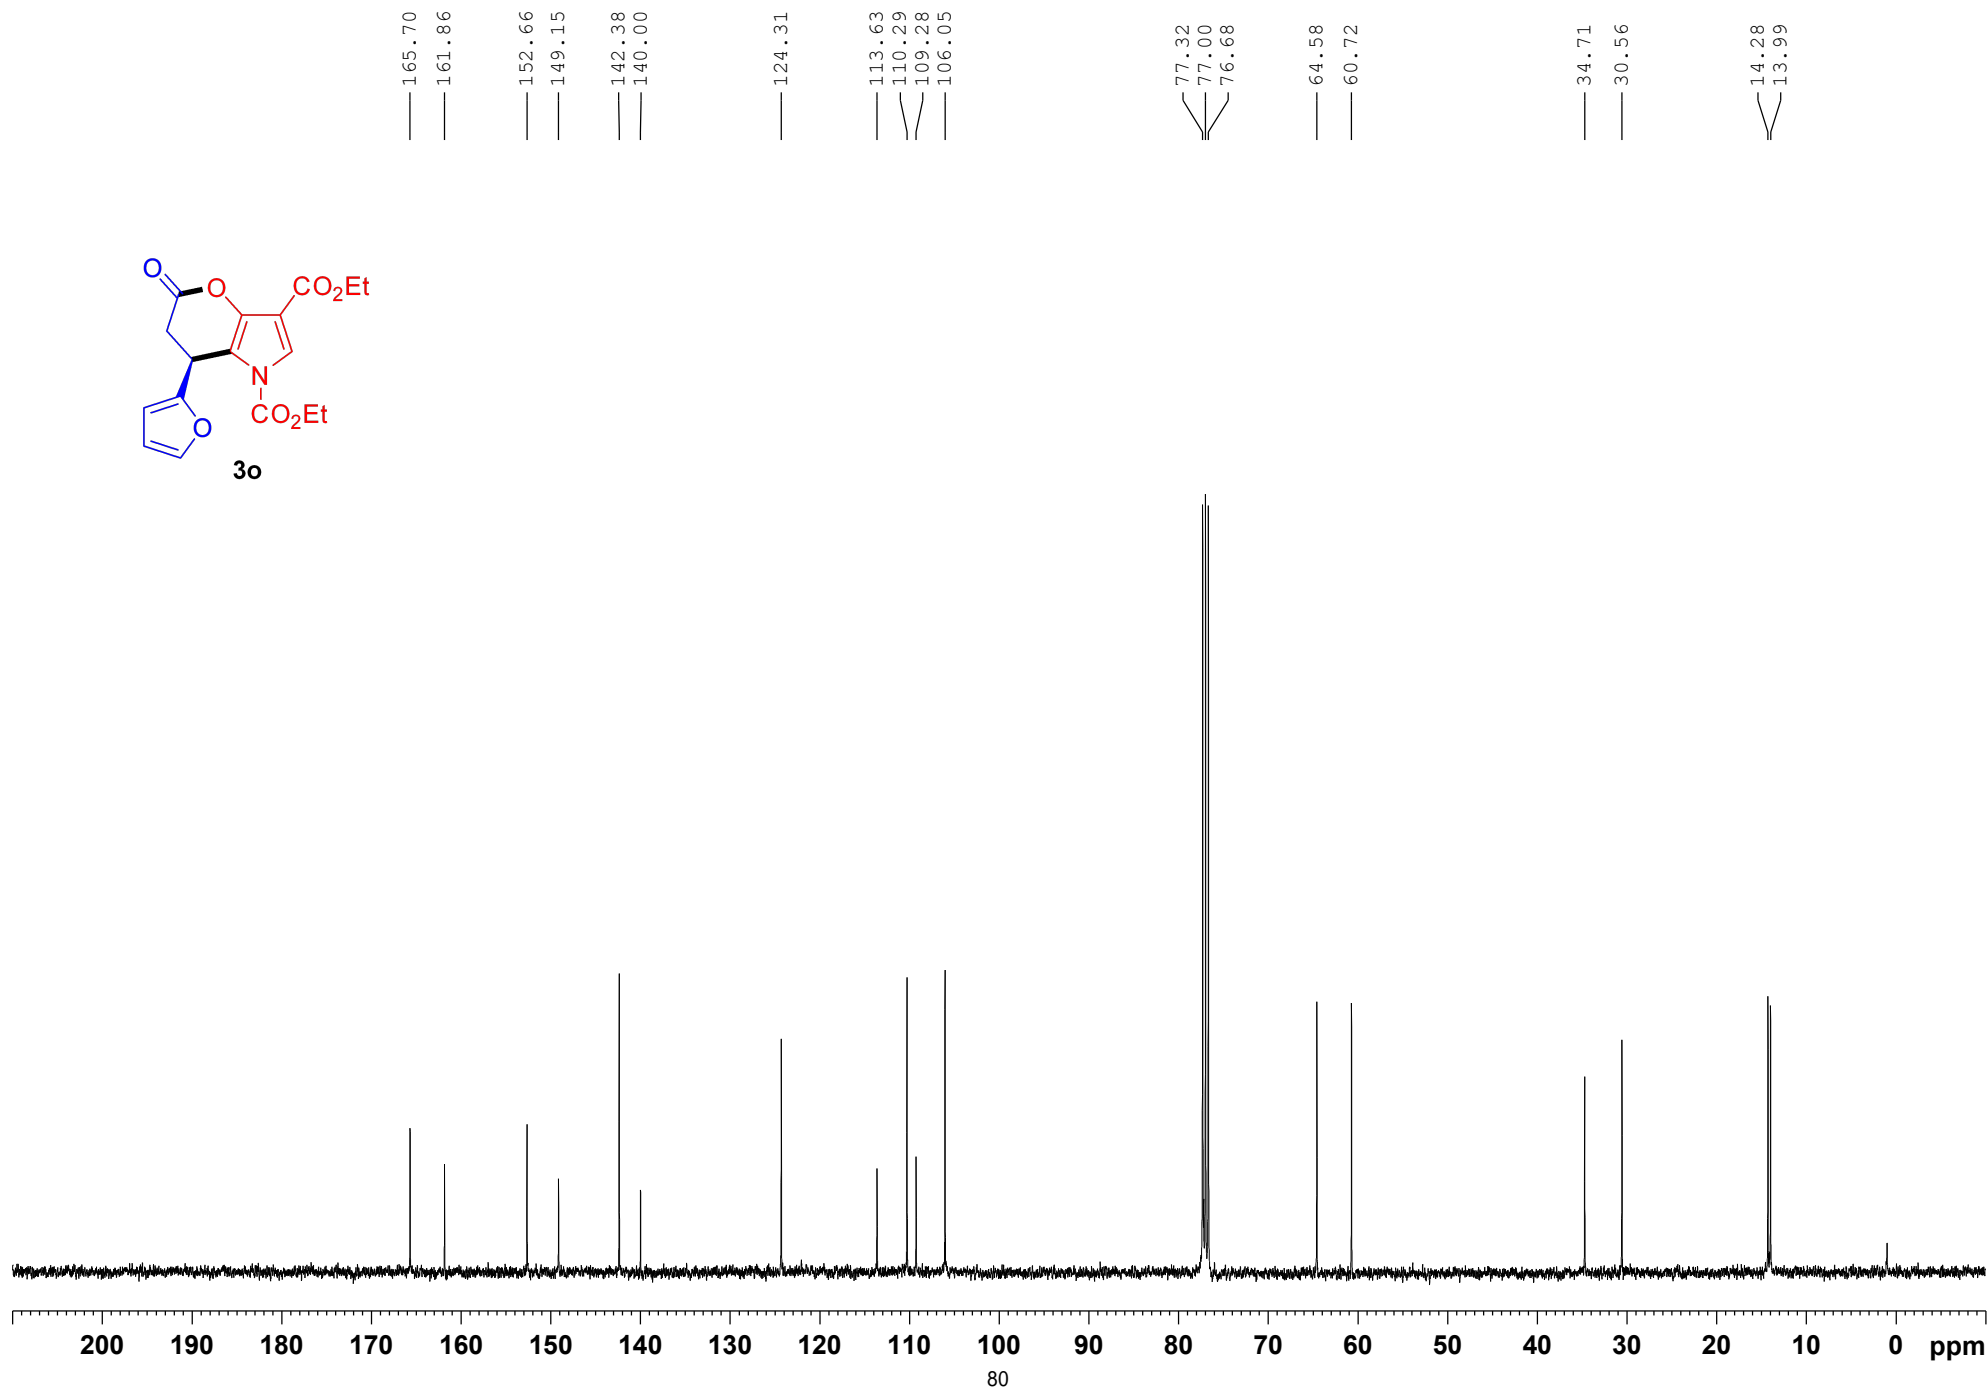



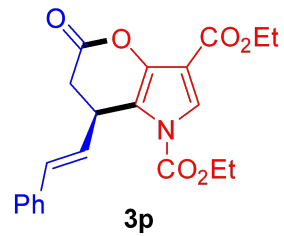

7.804  
 7.308  
 7.293  
 7.277  
 7.261  
 7.232  
 7.225  
 7.216  
 6.357  
 6.317  
 6.233  
 6.217  
 6.193  
 6.177

4.470  
 4.463  
 4.453  
 4.436  
 4.422  
 4.404  
 4.375  
 4.357  
 4.339  
 4.321  
 3.113  
 3.094  
 3.073  
 3.055  
 2.998  
 2.962  
 2.959

1.432  
 1.414  
 1.395  
 1.376  
 1.359

0.000

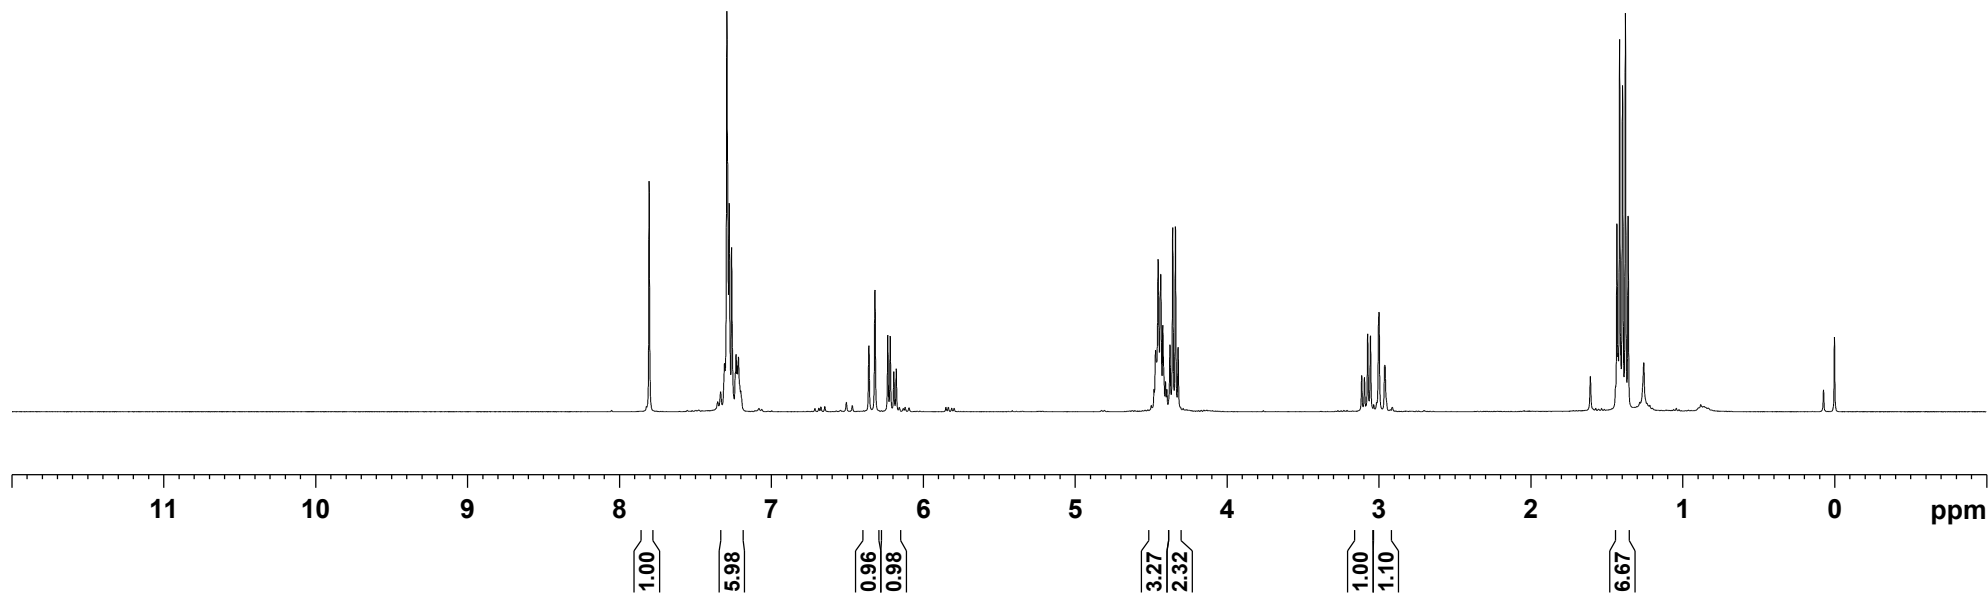

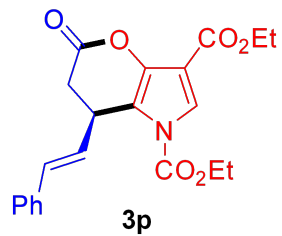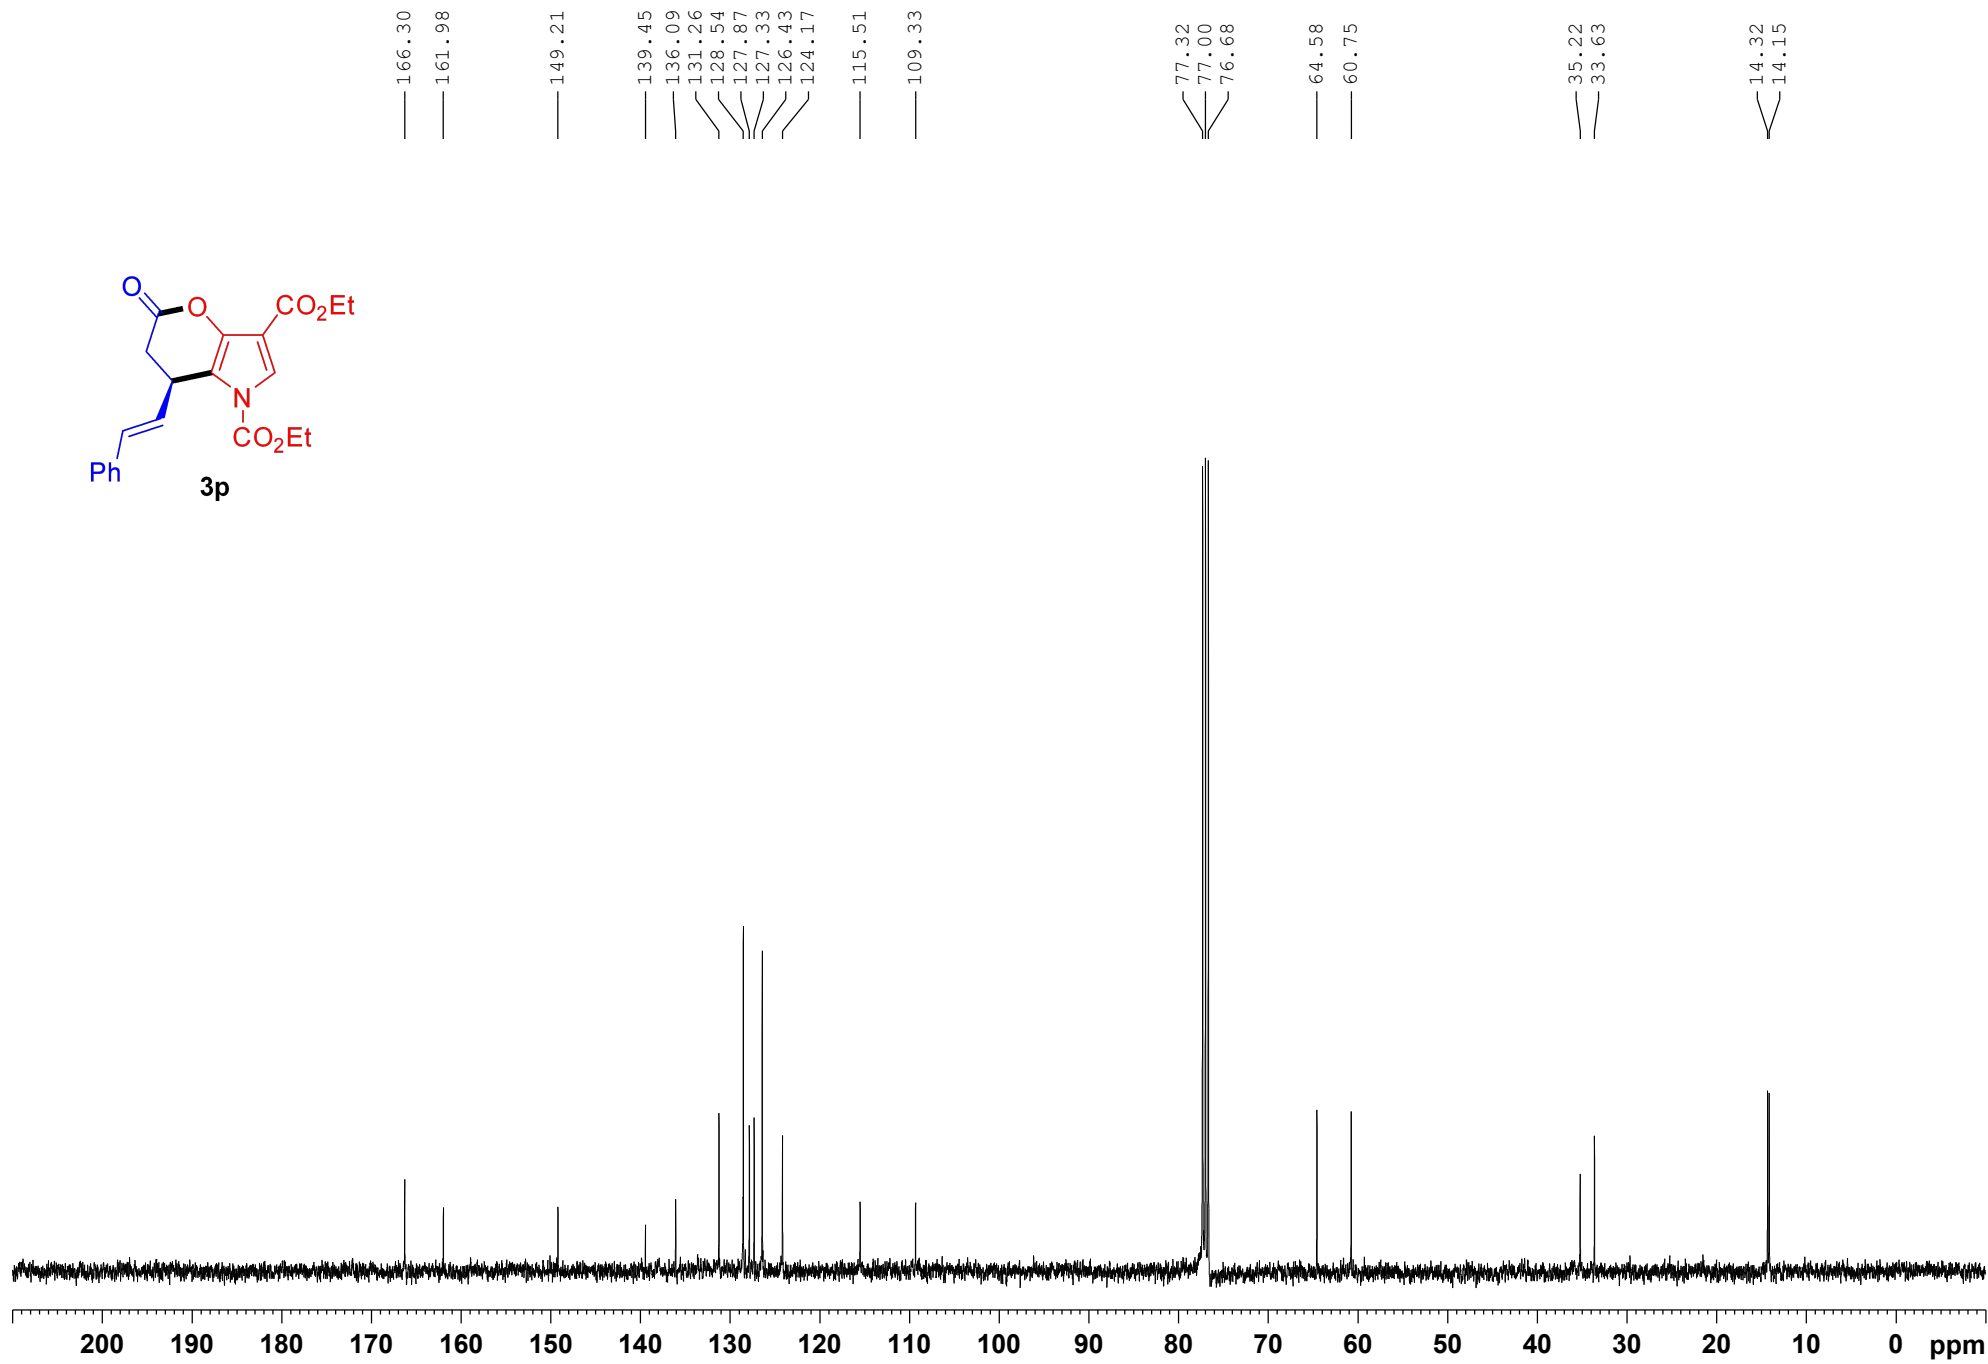

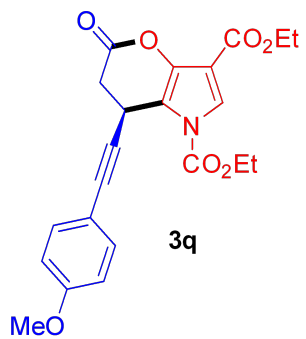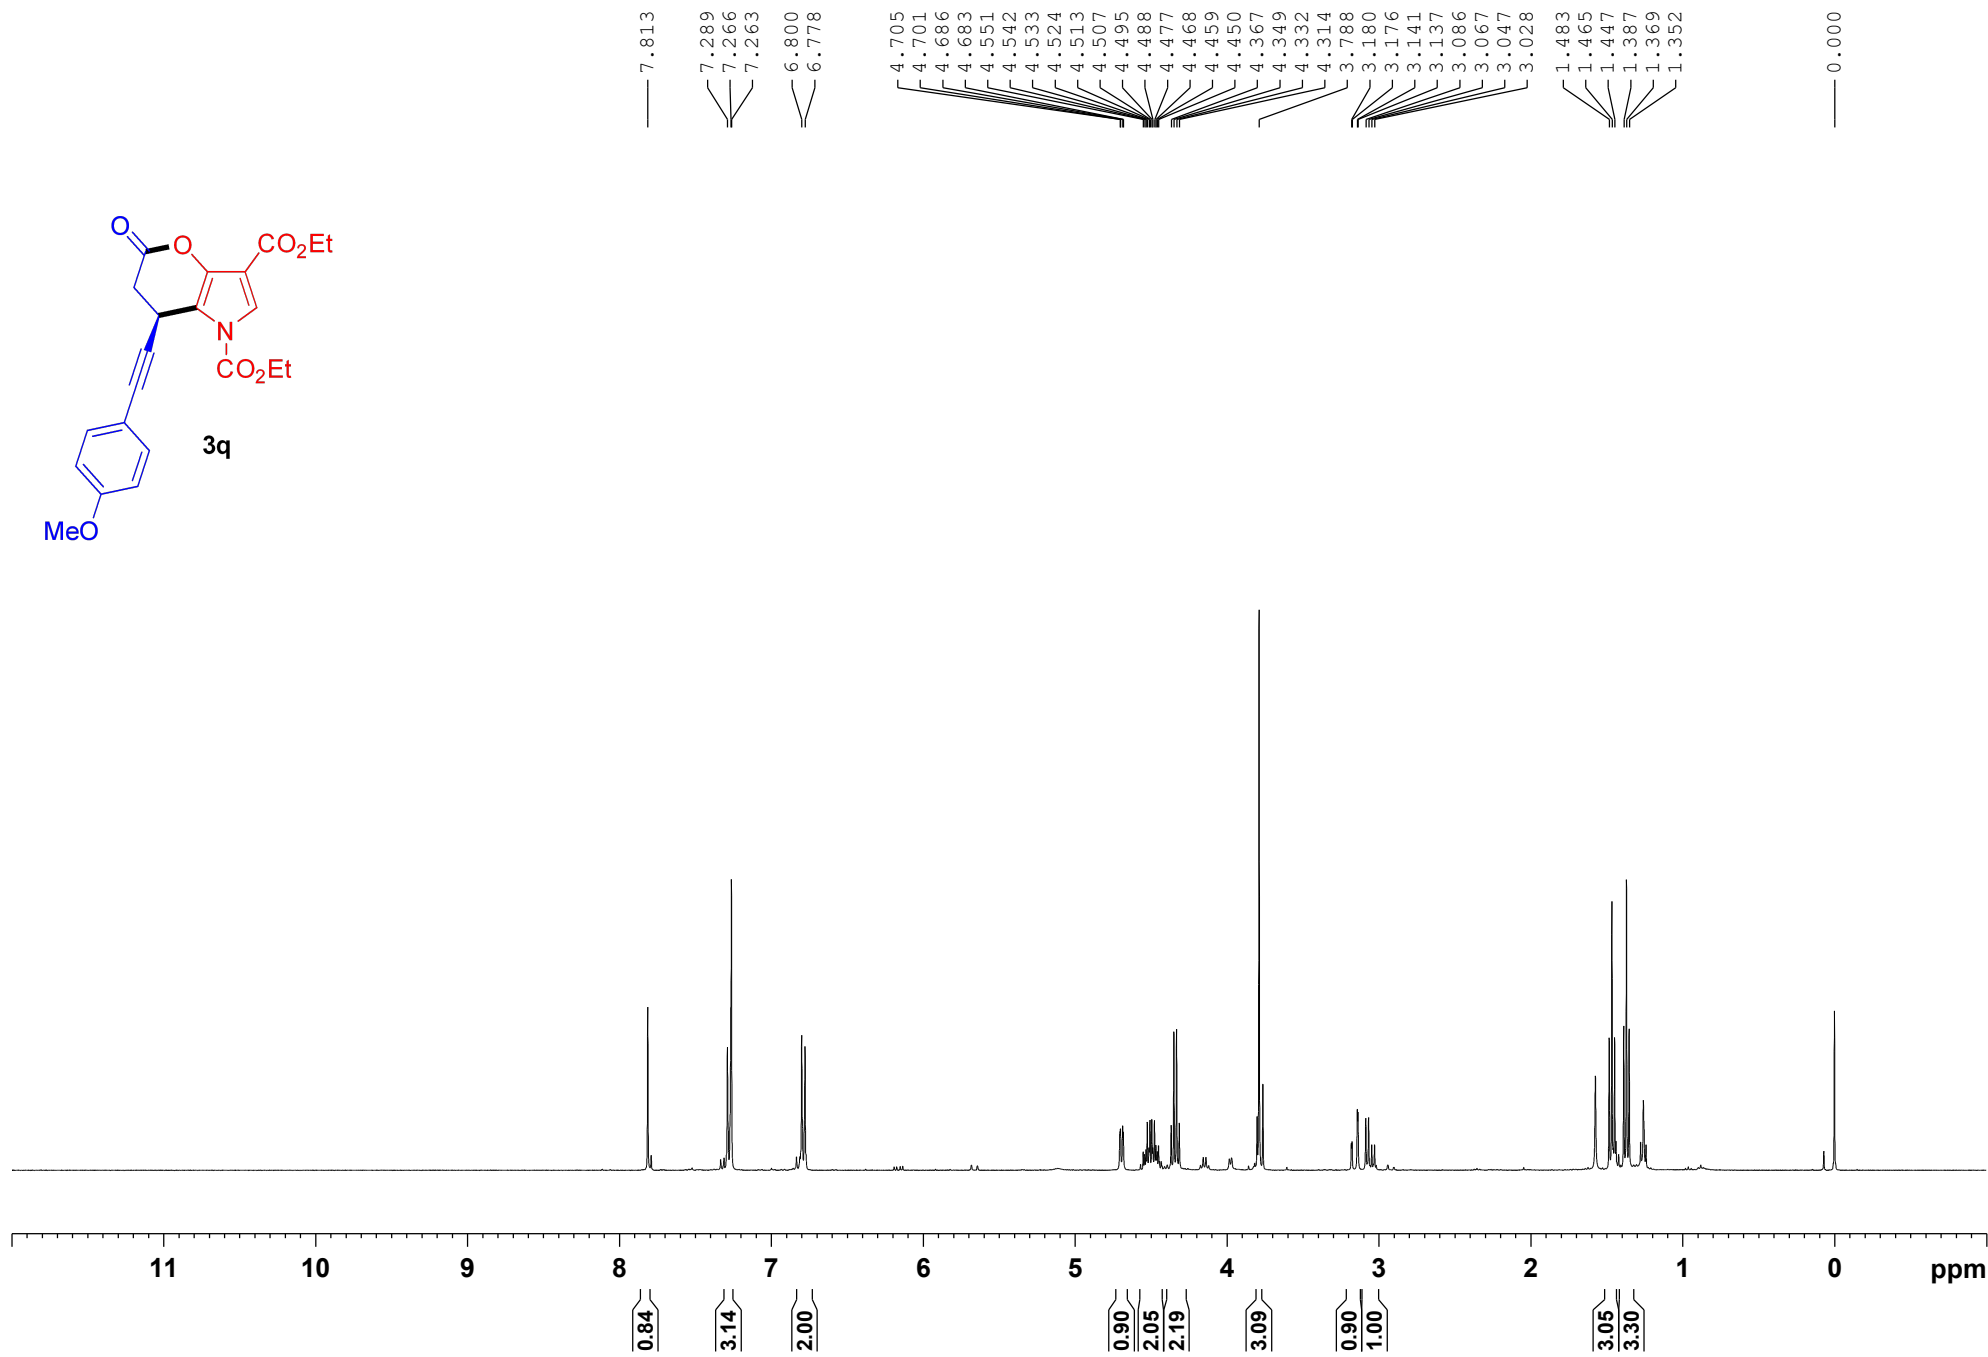

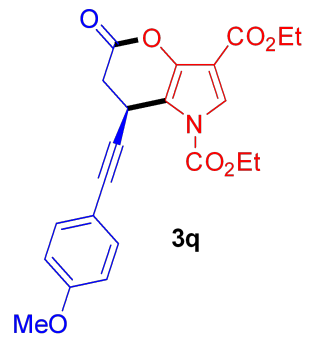

165.27  
161.87  
159.68

149.23

139.33

133.20

124.26

114.35  
113.83  
113.08  
109.40  
105.58

84.37  
83.23  
77.32  
77.00  
76.68

64.79  
60.77  
55.25

24.08

14.32  
14.14

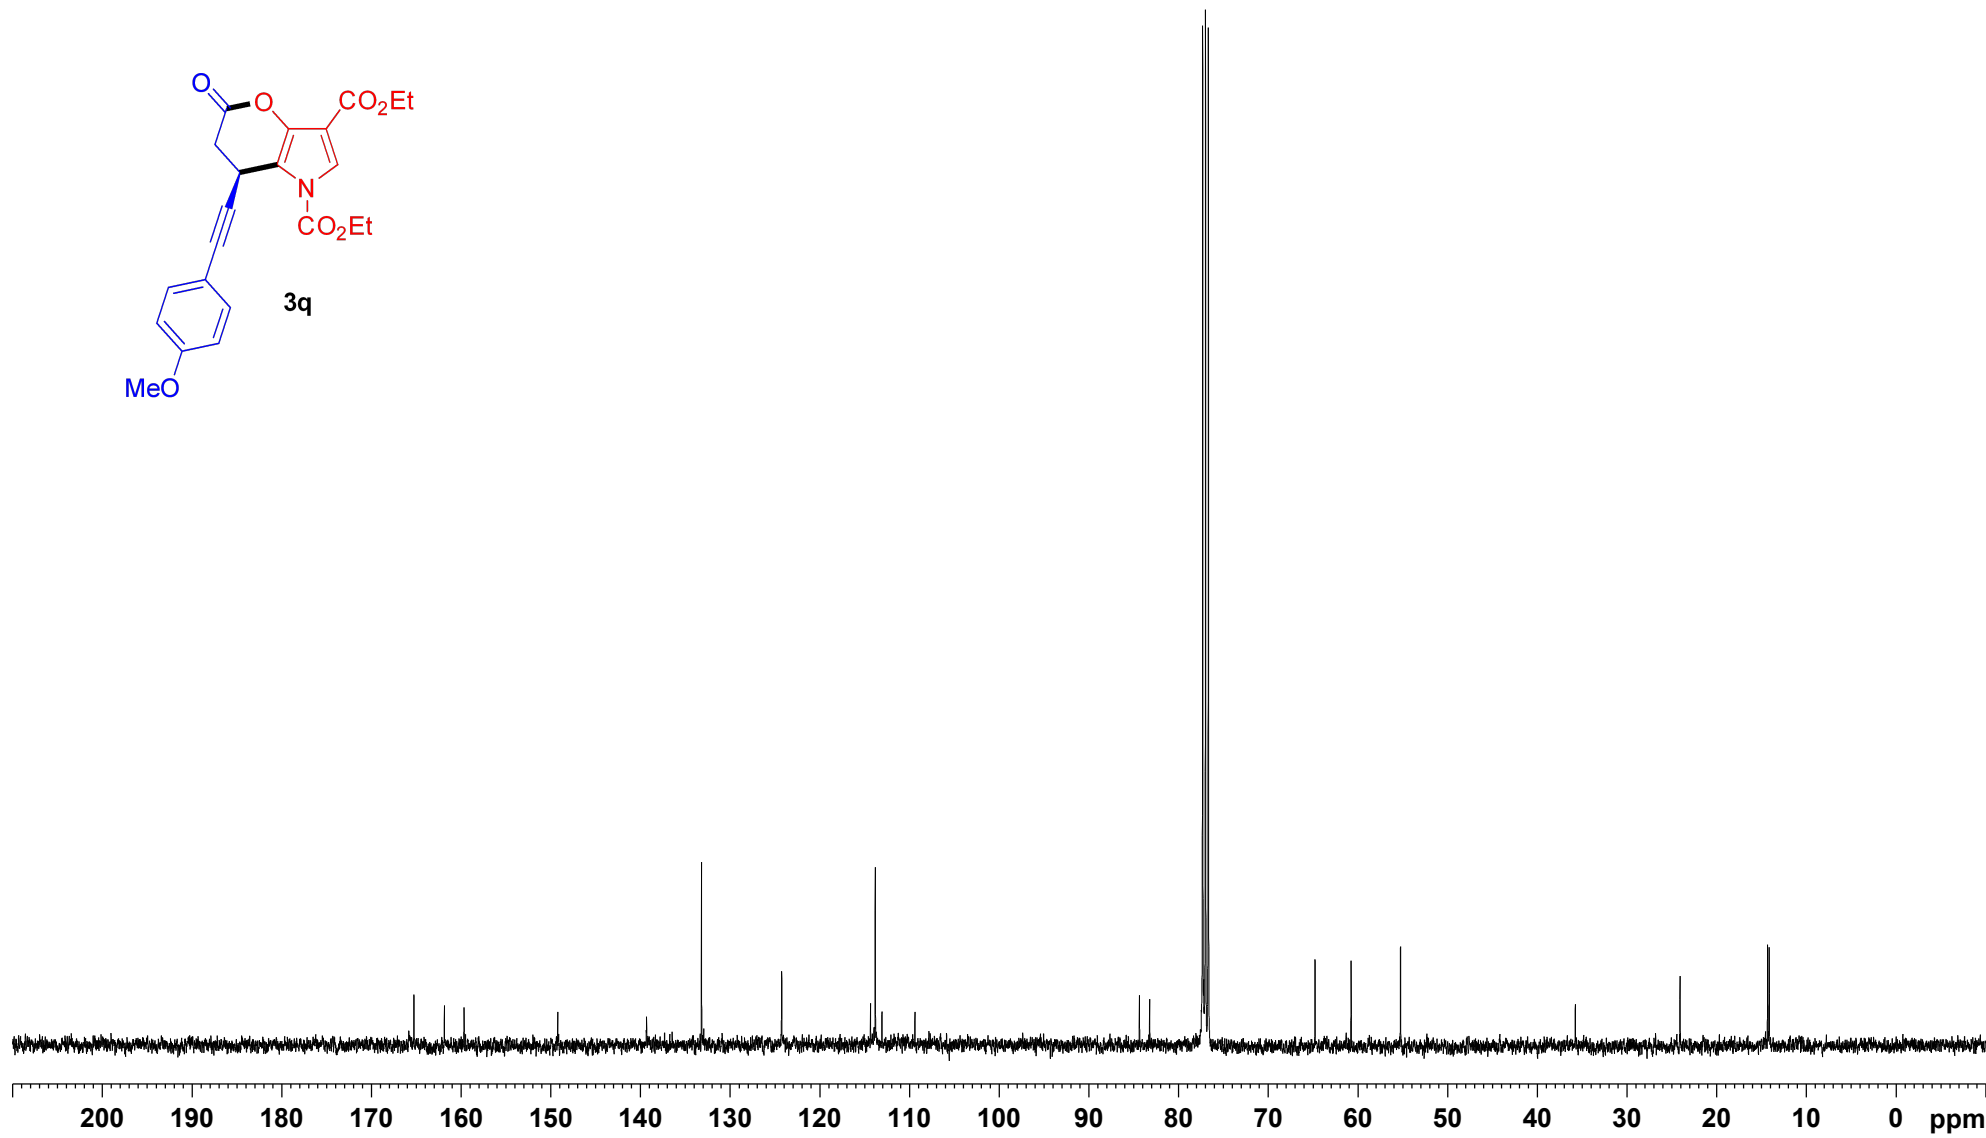

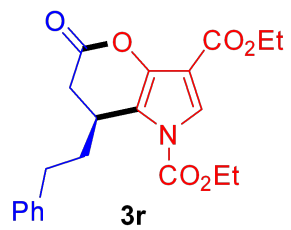

7.739  
7.283  
7.263  
7.247  
7.195  
7.177  
7.150  
7.131

4.429  
4.412  
4.394  
4.376  
4.359  
4.342  
4.324  
4.306  
3.688  
2.934  
2.919  
2.757  
2.745  
2.722  
2.711  
2.696  
2.684  
2.643  
2.628  
2.613  
2.602  
2.593  
2.567  
2.062  
2.048  
2.035  
2.017  
2.002  
1.989  
1.975  
1.897  
1.883  
1.861  
1.849  
1.836  
1.802  
1.421  
1.404  
1.384  
1.366  
1.348  
0.071  
-0.000

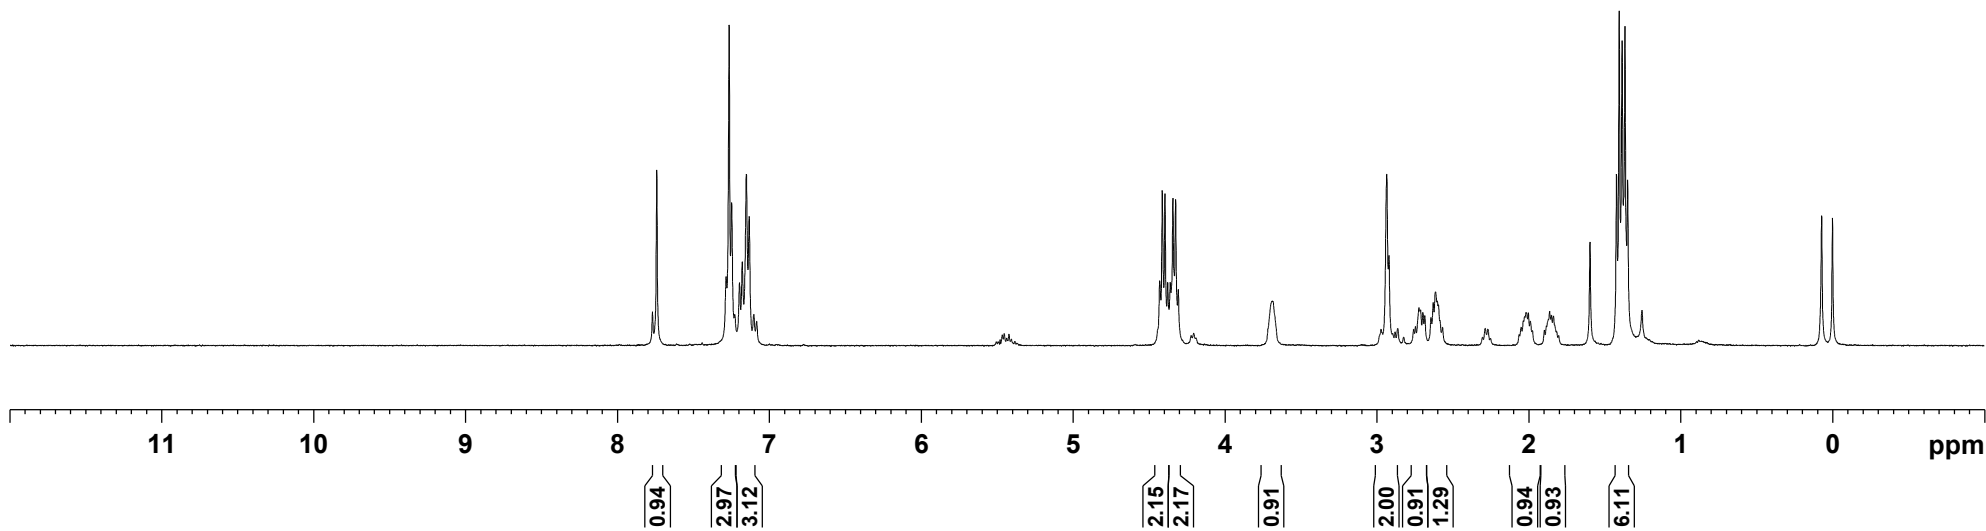

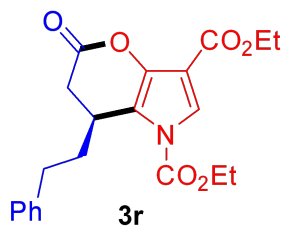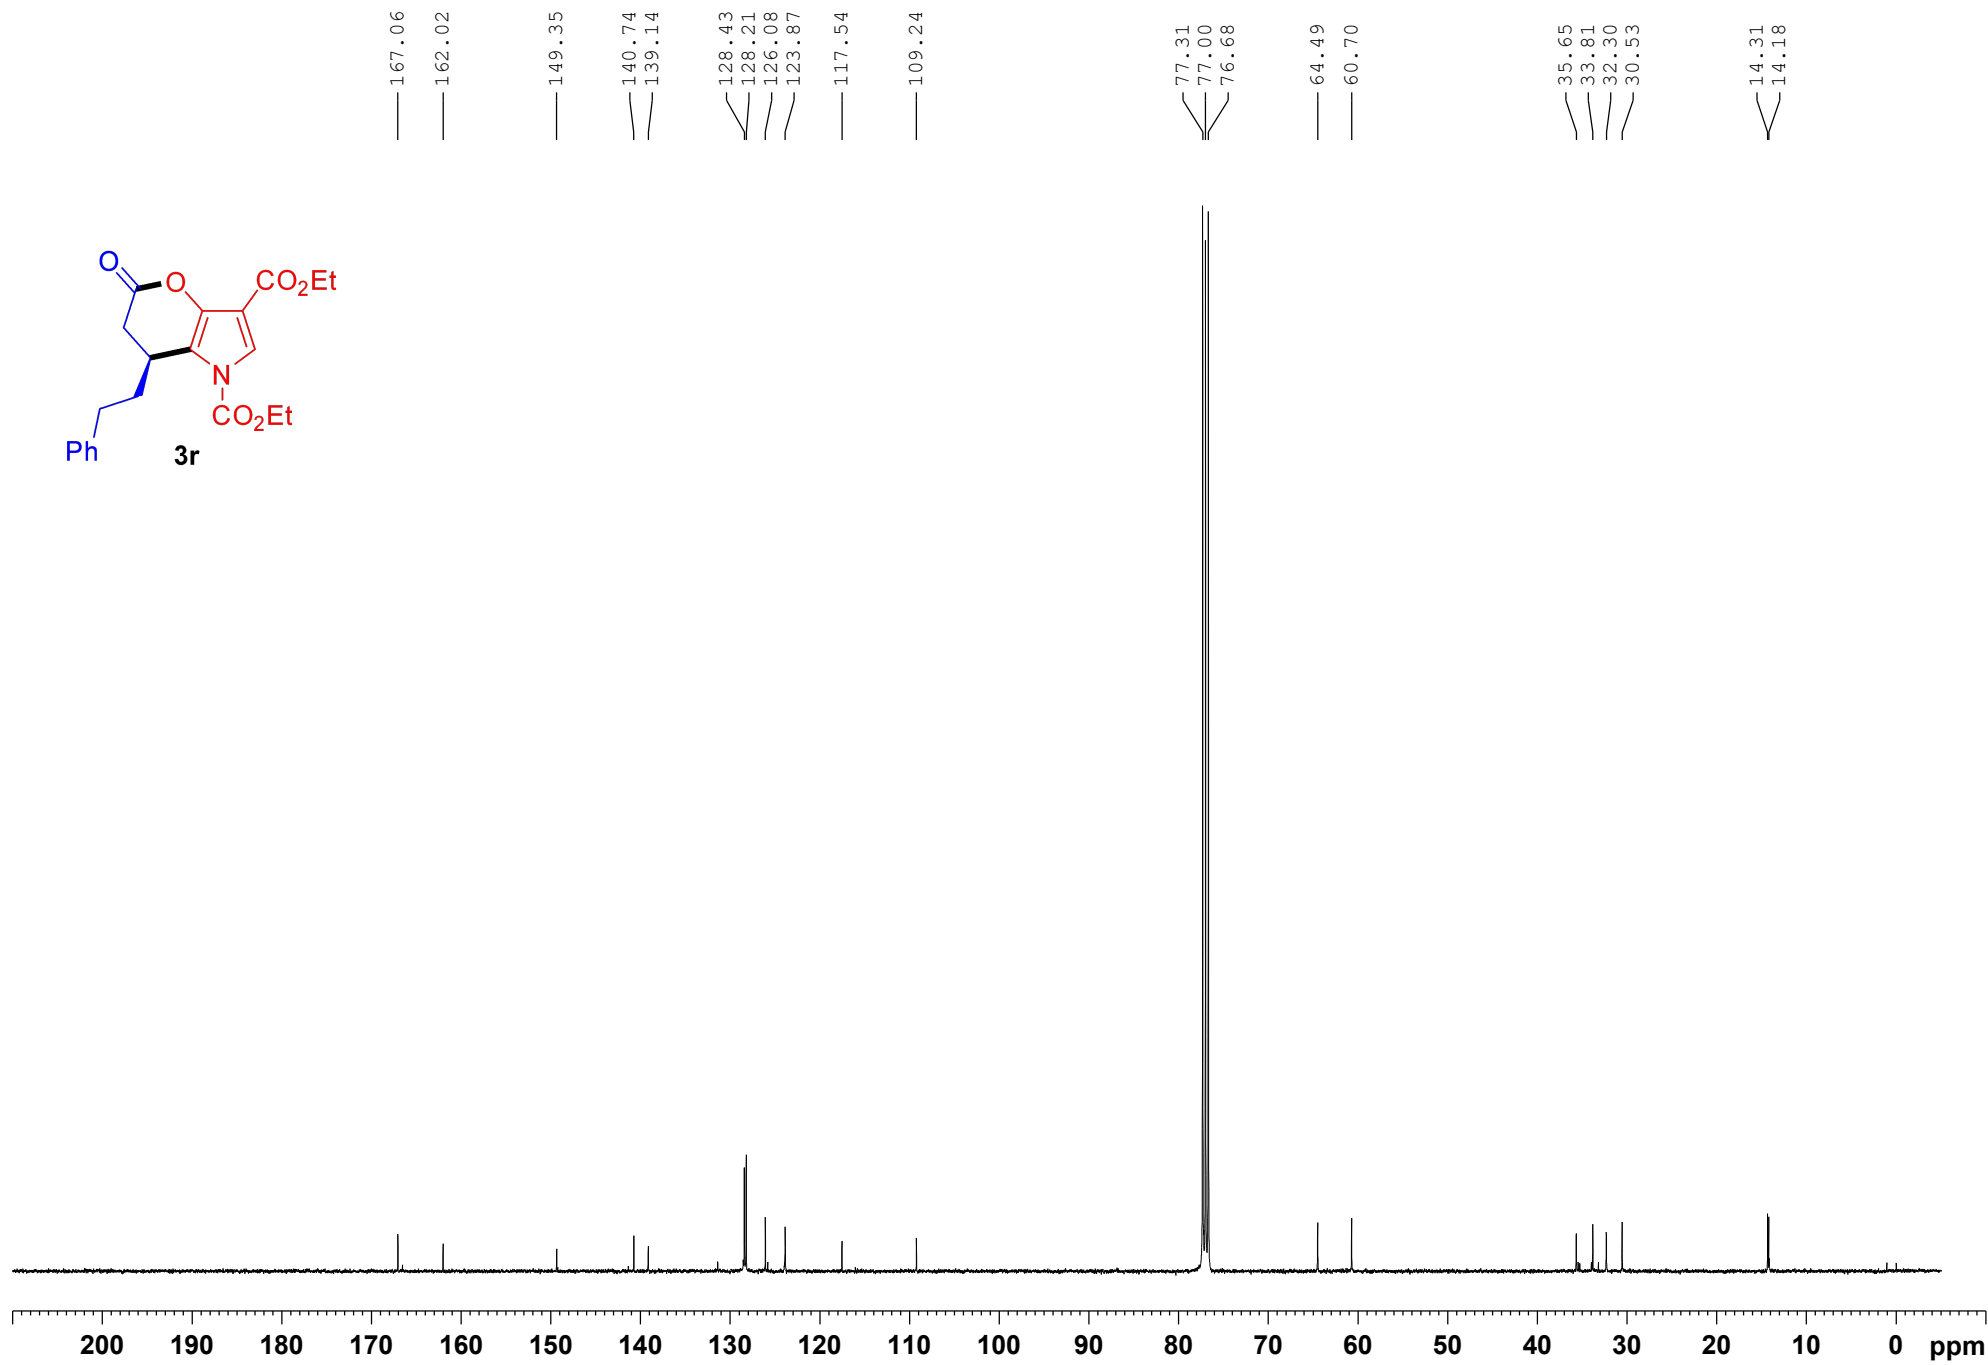

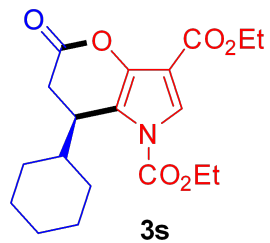

7.773  
7.770

7.277

4.501  
4.492  
4.483  
4.475  
4.457  
4.441  
4.439  
4.430  
4.424  
4.415  
4.359  
4.352  
4.348  
4.342  
4.337  
4.334  
4.330  
4.324  
4.320  
4.316  
4.313  
4.306  
4.303  
4.299  
3.506  
3.496  
3.486  
3.477  
2.932  
2.890  
2.784  
2.764  
2.743  
2.723  
1.752  
1.718  
1.646  
1.637  
1.567  
1.538  
1.461  
1.443  
1.425  
1.381  
1.363  
1.345  
1.254  
1.227  
1.203  
1.133  
1.108  
1.083  
0.073  
0.000

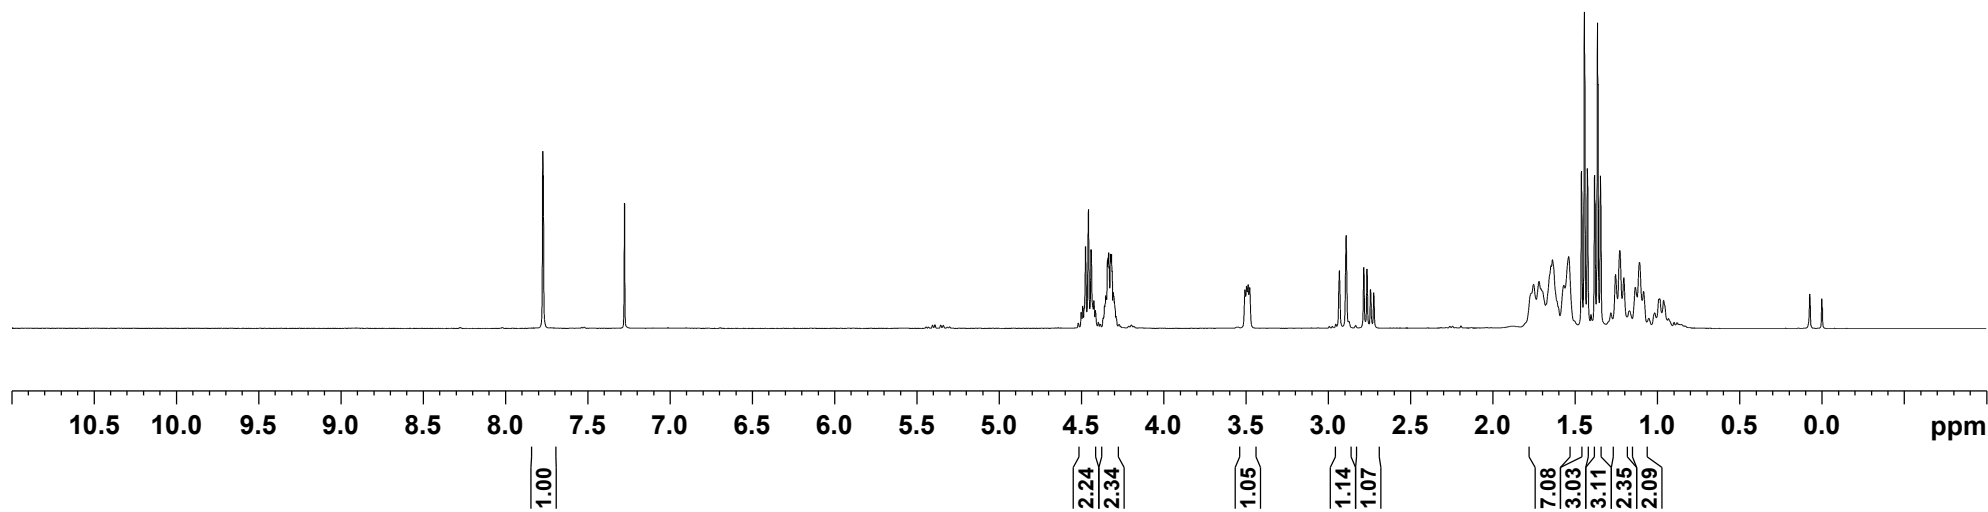

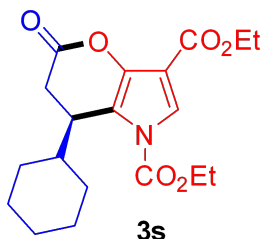

— 167.88

— 162.05

— 149.47

— 139.60

— 124.02

— 116.78

— 109.06

77.32  
77.00  
76.68

— 64.42

— 60.63

— 41.79

36.23

31.09

30.36

27.67

26.39

26.15

26.02

14.28

14.11

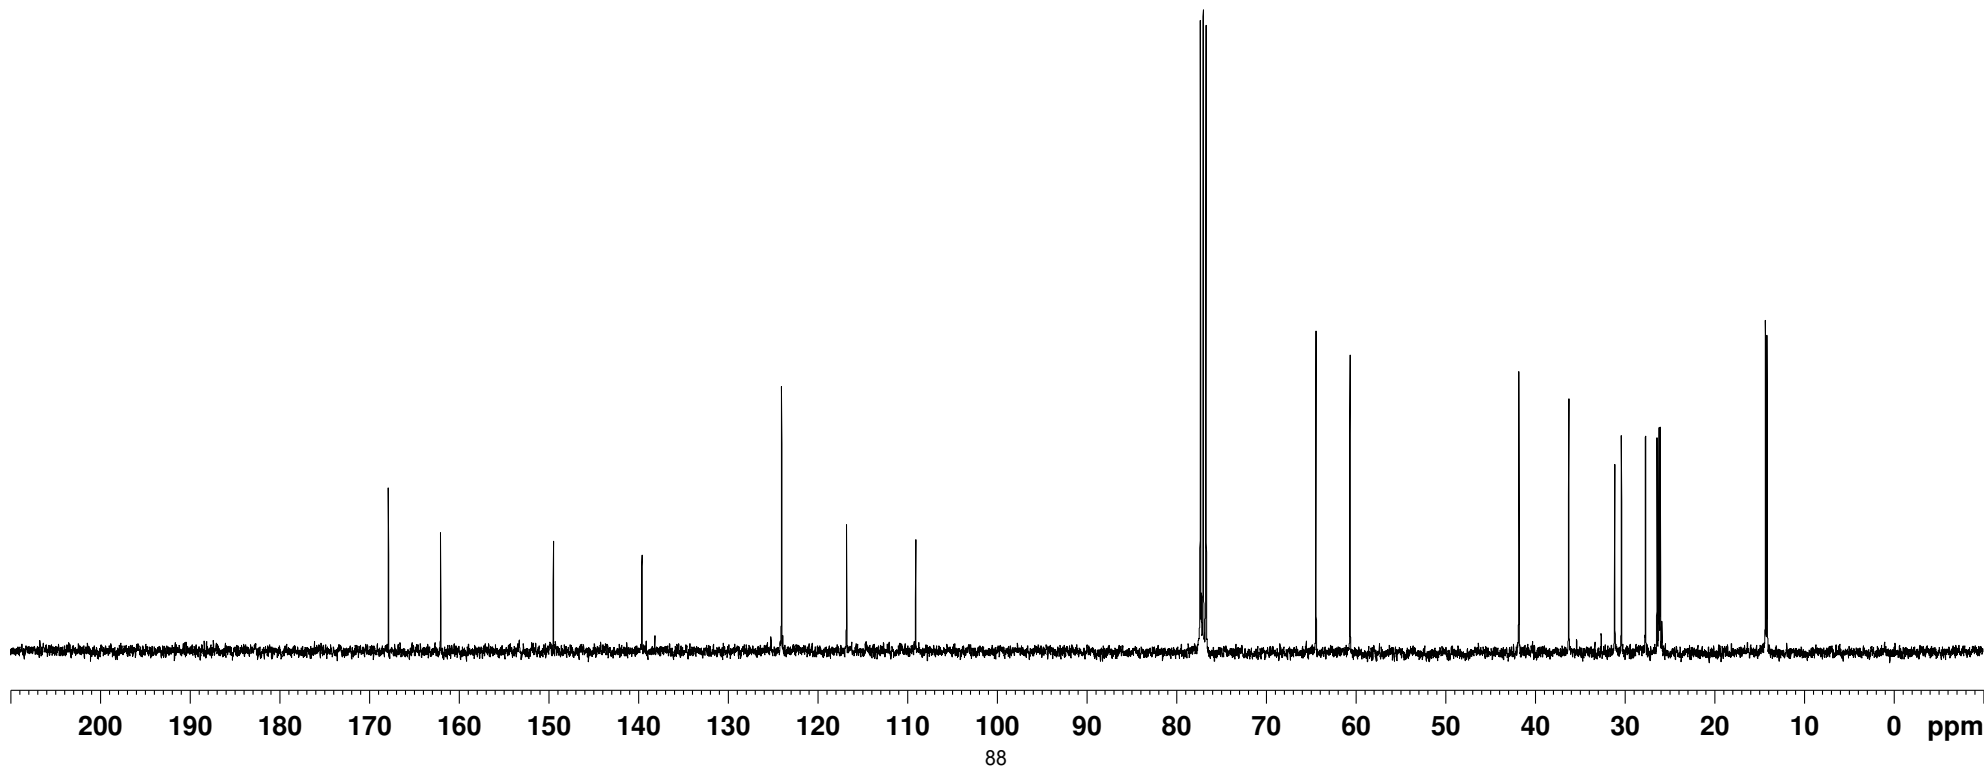



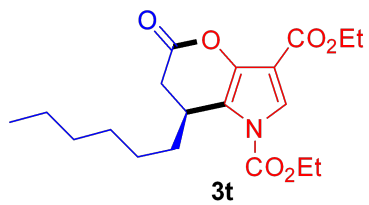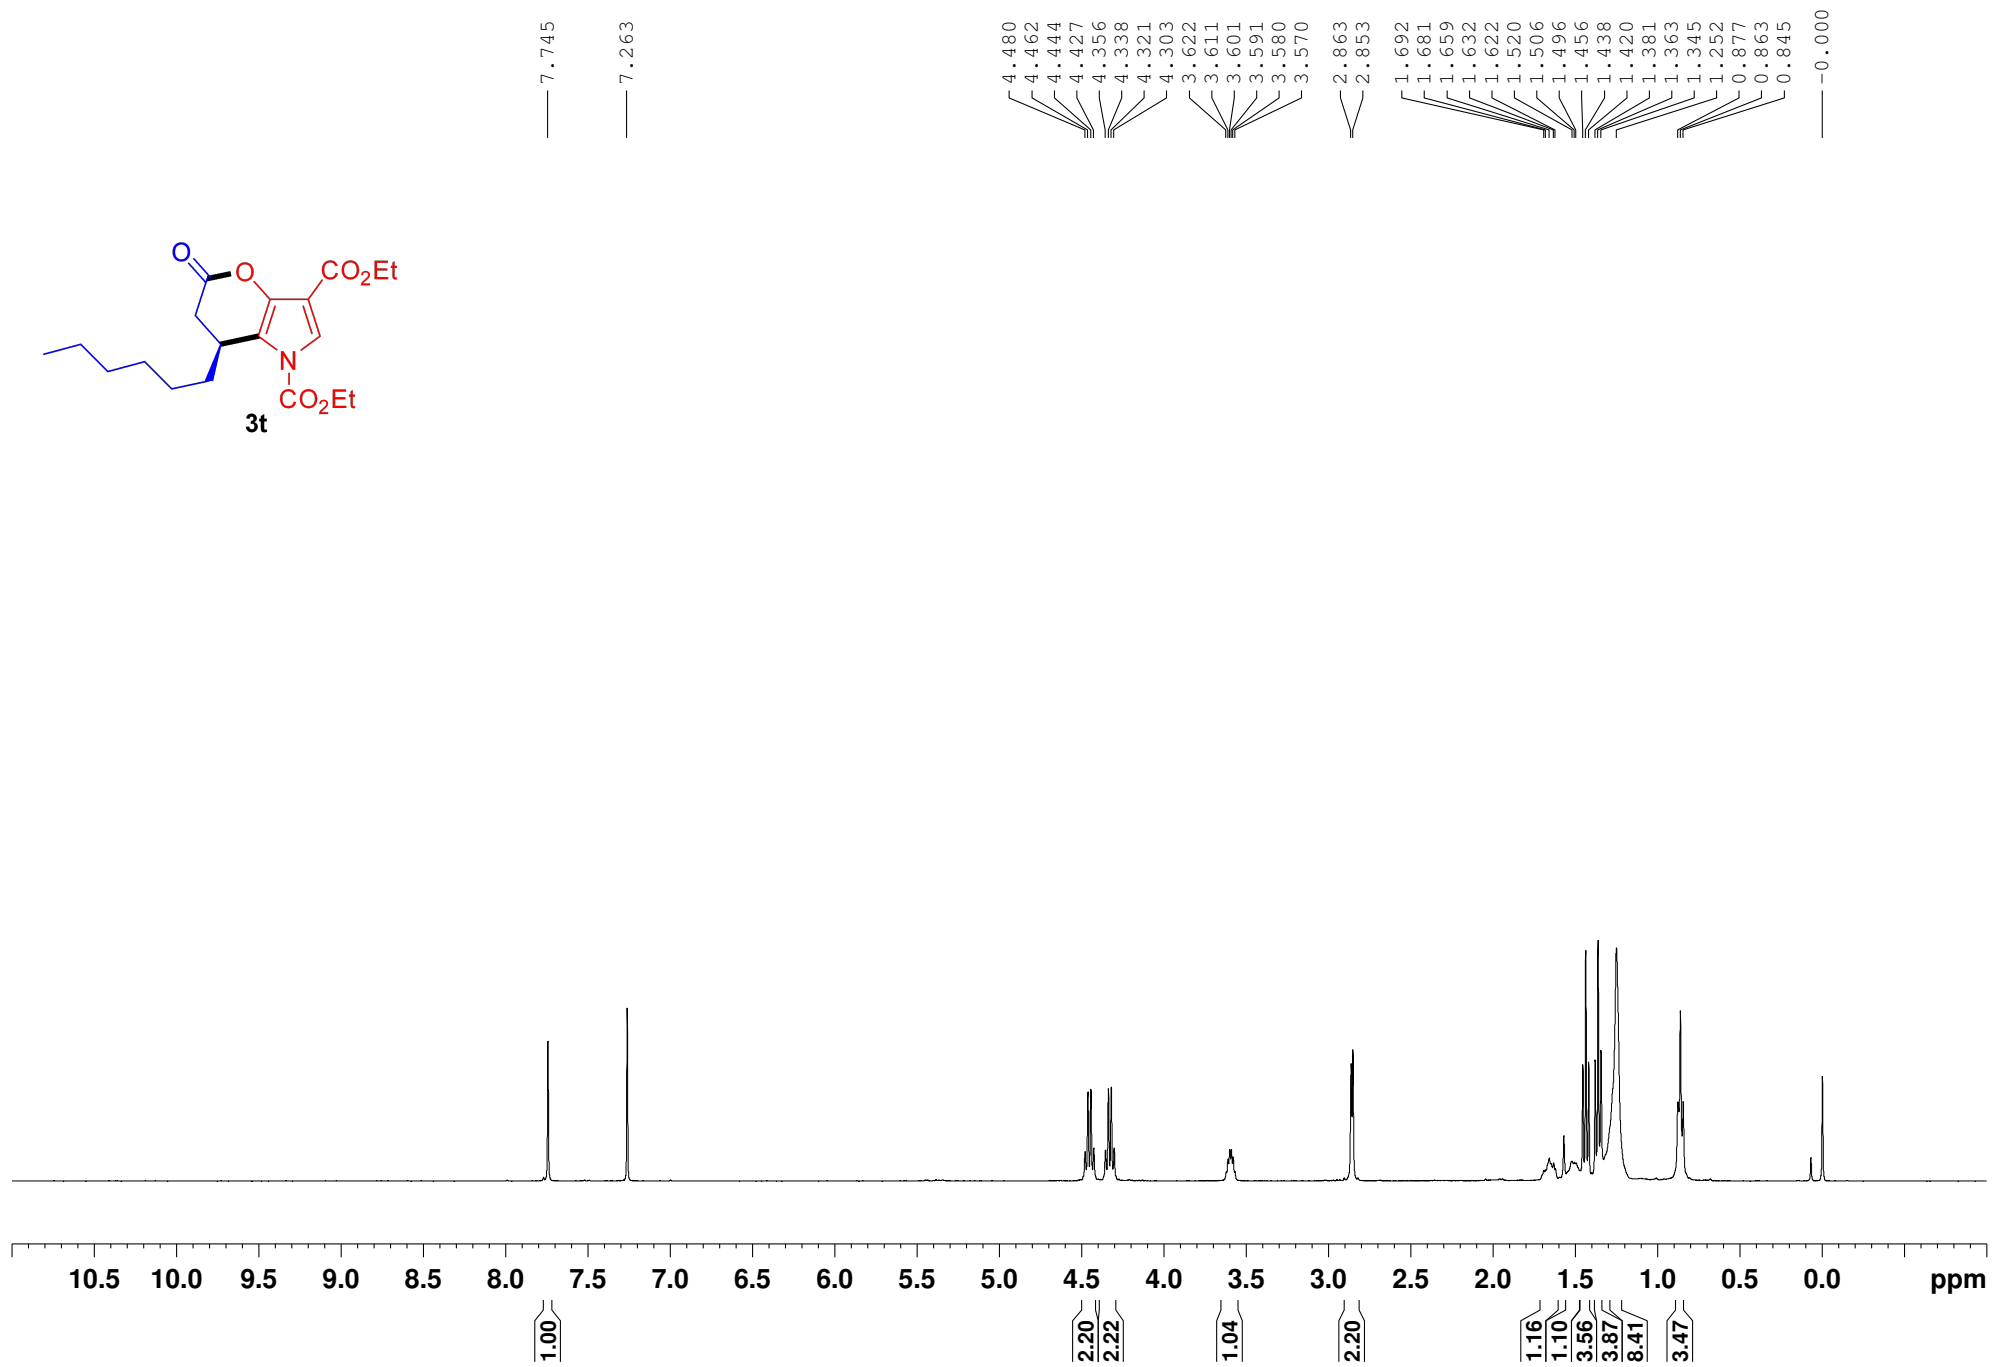

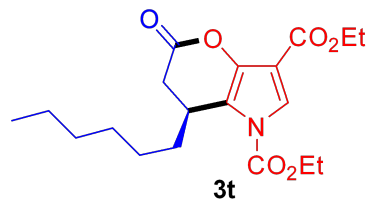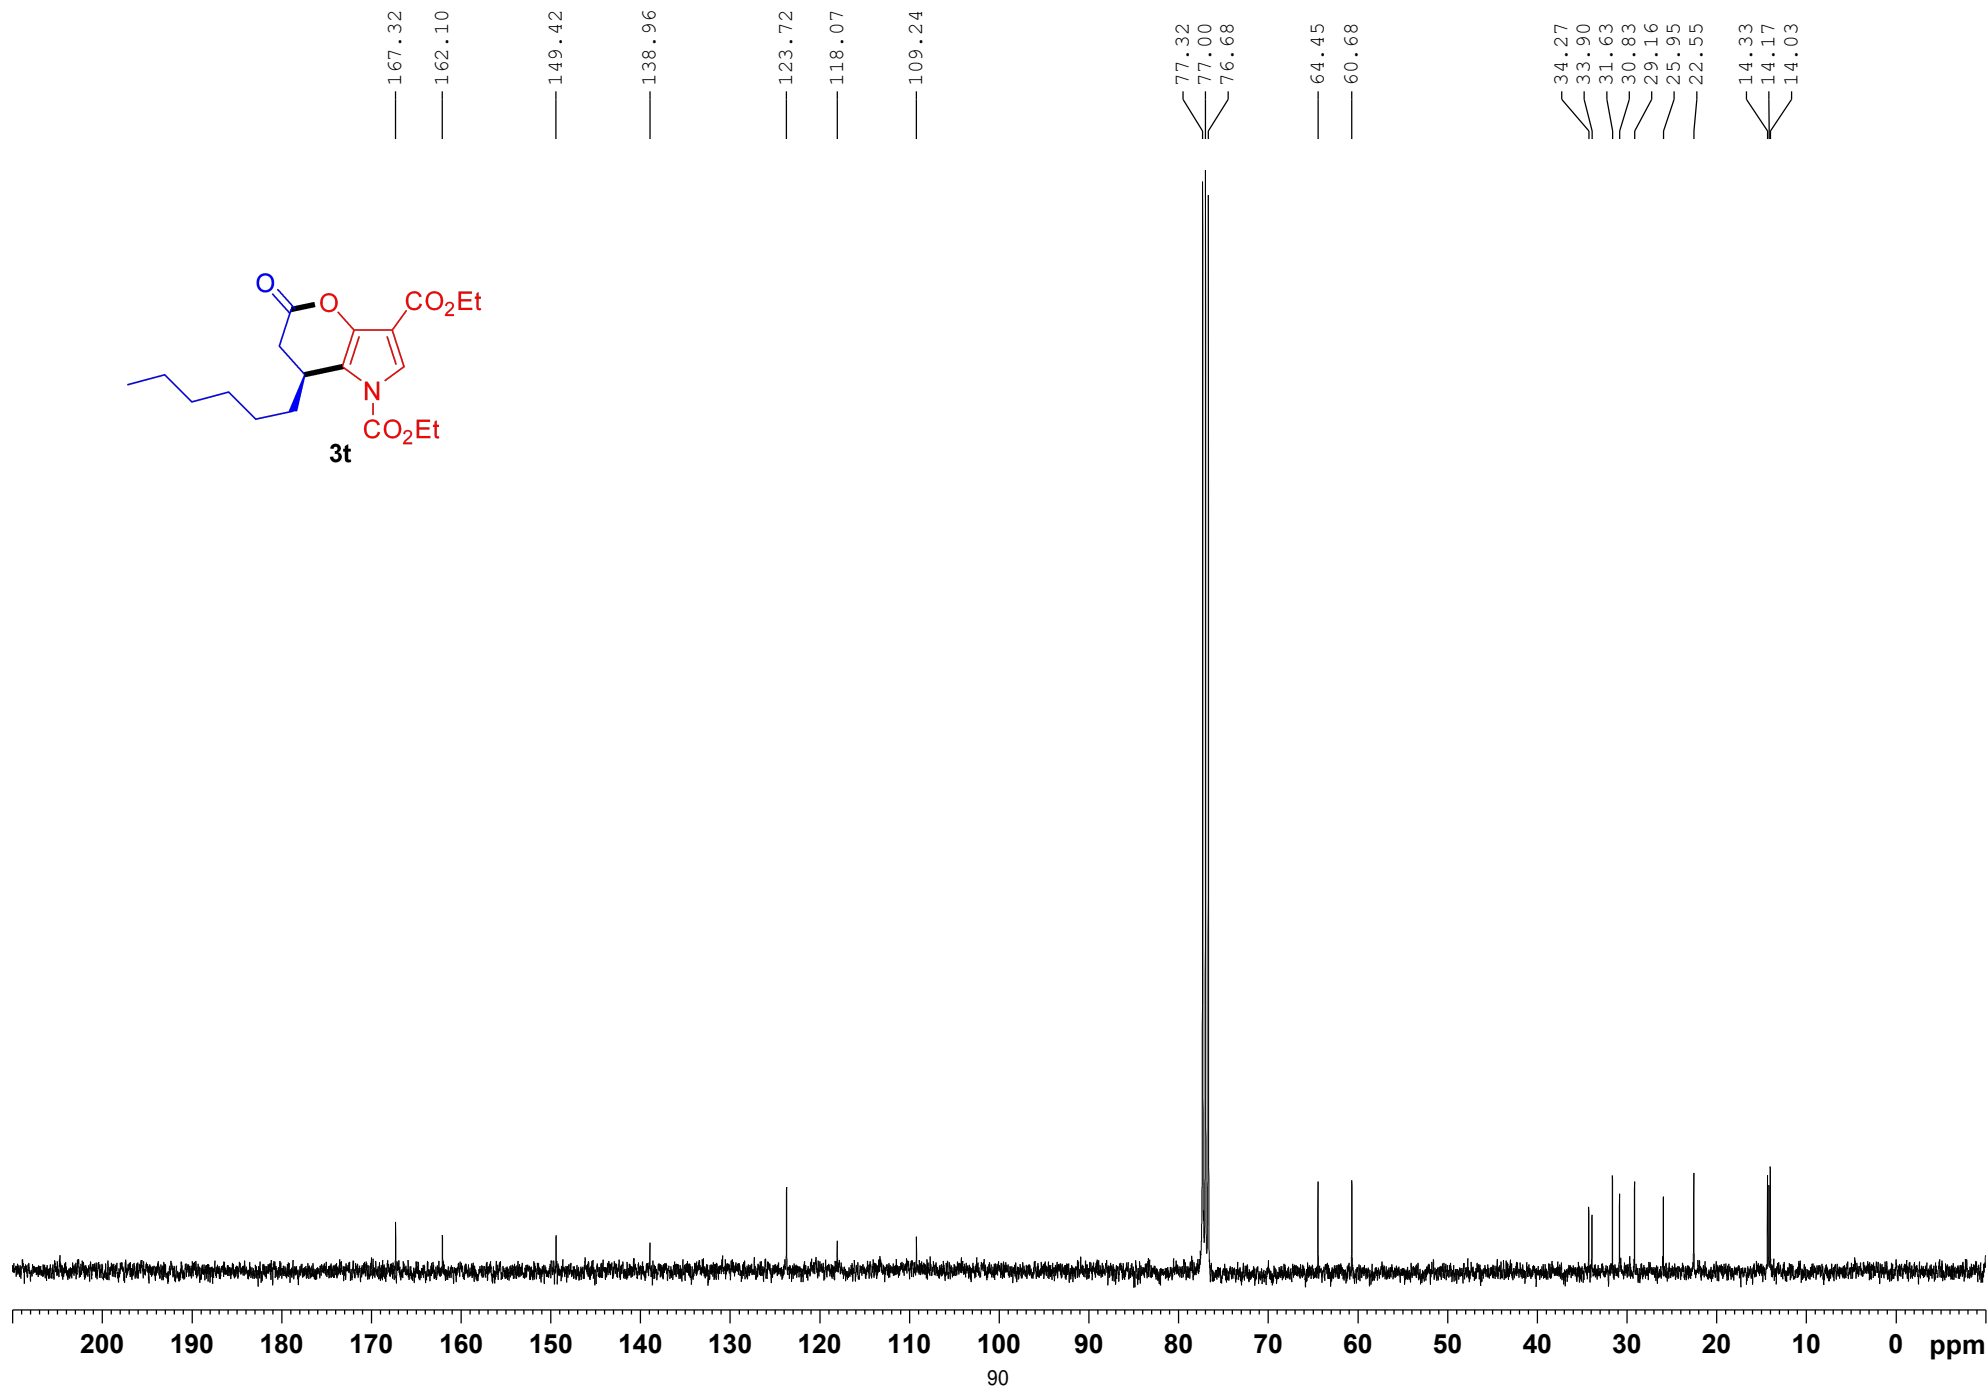

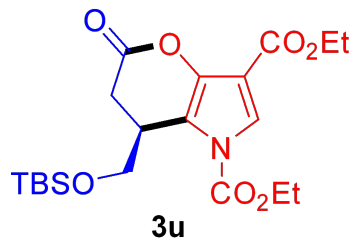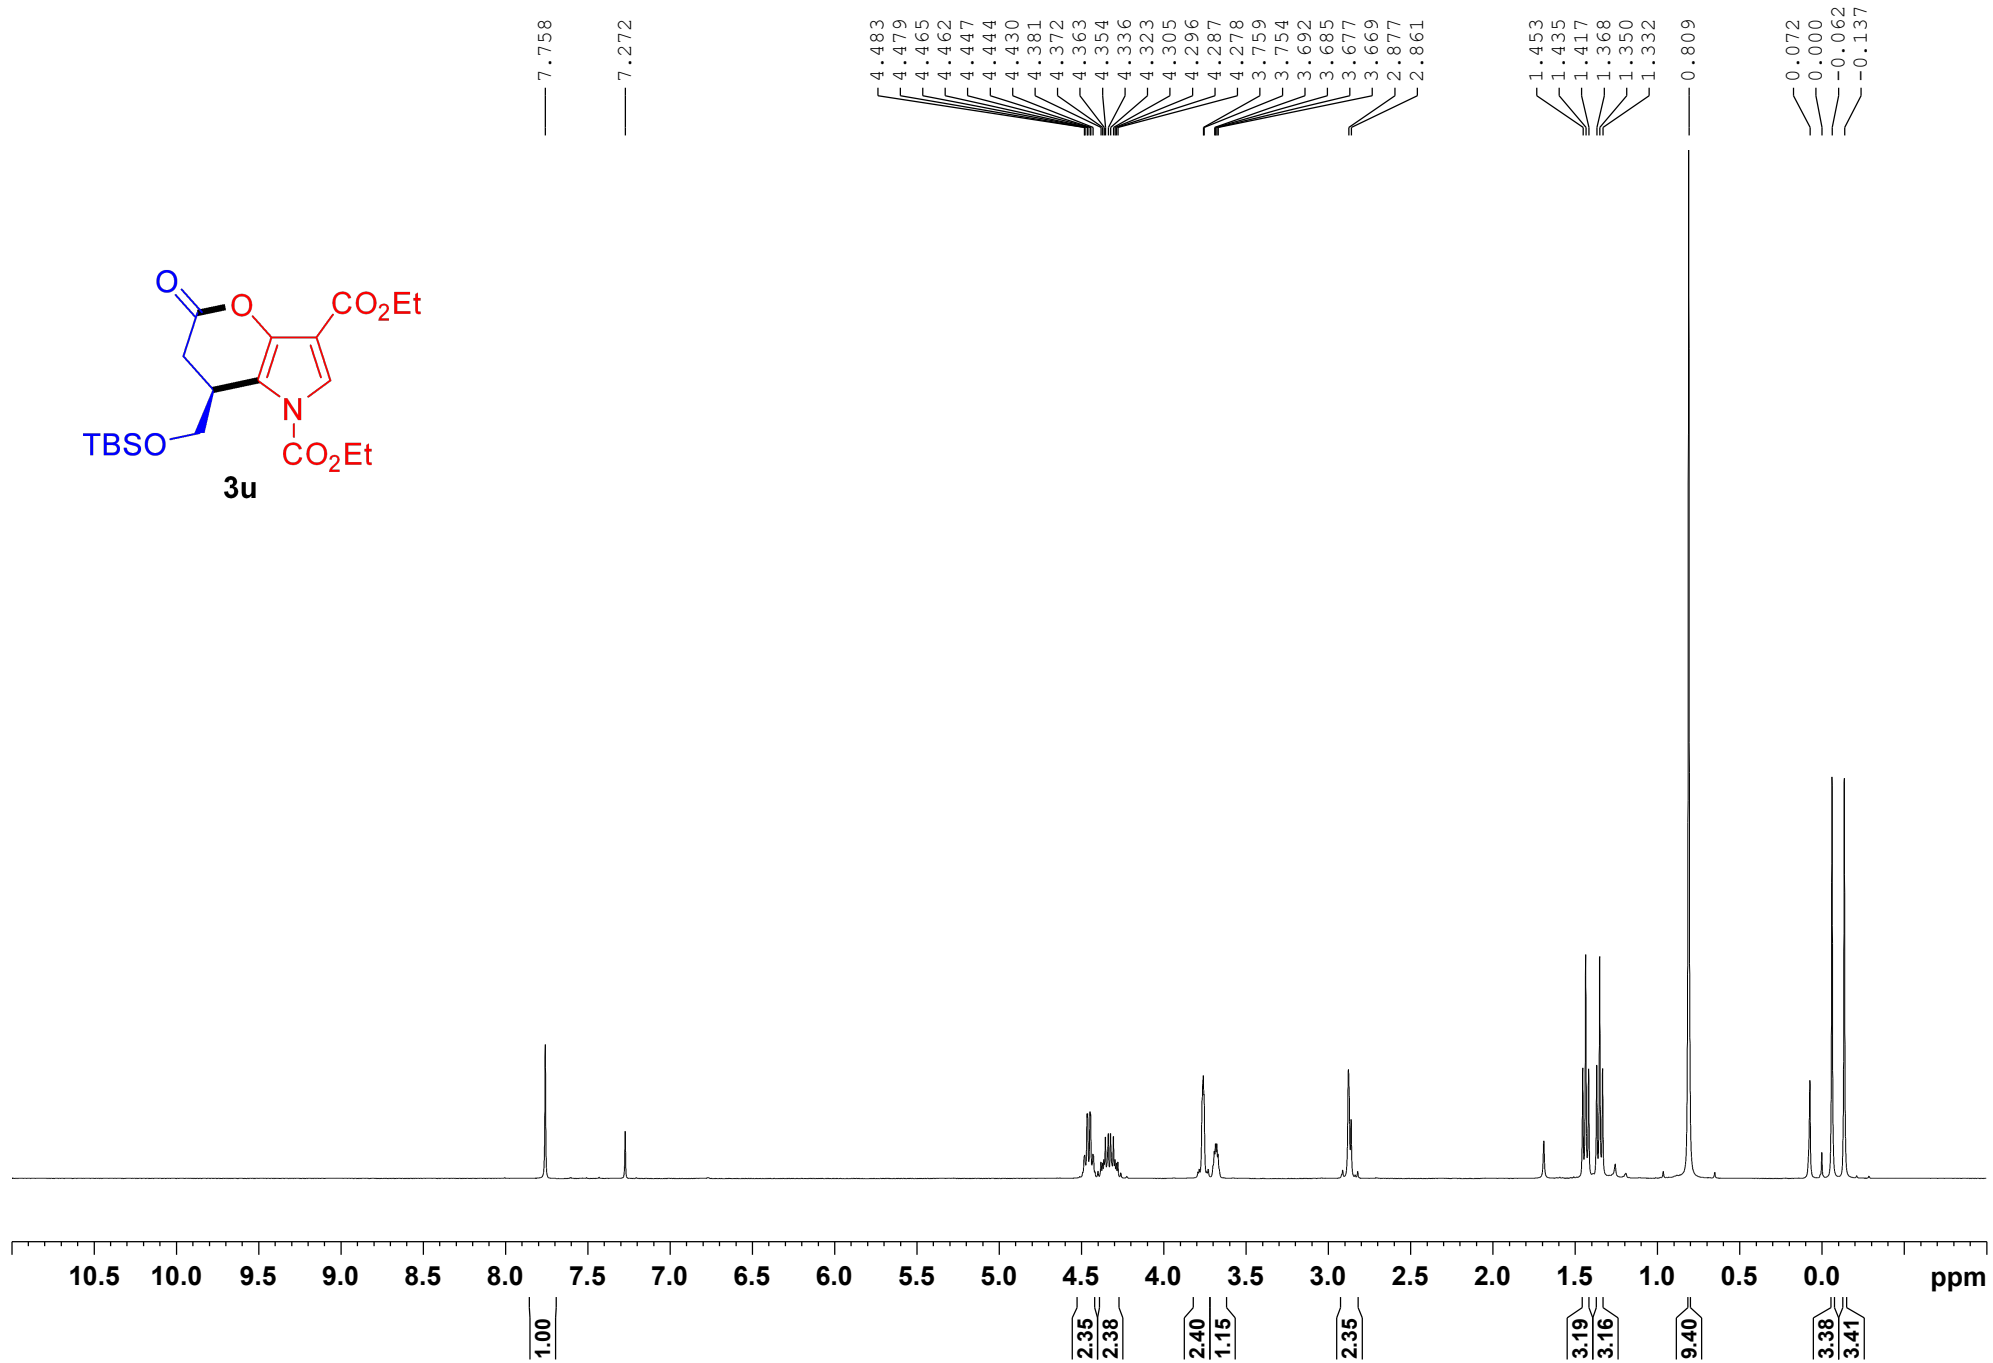

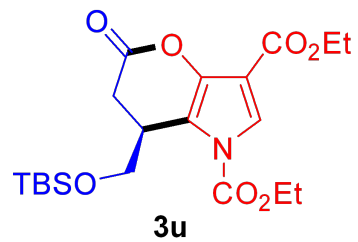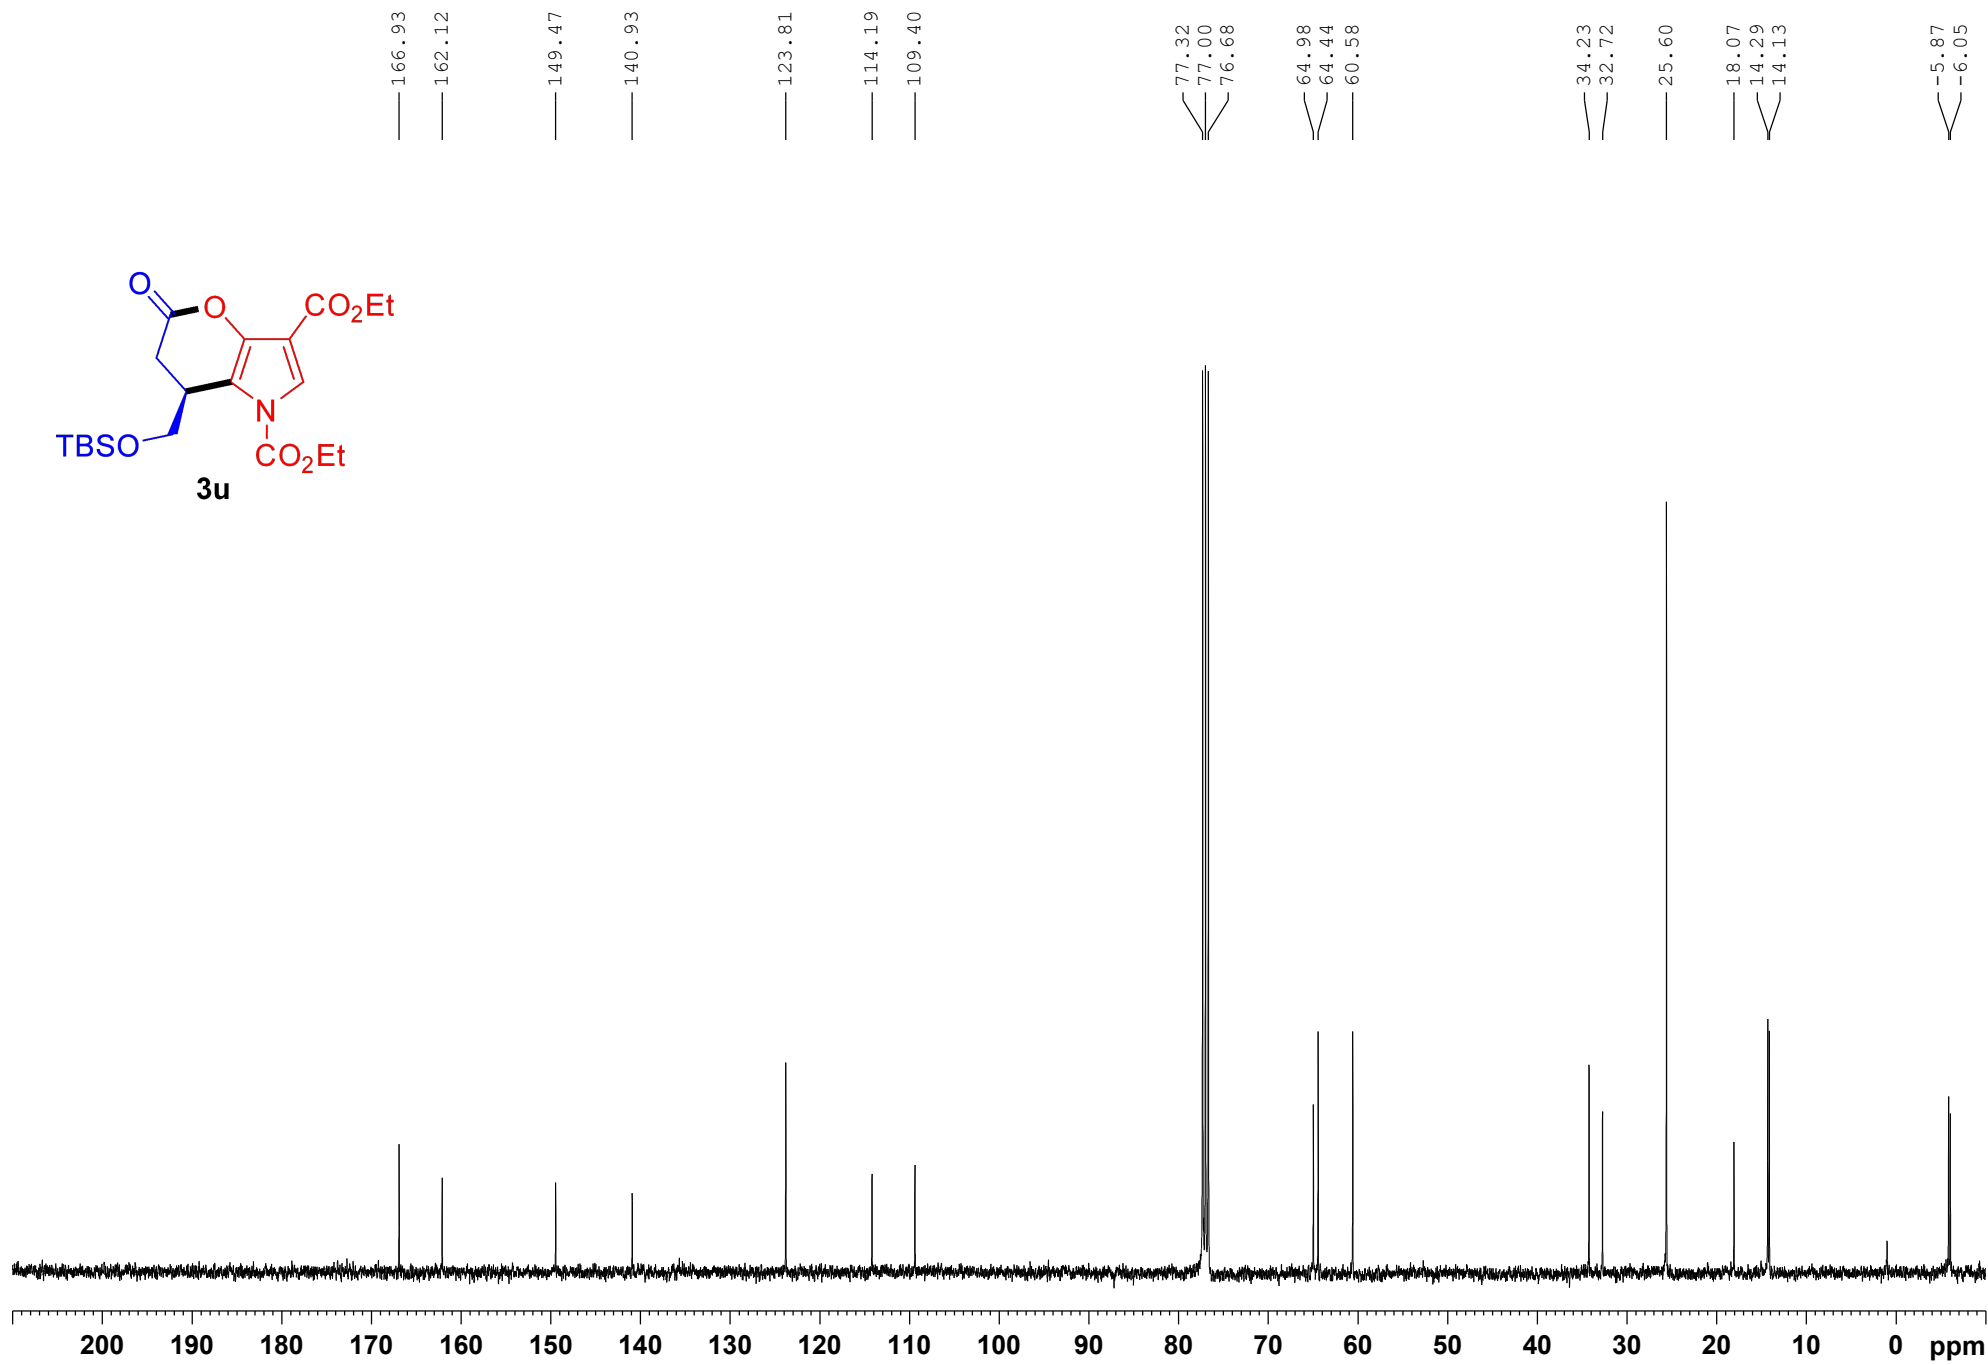

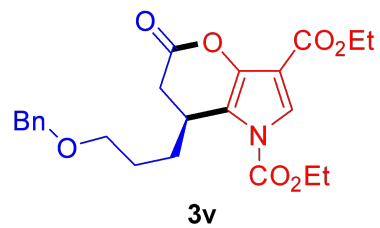

7.740  
7.349  
7.330  
7.312  
7.303  
7.286  
7.263

4.460  
4.437  
4.434  
4.420  
4.417  
4.402  
4.354  
4.336  
4.318  
4.300  
3.661  
3.654  
3.647  
3.457  
3.443  
3.429  
2.882  
2.867  
1.794  
1.788  
1.776  
1.766  
1.756  
1.720  
1.695  
1.688  
1.675  
1.668  
1.653  
1.636  
1.623  
1.613  
1.432  
1.414  
1.397  
1.378  
1.361  
1.343  
0.000

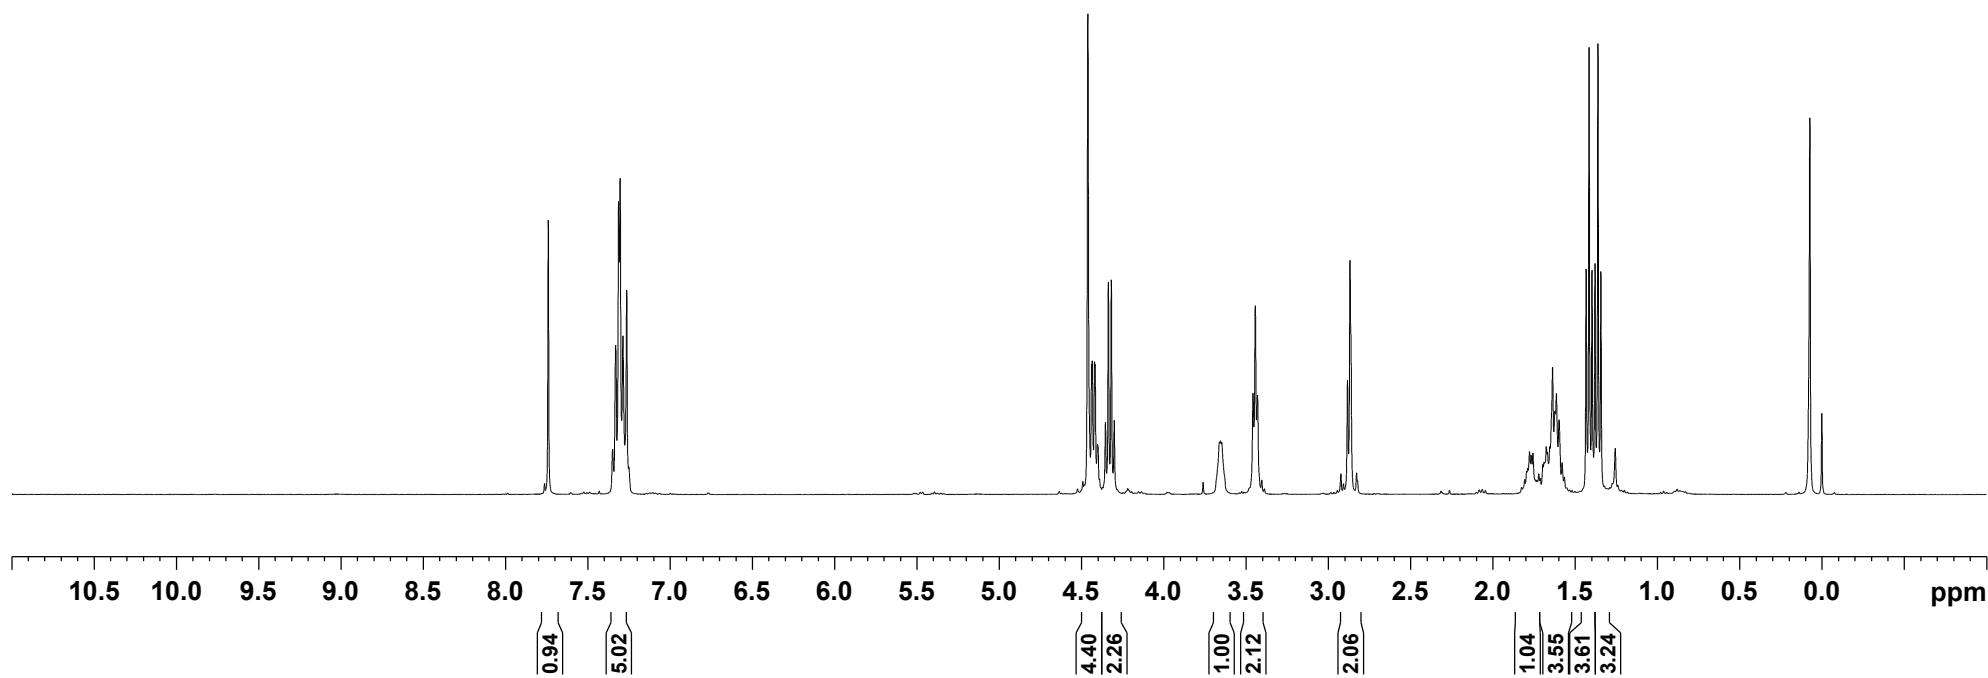

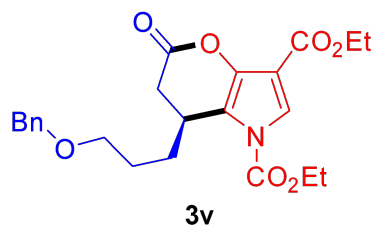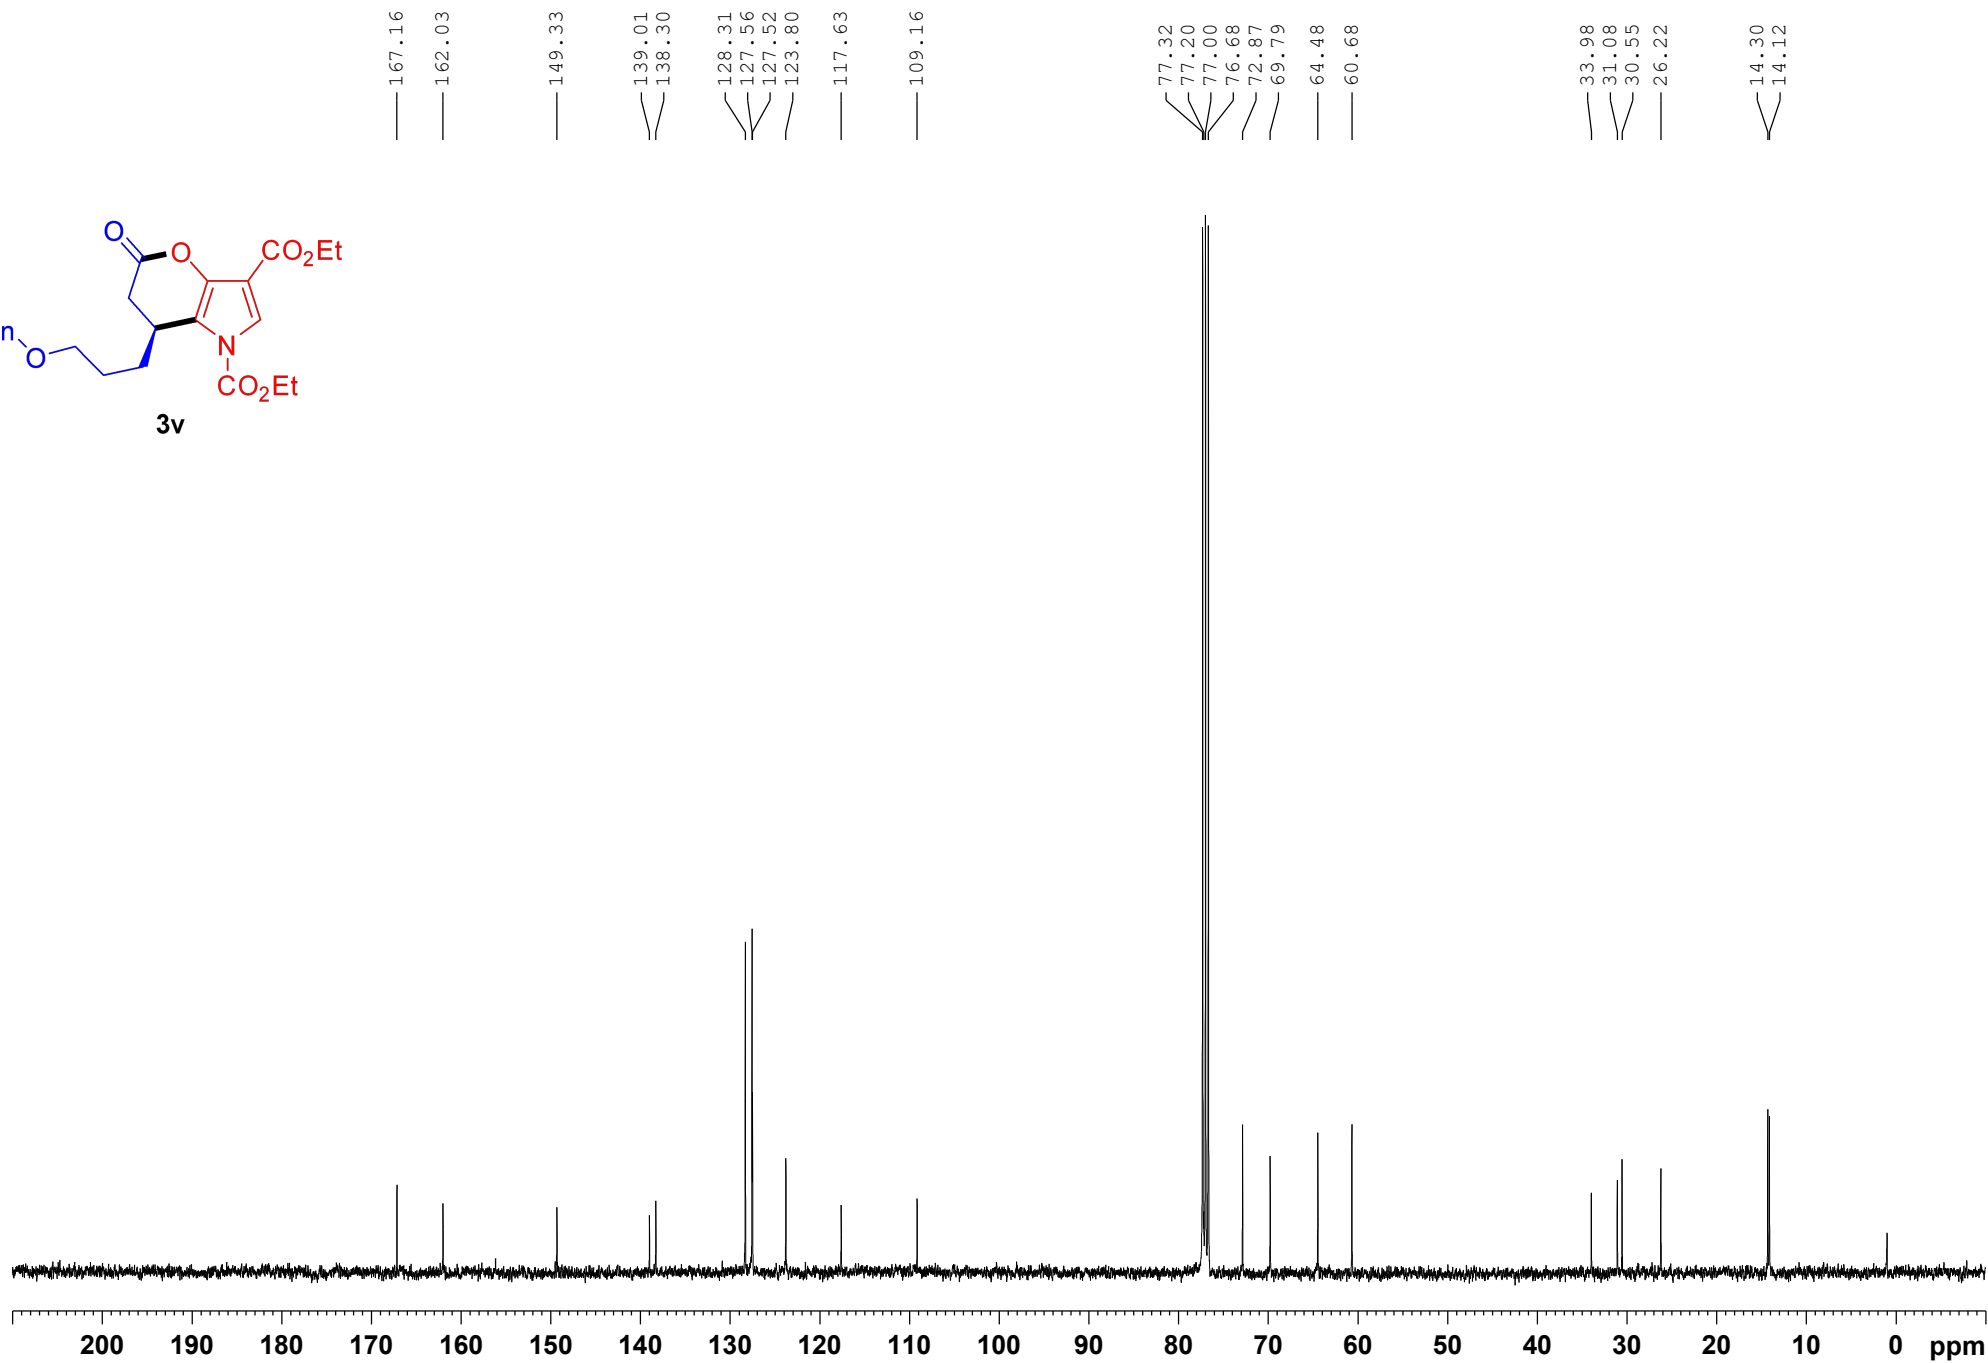

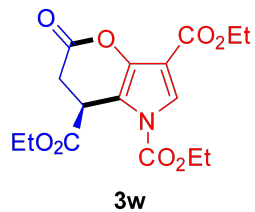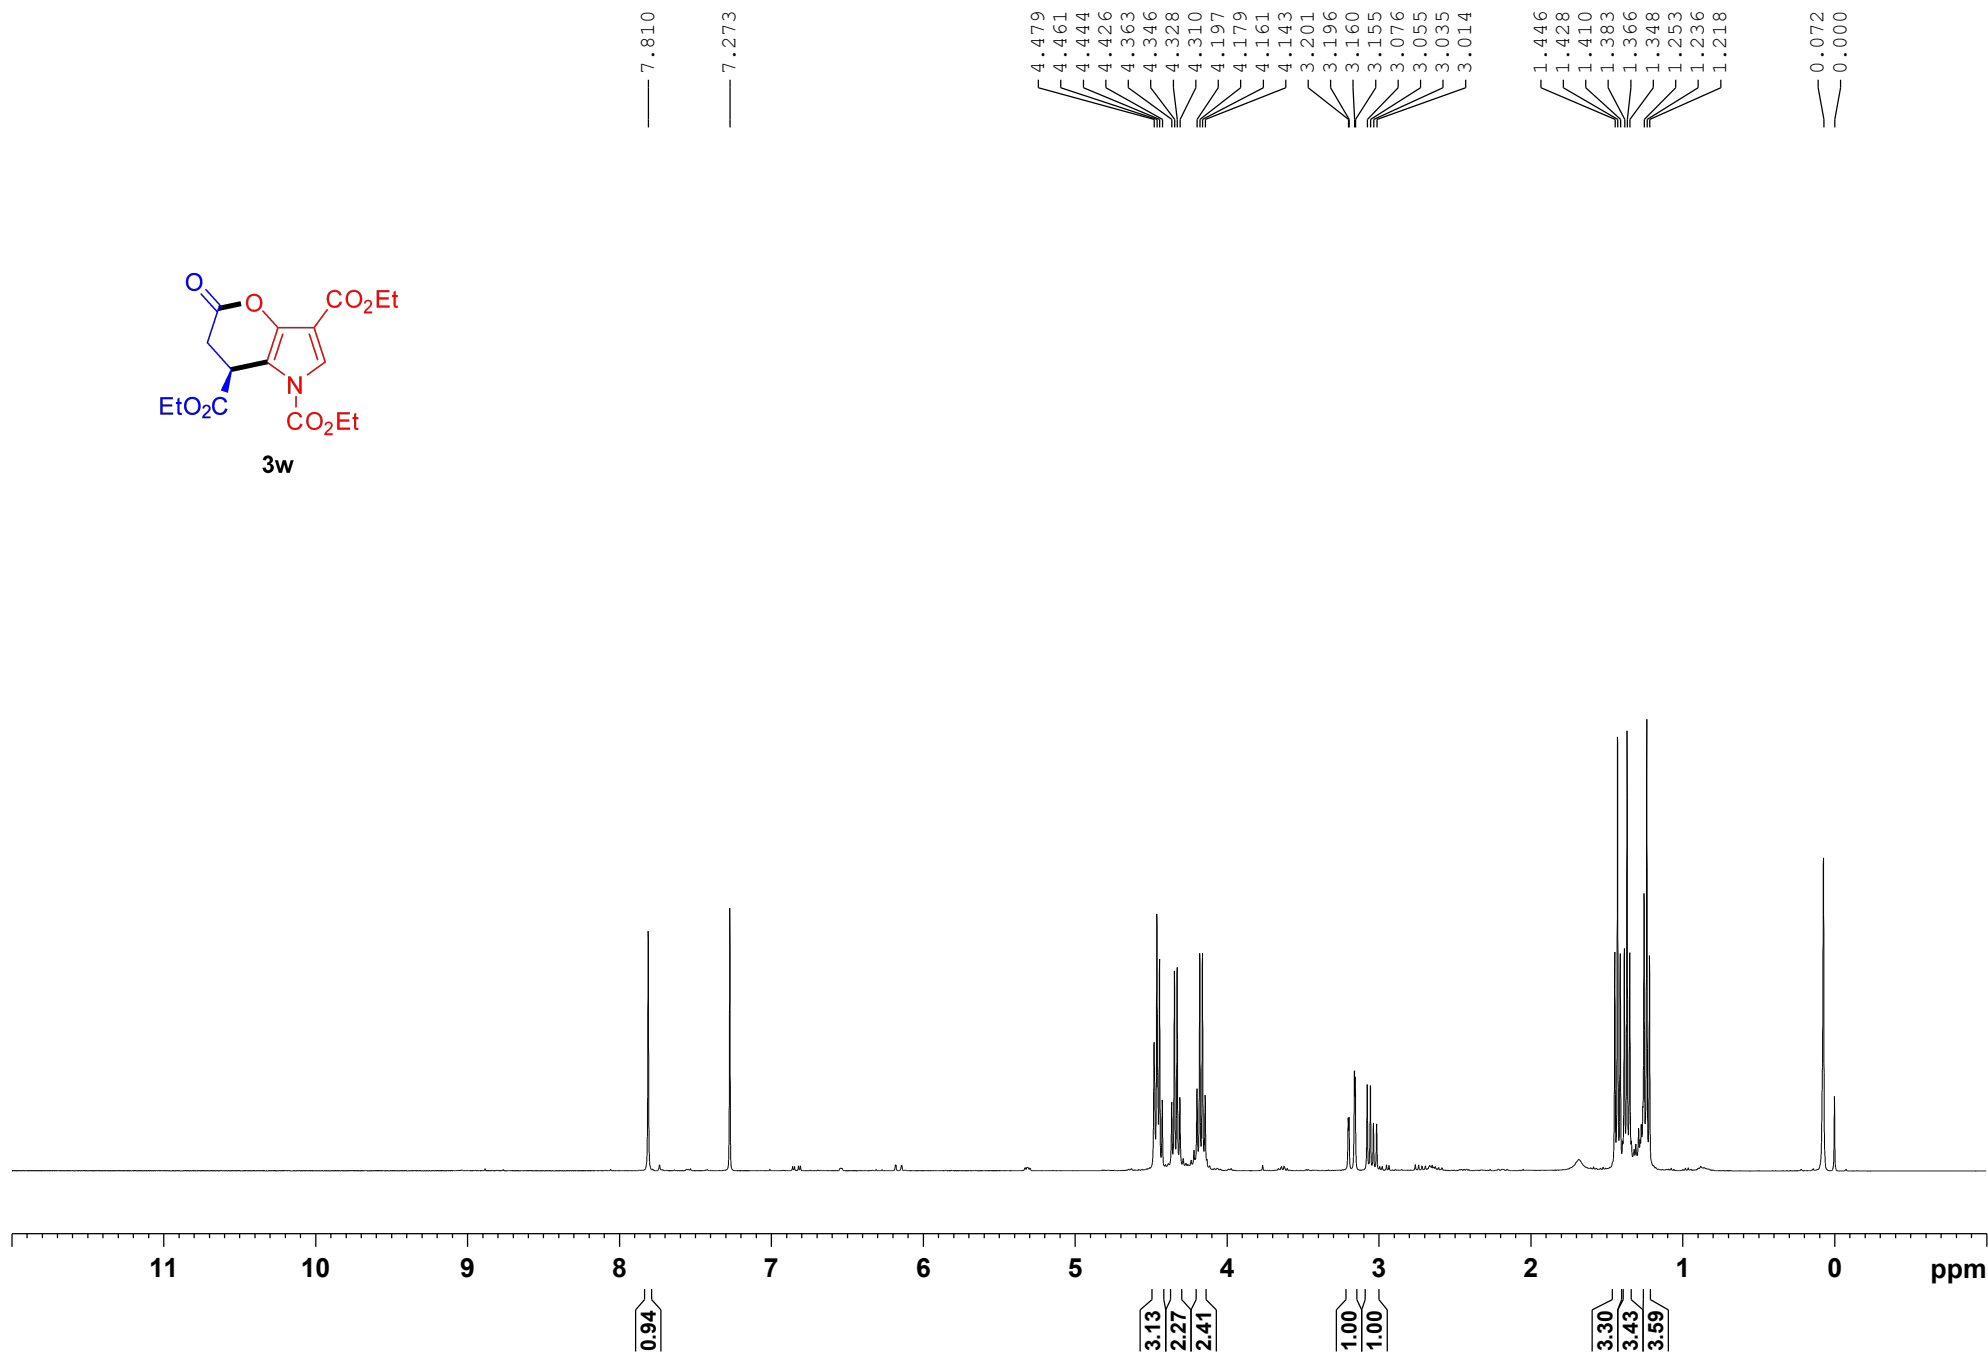

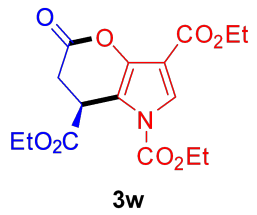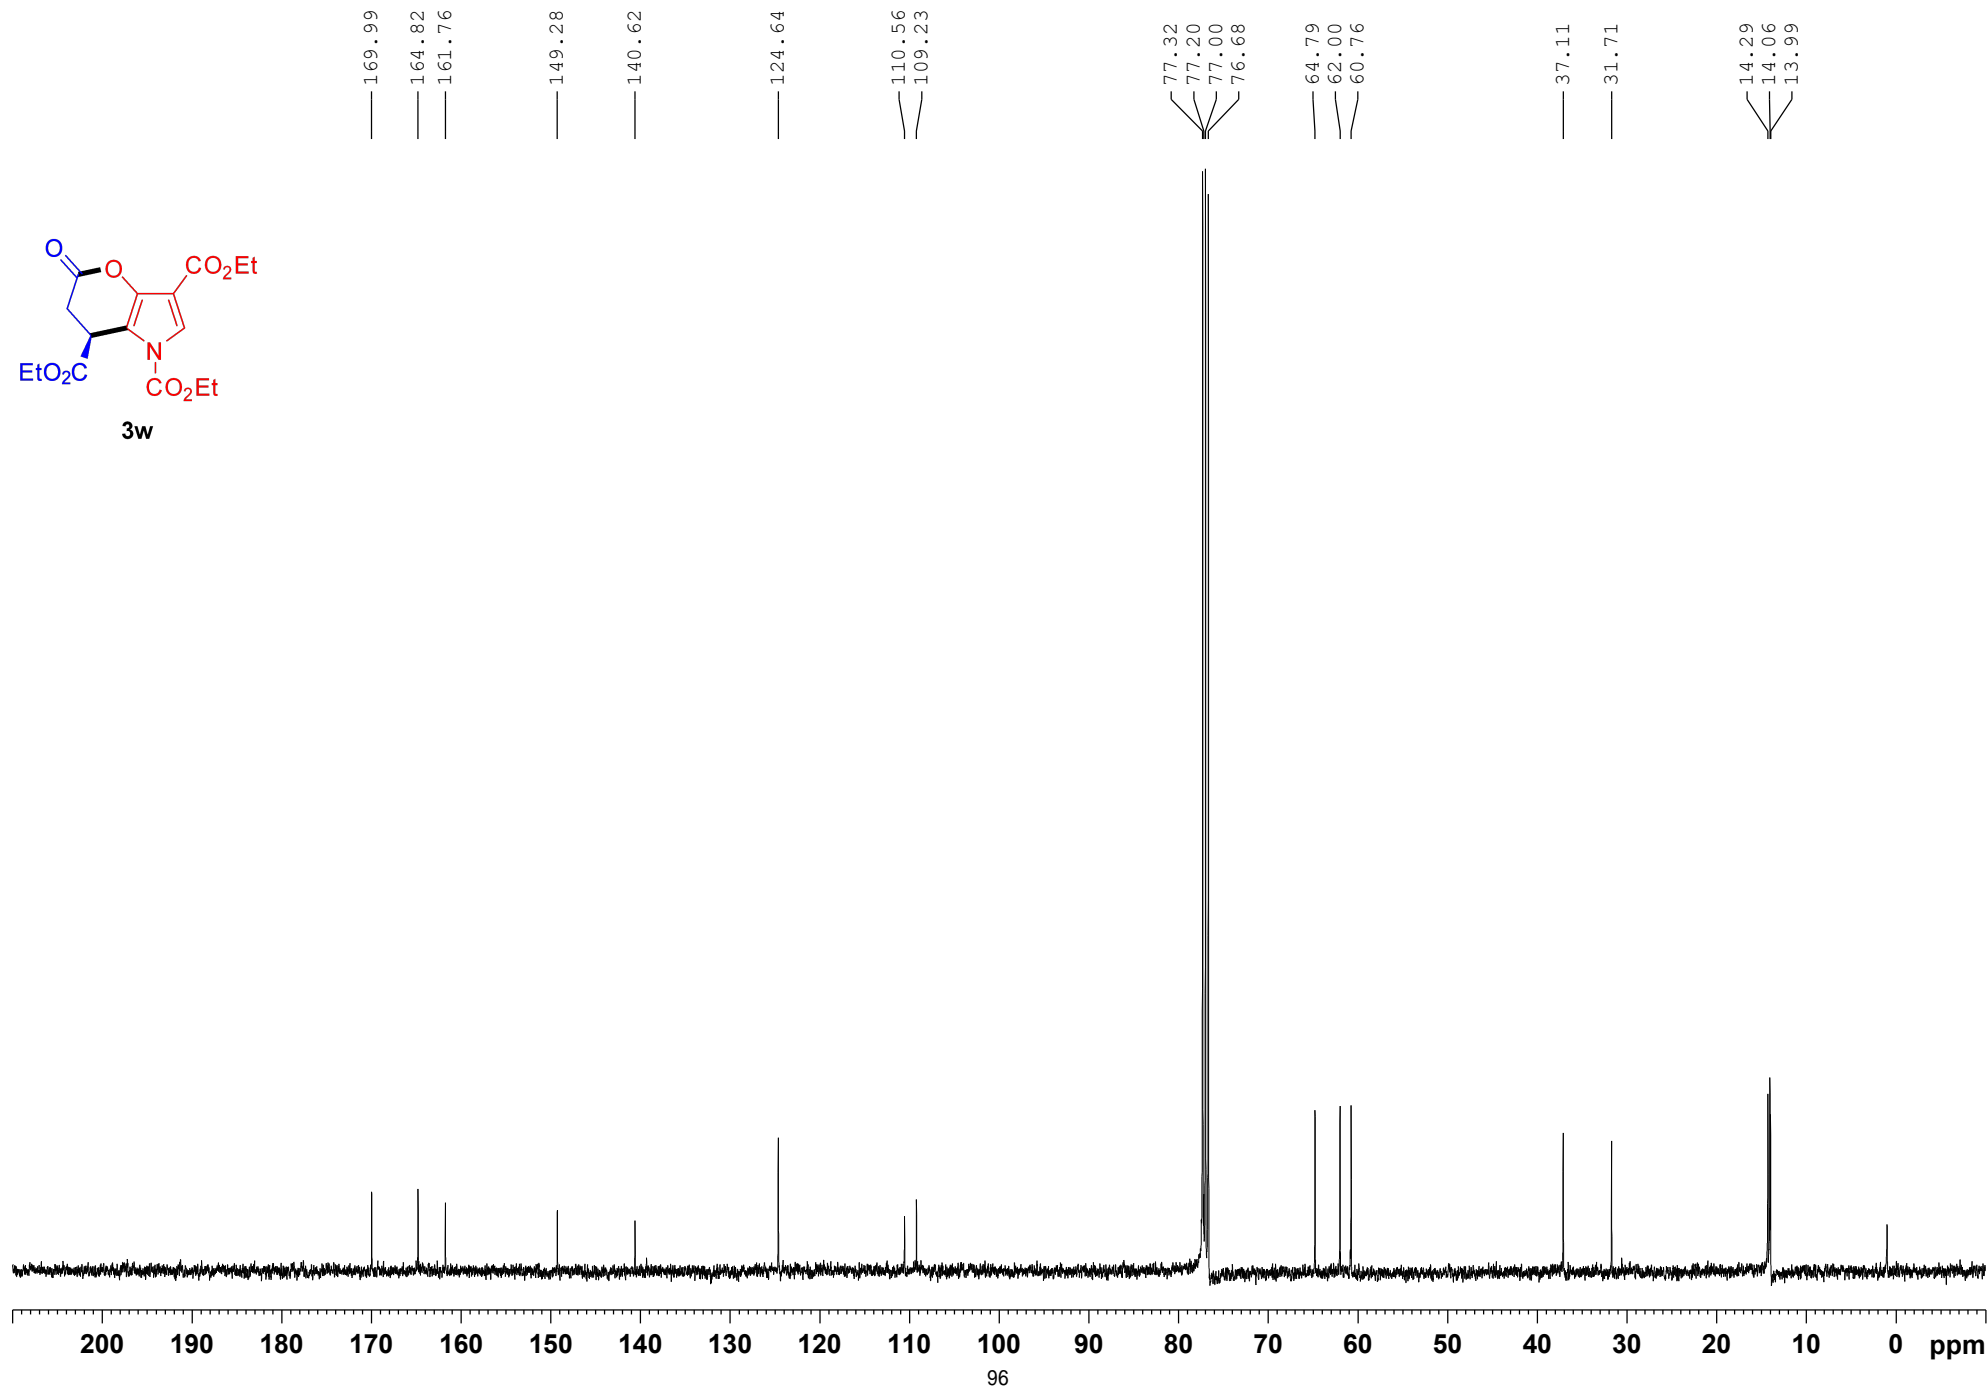



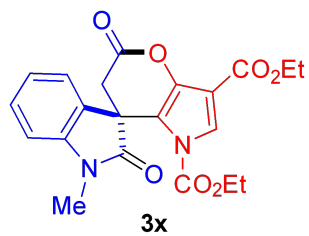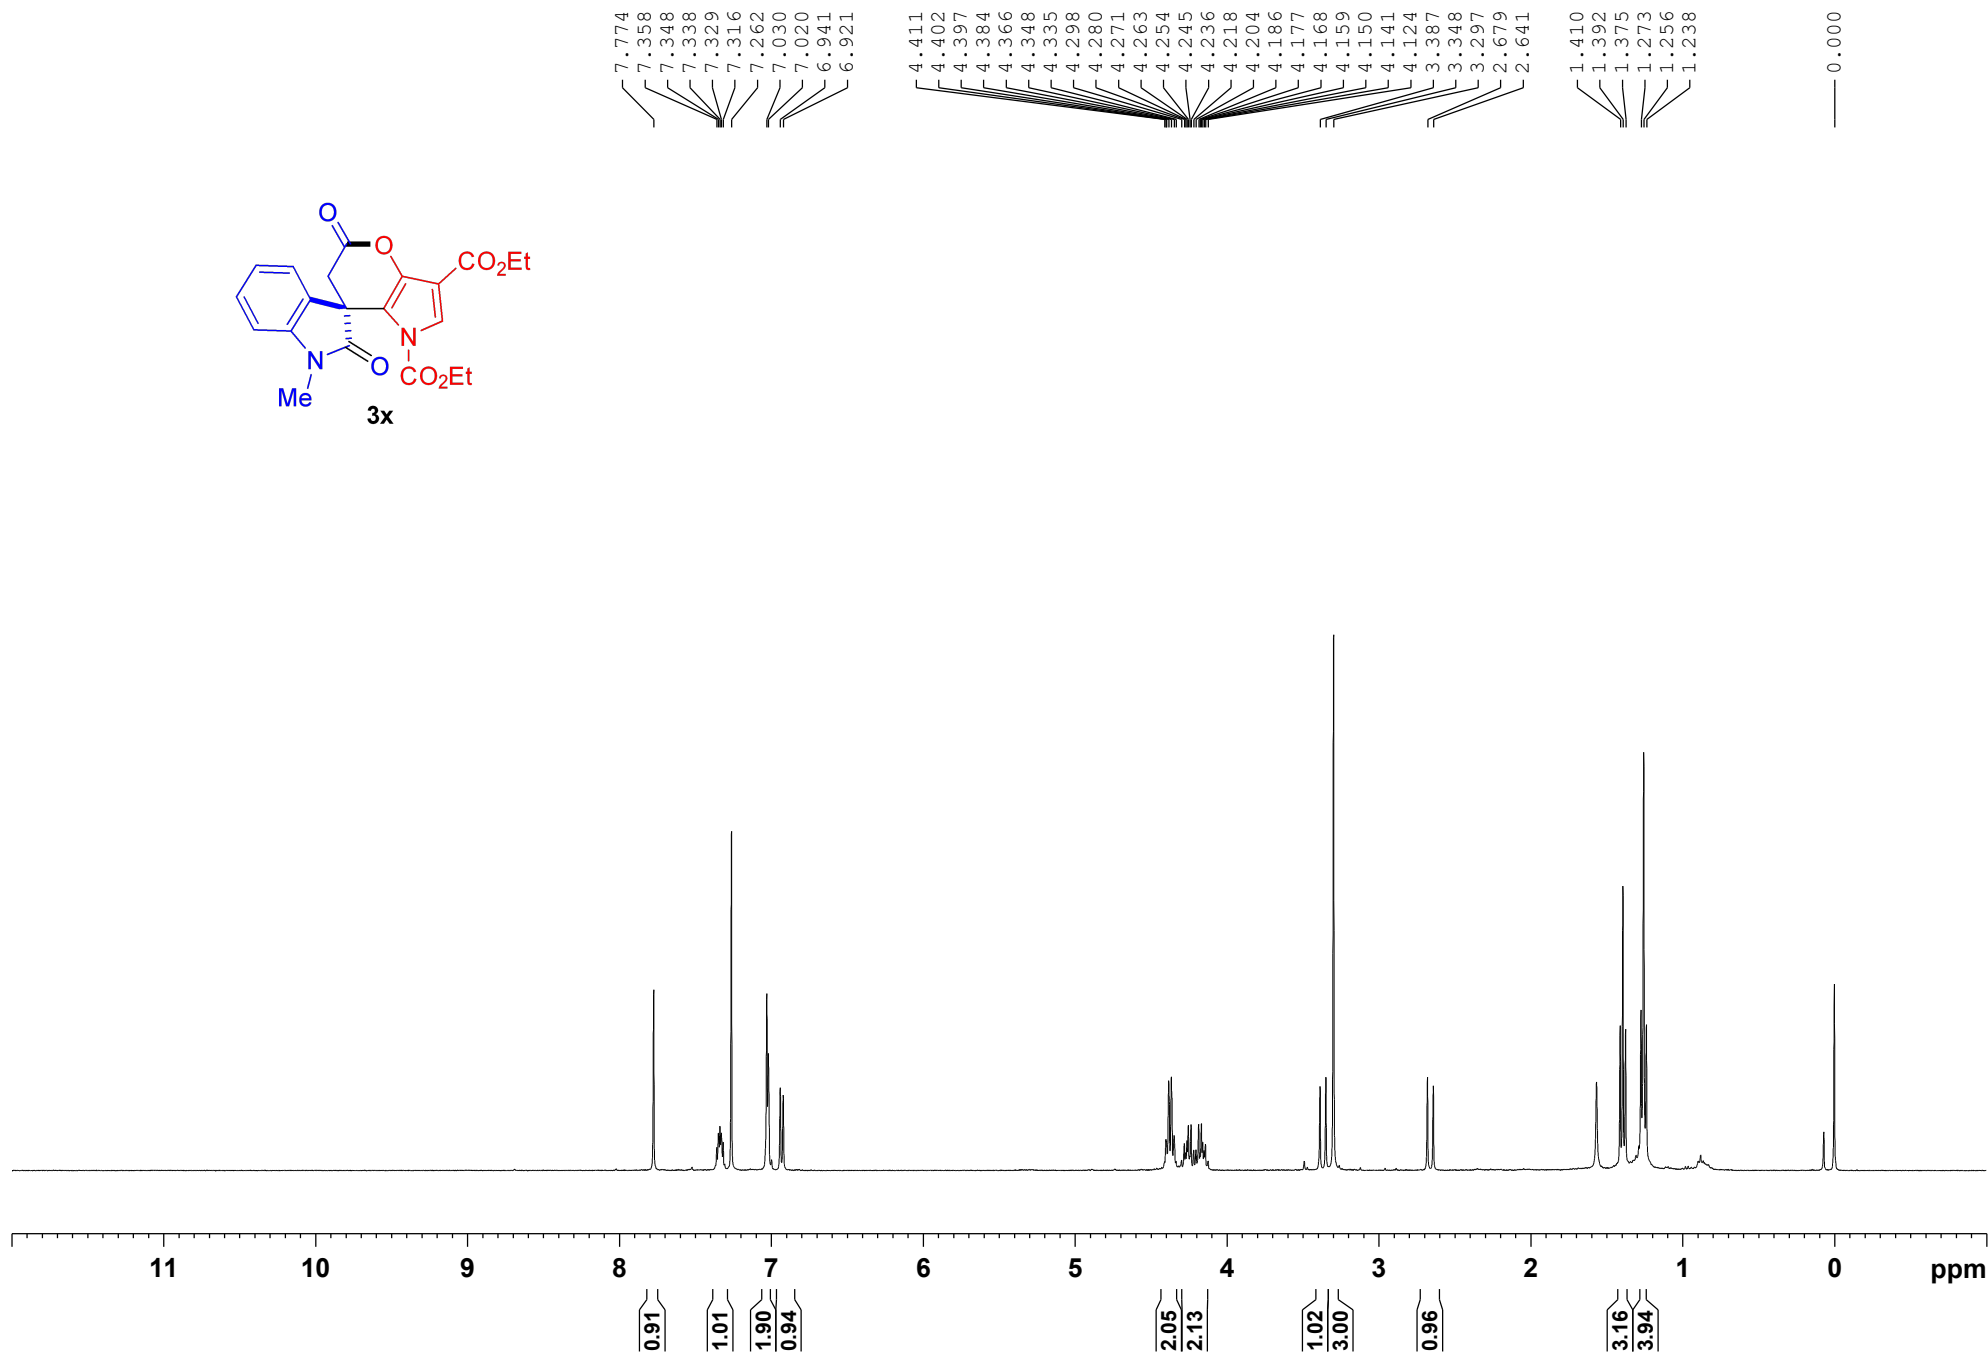

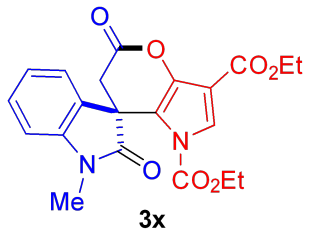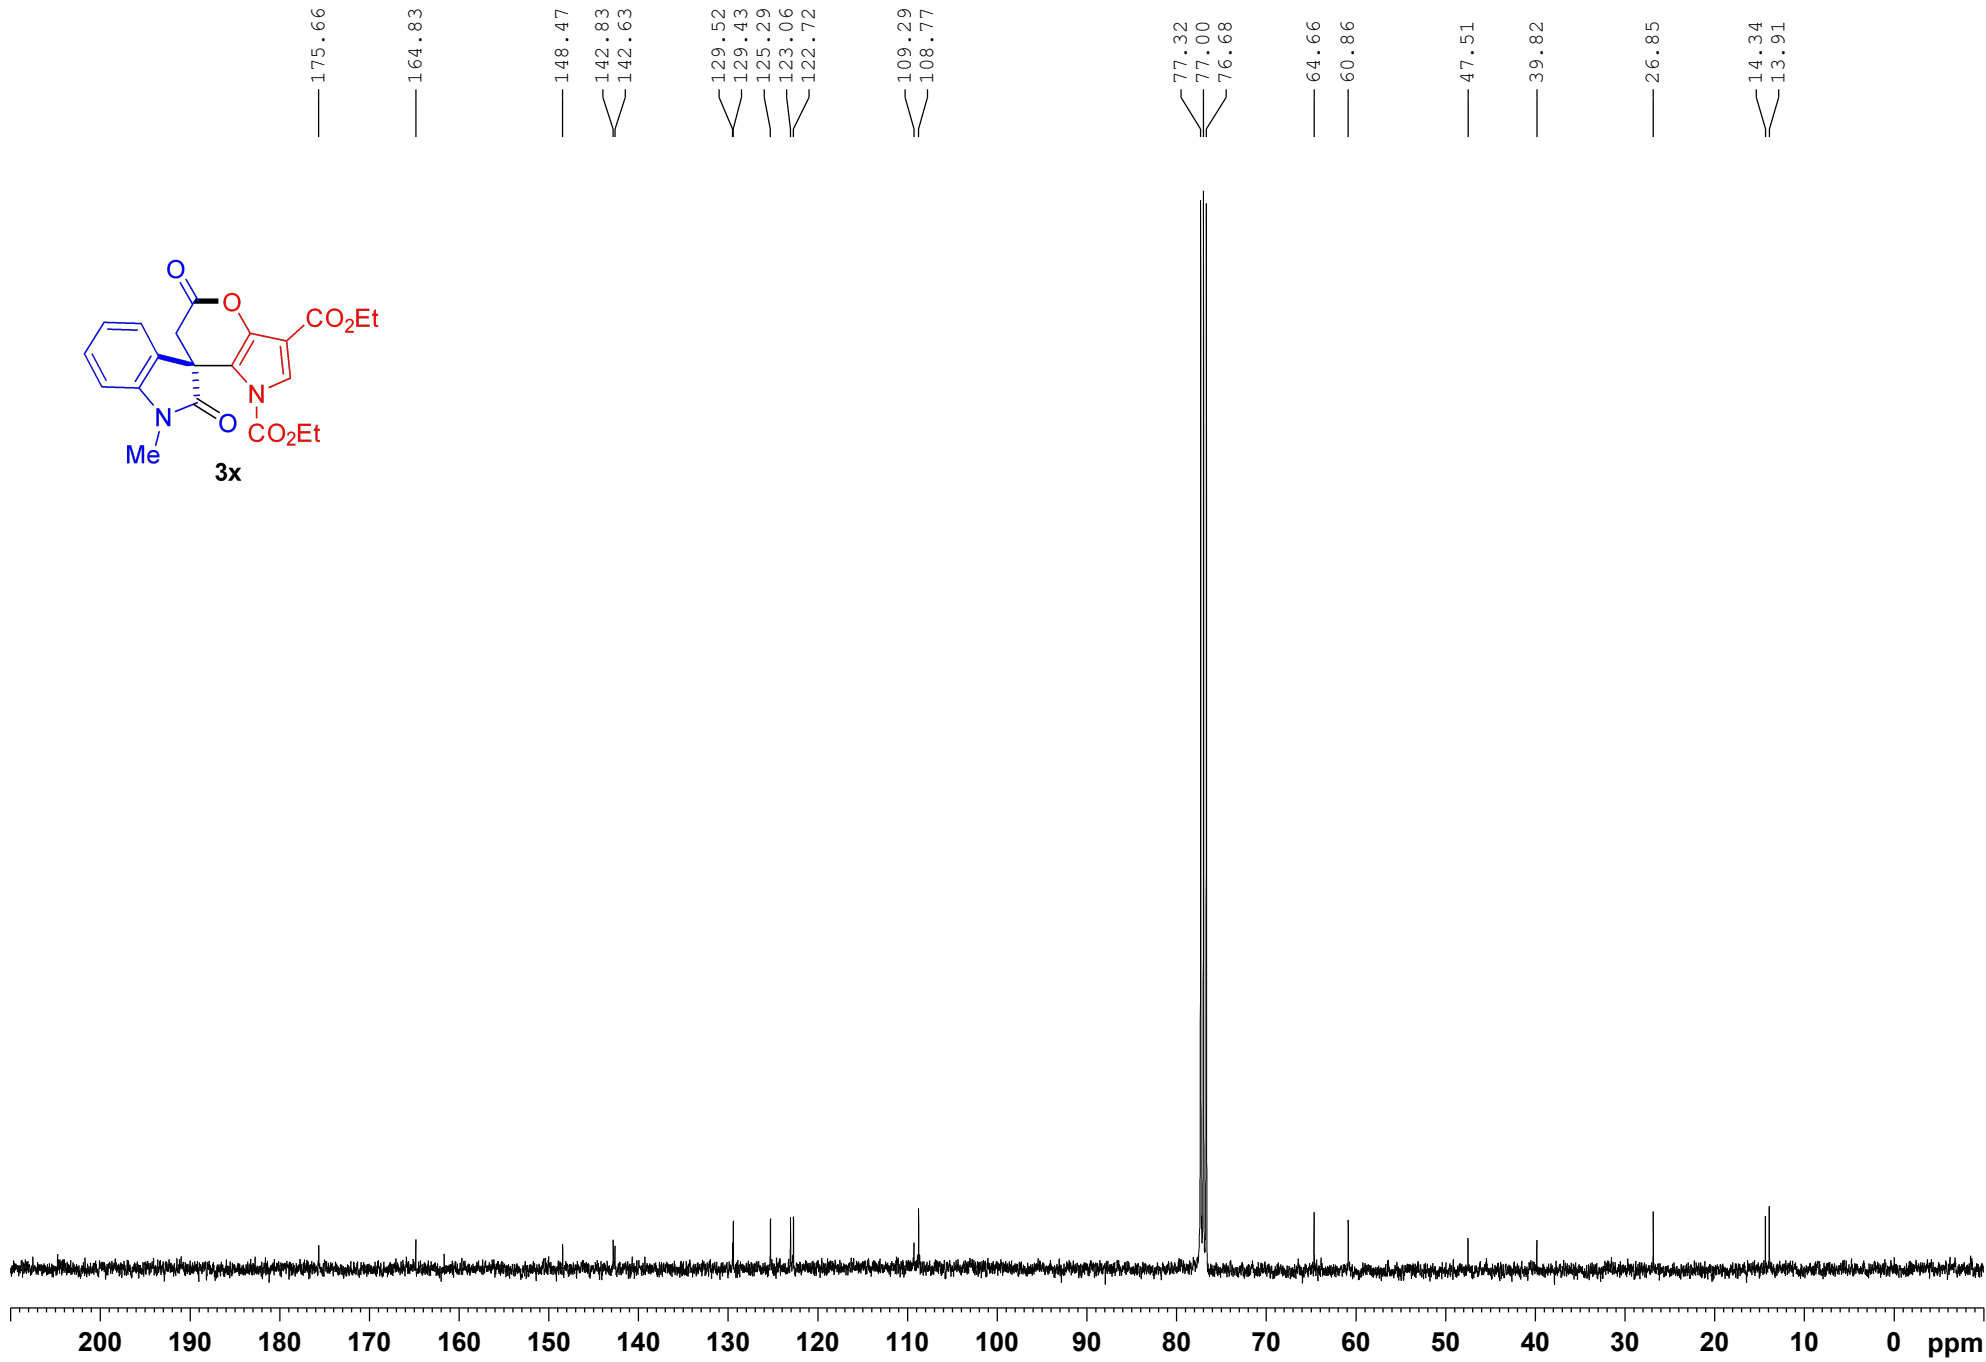

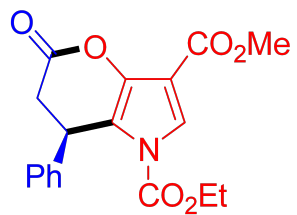

3y

7.848  
7.315  
7.298  
7.279  
7.264  
7.247  
7.241  
7.234  
7.223  
7.084  
7.081  
7.063

4.834  
4.816  
4.354  
4.345  
4.336  
4.327  
4.317  
4.310  
4.301  
4.292  
4.283  
4.274  
4.266  
3.904  
3.274  
3.254  
3.234  
3.214  
2.973  
2.969  
2.933  
2.929

1.288  
1.271  
1.253

0.000

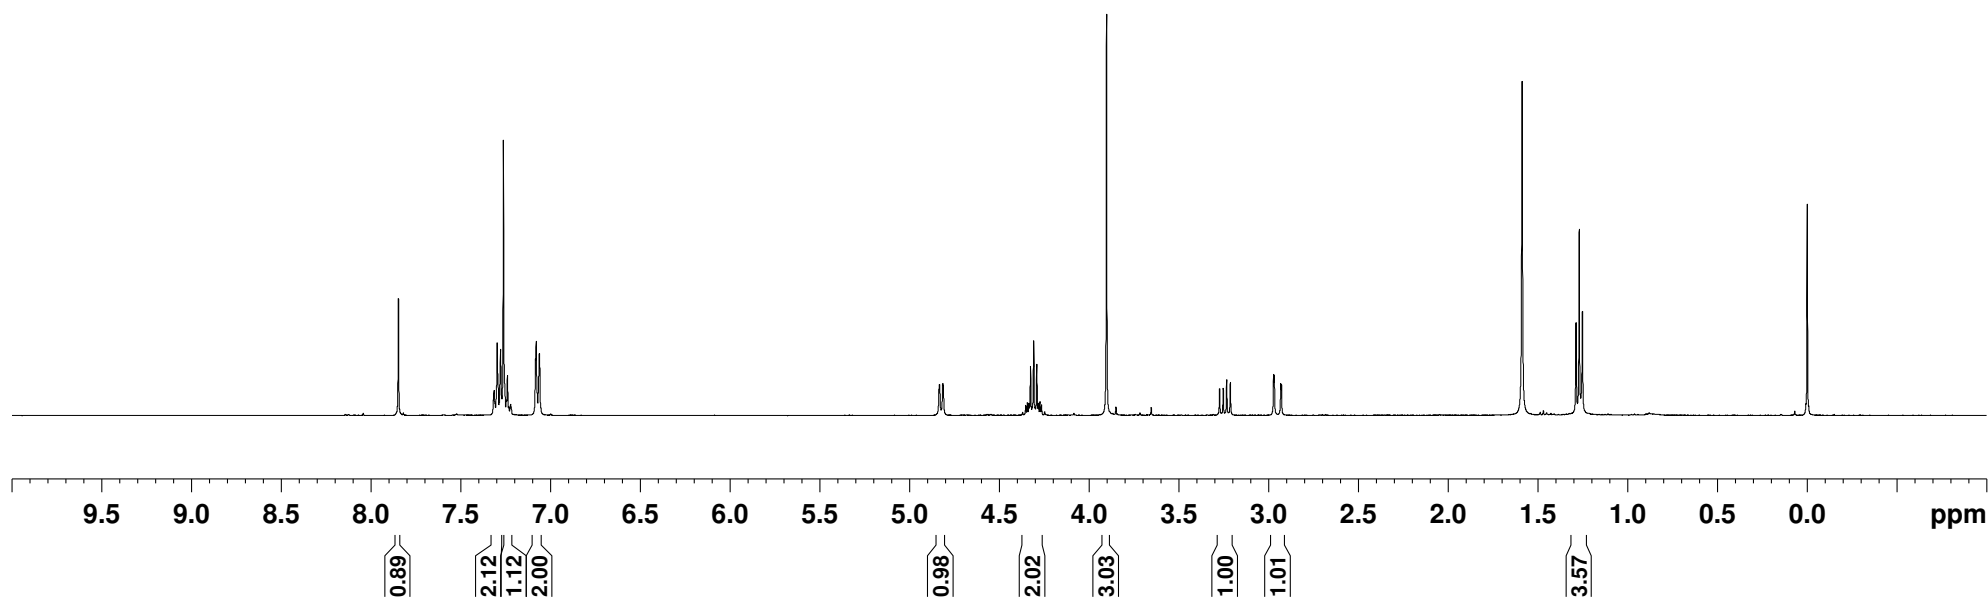

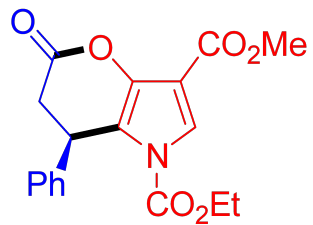

3y

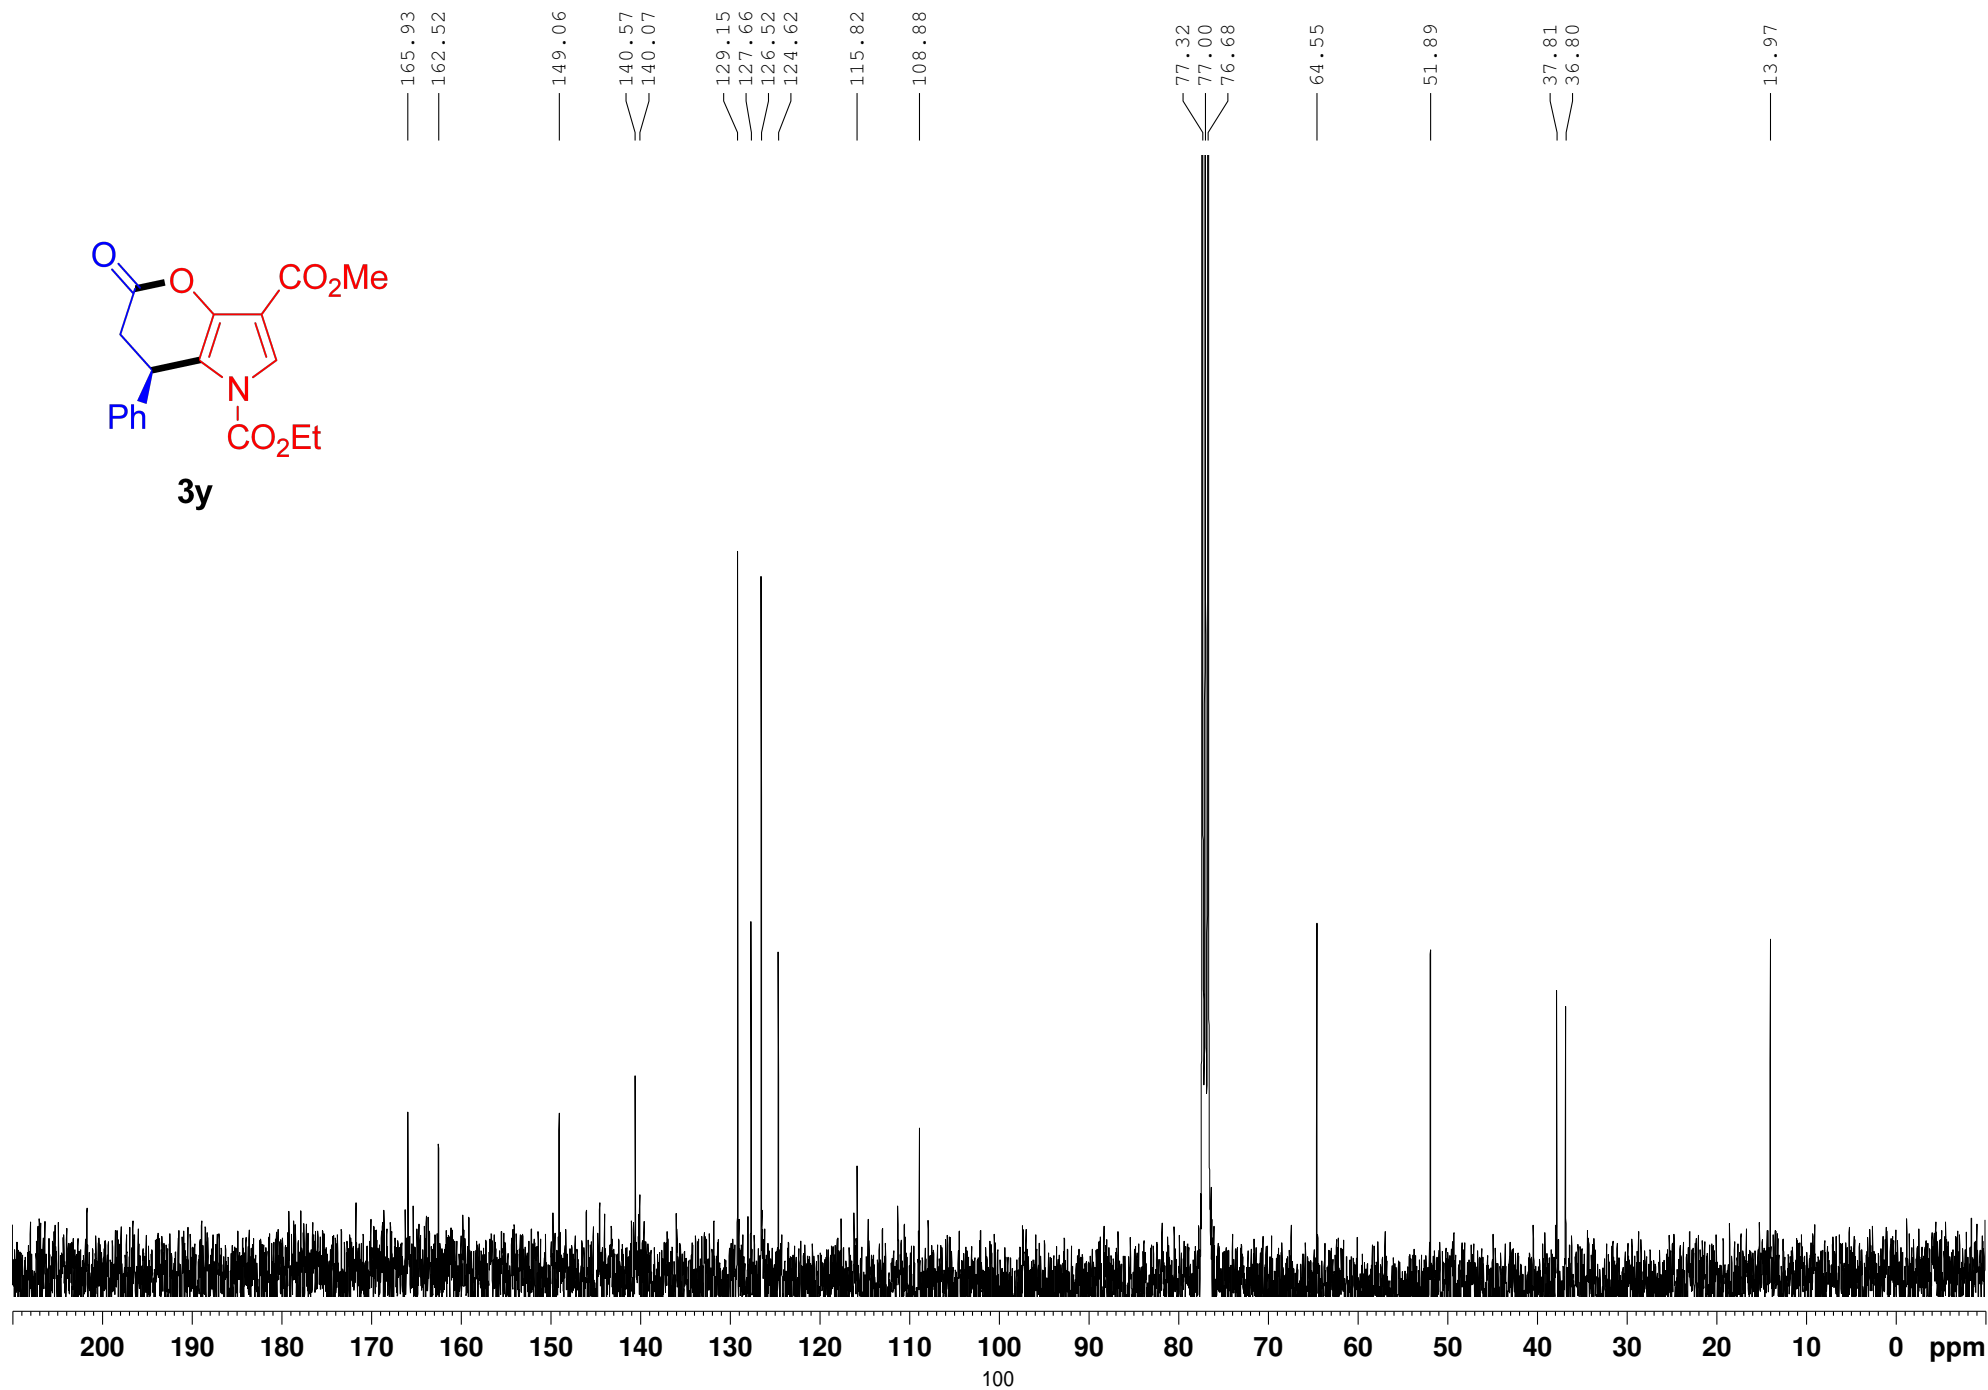

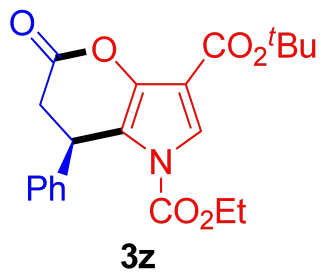

7.725  
7.305  
7.288  
7.268  
7.244  
7.227  
7.208  
7.079  
7.061

4.811  
4.792  
4.337  
4.328  
4.319  
4.311  
4.294  
4.277  
4.269  
4.260  
4.251

3.255  
3.235  
3.216  
3.195  
2.948  
2.946  
2.909  
2.906

1.591  
1.265  
1.247  
1.229

0.000

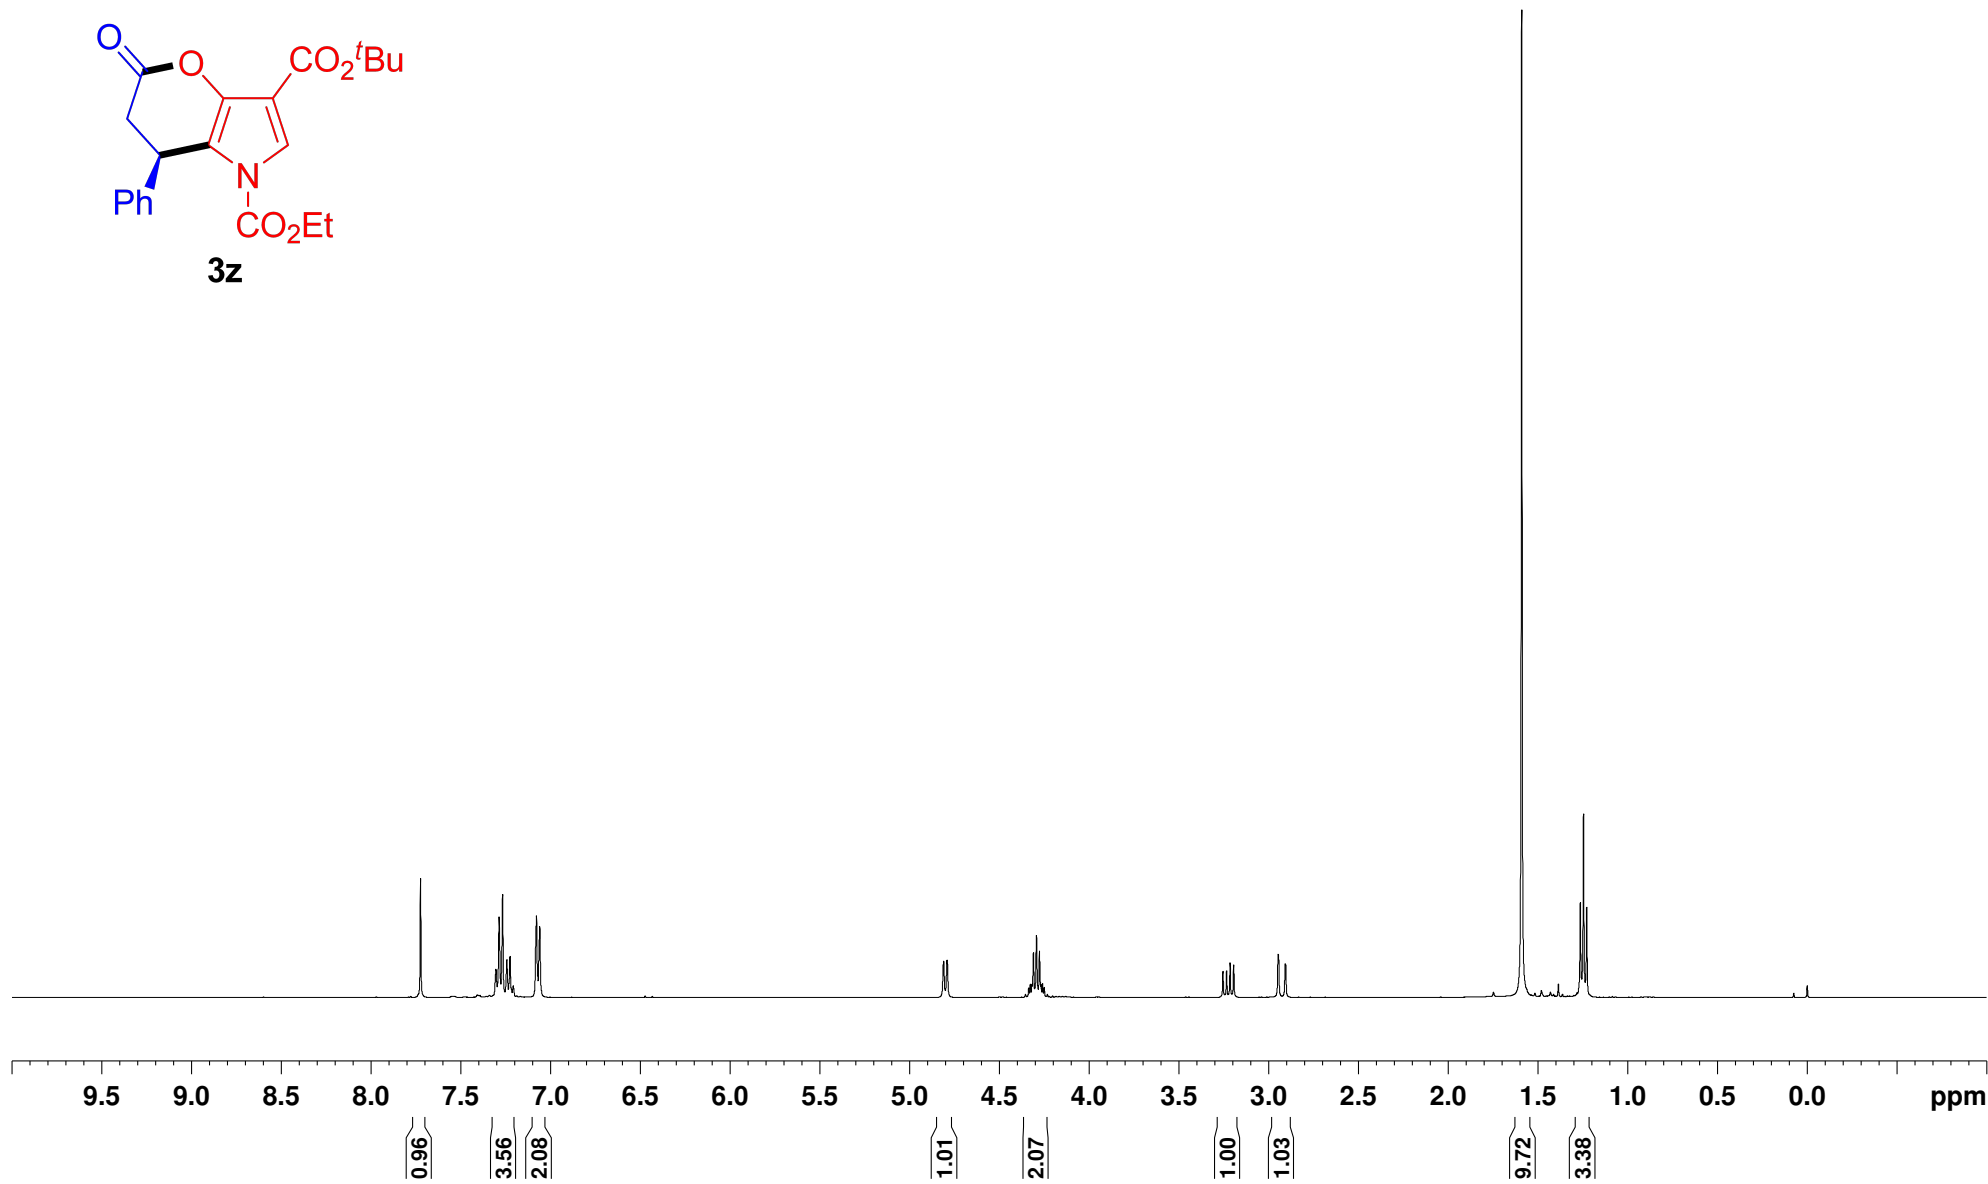

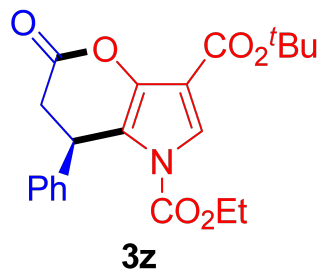

— 165.84

— 161.17

— 149.21

— 140.72

— 140.46

— 129.05

— 127.52

— 126.52

— 123.96

— 115.50

— 110.58

— 81.49

— 77.32

— 77.00

— 76.68

— 64.36

— 37.84

— 36.84

— 28.21

— 13.92

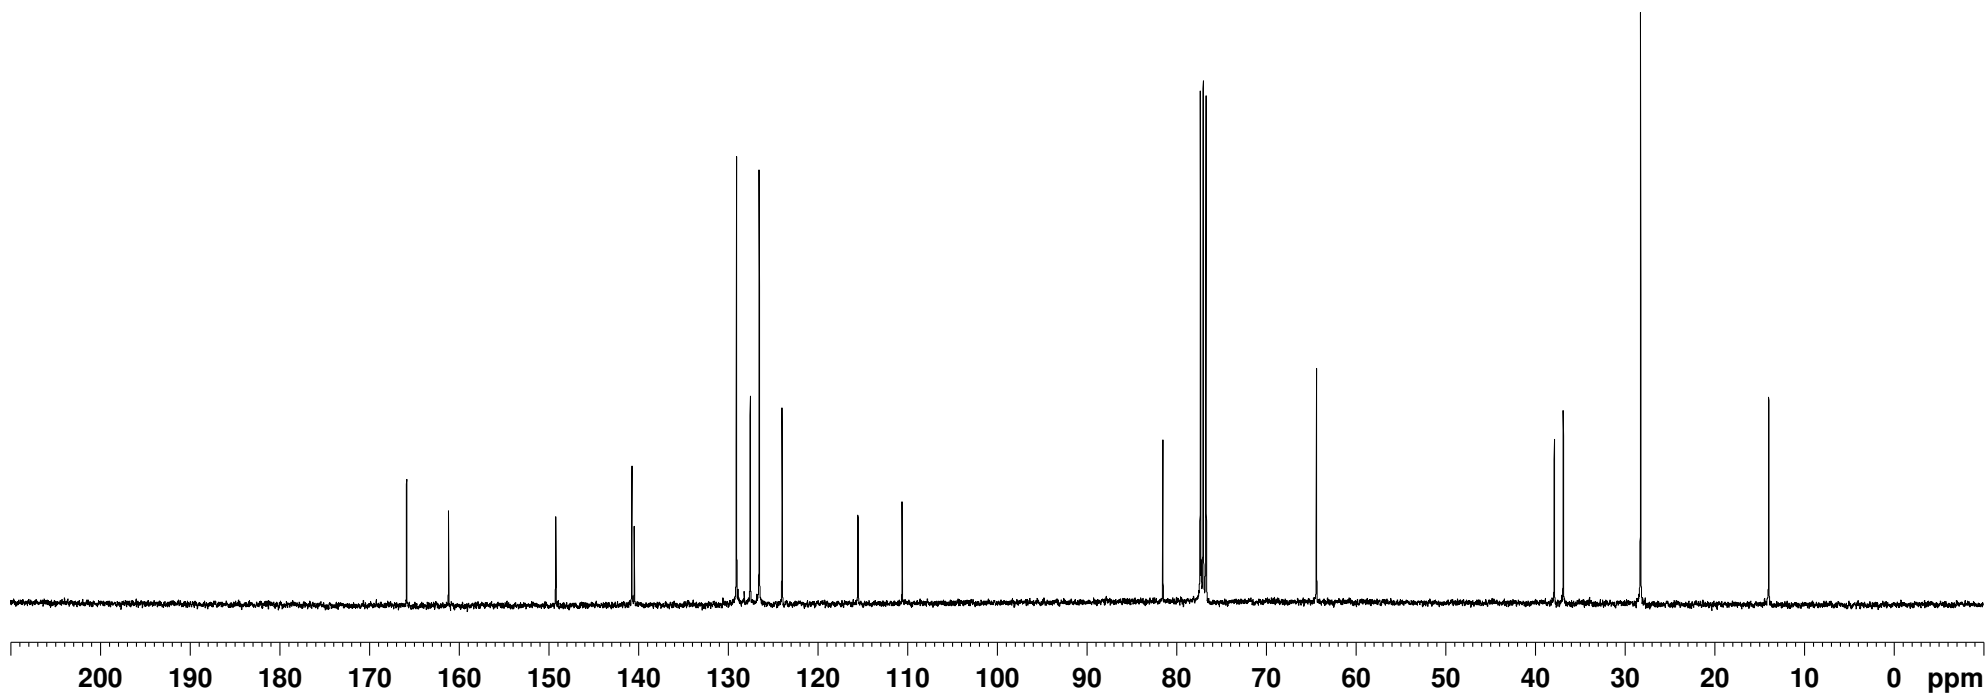

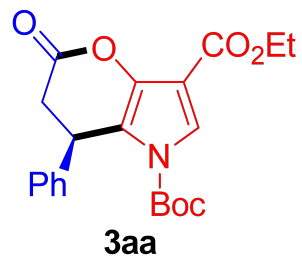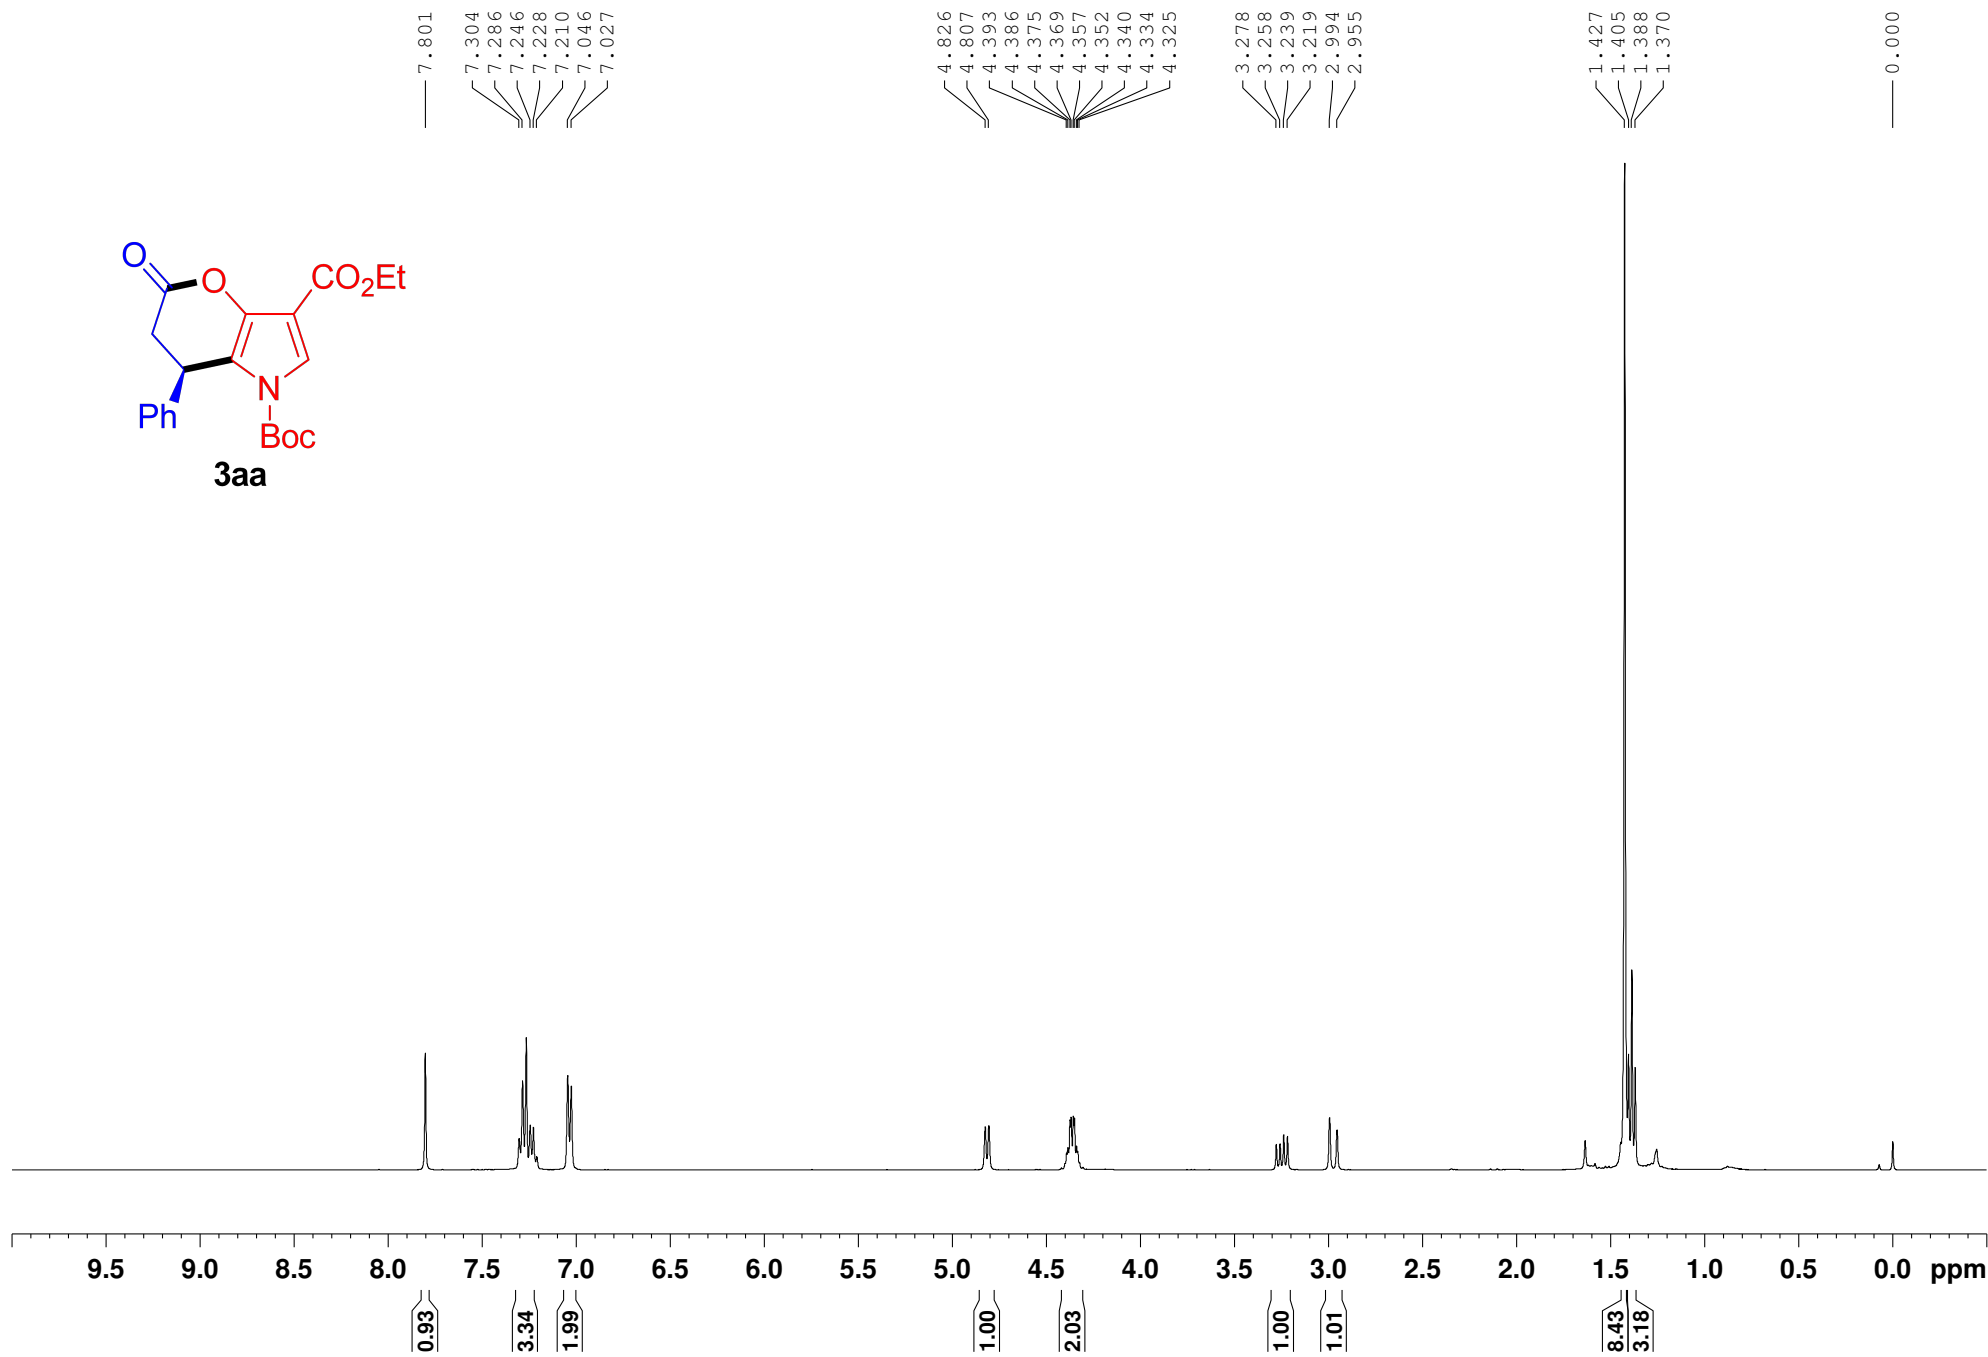

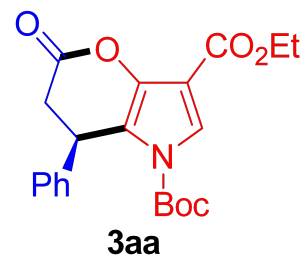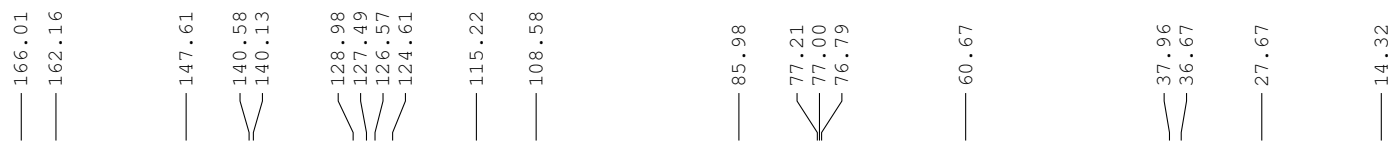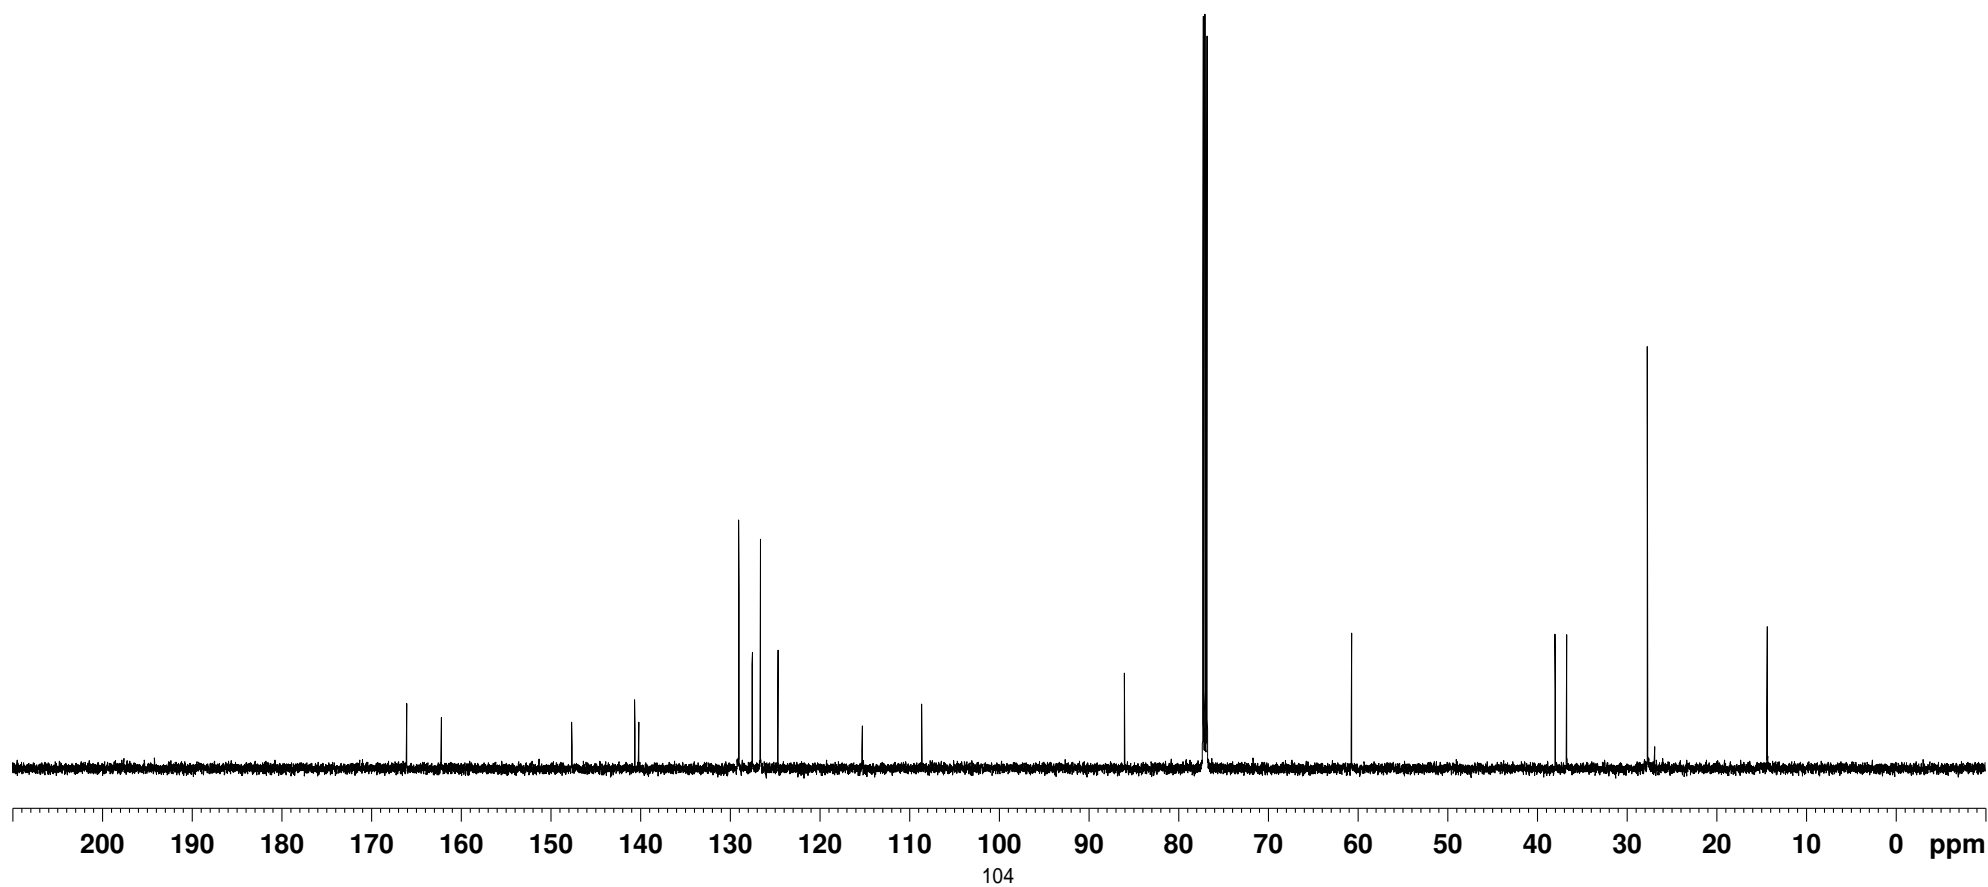



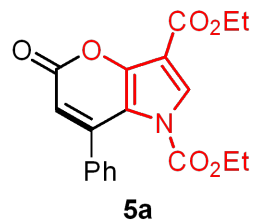

8.115  
7.482  
7.473  
7.467  
7.394  
7.386  
7.376  
7.371  
7.262

6.130

4.447  
4.429  
4.411  
4.393  
3.831  
3.813  
3.795  
3.777

1.435  
1.417  
1.399  
0.959  
0.941  
0.923

0.000

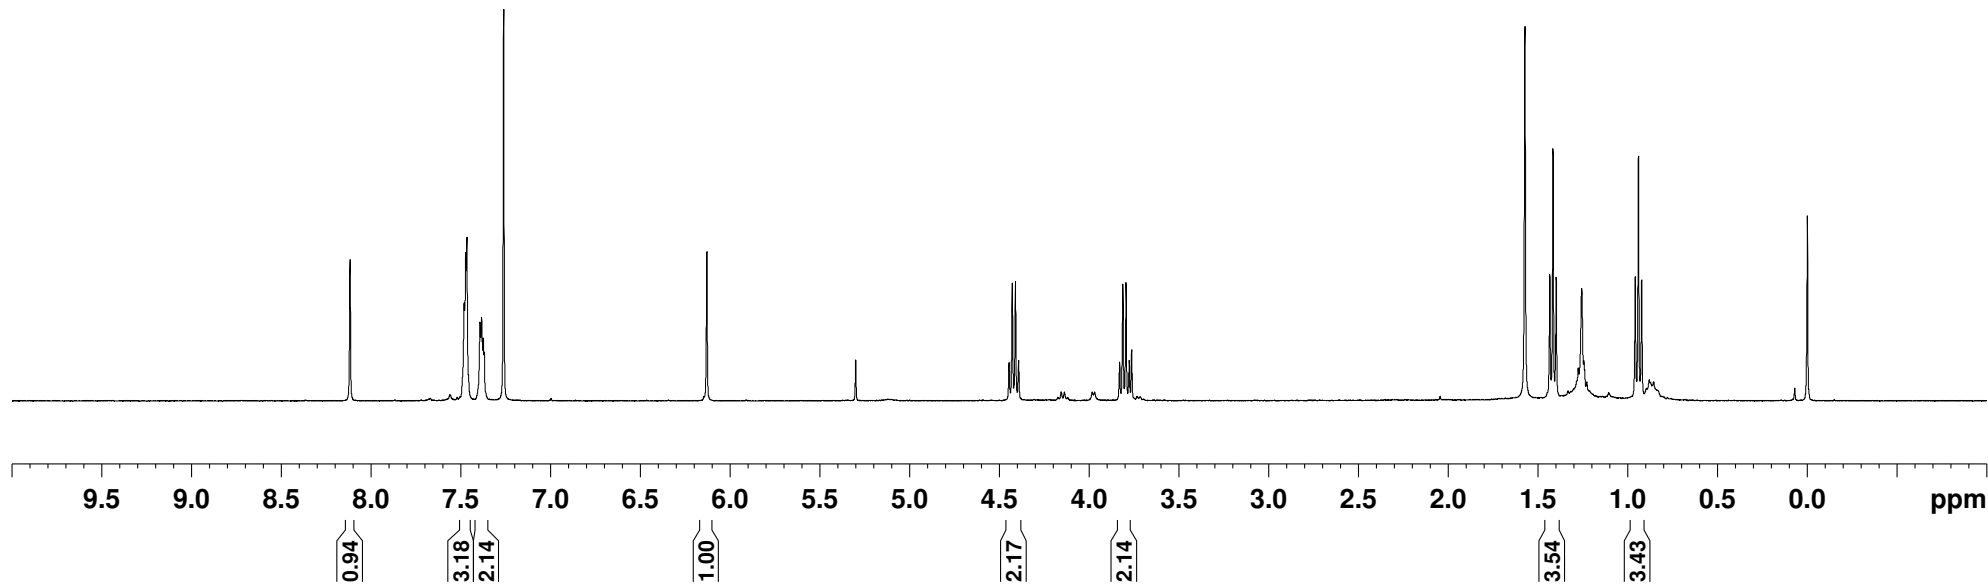

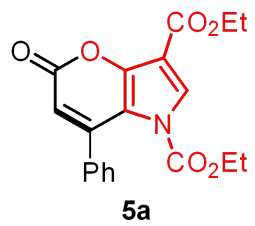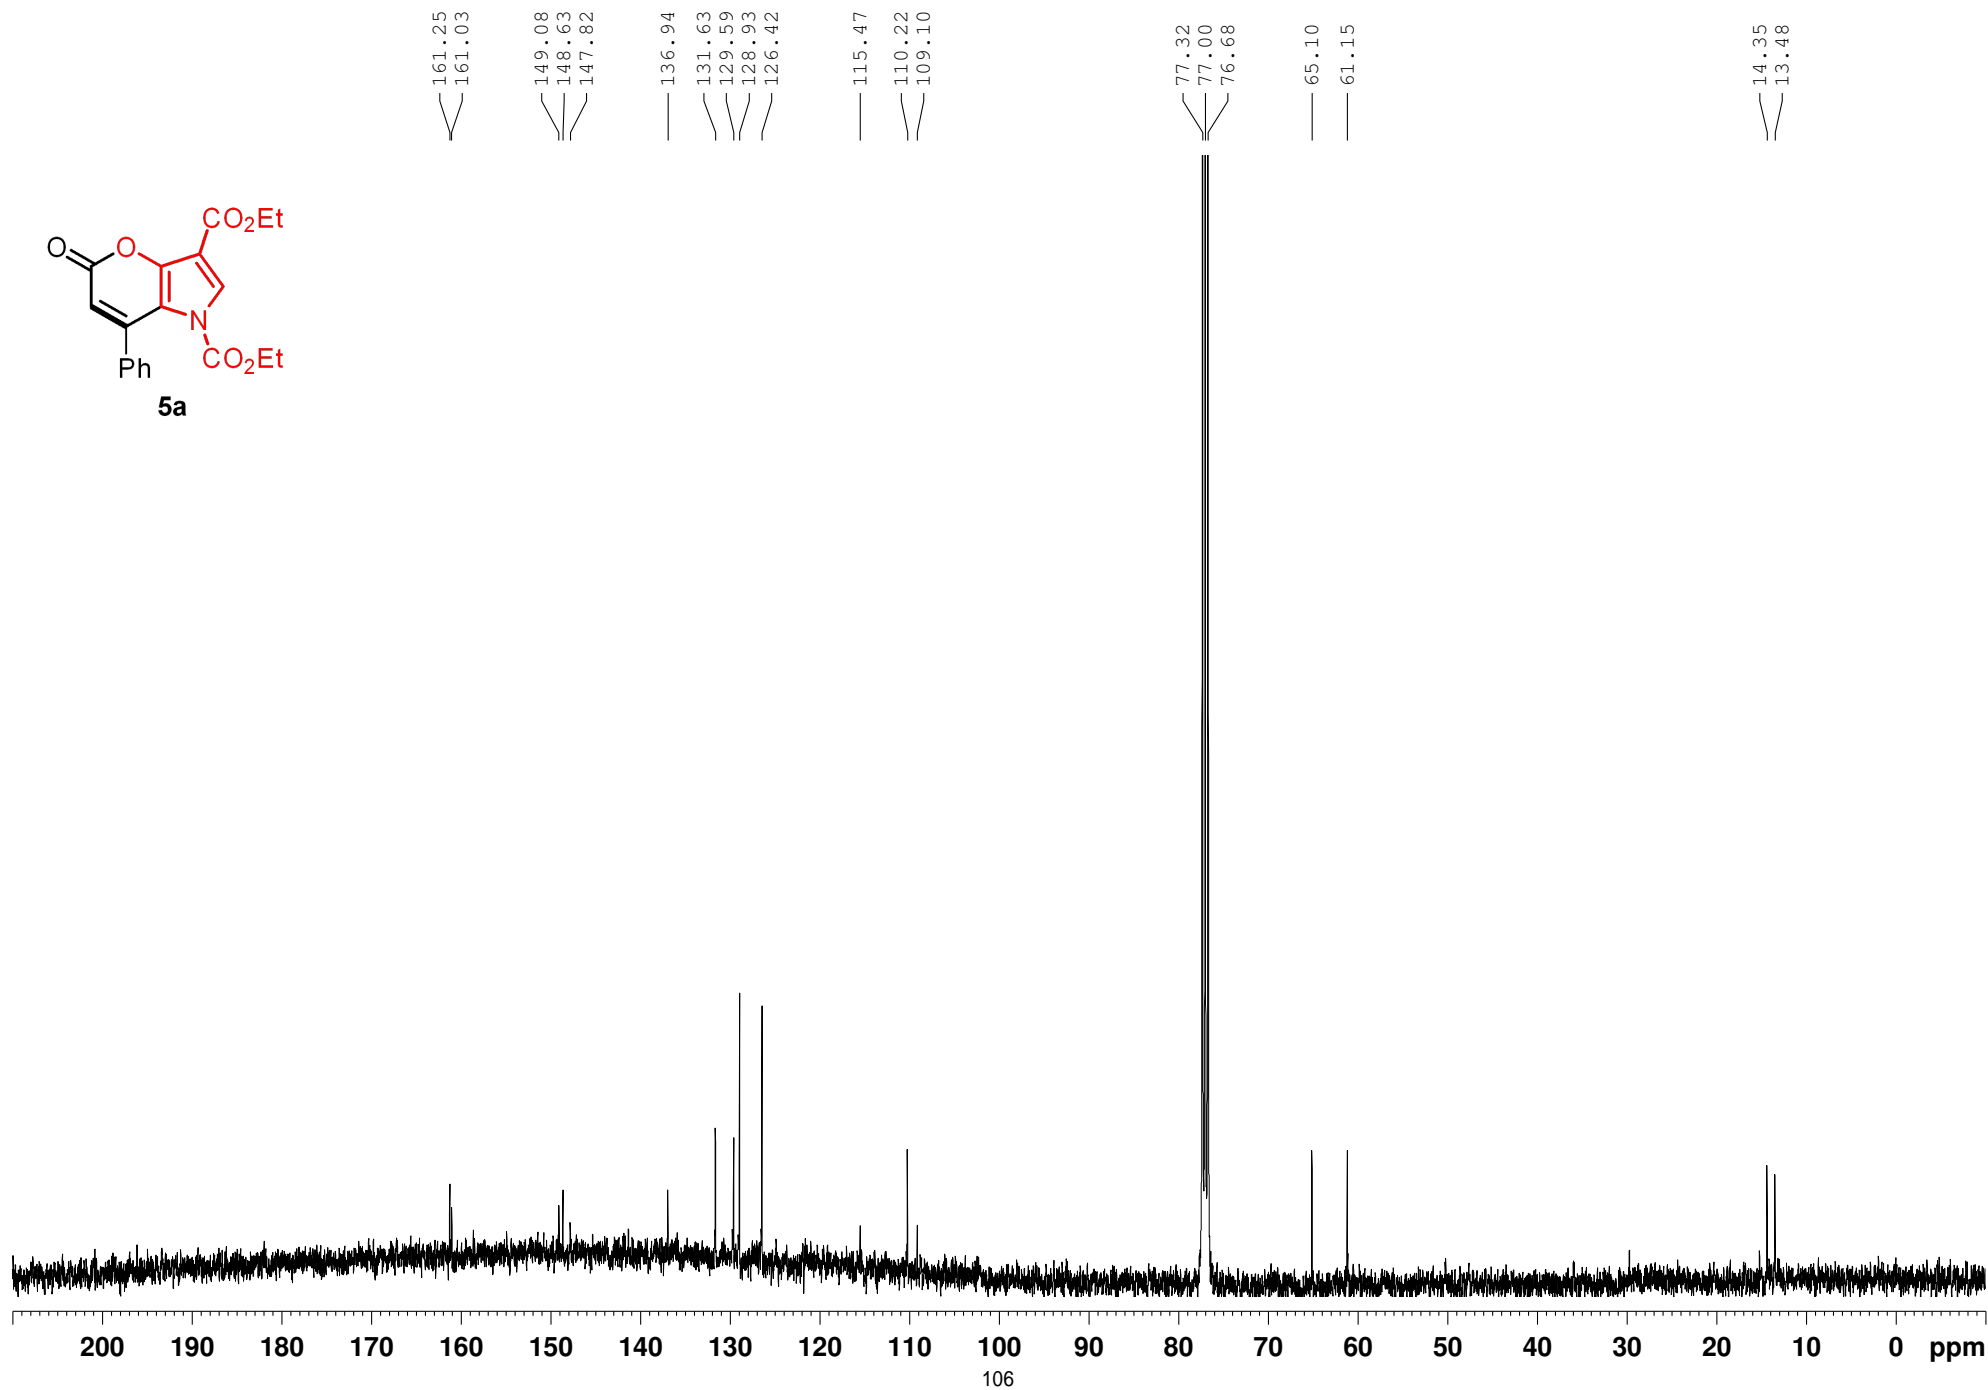

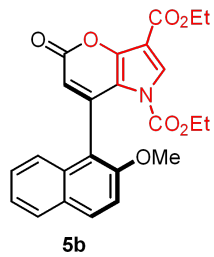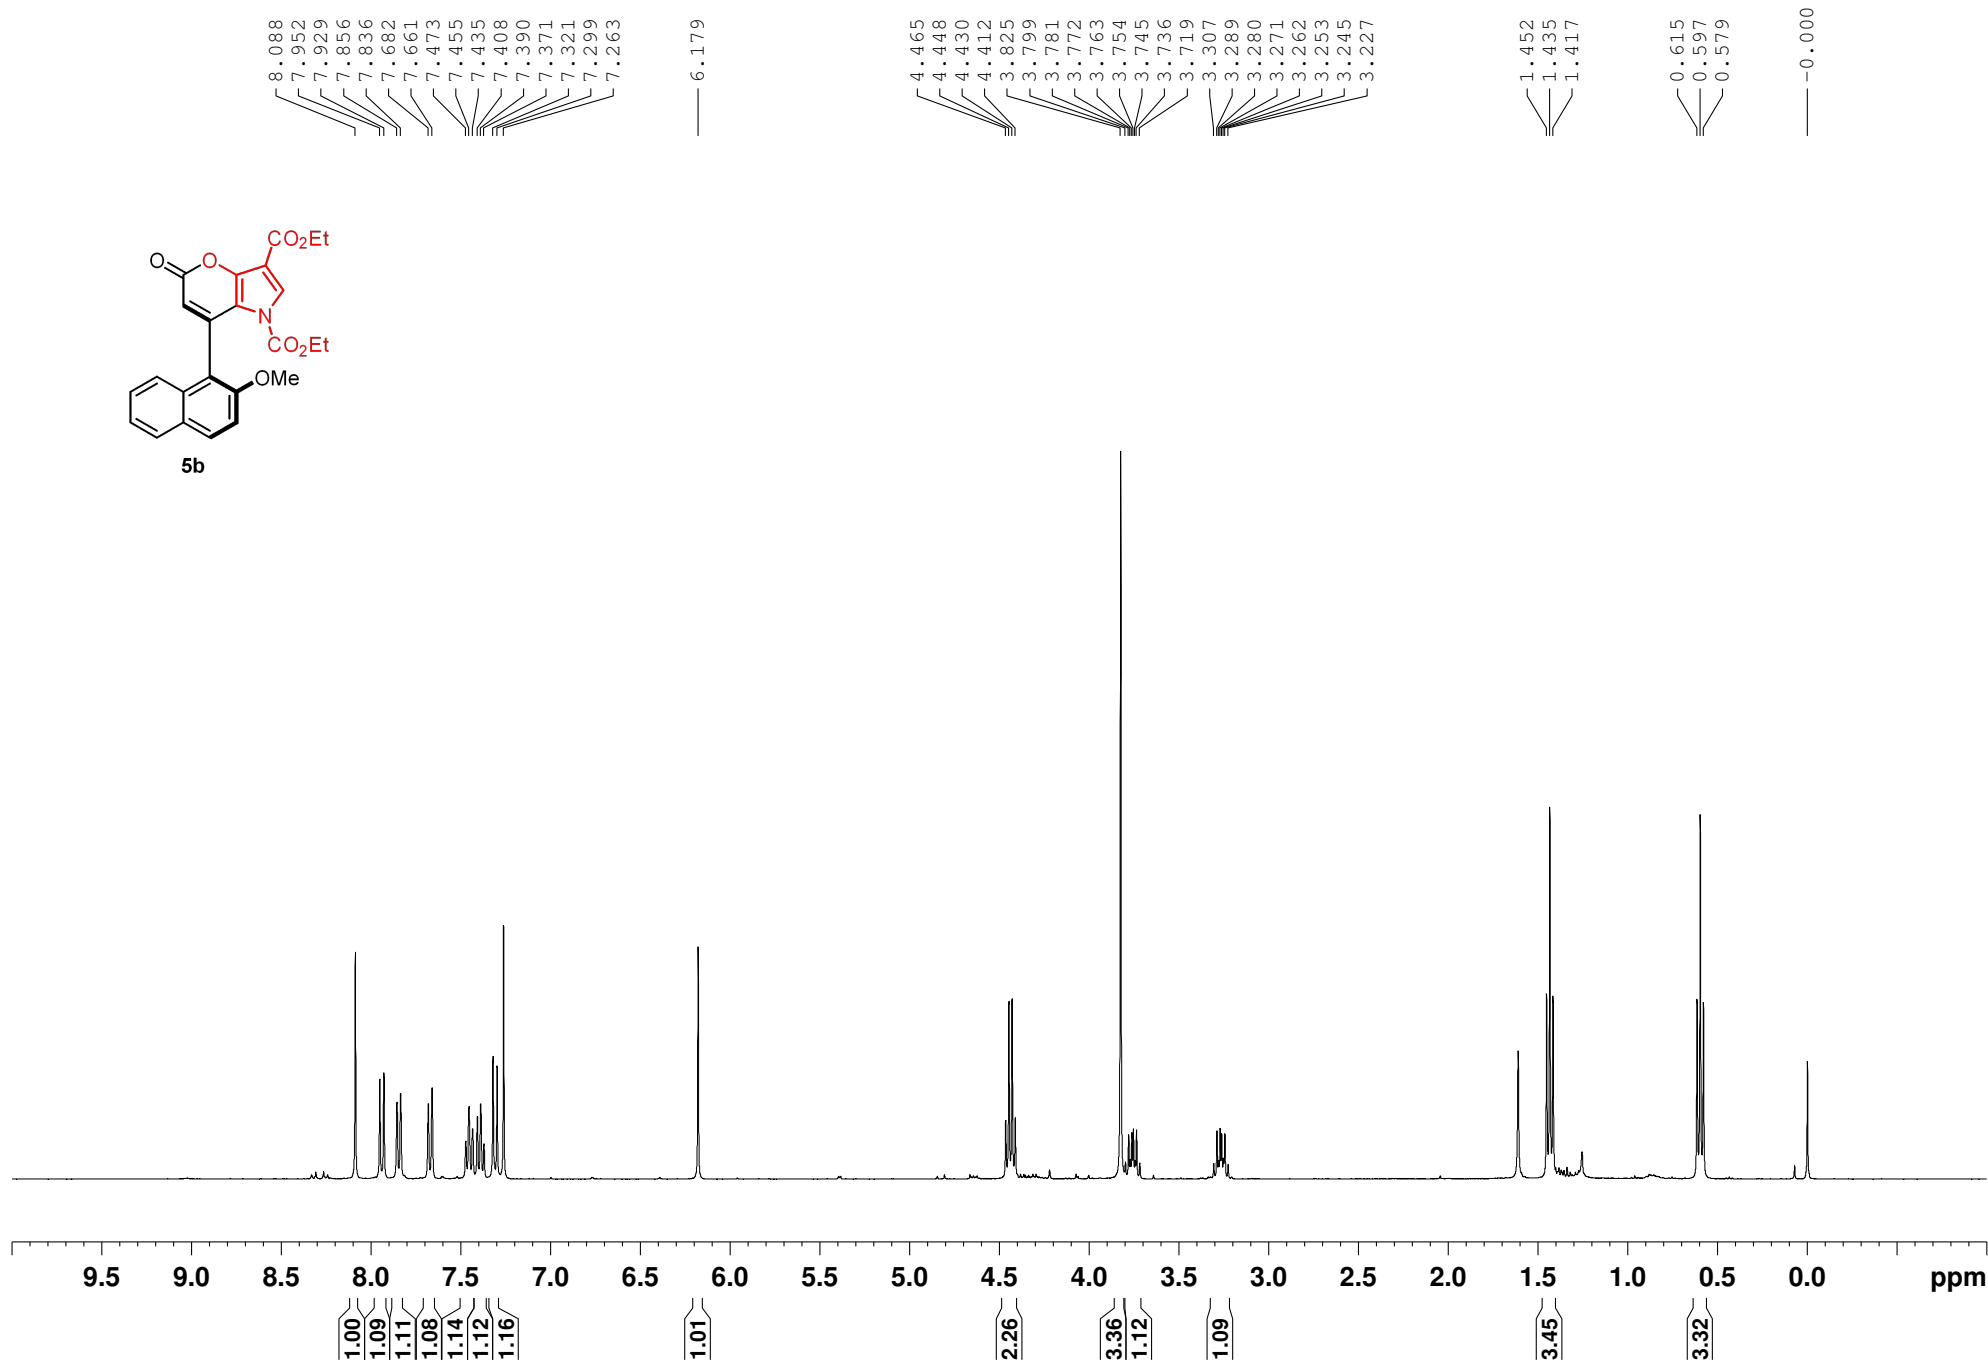

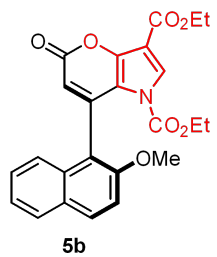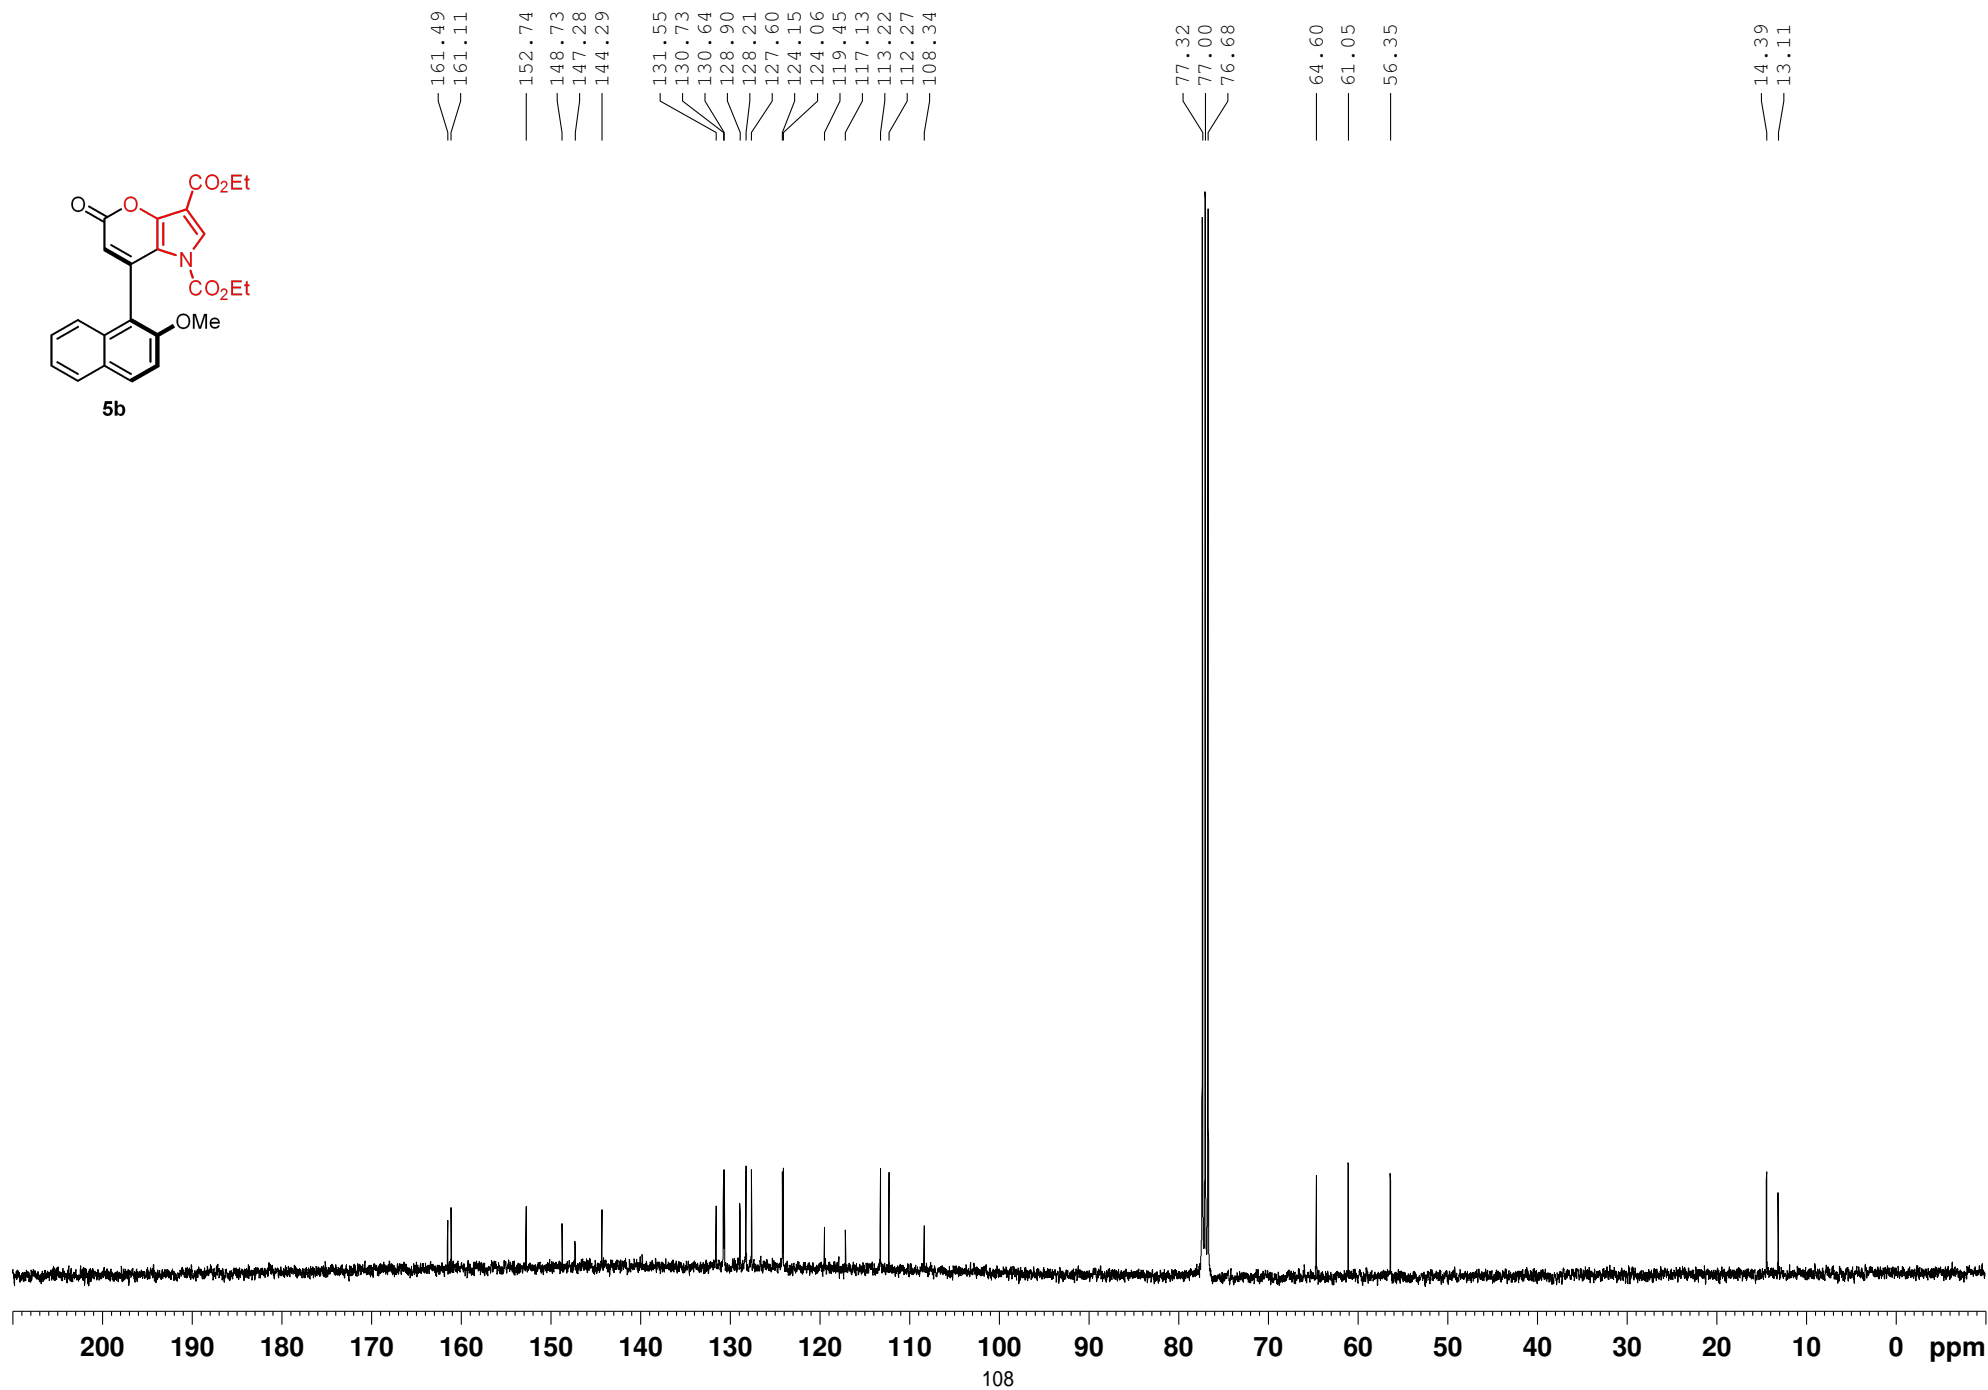

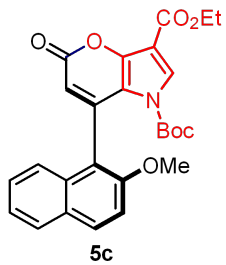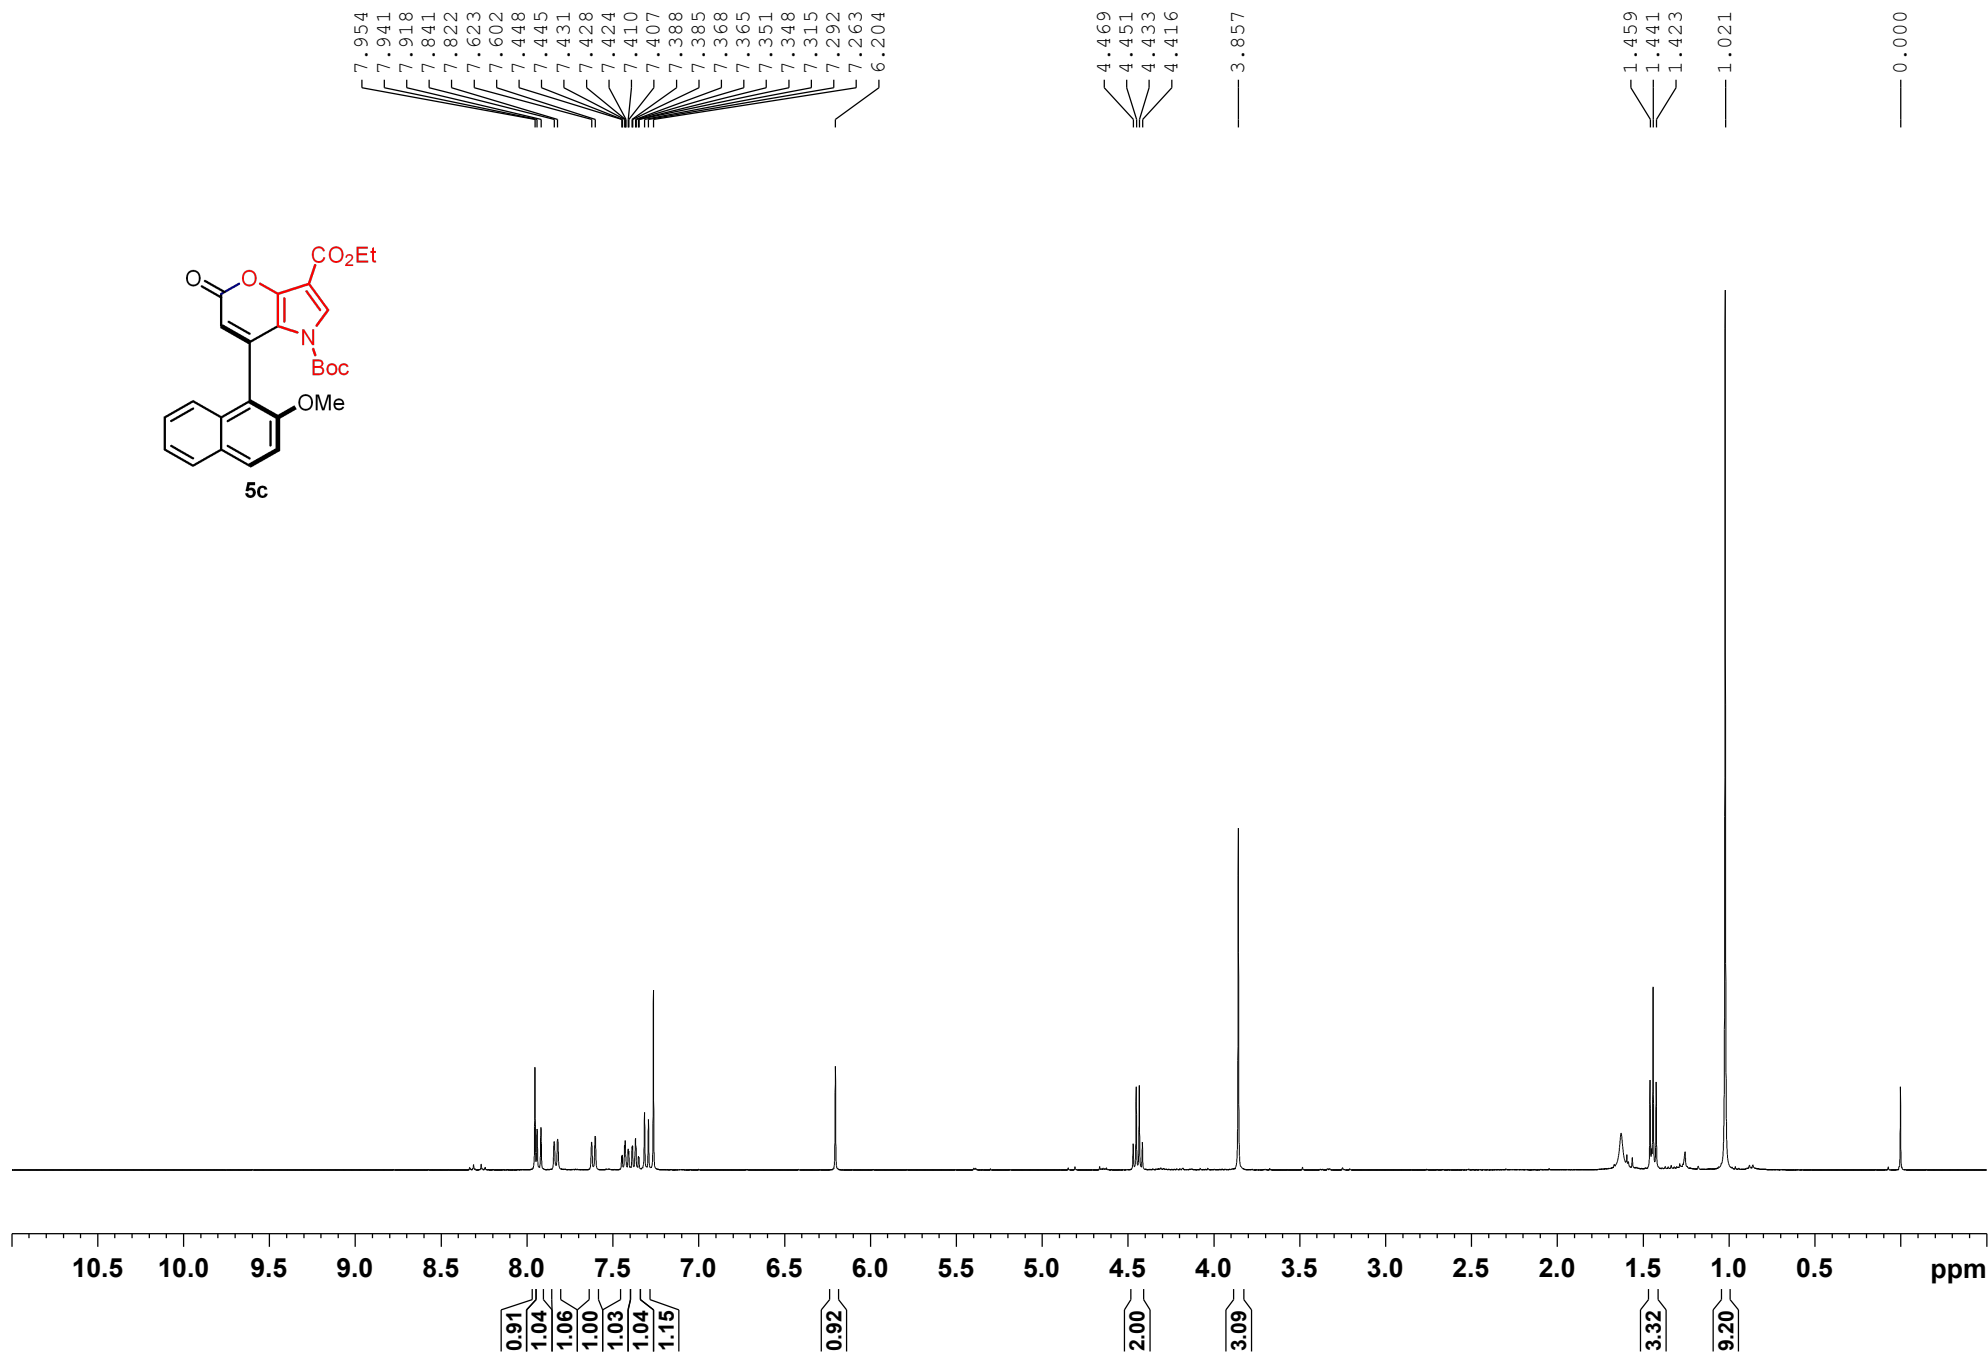

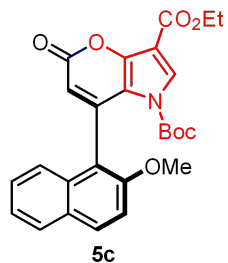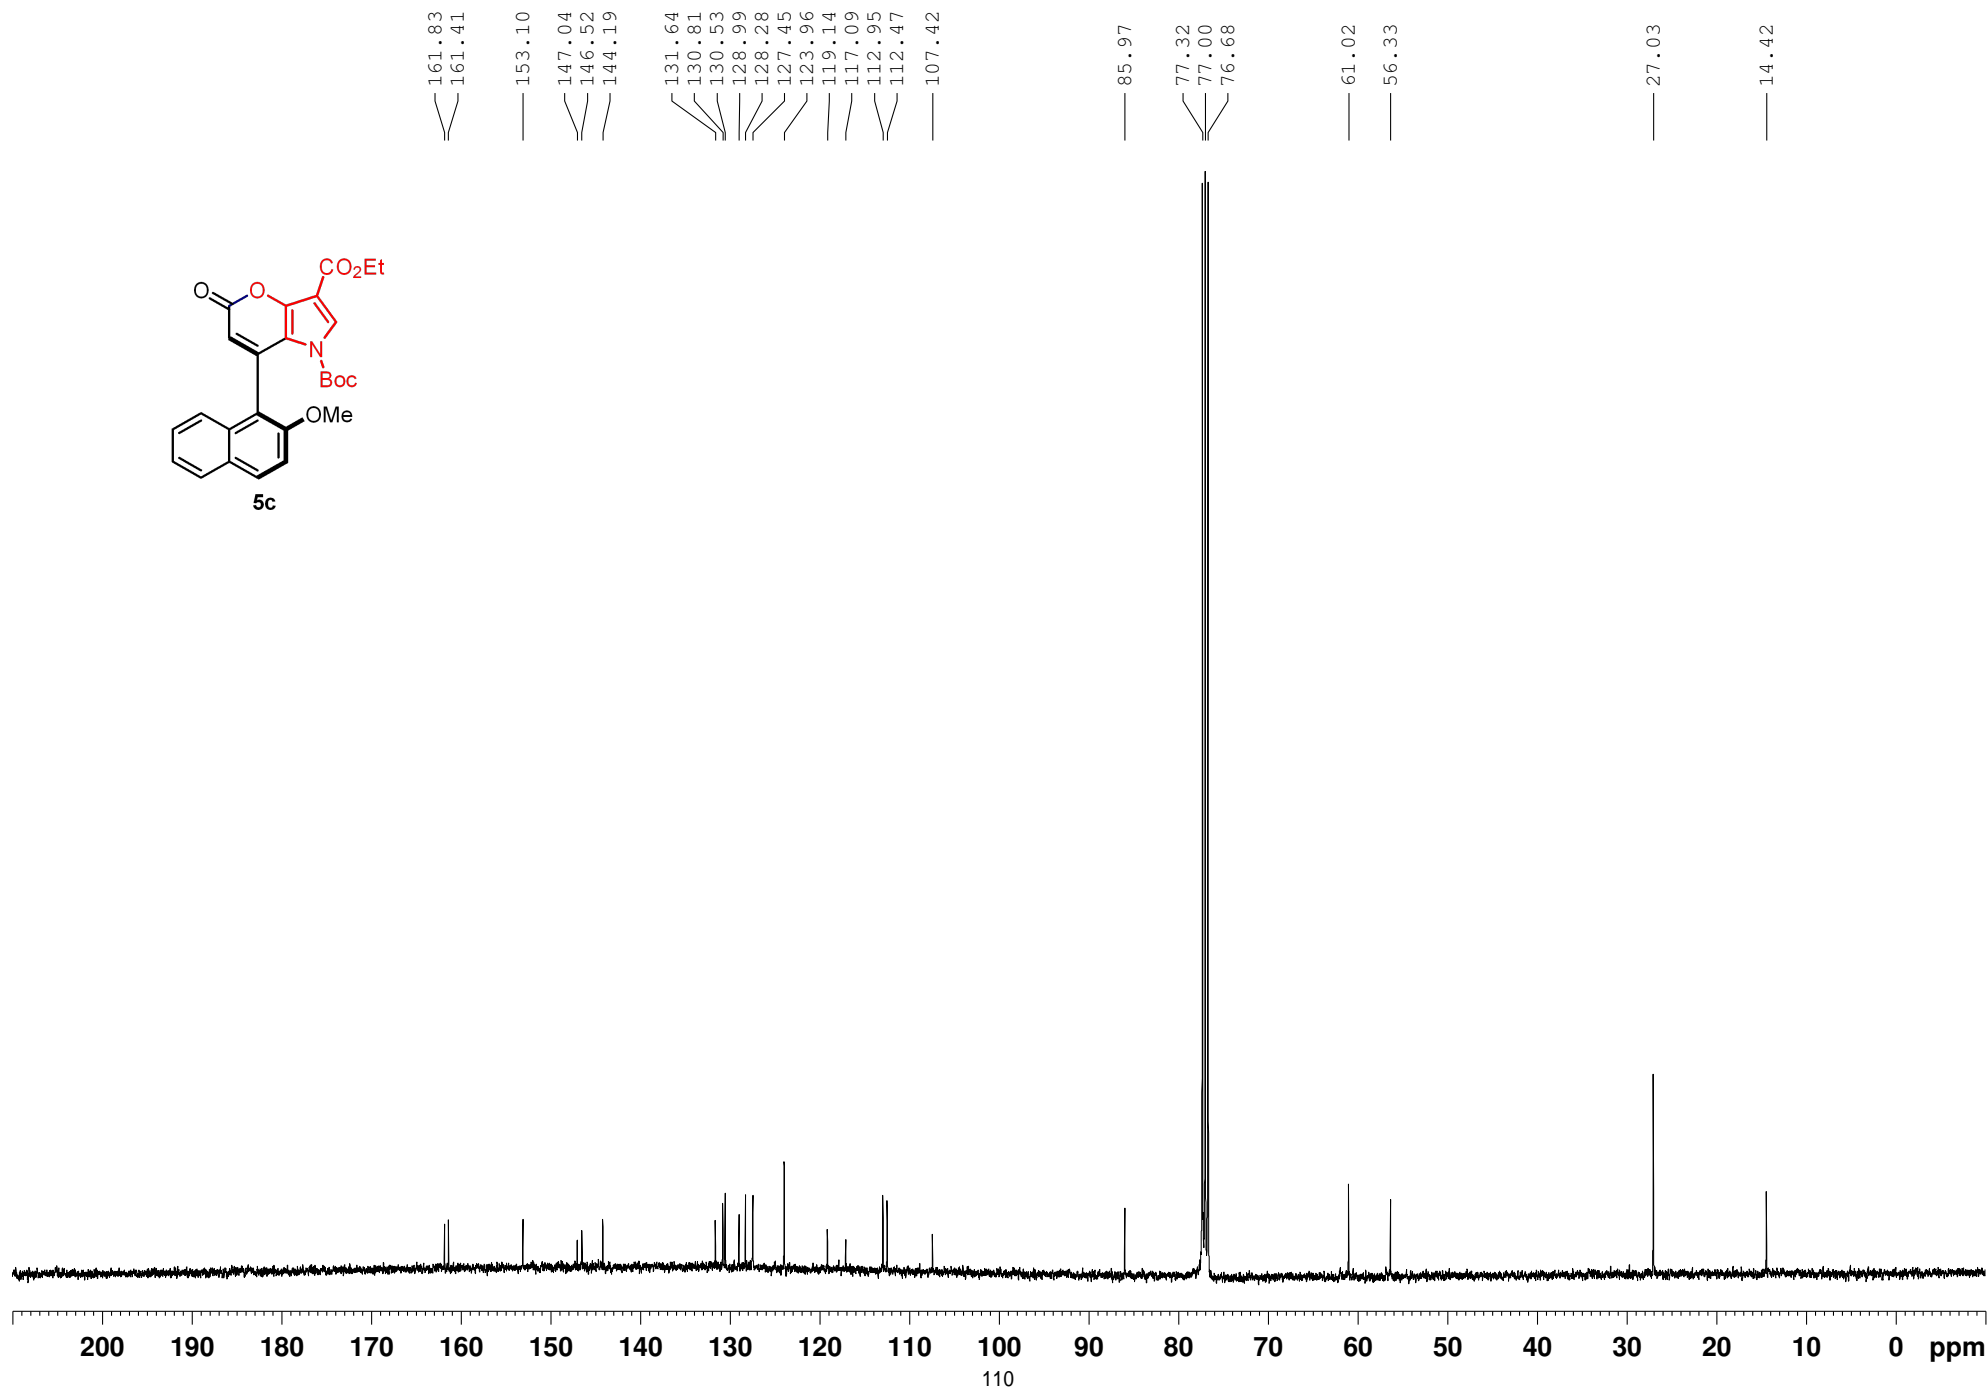

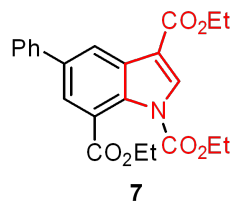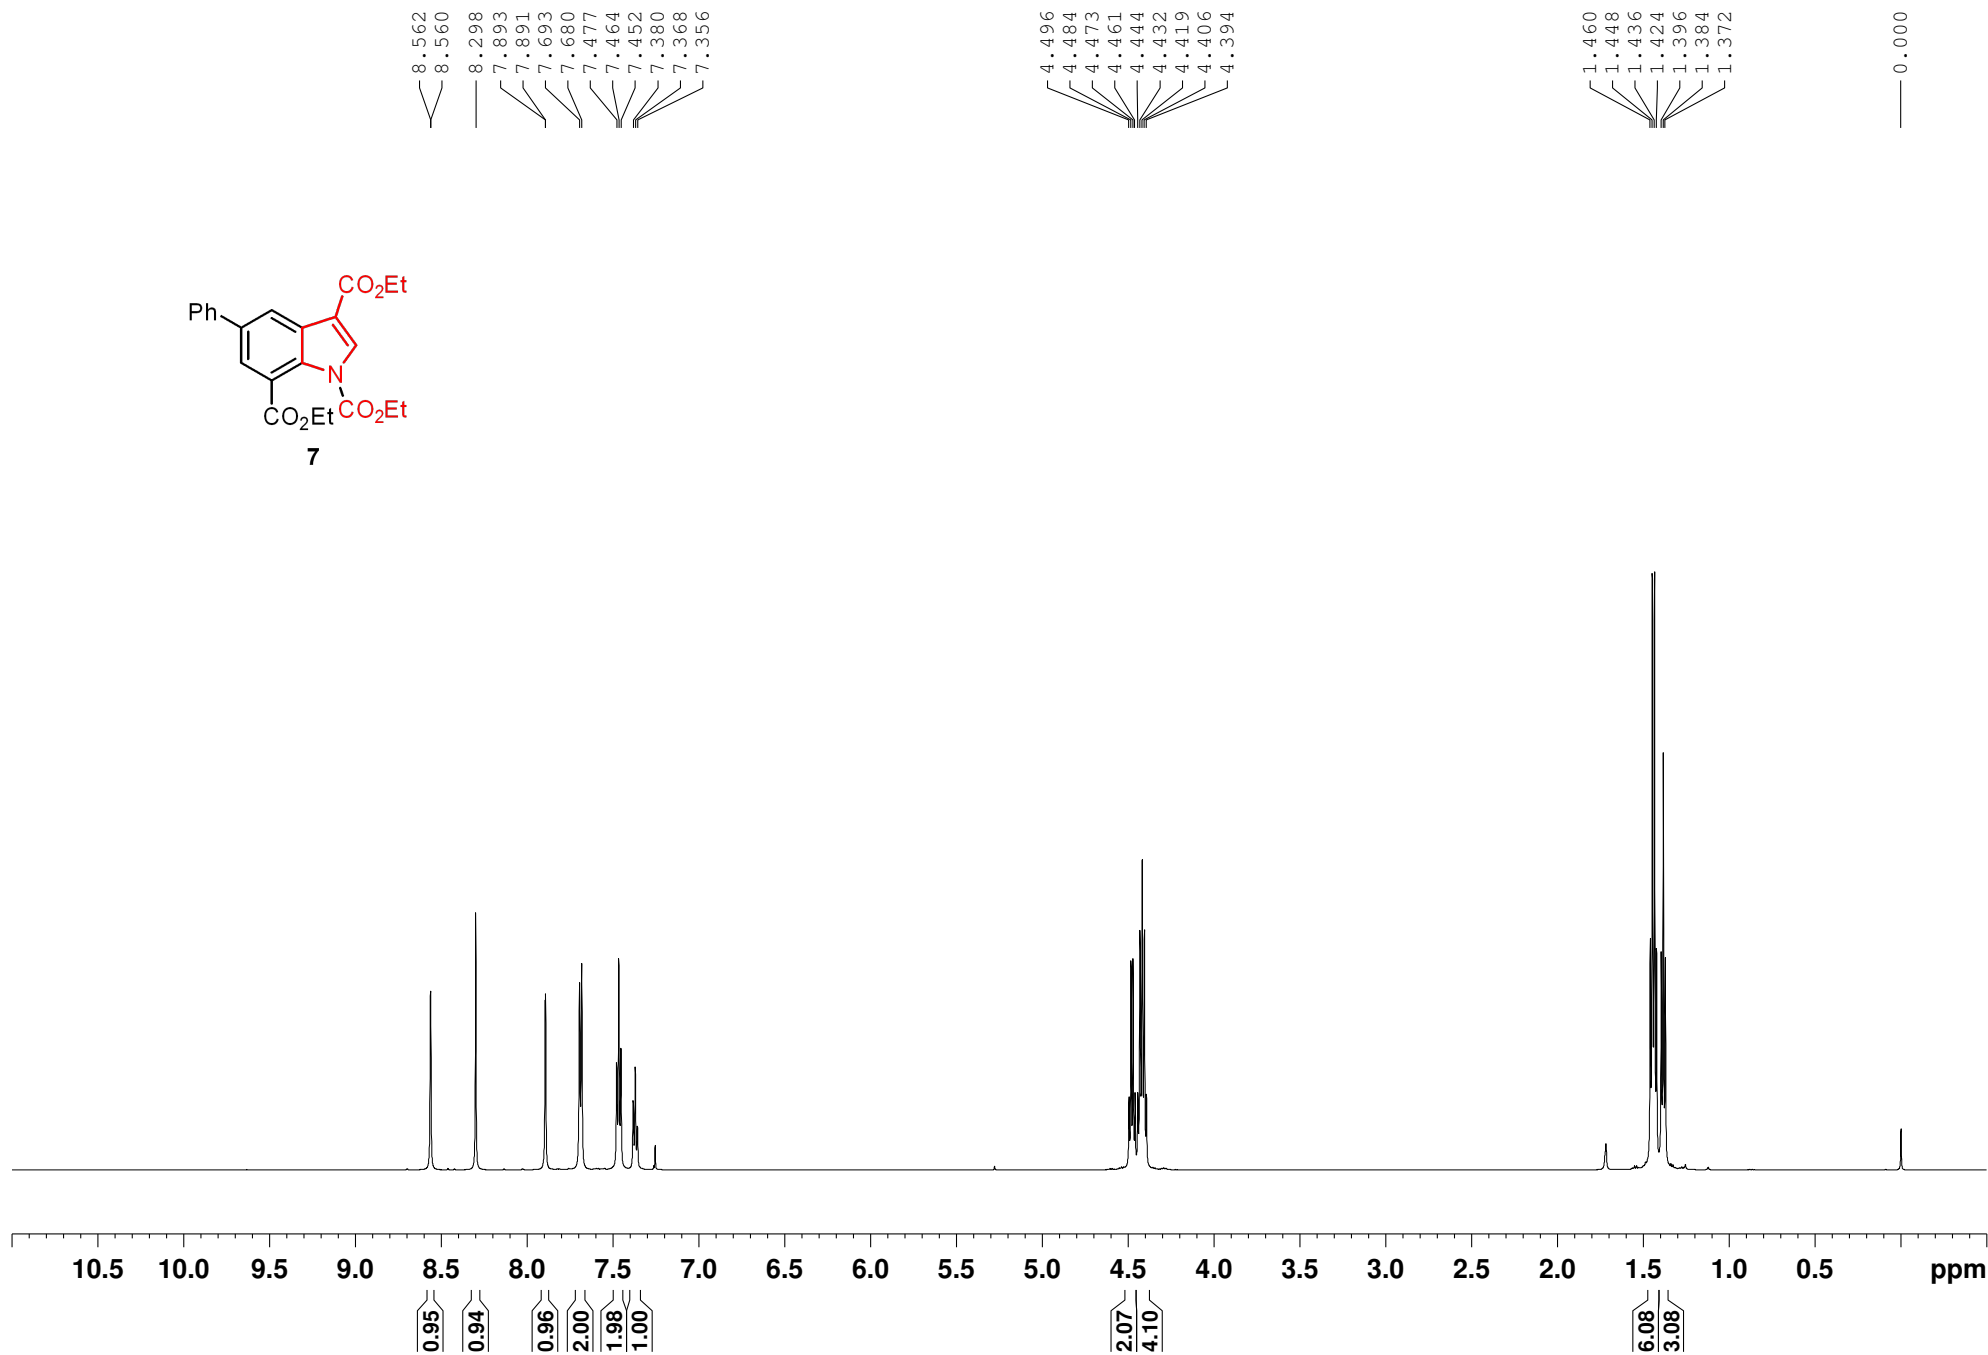

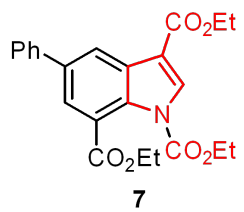

— 167.56  
— 163.64

— 150.15

— 140.23  
— 137.46  
— 133.92  
— 131.13  
— 129.62  
— 128.79  
— 127.43  
— 127.38  
— 125.39  
— 122.90  
— 121.59  
— 113.17

— 77.21  
— 77.00  
— 76.79

— 64.48  
— 61.30  
— 60.50

— 14.38  
— 14.17  
— 14.11

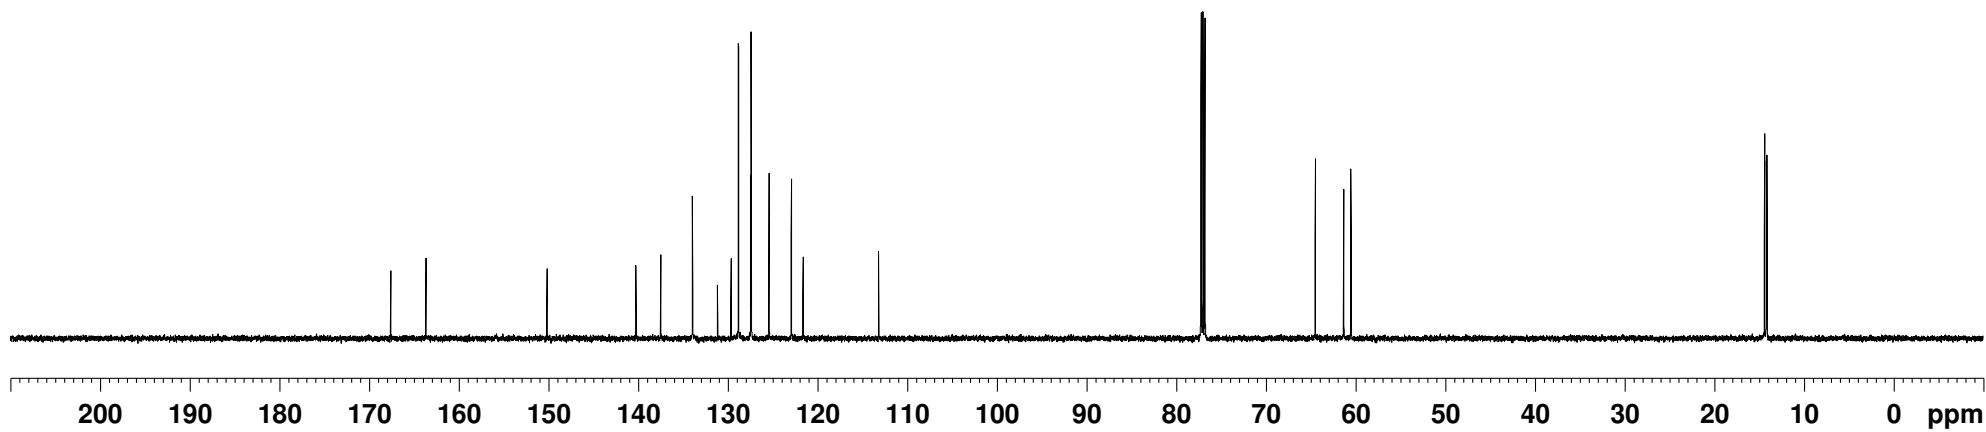

Supplement: d0cc04661b1.pdf [file d0cc04661b1.pdf]
